# Supplementary material for: High-dimensional single-cell analysis identifies cellular signatures associated with response to vedolizumab therapy in ulcerative colitis
Source: Research Square preprint supplement (doi:10.21203/rs.3.rs-3348629/v1), 2023-10-02
Supplement: Supplementary file 1 [file 50376e9fe7b7424307f99966.xlsx]

## Sheet: Supplementary Table 1
Supplementary Table 1
Characteristics of gut mucosal biopsies obtained from 25 patients with ulcerative colitis prior to and after 14 weeks of vedolizumab treatment
This table provides additional detailed data pertaining to Figure 1 and Supplementary Figure 1
	pre-VDZ		post-VDZ
patient	sampled location	inflammation state	sampled location	inflammation state
1	ascendens	inflamed	sigmoid	non-inflamed
	transversum	non-inflamed
2	ascendens	non-inflamed	sigmoid	inflamed
	rectum	inflamed
3	sigmoid	inflamed	sigmoid	inflamed
4	rectum	inflamed	rectum	non-inflamed
	sigmoid	non-inflamed	sigmoid	non-inflamed
5	sigmoid	inflamed	sigmoid	non-inflamed
	transversum	non-inflamed	rectum	non-inflamed
6	sigmoid	non-inflamed	sigmoid	non-inflamed
7	sigmoid	non-inflamed	sigmoid	non-inflamed
8	sigmoid	inflamed	sigmoid	non-inflamed
			rectum	inflamed
9	sigmoid	inflamed	rectum	inflamed
	sigmoid	non-inflamed	sigmoid	non-inflamed
10	sigmoid	inflamed	sigmoid	non-inflamed
	rectum	inflamed
11	ascendens	non-inflamed	sigmoid	non-inflamed
	rectum	inflamed
12	ascendens	inflamed	sigmoid	non-inflamed
	descendens	inflamed	transversum	non-inflamed
13	sigmoid	inflamed	sigmoid	non-inflamed
	descendens	inflamed
14	sigmoid	inflamed	sigmoid	non-inflamed
	sigmoid	non-inflamed
15	sigmoid	inflamed	sigmoid	inflamed
16	sigmoid	inflamed	sigmoid	non-inflamed
	descendens	non-inflamed	rectum	non-inflamed
17	sigmoid	inflamed	sigmoid	inflamed
	sigmoid	non-inflamed	sigmoid	non-inflamed
18	sigmoid	inflamed	sigmoid	non-inflamed
19	sigmoid	inflamed	sigmoid	non-inflamed
	rectum	inflamed	sigmoid	non-inflamed
20	sigmoid	inflamed	rectum	inflamed
	sigmoid	non-inflamed	sigmoid	non-inflamed
21	rectum	inflamed	sigmoid	non-inflamed
	sigmoid	non-inflamed
22	rectum	non-inflamed	rectum	inflamed
	sigmoid	non-inflamed	sigmoid	non-inflamed
23	ascendens	inflamed	sigmoid	non-inflamed
	sigmoid	inflamed
24	sigmoid	inflamed	descendens	non-inflamed
			sigmoid	non-inflamed
25	sigmoid	non-inflamed	sigmoid	inflamed
			sigmoid	non-inflamed
VDZ, vedolizumab; pre-VDZ, study time point of 2 weeks prior to start of vedolizumab treatment; post-VDZ, study time point of 14 weeks after the start of vedolizumab treatment

## Sheet: Supplementary Table 2
Supplementary Table 2
Response outcomes
This table provides additional detailed data pertaining to Figure 1 and Extended Data Figure 1
patient	response by PGA	SCCAI pre-VDZ	SCCAI post-VDZ	SSCAI difference*	Clinical response	Mayo pre-VDZ	Mayo post-VDZ	Mayo difference**	Endoscopic response	Mucosal healing
1	yes	3	2	1	no	3-3-3-3-1	x-x-1-1-1	4	yes	no
2	yes	13	5	8	yes	0-0-1-2-2	x-x-1-1-1	2	no	no
3	no	10	5	5	yes	x-x-3-3-3	x-x-3-3-3	0	no	no
4	yes	7	4	3	yes	x-x-0-0-2	x-x-0-0-1	1	no	yes
5	yes	10	2	8	yes	0-0-1-2-2	x-x-0-0-0	5	yes	yes
6	no	1	1	0	no	1-1-1-1-0	1-1-1-1-0	0	no	no
7	yes	2	4	-2	no	0-0-1-1-0	0-0-0-0-0	2	no	yes
8	yes	5	1	4	yes	0-0-1-1-1	0-0-0-0-2	1	no	no
9	no	11	11	0	no	0-0-0-2-3	x-x-0-0-3	2	no	no
10	yes	8	0	8	yes	3-3-3-3-3	x-x-0-0-0	9	yes	yes
11	yes	7	4	3	yes	0-0-0-2-3	x-0-1-2-1	1	no	no
12	yes	12	1	11	yes	3-3-2-2-1	x-2-0-0-0	5	yes	no
13	no	7	3	4	yes	3-0-0-1-0	0-0-0-2-3	-4	no	no
14	no	6	4	2	no	0-0-1-2-1	x-x-1-1-1	1	no	no
15	no	5	4	1	no	2-2-2-2-2	x-x-1-2-2	1	no	yes
16	yes	3	3	0	no	0-0-0-1-0	x-x-0-0-1	0	no	yes
17	yes	7	4	3	yes	0-3-0-3-3	x-x-0-2-2	2	no	no
18	yes	4	1	3	yes	2-2-2-2-2	x-0-1-0-0	5	yes	no
19	yes	7	1	6	yes	0-0-0-3-3	x-x-0-3-0	3	yes	no
20	no	1	1	1	no	0-0-0-3-3	x-x-0-0-3	3	yes	no
21	no	8	3	5	yes	x-x-0-0-3	x-x-0-0-3	0	no	no
22	yes	1	1	0	no	0-0-0-0-2	x-x-0-0-1	1	no	yes
23	yes	12	0	12	yes	1-2-2-3-3	x-x-0-0-1	7	yes	yes
24	no	5	5	0	no	3-2-2-3-3	x-2-2-3-2	1	no	no
25	no	2	1	1	no	1-1-1-1-1	x-x-1-1-0	1	no	no
*Difference in SSCAI between pre-VDZ and post-VDZ
**Difference in Mayo scores between pre-VDZ endoscopy and post-VDZ endoscopy; only the last three segments of the intestinal tract are considered, therefore maximum difference in total Mayo score is 9 (from x-x-3-3-3 to x-x-0-0-0)
PGA, Physician global assessment; SCCAI, Simple Clinical Colitis Activity Index; VDZ, vedolizumab; pre-VDZ, study time point of 2 weeks prior to start of vedolizumab treatment; post-VDZ, study time point of 14 weeks after the start of vedolizumab treatment

## Sheet: Supplementary Table 3
Supplementary Table 3
Spectral flow cytometry (Cytek) panel and cell type annotation descriptions
These tables provide additional detailed data pertaining to Extended Data Figure 2
Multicolor samples							Cell type annotation
SECIFICITY	FLUOROCHROME	CLONE	CATALOG NO	VENDOR			TISSUE	COMPARTMENT	CELL TYPE	BASIC MANUAL GATING STRATEGY
Viability	Live Dead UV Blue	-	L34961	Thermo			Mucosa	T cells, NKs and ILCs	CD4+CD25- naive	TCR-CD4+CD25-CD45RA+
CD45	PerCP	HI30	304026	Biolegend			Mucosa	T cells, NKs and ILCs	CD4+ naive-like	TCR-CD4+CD25dimCD45RA+
CD3	eFluor 506*	UCTH1	69-0038-41	Thermo			Mucosa	T cells, NKs and ILCs	CD4+CD25- memory	TCR-CD4+CD25-CD45RA-
	BV510*						Mucosa	T cells, NKs and ILCs	CD4+CD25dim memory	TCR-CD4+CD25dimCD45RA-
CD4	cFluor YG584	SK3	R7-20041	CYTEK			Mucosa	T cells, NKs and ILCs	CD4+CD25int memory	TCR-CD4+CD25intCD45RA-
CD8a	BUV805	SK1	612889	BD			Mucosa	T cells, NKs and ILCs	CD4+CD56+ T	TCR-CD4+CD56+
CD25	PE-Fire700	M-A251	356145	Biolegend			Mucosa	T cells, NKs and ILCs	Tregs CD25int naive	TCR-CD4+CD25intCD45RA+
CD279 (PD-1)	BV785	EH12.2H7	329930	Biolegend			Mucosa	T cells, NKs and ILCs	Tregs CD25high memory	TCR-CD4+CD25highCD45RA-
TCRγδ	PerCP-eF710	B1.1	46-9959-41	Thermo			Mucosa	T cells, NKs and ILCs	CD8+ naive	TCR-CD8+CCR7+CD45RA+
CD14	Spark Blue 550	63D3	367148	Biolegend			Mucosa	T cells, NKs and ILCs	CD8+ TCM	TCR-CD8+CCR7+CD45RA-
CD16	BUV496	3G8	612944	BD			Mucosa	T cells, NKs and ILCs	CD8+ TEM	TCR-CD8+CCR7-CD45RA-
CD11c	eF450	3.9	48-0116-41	Thermo			Mucosa	T cells, NKs and ILCs	CD8+ TEMRA	TCR-CD8+CCR7-CD45RA+
CD19	Spark NIR 685	HIB19	302270	Biolegend			Mucosa	T cells, NKs and ILCs	gd T	TCR+
CD20	Pacific Orange	HI47	MHCD2030	Thermo			Mucosa	T cells, NKs and ILCs	DN T	TCR-CD4-CD8-CD127-CD56-CD16-
CD24	PE-Dazzle 594	ML5	311133	Biolegend			Mucosa	T cells, NKs and ILCs	DP T	TCR-CD4+CD8+
CD39**	BUV661	TU66	749967	BD			Mucosa	T cells, NKs and ILCs	NKs	TCR-CD4-CD8-CD127-CD56-CD16+/TCR-CD4-CD8-CD127-CD56+CD16+/TCR-CD4-CD8-CD127-CD56+CD16-
IgD	BV480	IA6-2	566138	BD			Mucosa	T cells, NKs and ILCs	ILCs	TCR-CD4-CD8-CD127+
IgG	BV605	G18-145	563246	BD			Mucosa	B cells	B naive	CD38-CD27-IgD+
IgM	BV570	MHM-88	314517	Biolegend			Mucosa	B cells	B memory	CD38-IgD-/CD38-CD27+IgD+
CD141	BB515	1A4	565084	BD			Mucosa	B cells	B transitional	CD38+CD27-
CD1c	AF647	L161	331510	Biolegend			Mucosa	B cells	Plasmablasts	CD38+CD27+
CD123	SB436	6H6	62-1239-42	Thermo			Mucosa	DCs and macrophages	DCs	CD14-CD123-CD103-CD11c-
CD56	BUV737	NCAM16.2	612766	BD			Mucosa	DCs and macrophages	CD103+CD11c+ DCs	CD14-CD123-CD103+CD11c+
CD197 (CCR7)	BV421	G043H7	353208	Biolegend			Mucosa	DCs and macrophages	CD123+ pDCs	CD14-CD123+
CD27	APC-H7	M-T271	560222	BD			Mucosa	DCs and macrophages	Macrophages	CD14+CD56-
CD45RA	BUV395	5H9	740315	BD			PBMCs	T cells	CD4+ naive	CD3+TCR-CD56-CD4+CD25dim/lowCCR7+CD45RA+
CD183 (CXCR3)	PE-Cy5	1C6	561731	BD			PBMCs	T cells	CD4+ TCM	CD3+TCR-CD56-CD4+CD25dim/lowCCR7+CD45RA-
CD127	APC-R700	HIL-7R-M21	565185	BD			PBMCs	T cells	CD4+ tranTCM	CD3+TCR-CD56-CD4+CD25dim/lowCCR7+CD45RAdim
CD38	APC-Fire810	HIT2	303550	Biolegend			PBMCs	T cells	CD4+ TEM	CD3+TCR-CD56-CD4+CD25dim/lowCCR7-CD45RA-
CD57	FITC	HNK-1	359604	Biolegend			PBMCs	T cells	CD4+ late TEM	CD3+TCR-CD56-CD4+CD25dim/lowCCR7-CD45RAdim
CD28	BV650	CD28.2	302946	Biolegend			PBMCs	T cells	CD4+ TEMRA	CD3+TCR-CD56-CD4+CD25dim/lowCCR7-CD45RA+
HLA-DR***	BUV563	G46-6	748340	BD			PBMCs	T cells	Tregs	CD3+TCR-CD56-CD4+CD25high
CD49d (a4 )	PE	9F10	304303	Biolegend			PBMCs	T cells	CD8+ naive	CD3+TCR-CD56-CD8+CCR7+CD45RA+
CD103 (aE)	BV711	Ber-ACT8	350221	Biolegend			PBMCs	T cells	CD8+ TCM	CD3+TCR-CD56-CD8+CCR7+CD45RA-
CD11a	PE-Cy7	TS2/4	350609	Biolegend			PBMCs	T cells	CD8+ tranTCM	CD3+TCR-CD56-CD8+CCR7+CD45RAdim
ITGB7	APC	FIB504	321207	Biolegend			PBMCs	T cells	CD8+ TEM	CD3+TCR-CD56-CD8+CCR7-CD45RA-
Multicolor integrin samples							PBMCs	T cells	CD8+ late TEM	CD3+TCR-CD56-CD8+CCR7-CD45RAdim
CD18 (B2)**	BUV661	6.7	750710	BD			PBMCs	T cells	CD8+ TEMRA	CD3+TCR-CD56-CD8+CCR7-CD45RA+
CD29 (B1)***	BUV563	2004-03-01	748619	BD			PBMCs	T cells	gd T	CD3+TCR+
In biopsies							PBMCs	T cells	DN T	CD3+TCR-CD56-CD4-CD8-
CD326	BV750			Biolegend			PBMCs	T cells	DP T	CD3+TCR-CD56-CD4+CD8+
(EpCAM)							PBMCs	T cells	NKT	CD3+TCR-CD56+
							PBMCs	B cells	B naive	CD38-CD27-IgD+
*eFluor 506 was used for the samples processed in the first batch and BV510 was used for the samples processed in the second batch.							PBMCs	B cells	B memory	CD38-IgD-/CD38-CD27+IgD+
**In the panel multicolor CD39 was used. In multicolor integrin panel CD18 was used instead of CD39.							PBMCs	B cells	B transitional	CD38+CD27-
*** In the panel multicolor HLA-DR was used. In multicolor integrin panel CD29 was used instead of HLA-DR.							PBMCs	B cells	Plasmablasts	CD38+CD27+
							PBMCs	DCs and monocytes	CD1c+ DCs	CD14-CD16-CD1c+
							PBMCs	DCs and monocytes	CD1c-CD141- DCs	CD14-CD16-CD1c-CD141-
							PBMCs	DCs and monocytes	CD1c-CD141+ DCs	CD14-CD16-CD1c-CD141+
							PBMCs	DCs and monocytes	CD123+ pDCs	CD14-CD16-CD123+
							PBMCs	DCs and monocytes	Classical monocytes	CD14+CD16-
							PBMCs	DCs and monocytes	Intermediate monocytes	CD14+CD16+
							PBMCs	DCs and monocytes	Non-classical monocytes	CD14-CD16+
							PBMCs	DCs and monocytes	CD14dimCD16dim	CD14dimCD16dim
							PBMCs	NKs and ILCs	Early NKs	CD16+CD56+
							PBMCs	NKs and ILCs	Mature NKs	CD16+CD56dim
							PBMCs	NKs and ILCs	Terminal NKs	CD16+CD56-
							PBMCs	NKs and ILCs	ILCs	CD127+

## Sheet: Supplementary Table 4
Supplementary Table 4
The median fluorescence intensity of the positive integrin populations on mucosal and circulating cells in UC patients prior to and after 14 weeks of vedolizumab treatment in Cytek data
This table provides additional detailed data pertaining to Figure 2, Extended Data Figure 3, and Extended Data Figure4
VDZ, vedolizumab; pre-VDZ, study time point of 2 weeks prior to start of vedolizumab treatment; post-VDZ, study time point of 14 weeks after the start of vedolizumab treatment; PGA, Physician global assessment
sample	tissue	technique	timepoint	response by PGA	Non classical monocytes b7+	Intermediate monocytes b7+	Classical monocytes b7+	CD14dCD16d b7+	CD1c-CD141- DCs b7+	CD1c-CD141+ DCs b7+	CD123+ pDCs b7+	All DCs b7+	All monocytes b7+	CD1c+ DCs b7+	Non classical monocytes aX+	Intermediate monocytes aX+	Classical monocytes aX+	CD14dCD16d aX+	CD1c-CD141- DCs aX+	CD1c-CD141+ DCs aX+	CD123+ pDCs aX+	All DCs aX+	All monocytes aX+	CD1c+ DCs aX+	Non classical monocytes aE+	Intermediate monocytes aE+	Classical monocytes aE+	CD14dCD16d aE+	CD1c-CD141- DCs aE+	CD1c-CD141+ DCs aE+	CD123+ pDCs aE+	All DCs aE+	All monocytes aE+	CD1c+ DCs aE+	Non classical monocytes b2+	Intermediate monocytes b2+	Classical monocytes b2+	CD14dCD16d b2+	CD1c-CD141- DCs b2+	CD1c-CD141+ DCs b2+	CD123+ pDCs b2+	All DCs b2+	All monocytes b2+	CD1c+ DCs b2+	Non classical monocytes b1+	Intermediate monocytes b1+	Classical monocytes b1+	CD14dCD16d b1+	CD1c-CD141- DCs b1+
1	PBMCs	Cytek	post-VDZ	no	19861	35432	60644	32459	38770	35640	0	39203	58893	40692	26232	33443	18136	12382	8306	6996	0	8090	18660	7965	0	0	16266	135779	0	0	0	135779	76022	135779	55696	99763	143732	45770	14035	11651	0	14206	139896	13969	25339	51278	53995	29919	25320
2	PBMCs	Cytek	pre-VDZ	no	17583	35291	47756	38996	28687	46697	0	42238	46303	42953	20291	23969	12826	12366	12659	7209	0	12103	13318	11814	0	0	18718	0	0	0	0	0	18718	0	61592	113115	142251	82179	49972	15962	0	48584	139349	49138	30535	62024	51870	36978	18601
3	PBMCs	Cytek	pre-VDZ	yes	22554	47006	48820	29594	27777	37974	0	36719	48129	37092	9685	15773	9190	7608	10443	5900	7164	8139	9230	8146	0	0	42198	0	0	0	0	0	42198	0	77370	143069	141067	111520	52565	38873	11387	51468	139932	54689	21042	54580	41673	29206	14894
4	PBMCs	Cytek	post-VDZ	yes	13761	32903	46364	19045	33596	30380	0	36815	44231	36815	16091	18716	12512	8278	10828	7367	8468	9562	12765	11017	0	0	13674	0	0	0	0	0	13674	0	40198	90621	121911	40663	39355	41697	9606	36074	118064	48129	19076	49327	46723	16039	18246
5	PBMCs	Cytek	pre-VDZ	yes	19951	39969	41227	47829	38205	42797	0	37625	41077	37453	16056	21136	11623	30276	8509	12795	7598	11251	11710	12726	0	0	77951	0	0	0	0	0	77951	0	61944	123913	118609	59851	48194	27793	10434	35513	118432	38227	28409	49789	40684	19226	15734
6	PBMCs	Cytek	pre-VDZ	yes	16850	36565	37909	27068	67497	52422	0	33183	37869	32319	13703	16983	9540	7211	7173	11727	0	9154	9549	9863	0	0	26895	0	0	0	0	0	26895	0	62957	132103	111332	68505	41188	63200	0	44156	111207	48436	23388	42426	38136	22192	26870
7	PBMCs	Cytek	pre-VDZ	yes	16650	31244	43280	30322	37505	0	0	32861	42884	32861	17683	22256	12229	13532	12344	6188	7090	13743	12322	15992	0	0	21534	0	0	0	0	0	21534	0	48733	109353	117400	60728	45026	24603	11323	39367	116683	45886	28536	69109	73654	19597	21609
8	PBMCs	Cytek	post-VDZ	yes	10874	28878	37933	18695	54305	48736	28797	37792	36115	37792	12161	14793	8835	0	8024	17303	0	9799	9229	13578	0	223831	198959	0	0	0	0	0	223831	0	62757	159158	195927	60192	57952	63267	17068	44728	188084	66543	33523	103716	104639	27701	24936
9	PBMCs	Cytek	post-VDZ	no	19114	52544	62353	33895	32835	32639	0	37233	60943	40088	14890	22808	12555	9397	11342	9188	7881	10030	12649	10030	0	0	20103	0	0	0	0	0	20103	0	56468	149501	159993	77478	63454	53896	11784	57877	155335	65896	17316	59920	42199	24624	19745
10	PBMCs	Cytek	pre-VDZ	yes	17154	29330	49603	28993	0	36663	0	46492	47083	46492	26167	29080	16114	28567	14679	14561	10967	17358	17243	21775	0	0	13754	0	28782	0	0	28782	13754	0	54042	100703	142644	88848	32277	52284	15141	47374	133188	78060	17511	30363	52836	32356	14729
11	PBMCs	Cytek	post-VDZ	yes	13551	28948	47215	40904	0	36114	0	41635	44536	41635	19946	22111	15268	27819	9856	9401	7679	10073	16198	13824	0	0	15616	0	0	0	0	17077	15616	17077	40764	80874	111355	72253	25824	30893	8309	30205	105394	46363	18101	35445	45927	28222	14190
12	PBMCs	Cytek	pre-VDZ	no	17688	38679	60096	28968	40561	40040	0	41528	57595	41607	14305	18130	12251	13100	10679	8125	6983	9482	12627	11911	0	15808	23066	0	0	0	0	0	16813	0	55741	117531	163109	72651	46692	31226	13242	42861	157713	61989	27352	53364	42450	26368	27189
13	PBMCs	Cytek	post-VDZ	no	16713	43991	59775	30214	30960	35621	0	38260	57314	38730	13259	18949	12349	10029	10435	8103	7743	9161	12532	10186	0	14690	14029	0	0	0	0	16762	14359	16762	53200	131739	161142	73546	50928	25799	11808	43949	155002	56080	24563	58519	47374	28797	25136
14	PBMCs	Cytek	pre-VDZ	no	13072	38169	48490	29982	40288	32309	0	38389	47755	38351	20308	24817	15111	12724	10182	8070	7454	12035	15270	16649	0	39582	18426	0	0	19711	0	18230	18426	16750	49912	138201	162723	64184	35712	27245	11340	47015	160528	59169	26567	54435	44665	27923	20431
15	PBMCs	Cytek	pre-VDZ	no	9960	24997	39506	22311	40572	52029	62888	37004	36706	36116	9266	12018	8122	8807	6586	9641	7399	8963	8365	9935	0	74566	17549	0	0	0	16991	16991	25927	0	55669	134213	209168	117796	36028	80869	18202	32739	198199	81354	25609	76887	80721	33878	13594
16	PBMCs	Cytek	post-VDZ	yes	13512	42248	52616	27099	29217	36190	0	37755	43931	37867	10384	17630	12334	7284	9095	7323	7429	8738	11972	8652	0	27238	20685	0	0	0	0	16645	21879	16645	45890	127367	155704	96965	54498	35509	13048	45777	130875	56345	17270	52682	50028	27431	19255
17	PBMCs	Cytek	pre-VDZ	yes	13840	31088	48557	24775	36980	40644	0	41259	44784	41626	10162	16232	12170	7894	8156	8442	6787	8436	12071	9220	0	0	173782	0	0	0	0	0	173782	0	46196	99763	141291	47161	37938	56090	10872	42270	130431	57392	16698	57289	52625	23923	19407
18	PBMCs	Cytek	pre-VDZ	no	15323	37957	42931	34126	33034	40717	35930	38160	41896	44262	15543	22774	17443	11391	9481	0	8127	9481	17633	11185	16377	16203	15472	0	0	0	0	0	15829	0	49878	104329	104455	55823	52129	40816	8353	45719	103160	52436	31148	87700	78191	36126	25148
19	PBMCs	Cytek	post-VDZ	no	17409	44379	45966	32183	31280	40945	0	45567	45288	45733	10019	16595	12642	16253	6722	7627	8167	8846	12623	10181	0	0	103370	0	0	0	0	0	103370	0	59364	124791	126585	48654	49125	34960	12163	52995	124741	57386	27807	79687	62039	22335	23222
20	PBMCs	Cytek	pre-VDZ	no	19502	45430	46208	43146	32221	50037	0	48769	45259	50037	13482	17944	12329	12648	6622	9562	8195	10557	12573	11887	0	0	0	0	0	32625	0	32625	0	0	63575	138578	132664	89213	40571	50763	10076	59592	129459	63830	22753	50257	44590	32256	23931
21	PBMCs	Cytek	pre-VDZ	yes	14723	34283	49291	29909	42576	75551	28090	37872	44713	35999	13349	18346	13666	8750	7392	10471	7686	8015	13844	8750	0	21317	83911	0	0	0	0	0	40311	0	52878	122389	155649	59929	38642	47040	9050	13712	144141	57348	20181	44930	43733	28435	19817
22	PBMCs	Cytek	post-VDZ	yes	13031	27173	36614	20903	30269	42229	32755	35452	35146	35868	7985	8686	6894	73585	5855	7493	5943	6996	7066	7172	0	0	24816	0	0	0	15875	15875	24816	0	78894	157173	195620	89989	53952	54823	15478	35267	189782	68971	35917	66642	47873	29960	23684
23	PBMCs	Cytek	post-VDZ	no	12587	24447	31483	14913	37713	30837	0	39940	30331	41115	12354	13466	7618	6826	14239	13770	0	11035	7882	9921	0	0	17335	0	0	0	0	0	17335	0	79593	133788	171021	102016	78587	68859	15871	46207	166780	73625	30416	60447	61721	28986	27721
24	PBMCs	Cytek	post-VDZ	yes	17584	40053	70292	35214	30918	37341	0	36821	66021	36879	18523	25123	14709	11478	14539	7749	6876	8668	15211	9512	0	0	21429	0	0	0	0	0	21429	0	53697	110607	179523	63813	39827	31771	12188	38839	171485	49845	18954	42713	40906	20715	20700
25	PBMCs	Cytek	pre-VDZ	no	14714	31878	47498	26617	32993	41043	29441	42042	44292	43900	11804	17549	11630	7552	7394	8241	6741	7771	11804	8531	17324	0	15921	0	0	0	17297	17297	15921	0	49098	115991	138870	80499	37764	40706	9913	35160	130046	47455	20774	49180	49269	27541	16585
26	PBMCs	Cytek	post-VDZ	no	13701	33714	49541	36262	33462	37826	0	39349	41389	39572	16966	23210	14944	17938	10485	6185	8036	10826	15875	12934	0	0	18156	0	0	0	0	0	18156	0	41963	97786	129186	65978	40336	31717	7850	40521	110655	49871	18762	42439	45506	28352	15499
27	PBMCs	Cytek	pre-VDZ	no	13789	34564	47183	34236	42577	59415	0	43743	45347	50608	15572	20854	12195	10081	9366	7008	7350	9055	12713	12354	0	0	15289	0	0	0	0	0	15289	0	44052	105150	129387	72883	48903	26421	8686	33565	124600	62737	16661	38855	39574	21914	19016
28	PBMCs	Cytek	pre-VDZ	yes	19196	36593	51878	27765	29537	35032	0	37563	51624	43586	13258	14400	11020	8841	7064	7230	10116	8634	11048	10693	0	0	15144	0	0	0	0	0	15144	0	45859	95719	123983	81465	45473	25770	13317	45023	123573	50413	21011	44380	42756	22322	22758
29	PBMCs	Cytek	pre-VDZ	yes	14595	26557	33340	20888	32665	40020	0	36069	33192	36746	8946	8732	6715	0	0	12903	0	7203	6764	7203	0	0	105360	0	0	0	0	0	105360	0	94095	168527	179141	73592	61382	67459	20169	56256	178367	59194	33119	45498	47708	36150	26903
30	PBMCs	Cytek	pre-VDZ	no	20205	48731	59779	33795	33433	38400	28551	40051	57340	40853	13551	16786	12519	7896	6867	8980	7421	7912	12701	8268	0	0	57266	0	0	0	0	0	57266	0	62257	148161	162770	69749	46717	53559	11612	47217	158499	57121	31944	70724	56077	27354	18366
31	PBMCs	Cytek	pre-VDZ	yes	18329	30586	48803	32723	29393	33724	35832	36496	39565	37730	18018	20829	15687	16099	10042	7704	8479	9249	16745	10883	0	0	23179	0	0	194447	0	194447	23179	0	51140	83633	117835	68224	29191	23807	9084	20974	98592	46273	30746	60200	54433	25263	21142
32	PBMCs	Cytek	pre-VDZ	yes	20847	44434	61789	36428	45196	37610	0	38239	60966	37918	15620	22858	13344	8336	10772	7599	6772	9488	13423	9965	0	0	17314	0	0	0	0	0	17314	0	61058	119633	167565	91157	63788	39363	11499	59632	164886	66734	28274	61254	46061	29957	31684
33	PBMCs	Cytek	pre-VDZ	yes	14817	27272	43707	44302	33579	42124	0	40656	41675	41027	23799	29202	15274	13696	10669	8946	7591	8974	15910	11180	0	0	22114	0	0	0	0	0	22114	0	41880	77381	103072	46456	38314	26661	8621	29189	99646	37440	22452	43423	43823	21226	16426
34	PBMCs	Cytek	post-VDZ	yes	19336	38883	43984	42700	27165	33734	0	35821	43616	36714	29099	39059	16504	21508	15051	8885	8601	13944	16585	15477	0	0	0	0	0	0	0	0	0	0	57981	131703	135826	62995	39525	35873	11141	40869	135186	50137	22510	43097	40508	28977	16847
35	PBMCs	Cytek	pre-VDZ	yes	15024	26728	53322	20786	31890	30963	0	43148	51677	43301	17374	24430	13235	10673	14092	10603	8658	11690	13537	12605	0	0	15373	0	0	0	0	0	15373	0	45295	86393	143914	58019	40185	38961	16020	42389	140023	54142	16212	32790	46039	51279	14580
36	PBMCs	Cytek	pre-VDZ	yes	21438	34363	47586	32426	29681	39022	0	38569	46267	38569	16681	20085	14810	11655	8720	8184	7404	9099	15093	9614	383766	0	29687	0	0	0	0	0	30361	0	60233	93036	114163	56622	27920	21222	11176	32958	111899	45885	43588	68790	53249	25167	19061
37	PBMCs	Cytek	pre-VDZ	yes	14133	27734	35192	21492	0	41131	32583	38422	34477	38728	11135	13119	7669	6755	8624	14330	6544	10820	7982	11280	0	0	59703	0	0	0	25846	25846	59703	0	83516	147587	185688	86037	60221	47729	22338	48998	182776	79521	83622	123636	82929	58453	30201
38	PBMCs	Cytek	post-VDZ	yes	11644	22282	33109	16149	0	52451	0	35323	32195	35323	9156	10917	7108	6887	6733	7439	9335	8070	7320	8477	0	0	144015	0	0	0	0	0	144015	0	65280	121859	173644	71467	45923	45729	16031	43782	170296	57482	37850	77494	56275	27740	18218
39	PBMCs	Cytek	post-VDZ	no	16330	36365	40834	31818	0	0	0	34865	39721	34865	21844	22496	11472	14774	9633	0	7602	9896	11911	12049	0	0	41984	0	0	0	0	0	41984	0	64620	135655	135855	56776	37055	0	11549	41548	133898	57298	23606	34666	32828	22304	15543
40	PBMCs	Cytek	pre-VDZ	no	16938	42716	47606	26054	30108	31437	0	34173	46742	35618	8989	8414	7739	7279	9700	5807	6055	6961	7793	6079	0	0	0	0	0	0	21296	21296	0	0	116574	299986	288400	133618	148442	84896	23485	85393	285964	96449	31708	54029	41035	31350	29859
41	PBMCs	Cytek	pre-VDZ	no	15218	0	41399	30618	33864	33143	0	33143	40798	33143	9632	0	6773	6302	6368	7076	0	7076	6772	7439	0	0	19984	0	0	0	0	0	19984	0	111161	0	256679	186317	131437	106495	19805	89645	254190	117286	30825	0	41281	36563	31349
42	PBMCs	Cytek	pre-VDZ	yes	14696	35340	41242	14481	27911	64916	0	41359	40965	50614	18100	18201	7789	6260	6835	12932	0	8529	7854	12772	0	0	14438	0	0	0	0	0	14438	0	99183	196766	220964	126696	60249	103275	14415	48427	219648	75708	37214	69184	52768	28771	22307
43	PBMCs	Cytek	pre-VDZ	yes	17057	41616	64113	30236	28105	37928	0	39574	61758	40320	14659	25426	13687	10602	10238	8742	6839	10309	13800	10819	0	0	29827	13751	0	0	0	0	29318	0	51620	112053	161754	65492	75566	49390	14111	58990	158424	60072	15161	35887	44533	30313	21986
44	PBMCs	Cytek	post-VDZ	yes	15713	46350	56151	37928	32113	39343	0	40494	55205	40740	19112	22634	14300	14998	10256	7150	7040	12151	14385	14032	0	0	17056	15441	29645	0	0	29645	16600	0	45423	136856	146069	81811	37142	29440	12320	46221	143760	57882	18852	29132	38557	23787	16709
45	PBMCs	Cytek	pre-VDZ	yes	21128	32752	44748	36815	40020	0	0	38121	41195	38121	11839	20771	11149	11166	7721	0	0	7697	11459	7447	0	0	14314	0	0	0	0	0	14314	0	62966	95403	137248	102441	43917	52280	9993	43917	129433	52179	17821	29171	39813	35355	17908
46	PBMCs	Cytek	post-VDZ	yes	15454	32807	42310	29664	39292	30423	0	37199	38876	37503	15863	21281	15909	11324	9253	7580	8430	9109	16174	9934	0	0	0	0	0	0	0	0	0	0	45049	86123	103036	38762	29323	23744	9355	23824	96951	48049	23805	64744	52638	26429	18931
47	PBMCs	Cytek	pre-VDZ	yes	34901	58181	64621	38550	37032	41349	29322	39268	64372	39554	17503	23383	15148	12021	10997	9036	8201	10618	15200	12273	0	0	19142	0	0	0	0	0	19142	0	99824	169442	171473	90506	63572	73336	43839	68402	171110	72751	33893	61570	52209	34257	16519
48	PBMCs	Cytek	post-VDZ	no	15573	41764	47287	30228	29252	28736	0	31503	46616	33393	13824	22106	11725	8155	9774	6128	8208	9068	11855	10312	0	0	19440	0	0	0	0	0	19440	0	54561	128602	157406	86099	68881	50777	12588	33593	155053	62247	23663	42920	42638	28352	16437
sample	tissue	technique	timepoint	response by PGA	Macrophages (CD14hi) b7+	CD123+ pDCs b7+	CD103+ CD11c+ DCs b7+	DC like cells b7+	B cells b7+	Naive B cells b7+	CD38- IgD+ non-switched B cells b7+	Memory B cells b7+	Transitional B cells b7+	Plasmablasts b7+	gd T cells b7+	CD4+CD56+ T cells b7+	Memory CD4+ T cells b7+	CD4+ T cells b7+	Tregs b7+	Effector memory CD4+ T cells b7+	Naive CD4+ T cells b7+	CD4+CD8+ T cells b7+	Naive CD8+ T cells b7+	Memory CD8+ T cells b7+	Effector CD8+ T cells b7+	CD45RA+CD8+ T cells b7+	CD8+ T cells b7+	ILCs b7+	NK cells b7+	CD4-CD8- T cells b7+	Macrophages (CD14hi) aX+	CD123+ pDCs aX+	CD103+ CD11c+ DCs aX+	DC like cells aX+	B cells aX+	Naive B cells aX+	CD38- IgD+ non-switched B cells aX+	Memory B cells aX+	Transitional B cells aX+	Plasmablasts aX+	gd T cells aX+	CD4+CD56+ T cells aX+	Memory CD4+ T cells aX+	CD4+ T cells aX+	Tregs aX+	Effector memory CD4+ T cells aX+	Naive CD4+ T cells aX+	CD4+CD8+ T cells aX+	Naive CD8+ T cells aX+
1	mucosa	Cytek	pre-VDZ	yes	20487	15322	129220	19074	19012	13114	15727	14615	20365	15767	19521	23516	17029	17055	14056	17599	18108	18163	30457	15909	16421	18154	16480	0	16155	17270	0	0	0	0	103998	186420	0	0	103307	0	0	0	0	114331	123554	0	105108	0	207159
2	mucosa	Cytek	post-VDZ	yes	19786	0	41913	19747	18304	0	0	13281	22933	17783	25374	0	17309	17384	0	19019	21577	21747	17637	23484	19434	29120	20238	0	16989	40516	0	0	0	0	0	0	0	0	0	0	0	0	0	96552	0	0	96552	0	0
3	mucosa	Cytek	pre-VDZ	yes	15411	0	26278	22427	15824	12333	14071	14120	16843	15745	20185	12148	14991	15988	0	16678	0	25088	17550	17837	16541	14270	16179	0	17259	0	0	0	95017	0	185638	0	185638	0	0	0	0	0	0	277005	322573	0	231803	0	0
4	mucosa	Cytek	post-VDZ	yes	11966	0	33570	16082	21876	0	12571	37485	22546	20371	19507	0	21490	21177	0	17068	22502	31508	30884	20762	20237	21660	20942	17152	15946	22167	0	0	0	107054	0	0	0	0	0	0	0	0	0	0	0	0	0	0	0
5	mucosa	Cytek	pre-VDZ	no	0	0	19926	31383	19632	0	0	0	19312	19679	21850	0	17334	18442	0	21195	33830	22089	25974	23537	21694	21572	21968	29677	26808	25141	0	0	0	0	5825601	0	0	0	0	0	0	0	187787	187787	0	0	0	0	0
6	mucosa	Cytek	pre-VDZ	no	21300	0	63388	19003	19857	0	29950	14712	19898	19475	20988	28240	16642	16396	0	14087	21183	25221	32055	16754	16949	17818	17337	0	30751	29609	0	0	0	218467	0	0	0	0	0	0	0	0	0	247621	247621	0	0	0	0
7	mucosa	Cytek	pre-VDZ	no	18583	0	44772	15632	15874	12315	13227	14327	16126	19321	16909	0	14811	15638	21942	16412	19351	18150	17383	16886	16317	16866	16710	18464	18156	17568	137143	0	146962	0	0	0	0	0	0	0	0	142303	0	101224	0	0	0	0	0
8	mucosa	Cytek	post-VDZ	no	0	0	0	15576	16006	0	15305	0	14213	27110	31684	0	20948	20948	0	0	0	19132	0	15376	12496	19904	14777	0	14862	13821	0	0	0	0	184932	0	0	0	0	184932	0	0	0	0	0	0	0	0	0
9	mucosa	Cytek	pre-VDZ	yes	17491	11992	22873	15836	17276	13101	13672	14006	19895	20768	21516	0	18211	18138	15587	18036	16935	20110	20904	21550	19617	17947	19989	59055	24561	33078	137494	0	0	0	95782	0	95782	0	0	0	0	0	0	103331	0	257541	101827	0	101337
10	mucosa	Cytek	post-VDZ	yes	15465	0	25626	13751	16185	32048	12836	14602	16734	16317	25162	0	20131	20241	16028	20185	24083	22267	28776	25516	22257	26314	22807	27691	22533	15077	0	0	0	0	0	0	0	0	0	0	0	0	0	119686	0	119686	0	0	0
11	mucosa	Cytek	post-VDZ	yes	23245	0	26965	14787	16177	0	16033	13433	16370	16216	30695	0	20160	20298	0	20432	24645	21753	25380	27560	23449	18511	24323	45521	34122	14952	0	0	0	254060	0	0	0	0	0	0	0	0	0	167960	0	134037	0	0	0
12	mucosa	Cytek	post-VDZ	yes	25376	14272	190571	26469	24250	14127	15638	15533	26369	20159	35710	13356	26180	24120	13465	22155	24024	35654	44641	49277	39984	33073	42139	21629	29790	20016	0	0	0	0	111665	0	105275	0	111850	0	0	0	0	140865	0	140865	0	0	0
13	mucosa	Cytek	pre-VDZ	yes	23246	17234	46103	22184	19690	13575	14739	14435	21197	16483	15517	16366	15060	14420	15058	14179	13333	15915	16372	14854	15217	15657	15375	0	14794	15200	3641315	0	0	0	116999	0	117644	0	116353	0	0	0	0	141534	0	0	141534	0	0
14	mucosa	Cytek	post-VDZ	yes	15745	11848	40836	18386	20310	12503	761763	13725	23770	19787	24187	0	19558	19234	0	18871	14486	20012	17837	20791	21045	20383	20962	33540	30858	26976	0	0	98210	0	2021490	0	2021490	0	0	0	0	0	167886	149453	0	131019	0	0	0
15	mucosa	Cytek	pre-VDZ	yes	21930	0	20517	22731	18591	13530	14106	13433	20263	15439	28516	0	16228	16338	0	19770	24197	18705	17989	19401	18450	18518	18601	12076	44492	0	111768	0	0	123666	0	0	0	0	0	0	0	0	0	112142	0	0	0	0	0
16	mucosa	Cytek	pre-VDZ	no	0	0	30966	19461	23855	14569	16412	15833	33098	22903	21412	0	18668	19217	12629	19960	26467	20876	24525	22987	20627	21191	21040	53124	21076	24382	172470	0	96742	378543	0	0	0	0	0	0	0	0	109268	105961	0	0	102655	135417	0
17	mucosa	Cytek	post-VDZ	no	0	18820	24679	16851	29472	26075	23140	13611	45111	28350	23482	153533	19622	19938	0	20548	30718	21875	25361	24001	21724	22738	22313	45826	21664	21282	0	0	98643	0	0	0	0	0	0	0	0	414729	0	99705	274377	0	92662	0	0
18	mucosa	Cytek	pre-VDZ	no	22897	15668	18052	20260	18380	13459	14942	15188	21180	17761	16840	15578	15367	14896	14852	14648	15729	15776	16672	16489	17270	17271	16932	0	15075	14660	0	120701	0	0	114062	107530	144591	0	114062	0	0	0	349675	447400	0	742897	116735	0	0
19	mucosa	Cytek	pre-VDZ	no	0	0	20216	16584	16350	13689	15376	14056	16376	16741	19903	0	16658	16952	0	18792	18683	16724	20117	21755	19299	18940	19603	36399	16829	23316	0	0	0	0	0	0	0	0	0	0	0	0	0	0	0	0	0	0	0
20	mucosa	Cytek	post-VDZ	no	23357	0	48680	28435	22842	14114	20911	18177	19881	23940	31120	17654	18880	19123	16577	18566	24423	23614	37978	26168	23103	26657	24204	23847	26477	17537	0	0	0	0	121008	0	0	0	0	121008	0	0	0	123005	0	648177	111272	0	0
21	mucosa	Cytek	pre-VDZ	yes	0	0	78364	14672	18526	0	20116	12696	26292	17642	16052	13457	17963	17964	34009	16626	20419	20069	19494	21283	19069	19662	19588	0	21162	0	0	0	0	0	0	0	0	0	0	0	0	0	103467	103467	0	0	276068	101895	0
22	mucosa	Cytek	pre-VDZ	yes	0	0	31772	16678	18609	0	0	13919	19345	18489	22964	19129	18192	18219	12728	16136	22529	18250	24066	21842	20059	21225	20280	40463	22533	13996	0	0	0	0	0	0	0	0	0	0	0	0	0	0	0	0	0	0	0
23	mucosa	Cytek	post-VDZ	yes	25267	15025	144564	27803	19534	13549	15109	14110	27695	18884	17028	16173	16592	14698	14780	14440	13363	17513	16558	18156	19180	15738	18918	0	19267	14913	0	0	0	0	125307	93629	483607	0	122012	1237587	0	0	0	360344	0	359594	360344	0	0
24	mucosa	Cytek	post-VDZ	yes	0	0	123448	0	22424	37856	15172	15950	24074	22932	24020	14810	19451	20017	0	18235	26162	21828	22294	21379	19244	20699	19804	32259	17713	16996	0	0	120786	0	0	0	0	0	0	0	0	0	0	0	0	0	0	155737	0
25	mucosa	Cytek	pre-VDZ	yes	128000	0	132867	16374	16059	13671	15114	14564	20854	21062	12463	0	15876	16409	12159	18739	23264	15687	12414	24353	17931	21078	17975	0	0	0	267392	0	255012	292870	0	0	0	0	0	0	0	0	0	108218	0	0	116966	0	116000
26	mucosa	Cytek	post-VDZ	yes	22080	0	179138	27609	42562	19212	30494	13873	46270	18972	18776	0	17427	15753	13576	15850	15408	21039	39447	23624	19334	12470	19657	19337	19410	14898	0	0	0	0	127112	0	0	0	127112	0	0	0	0	411938	0	411938	0	0	0
27	mucosa	Cytek	post-VDZ	no	16828	0	42220	17558	23376	0	0	0	23353	22358	25973	0	19066	19027	0	15077	17197	19841	28142	24013	19986	22462	21089	37902	15334	0	2673998	0	0	0	1956474	0	0	0	0	1956474	94345	0	0	123569	0	0	123569	0	0
28	mucosa	Cytek	post-VDZ	no	0	0	15485	24012	22211	0	0	21552	26434	21821	25103	0	18401	18401	0	12019	23256	19872	23803	22175	18553	19910	19095	70966	15128	24979	126208	0	103432	0	0	0	0	0	0	0	0	0	0	244847	0	488804	213406	0	0
29	mucosa	Cytek	pre-VDZ	yes	16828	0	34715	23705	19460	0	0	13475	22146	18026	30754	0	19973	21230	25387	25172	23036	28999	21078	26023	25069	22978	25107	0	26656	21727	0	0	0	0	174160	0	174160	0	0	0	0	0	0	116439	0	108033	124846	0	0
[truncated: 228 more columns]

## Sheet: Supplementary Table 5
Supplementary Table 5
The average log2 fold change in the expression of genes encoding integrins on mucosal and circulating cells in UC patients prior to and after 14 weeks of vedolizumab treatment in scRNAseq data
This table provides additional detailed data pertaining to Figure 2, Extended Data Figure 3, and Extended Data Figure 4
VDZ, vedolizumab; pre-VDZ, study time point of 2 weeks prior to start of vedolizumab treatment; post-VDZ, study time point of 14 weeks after the start of vedolizumab treatment; PGA, Physician global assessment
tissue	technique	integrin	cell type	change (increase)	p_val	avg_log2FC	pct.1	pct.2	p_val_adj using bonferroni	p_val_adj using Benjamini-Hochberg	condition
PBMCs	scRNAseq	ITGB7	ASDC	responders	0.000881026113519799	-0.602664502454615	0	0.37	1	0.0140964178163168	pre-VDZ, non-responders vs responders (responders as reference)
PBMCs	scRNAseq	ITGAL	B memory	non-responders	0.00156134455657719	0.0829375993341901	0.09	0.068	1	0.024981512905235	pre-VDZ, non-responders vs responders (responders as reference)
PBMCs	scRNAseq	ITGB1	CD14 Mono	responders	8.28552697601385e-06	-0.0888774460341666	0.684	0.72	0.277880003721553	2.20947386027036e-05	pre-VDZ, non-responders vs responders (responders as reference)
PBMCs	scRNAseq	ITGB2	CD14 Mono	responders	2.91381287994682e-24	-0.0818504132670912	0.748	0.826	9.77234563676566e-20	4.66210060791492e-23	pre-VDZ, non-responders vs responders (responders as reference)
PBMCs	scRNAseq	ITGAM	CD14 Mono	responders	8.74992554472081e-07	-0.0547378740544562	0.4	0.448	0.0293455002918847	3.49997021788833e-06	pre-VDZ, non-responders vs responders (responders as reference)
PBMCs	scRNAseq	ITGA4	CD14 Mono	non-responders	2.4524143318241e-06	0.0788261623650952	0.286	0.264	0.0822490718607168	7.84772586183713e-06	pre-VDZ, non-responders vs responders (responders as reference)
PBMCs	scRNAseq	ITGAE	CD14 Mono	responders	2.64276934620161e-05	-0.0515101936806302	0.185	0.213	0.886331983329096	6.04061564846082e-05	pre-VDZ, non-responders vs responders (responders as reference)
PBMCs	scRNAseq	ITGAL	CD14 Mono	non-responders	0.00152304429392974	0.0431728238645343	0.198	0.178	1	0.00270763430031953	pre-VDZ, non-responders vs responders (responders as reference)
PBMCs	scRNAseq	ITGAX	CD14 Mono	non-responders	1.83424455408997e-09	0.102821278251043	0.78	0.791	6.15168938550695e-05	9.7826376218132e-09	pre-VDZ, non-responders vs responders (responders as reference)
PBMCs	scRNAseq	PECAM1	CD14 Mono	responders	1.04375786247964e-11	-0.111692300717413	0.514	0.578	3.50055511918422e-07	8.35006289983712e-11	pre-VDZ, non-responders vs responders (responders as reference)
PBMCs	scRNAseq	ICAM1	CD14 Mono	responders	0.000101852445156453	-0.0916346972636283	0.398	0.423	1	0.000203704890312906	pre-VDZ, non-responders vs responders (responders as reference)
PBMCs	scRNAseq	ITGAX	CD16 Mono	non-responders	2.67693422772111e-08	0.300604799909806	0.71	0.628	0.000897790201293105	4.28309476435377e-07	pre-VDZ, non-responders vs responders (responders as reference)
PBMCs	scRNAseq	ICAM1	CD16 Mono	responders	3.40096047321918e-05	-0.18728418161756	0.248	0.335	1	0.000272076837857534	pre-VDZ, non-responders vs responders (responders as reference)
PBMCs	scRNAseq	ITGB1	CD4 CTL	responders	0.000570744572656952	-0.525432201496434	0.654	0.707	1	0.00913191316251124	pre-VDZ, non-responders vs responders (responders as reference)
PBMCs	scRNAseq	ITGB2	CD4 CTL	responders	0.00268738172845457	-0.304668391292518	0.394	0.524	1	0.0155685553682937	pre-VDZ, non-responders vs responders (responders as reference)
PBMCs	scRNAseq	ITGA4	CD4 CTL	responders	0.00291910413155507	-0.361266242837863	0.375	0.543	1	0.0155685553682937	pre-VDZ, non-responders vs responders (responders as reference)
PBMCs	scRNAseq	ITGB1	CD4 Naive	responders	2.40520453586252e-05	-0.0500631437183301	0.098	0.132	0.80665749723757	9.62081814345006e-05	pre-VDZ, non-responders vs responders (responders as reference)
PBMCs	scRNAseq	ITGB2	CD4 Naive	responders	9.96761259059546e-13	-0.0995410361812807	0.152	0.216	3.34293791063391e-08	1.59481801449527e-11	pre-VDZ, non-responders vs responders (responders as reference)
PBMCs	scRNAseq	ITGA4	CD4 Naive	responders	5.65488329544546e-06	-0.0686942592136268	0.144	0.186	0.18965347596265	3.01593775757091e-05	pre-VDZ, non-responders vs responders (responders as reference)
PBMCs	scRNAseq	ITGB7	CD4 Naive	responders	1.36168998448389e-06	-0.0378298009127867	0.039	0.066	0.0456683586996208	1.08935198758711e-05	pre-VDZ, non-responders vs responders (responders as reference)
PBMCs	scRNAseq	ITGAE	CD4 Naive	responders	0.00299626442544676	-0.0278367168323793	0.05	0.069	1	0.00958804616142965	pre-VDZ, non-responders vs responders (responders as reference)
PBMCs	scRNAseq	ITGB1	CD4 TCM	responders	6.61263617202105e-05	-0.0855839681644615	0.407	0.45	1	0.00105802178752337	pre-VDZ, non-responders vs responders (responders as reference)
PBMCs	scRNAseq	ITGB1	CD8 Naive	responders	1.30622802844767e-05	-0.066856262335215	0.078	0.137	0.43808275618078	0.000104498242275814	pre-VDZ, non-responders vs responders (responders as reference)
PBMCs	scRNAseq	ITGB2	CD8 Naive	responders	8.08774639976452e-08	-0.141872359560335	0.142	0.242	0.00271246838755303	1.29403942396232e-06	pre-VDZ, non-responders vs responders (responders as reference)
PBMCs	scRNAseq	ITGA4	CD8 Naive	responders	4.3254031678126e-05	-0.114720269380831	0.196	0.279	1	0.000230688168950005	pre-VDZ, non-responders vs responders (responders as reference)
PBMCs	scRNAseq	ITGB7	CD8 Naive	responders	0.00699928057202577	-0.0309260538990285	0.05	0.078	1	0.0279971222881031	pre-VDZ, non-responders vs responders (responders as reference)
PBMCs	scRNAseq	ITGB1	CD8 TEM	responders	6.00771896024768e-21	-0.303372181108637	0.351	0.462	2.01486878488787e-16	9.61235033639628e-20	pre-VDZ, non-responders vs responders (responders as reference)
PBMCs	scRNAseq	ITGB2	CD8 TEM	responders	7.09955615613305e-15	-0.190229401688872	0.332	0.436	2.3810491436439e-10	2.83982246245322e-14	pre-VDZ, non-responders vs responders (responders as reference)
PBMCs	scRNAseq	ITGA4	CD8 TEM	responders	4.24698469929851e-15	-0.20896835244798	0.304	0.399	1.42435372845073e-10	2.26505850629254e-14	pre-VDZ, non-responders vs responders (responders as reference)
PBMCs	scRNAseq	ITGB7	CD8 TEM	responders	2.77257128466805e-08	-0.0789233791074505	0.07	0.12	0.00092986495745197	8.87222811093775e-08	pre-VDZ, non-responders vs responders (responders as reference)
PBMCs	scRNAseq	ITGAE	CD8 TEM	responders	0.00222846323925551	-0.0394946747222163	0.054	0.078	1	0.0059425686380147	pre-VDZ, non-responders vs responders (responders as reference)
PBMCs	scRNAseq	ITGAL	CD8 TEM	responders	6.69981128286528e-16	-0.182996026381009	0.246	0.339	2.24698270804736e-11	5.35984902629223e-15	pre-VDZ, non-responders vs responders (responders as reference)
PBMCs	scRNAseq	ITGB1	cDC2	responders	0.00325660102378447	-0.313885095931389	0.689	0.767	1	0.0180336275819382	pre-VDZ, non-responders vs responders (responders as reference)
PBMCs	scRNAseq	ITGB2	cDC2	responders	0.000139019274187786	-0.281024323365636	0.783	0.903	1	0.00222430838700458	pre-VDZ, non-responders vs responders (responders as reference)
PBMCs	scRNAseq	ITGAE	cDC2	responders	0.00751473675024663	-0.163870555579793	0.283	0.415	1	0.0240471576007892	pre-VDZ, non-responders vs responders (responders as reference)
PBMCs	scRNAseq	ITGAX	cDC2	responders	0.00740050831058307	-0.272217704909394	0.736	0.837	1	0.0240471576007892	pre-VDZ, non-responders vs responders (responders as reference)
PBMCs	scRNAseq	ICAM1	cDC2	responders	0.00338130517161341	-0.264620108075598	0.236	0.353	1	0.0180336275819382	pre-VDZ, non-responders vs responders (responders as reference)
PBMCs	scRNAseq	ITGA4	HSPC	non-responders	0.00368344888253182	0.505375154420271	0.361	0.135	1	0.0294675910602545	pre-VDZ, non-responders vs responders (responders as reference)
PBMCs	scRNAseq	ICAM1	HSPC	non-responders	0.00255713589308614	0.302532613666694	0.167	0.029	1	0.0294675910602545	pre-VDZ, non-responders vs responders (responders as reference)
PBMCs	scRNAseq	ITGB1	NK	responders	5.97053509488638e-06	-0.136406896658204	0.395	0.491	0.200239806012299	1.91057123036364e-05	pre-VDZ, non-responders vs responders (responders as reference)
PBMCs	scRNAseq	ITGB2	NK	responders	2.95044159693793e-11	-0.24435882016342	0.574	0.664	9.89519102781043e-07	1.57356885170023e-10	pre-VDZ, non-responders vs responders (responders as reference)
PBMCs	scRNAseq	ITGAM	NK	responders	2.04008324461906e-05	-0.112847259505829	0.227	0.307	0.684203118580341	5.44022198565083e-05	pre-VDZ, non-responders vs responders (responders as reference)
PBMCs	scRNAseq	ITGA4	NK	responders	0.00356054006196689	-0.0973825130240562	0.344	0.407	1	0.00712108012393378	pre-VDZ, non-responders vs responders (responders as reference)
PBMCs	scRNAseq	ITGB7	NK	responders	1.23761565124215e-06	-0.106661315958509	0.1	0.156	0.0415071537113593	4.95046260496861e-06	pre-VDZ, non-responders vs responders (responders as reference)
PBMCs	scRNAseq	ITGAL	NK	responders	5.62143233146186e-12	-0.217465798115129	0.344	0.447	1.88531597532568e-07	4.49714586516949e-11	pre-VDZ, non-responders vs responders (responders as reference)
PBMCs	scRNAseq	ITGAX	NK	responders	0.0068101577960607	-0.0729298395841539	0.139	0.181	1	0.0121069471929968	pre-VDZ, non-responders vs responders (responders as reference)
PBMCs	scRNAseq	PECAM1	NK	responders	0.00214103784093015	-0.000653406038214496	0.046	0.037	1	0.00489380077926892	pre-VDZ, non-responders vs responders (responders as reference)
PBMCs	scRNAseq	ICAM1	NK	responders	4.35263626940151e-17	-0.246795075881843	0.124	0.246	1.45978715203188e-12	6.96421803104241e-16	pre-VDZ, non-responders vs responders (responders as reference)
PBMCs	scRNAseq	ITGB7	pDC	responders	0.00236743521129358	-0.167944637314072	0	0.111	1	0.0378789633806974	pre-VDZ, non-responders vs responders (responders as reference)
PBMCs	scRNAseq	ITGAX	Treg	responders	1.8223562018642e-06	-0.00920091554862631	0.002	0.013	0.0611181822981216	2.91576992298272e-05	pre-VDZ, non-responders vs responders (responders as reference)
PBMCs	scRNAseq	ITGB7	B memory	responders	6.92315069505952e-05	-0.0476467094574089	0.062	0.123	1	0.00110770411120952	post-VDZ, non-responders vs responders (responders as reference)
PBMCs	scRNAseq	ITGA4	B naive	responders	8.57984381829217e-07	-0.216014706947444	0.182	0.29	0.0287750801977883	1.37277501092675e-05	post-VDZ, non-responders vs responders (responders as reference)
PBMCs	scRNAseq	ITGB1	CD14 Mono	responders	4.95656938816773e-16	-0.242746811079955	0.744	0.768	1.66233424140369e-11	7.93051102106838e-15	post-VDZ, non-responders vs responders (responders as reference)
PBMCs	scRNAseq	ITGB2	CD14 Mono	non-responders	1.73738361160512e-09	0.139677253415642	0.826	0.833	5.82683715660126e-05	1.3899068892841e-08	post-VDZ, non-responders vs responders (responders as reference)
PBMCs	scRNAseq	ITGAM	CD14 Mono	non-responders	0.0110953229370765	0.0689878541086495	0.447	0.415	1	0.0443812917483059	post-VDZ, non-responders vs responders (responders as reference)
PBMCs	scRNAseq	ITGAX	CD14 Mono	responders	0.00103590667439927	-0.109381042223488	0.816	0.839	1	0.00552483559679612	post-VDZ, non-responders vs responders (responders as reference)
PBMCs	scRNAseq	ITGB1	CD16 Mono	responders	0.00246580038185098	-0.104843629917371	0.792	0.762	1	0.0197264030548079	post-VDZ, non-responders vs responders (responders as reference)
PBMCs	scRNAseq	ITGB2	CD16 Mono	non-responders	4.29381356574832e-12	0.373878736420383	0.907	0.809	1.44005919368067e-07	6.87010170519731e-11	post-VDZ, non-responders vs responders (responders as reference)
PBMCs	scRNAseq	ITGB1	CD4 TCM	responders	0.000296894603366521	-0.113626160907073	0.407	0.448	1	0.00237515682693217	post-VDZ, non-responders vs responders (responders as reference)
PBMCs	scRNAseq	ITGB2	CD4 TCM	responders	6.71752105855857e-05	-0.0685698457541186	0.226	0.267	1	0.00107480336936937	post-VDZ, non-responders vs responders (responders as reference)
PBMCs	scRNAseq	PECAM1	CD4 TCM	non-responders	0.00751557954516585	0.0148661195960122	0.026	0.016	1	0.0400830909075512	post-VDZ, non-responders vs responders (responders as reference)
PBMCs	scRNAseq	ITGA4	CD4 TEM	responders	0.000298756136597242	-0.151989213684377	0.24	0.368	1	0.00478009818555588	post-VDZ, non-responders vs responders (responders as reference)
PBMCs	scRNAseq	ITGAL	CD4 TEM	responders	0.00153101632338044	-0.152964626897562	0.099	0.187	1	0.0122481305870435	post-VDZ, non-responders vs responders (responders as reference)
PBMCs	scRNAseq	ITGA3	CD8 Naive	non-responders	0.011424192143328	0.00800387651181994	0.006	0	1	0.045696768573312	post-VDZ, non-responders vs responders (responders as reference)
PBMCs	scRNAseq	ITGA4	CD8 Naive	responders	0.00695066950137099	-0.0982033608327582	0.259	0.281	1	0.0370702373406453	post-VDZ, non-responders vs responders (responders as reference)
PBMCs	scRNAseq	ITGB7	CD8 Naive	responders	0.00527047444445719	-0.0538174452941289	0.049	0.084	1	0.0370702373406453	post-VDZ, non-responders vs responders (responders as reference)
PBMCs	scRNAseq	ITGAL	CD8 Naive	responders	0.00482677645561744	-0.0694884593758174	0.082	0.13	1	0.0370702373406453	post-VDZ, non-responders vs responders (responders as reference)
PBMCs	scRNAseq	ITGB1	CD8 TEM	responders	1.96815970556847e-05	-0.134605556517402	0.461	0.505	0.660081402053553	7.87263882227387e-05	post-VDZ, non-responders vs responders (responders as reference)
PBMCs	scRNAseq	ITGB2	CD8 TEM	responders	2.13584899429139e-10	-0.158712890022369	0.401	0.482	7.16321035705445e-06	1.13911946362207e-09	post-VDZ, non-responders vs responders (responders as reference)
PBMCs	scRNAseq	ITGA4	CD8 TEM	responders	2.76627178924051e-14	-0.192571492380304	0.367	0.467	9.27752232675481e-10	2.2130174313924e-13	post-VDZ, non-responders vs responders (responders as reference)
PBMCs	scRNAseq	ITGAE	CD8 TEM	responders	0.00559541566664976	-0.0369114613745105	0.063	0.087	1	0.0149211084443994	post-VDZ, non-responders vs responders (responders as reference)
PBMCs	scRNAseq	ITGAL	CD8 TEM	responders	2.31058923642178e-24	-0.227958882462111	0.289	0.414	7.74925418111136e-20	3.69694277827484e-23	post-VDZ, non-responders vs responders (responders as reference)
PBMCs	scRNAseq	CDH1	CD8 TEM	non-responders	4.69983840830844e-05	0.00806728126811495	0.005	0	1	0.00015039482906587	post-VDZ, non-responders vs responders (responders as reference)
PBMCs	scRNAseq	ITGA4	HSPC	responders	1.29383725124019e-05	-0.574508829468622	0.059	0.232	0.433927137320934	0.000103506980099215	post-VDZ, non-responders vs responders (responders as reference)
PBMCs	scRNAseq	ITGAE	HSPC	responders	8.56566554171752e-06	-0.332063423188873	0.033	0.179	0.287275290938122	0.000103506980099215	post-VDZ, non-responders vs responders (responders as reference)
PBMCs	scRNAseq	ITGB1	NK	responders	2.55647615112317e-06	-0.159225845822017	0.42	0.474	0.0857390971563689	1.36345394726569e-05	post-VDZ, non-responders vs responders (responders as reference)
PBMCs	scRNAseq	ITGAM	NK	responders	0.00109468092161866	-0.073229405086427	0.22	0.252	1	0.00350297894917973	post-VDZ, non-responders vs responders (responders as reference)
PBMCs	scRNAseq	ITGA4	NK	responders	2.20423687220306e-08	-0.178861496392963	0.312	0.397	0.000739256962199462	1.76338949776245e-07	post-VDZ, non-responders vs responders (responders as reference)
PBMCs	scRNAseq	ITGB7	NK	responders	0.00963283632799422	-0.0525037426731776	0.102	0.132	1	0.0256875635413179	post-VDZ, non-responders vs responders (responders as reference)
PBMCs	scRNAseq	ITGAL	NK	responders	3.53288696336841e-09	-0.173510059121152	0.326	0.417	0.00011848596297745	5.65261914138945e-08	post-VDZ, non-responders vs responders (responders as reference)
PBMCs	scRNAseq	ICAM1	NK	non-responders	0.00039483068538809	0.0950256235946921	0.126	0.09	1	0.00157932274155236	post-VDZ, non-responders vs responders (responders as reference)
PBMCs	scRNAseq	ITGB1	Plasmablast	responders	3.40848663929923e-05	-0.371523363662861	0.405	0.806	1	0.000272678931143938	post-VDZ, non-responders vs responders (responders as reference)
PBMCs	scRNAseq	ITGA4	Plasmablast	responders	3.04688887438765e-05	-0.404954248456686	0.429	0.839	1	0.000272678931143938	post-VDZ, non-responders vs responders (responders as reference)
PBMCs	scRNAseq	ITGB2	B naive	after	0.000948449138141616	0.0716617612701822	0.186	0.171	1	0.0118886195638976	responders, post-VDZ vs pre-VDZ (pre-VDZ as reference)
PBMCs	scRNAseq	ITGA4	B naive	after	0.0014860774454872	0.117709224535302	0.29	0.232	1	0.0118886195638976	responders, post-VDZ vs pre-VDZ (pre-VDZ as reference)
PBMCs	scRNAseq	ITGB1	CD14 Mono	after	5.96794340313552e-40	0.302609840807714	0.768	0.72	2.00152885854359e-35	9.54870944501684e-39	responders, post-VDZ vs pre-VDZ (pre-VDZ as reference)
PBMCs	scRNAseq	ITGAM	CD14 Mono	before	0.000549690052773908	-0.0689561087270194	0.415	0.448	1	0.00175900816887651	responders, post-VDZ vs pre-VDZ (pre-VDZ as reference)
PBMCs	scRNAseq	ITGA4	CD14 Mono	after	1.77268919855043e-05	0.0826768064376702	0.302	0.264	0.594524503409844	7.09075679420173e-05	responders, post-VDZ vs pre-VDZ (pre-VDZ as reference)
PBMCs	scRNAseq	ITGAL	CD14 Mono	after	0.0030685888823987	0.0430790641158375	0.205	0.178	1	0.00818290368639653	responders, post-VDZ vs pre-VDZ (pre-VDZ as reference)
PBMCs	scRNAseq	ITGAX	CD14 Mono	after	1.62159227665408e-34	0.287154025021	0.839	0.791	5.43849617744246e-30	1.29727382132327e-33	responders, post-VDZ vs pre-VDZ (pre-VDZ as reference)
PBMCs	scRNAseq	ICAM1	CD14 Mono	after	8.10544449066451e-16	0.200880231960877	0.483	0.423	2.71840397327906e-11	4.32290372835441e-15	responders, post-VDZ vs pre-VDZ (pre-VDZ as reference)
PBMCs	scRNAseq	ITGB1	CD16 Mono	after	1.35101867347949e-05	0.208810619017555	0.762	0.691	0.45310464271155	0.000108081493878359	responders, post-VDZ vs pre-VDZ (pre-VDZ as reference)
PBMCs	scRNAseq	ITGAM	CD16 Mono	before	0.00125504749127659	-0.0734366142696956	0.083	0.134	1	0.00669358662014181	responders, post-VDZ vs pre-VDZ (pre-VDZ as reference)
PBMCs	scRNAseq	ITGAL	CD16 Mono	after	0.0147836255106205	0.103375011839069	0.531	0.466	1	0.0407874654227523	responders, post-VDZ vs pre-VDZ (pre-VDZ as reference)
PBMCs	scRNAseq	ITGAX	CD16 Mono	after	1.9274603923805e-07	0.273943823177027	0.723	0.628	0.00646431666396572	3.0839366278088e-06	responders, post-VDZ vs pre-VDZ (pre-VDZ as reference)
PBMCs	scRNAseq	PECAM1	CD16 Mono	after	0.011337046534719	0.130912144464472	0.839	0.816	1	0.0407874654227523	responders, post-VDZ vs pre-VDZ (pre-VDZ as reference)
PBMCs	scRNAseq	ICAM1	CD16 Mono	before	0.0152952995335321	-0.12929357396108	0.306	0.335	1	0.0407874654227523	responders, post-VDZ vs pre-VDZ (pre-VDZ as reference)
PBMCs	scRNAseq	ITGB2	CD4 TCM	after	0.00643843818399198	0.0386934367001087	0.267	0.24	1	0.0364980553425764	responders, post-VDZ vs pre-VDZ (pre-VDZ as reference)
PBMCs	scRNAseq	ITGA4	CD4 TCM	after	2.20898854525362e-07	0.103391377956493	0.296	0.252	0.00740850578307157	3.53438167240578e-06	responders, post-VDZ vs pre-VDZ (pre-VDZ as reference)
PBMCs	scRNAseq	ITGAL	CD4 TCM	after	0.00684338537673307	0.0310335768764283	0.145	0.128	1	0.0364980553425764	responders, post-VDZ vs pre-VDZ (pre-VDZ as reference)
PBMCs	scRNAseq	ITGB1	CD8 TEM	after	0.00698190813782249	0.0499282570249818	0.505	0.462	1	0.022342106041032	responders, post-VDZ vs pre-VDZ (pre-VDZ as reference)
PBMCs	scRNAseq	ITGB2	CD8 TEM	after	0.00138474010927053	0.07930734014958	0.482	0.436	1	0.00553896043708211	responders, post-VDZ vs pre-VDZ (pre-VDZ as reference)
PBMCs	scRNAseq	ITGA4	CD8 TEM	after	3.5327613934832e-06	0.0887158329789257	0.467	0.399	0.11848175161464	2.82620911478656e-05	responders, post-VDZ vs pre-VDZ (pre-VDZ as reference)
PBMCs	scRNAseq	ITGAL	CD8 TEM	after	1.16767728691679e-07	0.107569754979668	0.414	0.339	0.00391615608486154	1.86828365906687e-06	responders, post-VDZ vs pre-VDZ (pre-VDZ as reference)
PBMCs	scRNAseq	CDH1	CD8 TEM	before	8.9938768300783e-05	-0.00695533909070835	0	0.004	1	0.000479673430937509	responders, post-VDZ vs pre-VDZ (pre-VDZ as reference)
PBMCs	scRNAseq	ITGB7	cDC2	after	0.00248203764970389	0.0224170514210726	0.422	0.333	1	0.0397126023952623	responders, post-VDZ vs pre-VDZ (pre-VDZ as reference)
PBMCs	scRNAseq	ITGB2	Eryth	after	0.00278830883049283	0.0314476942062633	0.168	0.106	1	0.0446129412878852	responders, post-VDZ vs pre-VDZ (pre-VDZ as reference)
PBMCs	scRNAseq	ITGB2	NK	before	1.80312631638199e-06	-0.204485943732999	0.603	0.664	0.0604732503988193	1.4425010531056e-05	responders, post-VDZ vs pre-VDZ (pre-VDZ as reference)
PBMCs	scRNAseq	ICAM1	NK	before	1.52906155621565e-22	-0.315344049716413	0.09	0.246	5.12816664723606e-18	2.44649848994504e-21	responders, post-VDZ vs pre-VDZ (pre-VDZ as reference)
PBMCs	scRNAseq	ITGB1	Plasmablast	after	1.58232615695021e-05	0.982501678577802	0.806	0.54	0.530680546517961	0.000253172185112033	responders, post-VDZ vs pre-VDZ (pre-VDZ as reference)
PBMCs	scRNAseq	ITGB1	CD14_Mono	after	1.2108017368087e-08	0.148740475761926	0.744	0.684	0.000406078686490901	6.45760926297973e-08	non-responders, post-VDZ vs pre-VDZ (pre-VDZ as reference)
PBMCs	scRNAseq	ITGB2	CD14_Mono	after	3.93051671426451e-16	0.199169685523122	0.826	0.748	1.31821669563003e-11	3.14441337141161e-15	non-responders, post-VDZ vs pre-VDZ (pre-VDZ as reference)
PBMCs	scRNAseq	ITGAM	CD14_Mono	after	0.00067647051526471	0.0547696194360863	0.447	0.4	1	0.00270588206105884	non-responders, post-VDZ vs pre-VDZ (pre-VDZ as reference)
PBMCs	scRNAseq	ITGAX	CD14_Mono	after	0.00124915757517016	0.0749517045464687	0.816	0.78	1	0.00399730424054453	non-responders, post-VDZ vs pre-VDZ (pre-VDZ as reference)
PBMCs	scRNAseq	PECAM1	CD14_Mono	after	0.00366519481779465	0.0540046039874118	0.556	0.514	1	0.00977385284745239	non-responders, post-VDZ vs pre-VDZ (pre-VDZ as reference)
PBMCs	scRNAseq	ICAM1	CD14_Mono	after	2.70086624746305e-24	0.299887836009238	0.492	0.398	9.05816522074158e-20	4.32138599594088e-23	non-responders, post-VDZ vs pre-VDZ (pre-VDZ as reference)
PBMCs	scRNAseq	ITGB2	CD16_Mono	after	4.36288458251594e-11	0.340306692667544	0.907	0.813	1.4632242312842e-06	6.9806153320255e-10	non-responders, post-VDZ vs pre-VDZ (pre-VDZ as reference)
PBMCs	scRNAseq	ITGAL	CD16_Mono	after	0.00599950014850364	0.143997104452782	0.576	0.492	1	0.0479960011880292	non-responders, post-VDZ vs pre-VDZ (pre-VDZ as reference)
PBMCs	scRNAseq	ITGB1	CD4_Naive	after	4.32001366103836e-06	0.062118998724163	0.141	0.098	0.144884618163905	5.87138257612032e-05	non-responders, post-VDZ vs pre-VDZ (pre-VDZ as reference)
PBMCs	scRNAseq	ITGB2	CD4_Naive	after	7.3392282201504e-06	0.0696057303540369	0.2	0.152	0.246143036047404	5.87138257612032e-05	non-responders, post-VDZ vs pre-VDZ (pre-VDZ as reference)
PBMCs	scRNAseq	ITGA4	CD4_Naive	after	0.00105591202406398	0.0606167122183961	0.18	0.144	1	0.00337891847700472	non-responders, post-VDZ vs pre-VDZ (pre-VDZ as reference)
PBMCs	scRNAseq	ITGB7	CD4_Naive	after	4.30236933955436e-05	0.03891232318341	0.065	0.039	1	0.000229459698109566	non-responders, post-VDZ vs pre-VDZ (pre-VDZ as reference)
PBMCs	scRNAseq	ITGAL	CD4_Naive	after	0.0107775682514397	0.031897639818151	0.093	0.074	1	0.0287401820038392	non-responders, post-VDZ vs pre-VDZ (pre-VDZ as reference)
PBMCs	scRNAseq	ITGAX	CD4_Naive	after	0.000134723588675413	0.0159010964943241	0.019	0.007	1	0.000538894354701653	non-responders, post-VDZ vs pre-VDZ (pre-VDZ as reference)
PBMCs	scRNAseq	ITGA4	CD4_TCM	after	1.28928877605295e-09	0.147450799571808	0.289	0.234	4.32401669712639e-05	2.06286204168472e-08	non-responders, post-VDZ vs pre-VDZ (pre-VDZ as reference)
PBMCs	scRNAseq	CDH1	CD4_TEM	after	0.00271698547356907	0.0302674396687964	0.021	0	1	0.0434717675771051	non-responders, post-VDZ vs pre-VDZ (pre-VDZ as reference)
PBMCs	scRNAseq	ITGB1	CD8_TEM	after	9.57110150102459e-14	0.218694881616216	0.461	0.351	3.20995602141363e-09	1.53137624016394e-12	non-responders, post-VDZ vs pre-VDZ (pre-VDZ as reference)
PBMCs	scRNAseq	ITGB2	CD8_TEM	after	9.82726789234958e-06	0.110823851816083	0.401	0.332	0.32958691057362	5.24120954258644e-05	non-responders, post-VDZ vs pre-VDZ (pre-VDZ as reference)
PBMCs	scRNAseq	ITGA4	CD8_TEM	after	4.51381486630783e-05	0.105112693046602	0.367	0.304	1	0.000180552594652313	non-responders, post-VDZ vs pre-VDZ (pre-VDZ as reference)
PBMCs	scRNAseq	ITGB7	CD8_TEM	after	4.61203104694574e-07	0.0681331835015189	0.119	0.07	0.0154678297252466	3.68962483755659e-06	non-responders, post-VDZ vs pre-VDZ (pre-VDZ as reference)
PBMCs	scRNAseq	ITGAL	CD8_TEM	after	0.00617846097298557	0.0626068988985662	0.289	0.246	1	0.0197710751135538	non-responders, post-VDZ vs pre-VDZ (pre-VDZ as reference)
PBMCs	scRNAseq	ITGAX	CD8_TEM	after	0.0106321774895055	0.0230785347119286	0.03	0.016	1	0.0283524733053481	non-responders, post-VDZ vs pre-VDZ (pre-VDZ as reference)
PBMCs	scRNAseq	ITGB2	cDC2	after	0.000137816827675738	0.447893867525293	0.888	0.783	1	0.00220506924281181	non-responders, post-VDZ vs pre-VDZ (pre-VDZ as reference)
PBMCs	scRNAseq	ITGA4	HSPC	before	2.45296641033624e-06	-0.707652895662356	0.059	0.361	0.0822675874698569	3.92474625653799e-05	non-responders, post-VDZ vs pre-VDZ (pre-VDZ as reference)
PBMCs	scRNAseq	ITGAE	HSPC	before	0.000544638276787693	-0.237229338327931	0.033	0.222	1	0.00435710621430154	non-responders, post-VDZ vs pre-VDZ (pre-VDZ as reference)
PBMCs	scRNAseq	ICAM1	HSPC	before	0.00382314829756548	-0.280967886916468	0.044	0.167	1	0.0203901242536826	non-responders, post-VDZ vs pre-VDZ (pre-VDZ as reference)
PBMCs	scRNAseq	ITGB7	pDC	after	0.000407810105097729	0.299560281858908	0.179	0	1	0.00652496168156366	non-responders, post-VDZ vs pre-VDZ (pre-VDZ as reference)
PBMCs	scRNAseq	ITGB1	Plasmablast	after	0.000120818384588619	0.48197270737728	0.405	0.604	1	0.0019330941534179	non-responders, post-VDZ vs pre-VDZ (pre-VDZ as reference)
PBMCs	scRNAseq	ITGA4	Plasmablast	before	0.00259314175132067	-0.646233184001631	0.429	0.733	1	0.0207451340105654	non-responders, post-VDZ vs pre-VDZ (pre-VDZ as reference)
PBMCs	scRNAseq	ITGA4	Treg	after	0.000403581595439907	0.229254255738482	0.209	0.144	1	0.00322865276351926	non-responders, post-VDZ vs pre-VDZ (pre-VDZ as reference)
PBMCs	scRNAseq	ITGAX	Treg	after	2.19590742862938e-05	0.0191614664683409	0.02	0.002	0.736463433413723	0.000351345188580701	non-responders, post-VDZ vs pre-VDZ (pre-VDZ as reference)
mucosa	scRNAseq	ITGB1	CD4+ Activated Fos-hi	responders	1.43234936622574e-06	-0.129861089066736	0.11	0.153	0.0480381330444787	4.58351797192236e-06	pre-VDZ, non-responders vs responders (responders as reference)
mucosa	scRNAseq	ITGB2	CD4+ Activated Fos-hi	responders	8.6235916029489e-07	-0.00641769671033321	0.127	0.158	0.02892180151797	4.58351797192236e-06	pre-VDZ, non-responders vs responders (responders as reference)
mucosa	scRNAseq	ITGA1	CD4+ Activated Fos-hi	responders	1.56655858039423e-19	-0.396648844656599	0.069	0.152	5.25392416692616e-15	2.50649372863076e-18	pre-VDZ, non-responders vs responders (responders as reference)
mucosa	scRNAseq	ITGA4	CD4+ Activated Fos-hi	non-responders	2.24462130493442e-08	0.0533446553470205	0.237	0.269	0.000752801093248904	1.79569704394753e-07	pre-VDZ, non-responders vs responders (responders as reference)
mucosa	scRNAseq	ITGB7	CD4+ Activated Fos-hi	responders	0.0018595754946842	-0.068608127993091	0.034	0.052	1	0.00495886798582454	pre-VDZ, non-responders vs responders (responders as reference)
mucosa	scRNAseq	ITGAE	CD4+ Activated Fos-hi	non-responders	0.00326978654924411	0.0108776900391202	0.086	0.1	1	0.00747379782684369	pre-VDZ, non-responders vs responders (responders as reference)
mucosa	scRNAseq	ITGAL	CD4+ Activated Fos-hi	responders	1.3286599294273e-06	-0.0817925956932319	0.116	0.156	0.0445605967131329	4.58351797192236e-06	pre-VDZ, non-responders vs responders (responders as reference)
mucosa	scRNAseq	CDH1	CD4+ Activated Fos-hi	responders	0.00866028531749338	-0.0425795437424695	0.017	0.027	1	0.0173205706349868	pre-VDZ, non-responders vs responders (responders as reference)
mucosa	scRNAseq	FN1	CD4+ Activated Fos-hi	responders	0.0189399355276491	-0.0241749289887011	0.005	0.012	1	0.0303038968442385	pre-VDZ, non-responders vs responders (responders as reference)
mucosa	scRNAseq	ICAM1	CD4+ Activated Fos-hi	non-responders	0.0151754667246795	0.0453410322009111	0.041	0.047	1	0.0269786075105413	pre-VDZ, non-responders vs responders (responders as reference)
mucosa	scRNAseq	ITGB2	CD4+ Activated Fos-lo	responders	0.00187443783841095	-0.299708889858823	0.108	0.204	1	0.0299910054145751	pre-VDZ, non-responders vs responders (responders as reference)
mucosa	scRNAseq	ITGA1	CD8+ IL17+	responders	0.00227449281541502	-0.218785872040634	0.125	0.187	1	0.0121306283488801	pre-VDZ, non-responders vs responders (responders as reference)
mucosa	scRNAseq	ITGA4	CD8+ IL17+	non-responders	0.000283545347791792	0.124168236223889	0.492	0.53	1	0.00226836278233434	pre-VDZ, non-responders vs responders (responders as reference)
mucosa	scRNAseq	ITGAL	CD8+ IL17+	responders	1.82588077750533e-05	-0.13836142464667	0.227	0.32	0.612363895159739	0.000292140924400853	pre-VDZ, non-responders vs responders (responders as reference)
mucosa	scRNAseq	ITGA1	CD8+ LP	responders	0.000121172264950607	-0.225632174992317	0.136	0.201	1	0.000969378119604853	pre-VDZ, non-responders vs responders (responders as reference)
mucosa	scRNAseq	ITGA4	CD8+ LP	non-responders	0.00751075896385518	0.0817163373003151	0.303	0.331	1	0.0364613190444721	pre-VDZ, non-responders vs responders (responders as reference)
mucosa	scRNAseq	ITGAL	CD8+ LP	responders	7.60908362112604e-06	-0.168825165570671	0.194	0.279	0.255193446485325	0.000121745337938017	pre-VDZ, non-responders vs responders (responders as reference)
mucosa	scRNAseq	ICAM1	CD8+ LP	non-responders	0.00911532976111802	0.193615019002091	0.063	0.054	1	0.0364613190444721	pre-VDZ, non-responders vs responders (responders as reference)
mucosa	scRNAseq	ITGB1	Cycling B	non-responders	0.000275083858885314	0.460090349249008	0.478	0.513	1	0.00440134174216503	pre-VDZ, non-responders vs responders (responders as reference)
mucosa	scRNAseq	ITGB2	Cycling B	responders	0.00334688153553073	-0.0805271921855551	0.194	0.368	1	0.0133875261421229	pre-VDZ, non-responders vs responders (responders as reference)
mucosa	scRNAseq	ITGA4	Cycling B	non-responders	0.00780933832521879	0.281453251924042	0.403	0.441	1	0.0208249022005834	pre-VDZ, non-responders vs responders (responders as reference)
mucosa	scRNAseq	ITGB7	Cycling B	responders	0.000686485094152969	-0.233636780443281	0.045	0.237	1	0.00549188075322375	pre-VDZ, non-responders vs responders (responders as reference)
mucosa	scRNAseq	ITGAE	Cycling B	non-responders	0.00695340981126631	0.257200738644933	0.731	0.789	1	0.0208249022005834	pre-VDZ, non-responders vs responders (responders as reference)
mucosa	scRNAseq	ICAM1	Cycling B	non-responders	0.00137612985087256	0.278706201679333	0.194	0.237	1	0.00733935920465367	pre-VDZ, non-responders vs responders (responders as reference)
mucosa	scRNAseq	ITGB1	DC2	responders	3.61659131751913e-05	-0.0211335008718585	0.367	0.51	1	0.000144663652700765	pre-VDZ, non-responders vs responders (responders as reference)
mucosa	scRNAseq	ITGB2	DC2	responders	9.52982964552024e-05	-0.351590153233728	0.58	0.728	1	0.000254128790547206	pre-VDZ, non-responders vs responders (responders as reference)
mucosa	scRNAseq	ITGAM	DC2	responders	8.06137879965856e-05	-0.119816328130721	0.077	0.192	1	0.000254128790547206	pre-VDZ, non-responders vs responders (responders as reference)
mucosa	scRNAseq	ITGA4	DC2	non-responders	3.5696389243391e-05	0.110077603723902	0.533	0.642	1	0.000144663652700765	pre-VDZ, non-responders vs responders (responders as reference)
mucosa	scRNAseq	ITGAE	DC2	responders	0.000547523689196682	-0.198985121865094	0.197	0.331	1	0.00125148271816384	pre-VDZ, non-responders vs responders (responders as reference)
mucosa	scRNAseq	ITGAL	DC2	responders	0.00590010539104738	-0.0478356875513189	0.057	0.123	1	0.0104890762507509	pre-VDZ, non-responders vs responders (responders as reference)
mucosa	scRNAseq	ITGAX	DC2	responders	6.84887605010269e-07	-0.292560235227522	0.483	0.695	0.0229697604968344	5.47910084008215e-06	pre-VDZ, non-responders vs responders (responders as reference)
mucosa	scRNAseq	PECAM1	DC2	responders	6.08491334774263e-07	-0.171467877472966	0.097	0.255	0.0204075823856592	5.47910084008215e-06	pre-VDZ, non-responders vs responders (responders as reference)
mucosa	scRNAseq	ICAM1	DC2	responders	0.0009294867781136	-0.0118356809386995	0.543	0.659	1	0.0018589735562272	pre-VDZ, non-responders vs responders (responders as reference)
mucosa	scRNAseq	ITGB1	Follicular	non-responders	5.97134245644915e-09	0.0736048486202229	0.103	0.128	0.000200266883304392	1.91082958606373e-08	pre-VDZ, non-responders vs responders (responders as reference)
mucosa	scRNAseq	ITGB2	Follicular	responders	1.20572974692476e-10	-0.0685170489399884	0.102	0.153	4.04377642523627e-06	4.82291898769905e-10	pre-VDZ, non-responders vs responders (responders as reference)
mucosa	scRNAseq	ITGAM	Follicular	non-responders	0.00417006814751762	0.000502198274567031	0.017	0.027	1	0.00606555366911654	pre-VDZ, non-responders vs responders (responders as reference)
mucosa	scRNAseq	ITGA4	Follicular	non-responders	1.47068413216008e-24	0.201322312109956	0.278	0.317	4.93238044243848e-20	2.35309461145613e-23	pre-VDZ, non-responders vs responders (responders as reference)
mucosa	scRNAseq	ITGB7	Follicular	non-responders	0.000151469765861452	0.00524312396790569	0.034	0.049	1	0.000302939531722905	pre-VDZ, non-responders vs responders (responders as reference)
mucosa	scRNAseq	ITGAE	Follicular	non-responders	1.63986218193009e-17	0.116867769767647	0.121	0.158	5.49976978575714e-13	1.31188974554407e-16	pre-VDZ, non-responders vs responders (responders as reference)
mucosa	scRNAseq	ITGAL	Follicular	responders	6.67263569832765e-12	-0.0557592028714168	0.056	0.1	2.23786856050513e-07	3.55873903910808e-11	pre-VDZ, non-responders vs responders (responders as reference)
mucosa	scRNAseq	ITGAX	Follicular	responders	0.00184197555195313	-0.0749819438392303	0.025	0.042	1	0.00294716088312501	pre-VDZ, non-responders vs responders (responders as reference)
mucosa	scRNAseq	PECAM1	Follicular	non-responders	0.000400888646614676	0.0641970999932894	0.034	0.039	1	0.00071269092731498	pre-VDZ, non-responders vs responders (responders as reference)
mucosa	scRNAseq	CDH1	Follicular	responders	8.69512428901088e-06	-0.0732794013702472	0.012	0.034	0.291617078404847	1.98745698034534e-05	pre-VDZ, non-responders vs responders (responders as reference)
mucosa	scRNAseq	VCAM1	Follicular	responders	0.0238708133165821	-0.00963018428893326	0	0.002	1	0.0318277510887761	pre-VDZ, non-responders vs responders (responders as reference)
mucosa	scRNAseq	ICAM1	Follicular	non-responders	2.0578150099637e-08	0.0300601590129349	0.09	0.117	0.000690149998041625	5.48750669323653e-08	pre-VDZ, non-responders vs responders (responders as reference)
mucosa	scRNAseq	ITGB1	GC	responders	9.15714795995642e-09	-0.193520338129462	0.151	0.29	0.000307112428281018	2.93028734718605e-08	pre-VDZ, non-responders vs responders (responders as reference)
mucosa	scRNAseq	ITGB2	GC	non-responders	3.1602984245753e-14	0.0719882892445286	0.183	0.323	1.05990088563406e-09	5.05647747932047e-13	pre-VDZ, non-responders vs responders (responders as reference)
mucosa	scRNAseq	ITGA4	GC	non-responders	1.30982014698024e-12	0.14389229166596	0.294	0.413	4.39287480894234e-08	1.0478561175842e-11	pre-VDZ, non-responders vs responders (responders as reference)
mucosa	scRNAseq	ITGB7	GC	responders	9.93390347609277e-05	-0.0565766717778269	0.032	0.086	1	0.000176602728463871	pre-VDZ, non-responders vs responders (responders as reference)
mucosa	scRNAseq	ITGAE	GC	non-responders	2.62977604854585e-12	0.251844506255687	0.268	0.35	8.81974291161307e-08	1.40254722589112e-11	pre-VDZ, non-responders vs responders (responders as reference)
mucosa	scRNAseq	ITGAL	GC	responders	1.13076689083598e-11	-0.215712568107314	0.095	0.246	3.79236599848571e-07	4.52306756334392e-11	pre-VDZ, non-responders vs responders (responders as reference)
mucosa	scRNAseq	ITGAX	GC	responders	2.61223208672623e-05	-0.0771891304503095	0.013	0.062	0.876090397246242	5.22446417345246e-05	pre-VDZ, non-responders vs responders (responders as reference)
mucosa	scRNAseq	PECAM1	GC	responders	0.00526761313875176	-0.0403579235389654	0.048	0.087	1	0.00842818102200281	pre-VDZ, non-responders vs responders (responders as reference)
mucosa	scRNAseq	CDH1	GC	non-responders	2.65232387204424e-07	0.115839013954968	0.024	0.059	0.00889536380206199	6.06245456467256e-07	pre-VDZ, non-responders vs responders (responders as reference)
mucosa	scRNAseq	ICAM1	GC	responders	1.73366024917984e-07	-0.0220885868668864	0.101	0.191	0.00581434974369933	4.62309399781289e-07	pre-VDZ, non-responders vs responders (responders as reference)
mucosa	scRNAseq	ITGA3	Ig negative	responders	0.0137614244572296	-0.203991878266514	0.009	0.048	1	0.0440365582631347	pre-VDZ, non-responders vs responders (responders as reference)
mucosa	scRNAseq	ITGB7	Ig negative	responders	0.00138503554180334	-0.170440830813207	0.051	0.14	1	0.0110802843344267	pre-VDZ, non-responders vs responders (responders as reference)
mucosa	scRNAseq	ITGAL	Ig negative	responders	0.00929044762157788	-0.104536168771908	0.055	0.121	1	0.0386002102491418	pre-VDZ, non-responders vs responders (responders as reference)
mucosa	scRNAseq	PECAM1	Ig negative	responders	0.00965005256228545	-0.132188146478951	0.189	0.287	1	0.0386002102491418	pre-VDZ, non-responders vs responders (responders as reference)
mucosa	scRNAseq	CDH1	Ig negative	responders	9.5499160225956e-06	-0.0651256721173364	0.023	0.09	0.320285083565811	0.00015279865636153	pre-VDZ, non-responders vs responders (responders as reference)
mucosa	scRNAseq	ITGB1	IgA	responders	4.98209195857073e-08	-0.00308868396117409	0.105	0.137	0.00167089400106545	1.32855785561886e-07	pre-VDZ, non-responders vs responders (responders as reference)
mucosa	scRNAseq	ITGB2	IgA	non-responders	3.07756252960025e-07	0.0127857867646398	0.066	0.086	0.0103215292117733	7.03442863908629e-07	pre-VDZ, non-responders vs responders (responders as reference)
mucosa	scRNAseq	ITGA3	IgA	responders	0.000474085686727545	-0.0168689529671432	0.023	0.037	1	0.000758537098764072	pre-VDZ, non-responders vs responders (responders as reference)
mucosa	scRNAseq	ITGA4	IgA	non-responders	1.13679652821896e-13	0.119071035322789	0.283	0.304	3.81258819634073e-09	6.06291481716776e-13	pre-VDZ, non-responders vs responders (responders as reference)
mucosa	scRNAseq	ITGB7	IgA	responders	1.12026677404865e-09	-0.0252439467622382	0.135	0.176	3.75715070680435e-05	4.48106709619459e-09	pre-VDZ, non-responders vs responders (responders as reference)
mucosa	scRNAseq	ITGAE	IgA	non-responders	5.12542890138901e-06	0.021239717771087	0.15	0.172	0.171896634494785	1.0250857802778e-05	pre-VDZ, non-responders vs responders (responders as reference)
mucosa	scRNAseq	ITGAL	IgA	responders	6.77584843153861e-20	-0.0247698840883202	0.071	0.123	2.27248404696942e-15	1.08413574904618e-18	pre-VDZ, non-responders vs responders (responders as reference)
mucosa	scRNAseq	PECAM1	IgA	responders	1.35882374830105e-08	-0.00737672048089433	0.231	0.276	0.000455722308705207	4.34823599456337e-08	pre-VDZ, non-responders vs responders (responders as reference)
mucosa	scRNAseq	CDH1	IgA	non-responders	0.000200714060501312	0.0228894681923045	0.035	0.043	1	0.000356824996446776	pre-VDZ, non-responders vs responders (responders as reference)
mucosa	scRNAseq	FN1	IgA	non-responders	0.0312020696688329	0.000440074609774917	0.007	0.011	1	0.0453848286092114	pre-VDZ, non-responders vs responders (responders as reference)
mucosa	scRNAseq	ICAM1	IgA	non-responders	8.43242183293829e-15	0.183378211477422	0.173	0.187	2.82806563433084e-10	6.74593746635063e-14	pre-VDZ, non-responders vs responders (responders as reference)
mucosa	scRNAseq	ITGB1	IgG	responders	5.11079252587926e-28	-0.0117525718677119	0.153	0.243	1.71405759732939e-23	2.72575601380227e-27	pre-VDZ, non-responders vs responders (responders as reference)
mucosa	scRNAseq	ITGB2	IgG	non-responders	8.65053240424172e-12	0.0374975633972412	0.114	0.145	2.90121555773459e-07	1.53787242742075e-11	pre-VDZ, non-responders vs responders (responders as reference)
mucosa	scRNAseq	ITGA1	IgG	responders	8.69176043200036e-05	-0.0108386140073576	0.014	0.028	1	0.000126425606283642	pre-VDZ, non-responders vs responders (responders as reference)
mucosa	scRNAseq	ITGA3	IgG	responders	1.70112597511953e-09	-0.0244935535863964	0.022	0.05	5.7052362953559e-05	2.72180156019126e-09	pre-VDZ, non-responders vs responders (responders as reference)
mucosa	scRNAseq	ITGA4	IgG	non-responders	5.14502235901138e-45	0.00354044712930812	0.248	0.378	1.72553759876524e-40	8.23203577441822e-44	pre-VDZ, non-responders vs responders (responders as reference)
mucosa	scRNAseq	ITGB7	IgG	responders	4.38353350015424e-23	-0.0358043113394639	0.117	0.197	1.47014946528173e-18	1.40273072004936e-22	pre-VDZ, non-responders vs responders (responders as reference)
mucosa	scRNAseq	ITGAE	IgG	non-responders	6.89515697713157e-26	0.104794624768701	0.185	0.231	2.31249774699039e-21	2.75806279085263e-25	pre-VDZ, non-responders vs responders (responders as reference)
mucosa	scRNAseq	ITGAL	IgG	non-responders	7.90720247221577e-23	0.0173928442588319	0.087	0.145	2.65191756513173e-18	2.10858732592421e-22	pre-VDZ, non-responders vs responders (responders as reference)
mucosa	scRNAseq	ITGAX	IgG	non-responders	0.00754198160676806	0.0223656322912311	0.005	0.004	1	0.0100489556424272	pre-VDZ, non-responders vs responders (responders as reference)
mucosa	scRNAseq	PECAM1	IgG	non-responders	3.27856312053902e-37	0.093393905684745	0.391	0.494	1.09956449936638e-32	2.62285049643122e-36	pre-VDZ, non-responders vs responders (responders as reference)
mucosa	scRNAseq	CDH1	IgG	non-responders	1.34286686559696e-16	0.0224781584544186	0.042	0.08	4.50370689383907e-12	2.68573373119391e-16	pre-VDZ, non-responders vs responders (responders as reference)
mucosa	scRNAseq	FN1	IgG	non-responders	0.00816477645947206	0.00747804099029937	0.01	0.016	1	0.0100489556424272	pre-VDZ, non-responders vs responders (responders as reference)
mucosa	scRNAseq	ICAM1	IgG	non-responders	5.83166717889468e-17	0.106479961034157	0.178	0.23	1.9558245384577e-12	1.33295249803307e-16	pre-VDZ, non-responders vs responders (responders as reference)
mucosa	scRNAseq	MADCAM1	IgG	responders	0.0297149949309667	-0.00849960067845243	0.004	0.01	1	0.0339599942068191	pre-VDZ, non-responders vs responders (responders as reference)
mucosa	scRNAseq	ITGB1	IgM	non-responders	7.9766443019208e-05	0.00851020305154998	0.066	0.155	1	0.000638131544153664	pre-VDZ, non-responders vs responders (responders as reference)
mucosa	scRNAseq	ITGB2	IgM	non-responders	0.00273771664204497	0.131066337337929	0.066	0.075	1	0.00876069325454391	pre-VDZ, non-responders vs responders (responders as reference)
mucosa	scRNAseq	ITGA4	IgM	non-responders	1.47968342419173e-07	0.387225015914165	0.296	0.344	0.00496256226805422	2.36749347870677e-06	pre-VDZ, non-responders vs responders (responders as reference)
mucosa	scRNAseq	ITGAE	IgM	non-responders	0.00070981846448359	0.0656635019698008	0.138	0.191	1	0.00283927385793436	pre-VDZ, non-responders vs responders (responders as reference)
mucosa	scRNAseq	ITGAL	IgM	responders	0.00945870748463335	-0.0867933361091794	0.041	0.105	1	0.0252232199590223	pre-VDZ, non-responders vs responders (responders as reference)
mucosa	scRNAseq	PECAM1	IgM	responders	0.000175697165321718	-0.0538991188237106	0.148	0.256	1	0.000937051548382494	pre-VDZ, non-responders vs responders (responders as reference)
mucosa	scRNAseq	ITGB1	Inflammatory monocytes	non-responders	1.08203352393928e-08	0.135492680330255	0.309	0.409	0.000362892403258755	4.32813409575711e-08	pre-VDZ, non-responders vs responders (responders as reference)
mucosa	scRNAseq	ITGB2	Inflammatory monocytes	non-responders	1.4699679359195e-16	0.359984055555292	0.512	0.643	4.92997846348682e-12	1.1759743487356e-15	pre-VDZ, non-responders vs responders (responders as reference)
mucosa	scRNAseq	ITGAM	Inflammatory monocytes	non-responders	0.000182193312099223	0.129331326930744	0.193	0.25	1	0.000416441856226795	pre-VDZ, non-responders vs responders (responders as reference)
mucosa	scRNAseq	ITGA4	Inflammatory monocytes	non-responders	0.00820618831942612	0.101762156499764	0.226	0.279	1	0.0145887792345353	pre-VDZ, non-responders vs responders (responders as reference)
mucosa	scRNAseq	ITGB7	Inflammatory monocytes	non-responders	0.0161713369142561	0.0498808809570964	0.015	0.031	1	0.0258741390628098	pre-VDZ, non-responders vs responders (responders as reference)
mucosa	scRNAseq	ITGAE	Inflammatory monocytes	non-responders	0.00599908436634817	0.0667722542031685	0.114	0.153	1	0.0119981687326963	pre-VDZ, non-responders vs responders (responders as reference)
mucosa	scRNAseq	ITGAL	Inflammatory monocytes	responders	6.90279659918602e-06	-0.0812686391936032	0.066	0.139	0.231505992343501	1.84074575978294e-05	pre-VDZ, non-responders vs responders (responders as reference)
mucosa	scRNAseq	ITGAX	Inflammatory monocytes	non-responders	2.01184550052352e-11	0.271842769500848	0.479	0.592	6.74732743965579e-07	1.07298426694588e-10	pre-VDZ, non-responders vs responders (responders as reference)
mucosa	scRNAseq	PECAM1	Inflammatory monocytes	non-responders	7.18267636217172e-07	0.210139394139043	0.248	0.321	0.0240892599834515	2.29845643589495e-06	pre-VDZ, non-responders vs responders (responders as reference)
mucosa	scRNAseq	ICAM1	Inflammatory monocytes	responders	9.08983668718983e-20	-0.32775449275811	0.485	0.731	3.04854942814973e-15	1.45437386995037e-18	pre-VDZ, non-responders vs responders (responders as reference)
mucosa	scRNAseq	ICAM1	NKs	non-responders	0.000182924147570754	0.726982646765622	0.279	0.104	1	0.00292678636113207	pre-VDZ, non-responders vs responders (responders as reference)
mucosa	scRNAseq	ITGB1	Tregs	non-responders	1.45793480137641e-10	0.0148915689521255	0.152	0.222	4.8896217368562e-06	5.83173920550564e-10	pre-VDZ, non-responders vs responders (responders as reference)
mucosa	scRNAseq	ITGB2	Tregs	non-responders	2.48146973674892e-16	0.025853792845193	0.197	0.297	8.32235320310853e-12	3.97035157879827e-15	pre-VDZ, non-responders vs responders (responders as reference)
mucosa	scRNAseq	ITGA4	Tregs	non-responders	2.80452902561584e-13	0.00767611201656515	0.27	0.373	9.40582944611041e-09	1.49574881366178e-12	pre-VDZ, non-responders vs responders (responders as reference)
mucosa	scRNAseq	ITGB7	Tregs	responders	0.000287489846363951	-0.126724840475579	0.015	0.044	1	0.000766639590303868	pre-VDZ, non-responders vs responders (responders as reference)
mucosa	scRNAseq	ITGAE	Tregs	non-responders	3.83552790964729e-08	0.202120573185713	0.137	0.169	0.00128635935033751	1.22736893108713e-07	pre-VDZ, non-responders vs responders (responders as reference)
mucosa	scRNAseq	ITGAL	Tregs	responders	1.51191526708646e-14	-0.107803724983383	0.181	0.294	5.07066142275456e-10	1.20953221366917e-13	pre-VDZ, non-responders vs responders (responders as reference)
mucosa	scRNAseq	CDH1	Tregs	responders	0.00157463247539179	-0.080370866695293	0.014	0.037	1	0.00314926495078358	pre-VDZ, non-responders vs responders (responders as reference)
mucosa	scRNAseq	ICAM1	Tregs	responders	0.000974965516395396	-0.138903751981584	0.029	0.06	1	0.00222849260890376	pre-VDZ, non-responders vs responders (responders as reference)
mucosa	scRNAseq	ITGB1	CD4+ Activated Fos-hi	non-responders	0.00239883038481693	0.0364922228973368	0.155	0.172	1	0.012793762052357	post-VDZ, non-responders vs responders (responders as reference)
mucosa	scRNAseq	ITGB2	CD4+ Activated Fos-hi	non-responders	0.00859222749120749	0.00835166976684787	0.135	0.152	1	0.03436890996483	post-VDZ, non-responders vs responders (responders as reference)
mucosa	scRNAseq	ITGA1	CD4+ Activated Fos-hi	responders	0.000213327320538165	-0.191009978694925	0.115	0.163	1	0.00170661856430532	post-VDZ, non-responders vs responders (responders as reference)
mucosa	scRNAseq	ITGAL	CD4+ Activated Fos-hi	responders	0.000126981458169121	-0.0683302848891415	0.142	0.185	1	0.00170661856430532	post-VDZ, non-responders vs responders (responders as reference)
mucosa	scRNAseq	ITGA4	CD69+ Mast	responders	0.0021164254763703	-0.747172238131018	0.054	0.329	1	0.0338628076219247	post-VDZ, non-responders vs responders (responders as reference)
mucosa	scRNAseq	ITGB2	CD8+ IELs	responders	0.000278212403915997	-0.51968336778061	0.062	0.2	1	0.00445139846265596	post-VDZ, non-responders vs responders (responders as reference)
mucosa	scRNAseq	VCAM1	CD8+ IELs	responders	0.00542587053243225	-0.234908149372841	0	0.032	1	0.043406964259458	post-VDZ, non-responders vs responders (responders as reference)
mucosa	scRNAseq	ITGAL	CD8+ IL17+	responders	0.00120126590949155	-0.218046502336074	0.279	0.296	1	0.0192202545518648	post-VDZ, non-responders vs responders (responders as reference)
mucosa	scRNAseq	ITGB1	DC2	responders	0.00374601105273023	-0.36099682571261	0.396	0.557	1	0.0085623109776691	post-VDZ, non-responders vs responders (responders as reference)
mucosa	scRNAseq	ITGB2	DC2	responders	8.29135438452972e-07	-0.541810646518512	0.541	0.756	0.0278075443348358	1.32661670152476e-05	post-VDZ, non-responders vs responders (responders as reference)
mucosa	scRNAseq	ITGAM	DC2	responders	0.000344915120820366	-0.292913015377448	0.082	0.229	1	0.000919773655520977	post-VDZ, non-responders vs responders (responders as reference)
mucosa	scRNAseq	ITGA4	DC2	responders	0.000262554008882128	-0.434842450583895	0.489	0.687	1	0.000840172828422808	post-VDZ, non-responders vs responders (responders as reference)
mucosa	scRNAseq	ITGAX	DC2	responders	0.000180439028151274	-0.20131552278057	0.444	0.656	1	0.000721756112605098	post-VDZ, non-responders vs responders (responders as reference)
mucosa	scRNAseq	PECAM1	DC2	responders	9.52878348519527e-05	-0.248367971841673	0.123	0.305	1	0.000508201785877081	post-VDZ, non-responders vs responders (responders as reference)
mucosa	scRNAseq	ICAM1	DC2	non-responders	2.41292065989182e-06	0.682488257758375	0.649	0.466	0.0809245330914517	1.93033652791345e-05	post-VDZ, non-responders vs responders (responders as reference)
mucosa	scRNAseq	ITGB1	Follicular	non-responders	4.93132843807197e-09	0.472042286487327	0.272	0.178	0.000165386893156058	7.89012550091515e-08	post-VDZ, non-responders vs responders (responders as reference)
mucosa	scRNAseq	ITGB7	Follicular	responders	0.000983571288407117	-0.120839689985088	0.041	0.078	1	0.00786857030725694	post-VDZ, non-responders vs responders (responders as reference)
mucosa	scRNAseq	ITGB1	GC	non-responders	1.14249743519517e-07	0.0516745954326583	0.322	0.465	0.00383170789815757	1.82799589631228e-06	post-VDZ, non-responders vs responders (responders as reference)
mucosa	scRNAseq	ITGB2	GC	non-responders	0.000168563477321278	0.150978984065252	0.337	0.402	1	0.000642030339888839	post-VDZ, non-responders vs responders (responders as reference)
mucosa	scRNAseq	ITGA4	GC	non-responders	0.00016023518279453	0.180879726122065	0.261	0.328	1	0.000642030339888839	post-VDZ, non-responders vs responders (responders as reference)
mucosa	scRNAseq	ITGAE	GC	responders	5.0995810660457e-05	-0.197436178248042	0.348	0.502	1	0.000407966485283656	post-VDZ, non-responders vs responders (responders as reference)
mucosa	scRNAseq	ITGAL	GC	responders	0.000200634481215262	-0.147316399236719	0.199	0.322	1	0.000642030339888839	post-VDZ, non-responders vs responders (responders as reference)
mucosa	scRNAseq	ICAM1	GC	non-responders	0.00971923785309936	0.173213890042118	0.196	0.207	1	0.025917967608265	post-VDZ, non-responders vs responders (responders as reference)
mucosa	scRNAseq	ITGB1	Ig negative	responders	2.77765253724746e-05	-0.214404775500022	0.227	0.131	0.931569107942052	0.000148141468653198	post-VDZ, non-responders vs responders (responders as reference)
mucosa	scRNAseq	ITGAE	Ig negative	non-responders	0.0103088718301403	0.120631125149404	0.115	0.044	1	0.0329883898564489	post-VDZ, non-responders vs responders (responders as reference)
mucosa	scRNAseq	ITGAX	Ig negative	non-responders	0.000289130766829899	0.557009706748443	0.044	0	1	0.00115652306731959	post-VDZ, non-responders vs responders (responders as reference)
mucosa	scRNAseq	PECAM1	Ig negative	non-responders	2.07522976770817e-08	0.420114704741339	0.336	0.117	0.000695990559493967	3.32036762833307e-07	post-VDZ, non-responders vs responders (responders as reference)
mucosa	scRNAseq	ICAM1	Ig negative	non-responders	4.68904663889469e-06	0.503931700545318	0.187	0.049	0.15726124617525	3.75123731111575e-05	post-VDZ, non-responders vs responders (responders as reference)
mucosa	scRNAseq	ITGA4	IgA	responders	1.09150505656339e-09	-0.183228133725477	0.286	0.355	3.6606896587023e-05	8.73204045250714e-09	post-VDZ, non-responders vs responders (responders as reference)
mucosa	scRNAseq	ITGB7	IgA	responders	4.39828632078534e-06	-0.0349993651296895	0.132	0.171	0.147509726626499	1.75931452831414e-05	post-VDZ, non-responders vs responders (responders as reference)
mucosa	scRNAseq	ITGAL	IgA	responders	1.16042735005264e-07	-0.0640738517488633	0.068	0.106	0.00389184124660653	6.1889458669474e-07	post-VDZ, non-responders vs responders (responders as reference)
mucosa	scRNAseq	PECAM1	IgA	non-responders	3.48497483600808e-29	0.281937895783006	0.273	0.184	1.16879086050039e-24	5.57595973761293e-28	post-VDZ, non-responders vs responders (responders as reference)
mucosa	scRNAseq	ITGB1	IgG	non-responders	2.17078363069254e-12	0.182056070908702	0.248	0.178	7.28037414061662e-08	8.68313452277014e-12	post-VDZ, non-responders vs responders (responders as reference)
mucosa	scRNAseq	ITGA4	IgG	responders	6.78362179925613e-20	-0.280622346564544	0.246	0.355	2.27509107903452e-15	3.61793162626994e-19	post-VDZ, non-responders vs responders (responders as reference)
mucosa	scRNAseq	ITGB7	IgG	responders	1.22546891869821e-23	-0.16423399771488	0.082	0.169	4.10997765953007e-19	9.80375134958571e-23	post-VDZ, non-responders vs responders (responders as reference)
mucosa	scRNAseq	ITGAL	IgG	responders	0.00123949874817212	-0.068438171392418	0.076	0.104	1	0.00330532999512566	post-VDZ, non-responders vs responders (responders as reference)
mucosa	scRNAseq	ITGAX	IgG	non-responders	0.00196826162294694	0.0406209252528357	0.013	0.004	1	0.004498883709593	post-VDZ, non-responders vs responders (responders as reference)
mucosa	scRNAseq	PECAM1	IgG	non-responders	2.54646563039183e-38	0.396070752313583	0.518	0.378	8.54033643120811e-34	4.07434500862693e-37	post-VDZ, non-responders vs responders (responders as reference)
mucosa	scRNAseq	ICAM1	IgG	non-responders	6.47975959126328e-06	0.129888756760241	0.224	0.172	0.217318177171788	2.07352306920425e-05	post-VDZ, non-responders vs responders (responders as reference)
mucosa	scRNAseq	ITGB1	Inflammatory monocytes	non-responders	0.0121973334793377	0.00386542571559367	0.424	0.32	1	0.0325262226115671	post-VDZ, non-responders vs responders (responders as reference)
mucosa	scRNAseq	ITGB2	Inflammatory monocytes	responders	6.43040510167433e-11	-0.967336396874232	0.466	0.607	2.15662926299954e-06	5.14432408133946e-10	post-VDZ, non-responders vs responders (responders as reference)
mucosa	scRNAseq	ITGA4	Inflammatory monocytes	responders	0.000244041222204843	-0.57477361626766	0.198	0.311	1	0.00097616488881937	post-VDZ, non-responders vs responders (responders as reference)
mucosa	scRNAseq	ITGAL	Inflammatory monocytes	responders	0.00304930620700772	-0.28715186905778	0.086	0.189	1	0.0097577798624247	post-VDZ, non-responders vs responders (responders as reference)
mucosa	scRNAseq	ITGAX	Inflammatory monocytes	non-responders	2.09841075119013e-07	0.408108544480179	0.653	0.393	0.00703764997734146	1.11915240063474e-06	post-VDZ, non-responders vs responders (responders as reference)
mucosa	scRNAseq	ICAM1	Inflammatory monocytes	non-responders	5.93788965403852e-18	1.15471796617086	0.796	0.443	1.99144943217144e-13	9.50062344646163e-17	post-VDZ, non-responders vs responders (responders as reference)
mucosa	scRNAseq	ITGB2	Tregs	responders	1.35243492545106e-05	-0.143220334152929	0.233	0.316	0.453579625297778	0.00021638958807217	post-VDZ, non-responders vs responders (responders as reference)
mucosa	scRNAseq	ITGA4	Tregs	non-responders	0.000211413805966212	0.056799363947182	0.344	0.399	1	0.00112754029848647	post-VDZ, non-responders vs responders (responders as reference)
mucosa	scRNAseq	ITGB7	Tregs	responders	0.000819837304458741	-0.105647329450518	0.011	0.035	1	0.00327934921783496	post-VDZ, non-responders vs responders (responders as reference)
mucosa	scRNAseq	ITGAL	Tregs	responders	0.000137371762490232	-0.172640695837434	0.224	0.303	1	0.00109897409992185	post-VDZ, non-responders vs responders (responders as reference)
mucosa	scRNAseq	ITGA4	CD4+ Activated Fos-hi	post-VDZ	2.26561467865288e-05	0.0967979859184516	0.258	0.269	0.759841850926602	0.00036249834858446	responders, post-VDZ vs pre-VDZ (pre-VDZ as reference)
mucosa	scRNAseq	ITGAL	CD4+ Activated Fos-hi	post-VDZ	0.00204536811050413	0.165211669205005	0.185	0.156	1	0.0124414028779851	responders, post-VDZ vs pre-VDZ (pre-VDZ as reference)
mucosa	scRNAseq	PECAM1	CD4+ Activated Fos-hi	pre-VDZ	0.0023327630396222	-0.0406585018127239	0.02	0.033	1	0.0124414028779851	responders, post-VDZ vs pre-VDZ (pre-VDZ as reference)
mucosa	scRNAseq	ITGA4	CD4+ Activated Fos-lo	post-VDZ	0.000203200981717904	0.828769651043977	0.183	0.136	1	0.00325121570748646	responders, post-VDZ vs pre-VDZ (pre-VDZ as reference)
mucosa	scRNAseq	ITGA4	CD8+ IL17+	post-VDZ	0.00677968619259084	0.0841744221436422	0.505	0.53	1	0.0361583263604845	responders, post-VDZ vs pre-VDZ (pre-VDZ as reference)
mucosa	scRNAseq	ITGAE	CD8+ IL17+	pre-VDZ	0.00301403572539372	-0.135487377951663	0.185	0.246	1	0.0241122858031498	responders, post-VDZ vs pre-VDZ (pre-VDZ as reference)
mucosa	scRNAseq	ICAM1	CD8+ IL17+	pre-VDZ	0.00124644894062527	-0.162114035023144	0.044	0.09	1	0.0199431830500043	responders, post-VDZ vs pre-VDZ (pre-VDZ as reference)
mucosa	scRNAseq	ICAM1	DC2	pre-VDZ	0.000497211543275836	-0.460432277155582	0.466	0.659	1	0.00795538469241338	responders, post-VDZ vs pre-VDZ (pre-VDZ as reference)
mucosa	scRNAseq	ITGB1	Follicular	post-VDZ	0.000538949278695938	0.238834457845732	0.178	0.128	1	0.00431159422956751	responders, post-VDZ vs pre-VDZ (pre-VDZ as reference)
mucosa	scRNAseq	ITGB7	Follicular	post-VDZ	0.00337591662630736	0.113801796641797	0.078	0.049	1	0.0180048886736393	responders, post-VDZ vs pre-VDZ (pre-VDZ as reference)
mucosa	scRNAseq	ITGAX	Follicular	post-VDZ	0.000167236241061125	0.14691317463483	0.077	0.042	1	0.002675779856978	responders, post-VDZ vs pre-VDZ (pre-VDZ as reference)
mucosa	scRNAseq	ITGB1	GC	post-VDZ	2.03260288508025e-09	0.371226487607504	0.465	0.29	6.81694355598214e-05	3.2521646161284e-08	responders, post-VDZ vs pre-VDZ (pre-VDZ as reference)
mucosa	scRNAseq	ITGB2	GC	post-VDZ	0.0165870575607737	0.184730601500678	0.402	0.323	1	0.0379132744246256	responders, post-VDZ vs pre-VDZ (pre-VDZ as reference)
mucosa	scRNAseq	ITGA4	GC	pre-VDZ	3.97046788925789e-06	-0.357235679609103	0.328	0.413	0.133161552069931	2.11758287427088e-05	responders, post-VDZ vs pre-VDZ (pre-VDZ as reference)
mucosa	scRNAseq	ITGAE	GC	post-VDZ	3.13509213999209e-07	0.311397350444296	0.502	0.35	0.0105144720191055	2.50807371199367e-06	responders, post-VDZ vs pre-VDZ (pre-VDZ as reference)
mucosa	scRNAseq	ITGAL	GC	post-VDZ	0.0112558608291419	0.13862484135593	0.322	0.246	1	0.0300156288777116	responders, post-VDZ vs pre-VDZ (pre-VDZ as reference)
mucosa	scRNAseq	PECAM1	GC	pre-VDZ	0.000635348850164268	-0.167179311144135	0.043	0.087	1	0.00254139540065707	responders, post-VDZ vs pre-VDZ (pre-VDZ as reference)
mucosa	scRNAseq	CDH1	GC	pre-VDZ	0.00348436904299964	-0.0394288427577854	0.023	0.059	1	0.0111499809375988	responders, post-VDZ vs pre-VDZ (pre-VDZ as reference)
mucosa	scRNAseq	VCAM1	GC	pre-VDZ	0.019087158738757	-0.0175514292236517	0	0.008	1	0.0381743174775139	responders, post-VDZ vs pre-VDZ (pre-VDZ as reference)
mucosa	scRNAseq	ITGB1	Ig negative	post-VDZ	4.12785254171196e-06	0.364808030248751	0.131	0.2	0.138439918543936	2.71890243803433e-05	responders, post-VDZ vs pre-VDZ (pre-VDZ as reference)
mucosa	scRNAseq	ITGB2	Ig negative	post-VDZ	0.00557473504248971	0.0227231285381964	0.039	0.09	1	0.0111494700849794	responders, post-VDZ vs pre-VDZ (pre-VDZ as reference)
mucosa	scRNAseq	ITGA3	Ig negative	pre-VDZ	0.0124898881386754	-0.176906639631287	0.01	0.048	1	0.0199838210218807	responders, post-VDZ vs pre-VDZ (pre-VDZ as reference)
mucosa	scRNAseq	ITGA4	Ig negative	post-VDZ	0.000151320022443774	0.0634816666444835	0.136	0.245	1	0.000605280089775096	responders, post-VDZ vs pre-VDZ (pre-VDZ as reference)
mucosa	scRNAseq	ITGB7	Ig negative	pre-VDZ	0.000880782349015134	-0.0547877423459228	0.053	0.14	1	0.00234875293070702	responders, post-VDZ vs pre-VDZ (pre-VDZ as reference)
mucosa	scRNAseq	ITGAE	Ig negative	pre-VDZ	5.09794207131436e-06	-0.19175738092177	0.044	0.171	0.170974781187741	2.71890243803433e-05	responders, post-VDZ vs pre-VDZ (pre-VDZ as reference)
mucosa	scRNAseq	ITGAL	Ig negative	pre-VDZ	0.00811761934592566	-0.0992052575916058	0.053	0.121	1	0.0144313232816456	responders, post-VDZ vs pre-VDZ (pre-VDZ as reference)
mucosa	scRNAseq	PECAM1	Ig negative	pre-VDZ	1.43779188123488e-06	-0.219718311186108	0.117	0.287	0.0482206641128554	2.30046700997581e-05	responders, post-VDZ vs pre-VDZ (pre-VDZ as reference)
mucosa	scRNAseq	CDH1	Ig negative	post-VDZ	0.000226775673170851	0.680535646694641	0.107	0.09	1	0.000725682154146725	responders, post-VDZ vs pre-VDZ (pre-VDZ as reference)
mucosa	scRNAseq	FN1	Ig negative	post-VDZ	0.0148394372255171	0.67606700146294	0.063	0.021	1	0.0215846359643886	responders, post-VDZ vs pre-VDZ (pre-VDZ as reference)
mucosa	scRNAseq	ICAM1	Ig negative	pre-VDZ	0.00122724695330701	-0.400743974476752	0.049	0.135	1	0.00280513589327316	responders, post-VDZ vs pre-VDZ (pre-VDZ as reference)
mucosa	scRNAseq	ITGB2	IgA	post-VDZ	3.48506554030204e-06	0.00176378984604289	0.07	0.086	0.11688212809065	1.11522097289665e-05	responders, post-VDZ vs pre-VDZ (pre-VDZ as reference)
mucosa	scRNAseq	ITGA4	IgA	post-VDZ	5.1402616109815e-27	0.257777152911128	0.355	0.304	1.72394093909097e-22	4.1122092887852e-26	responders, post-VDZ vs pre-VDZ (pre-VDZ as reference)
mucosa	scRNAseq	ITGB7	IgA	post-VDZ	0.00141451662468418	0.019660442497144	0.171	0.176	1	0.00323318085642099	responders, post-VDZ vs pre-VDZ (pre-VDZ as reference)
mucosa	scRNAseq	ITGAE	IgA	pre-VDZ	3.37448830055307e-09	-0.00258348607050662	0.142	0.172	0.000113173588623949	1.7997270936283e-08	responders, post-VDZ vs pre-VDZ (pre-VDZ as reference)
mucosa	scRNAseq	ITGAL	IgA	pre-VDZ	0.00060767910162805	-0.00703092791778306	0.106	0.123	1	0.00162047760434147	responders, post-VDZ vs pre-VDZ (pre-VDZ as reference)
mucosa	scRNAseq	PECAM1	IgA	pre-VDZ	1.31510752412695e-30	-0.17416486948306	0.184	0.276	4.41060761441696e-26	2.10417203860312e-29	responders, post-VDZ vs pre-VDZ (pre-VDZ as reference)
mucosa	scRNAseq	ICAM1	IgA	post-VDZ	1.33890465787784e-06	0.0797128271943404	0.186	0.187	0.0449041844159072	5.35561863151138e-06	responders, post-VDZ vs pre-VDZ (pre-VDZ as reference)
mucosa	scRNAseq	ITGB1	IgG	pre-VDZ	3.62374617145202e-09	-0.0452880458504119	0.178	0.243	0.000121533199098158	1.44949846858081e-08	responders, post-VDZ vs pre-VDZ (pre-VDZ as reference)
mucosa	scRNAseq	ITGB2	IgG	pre-VDZ	4.06857870242354e-06	-0.00393497539374163	0.109	0.145	0.136451992521881	8.13715740484708e-06	responders, post-VDZ vs pre-VDZ (pre-VDZ as reference)
mucosa	scRNAseq	ITGA1	IgG	pre-VDZ	5.88233948099653e-05	-0.00513602285004829	0.015	0.028	1	0.000104574924106605	responders, post-VDZ vs pre-VDZ (pre-VDZ as reference)
mucosa	scRNAseq	ITGA3	IgG	pre-VDZ	0.000268319326226742	-0.0187150186608921	0.03	0.05	1	0.000429310921962788	responders, post-VDZ vs pre-VDZ (pre-VDZ as reference)
mucosa	scRNAseq	ITGA4	IgG	post-VDZ	6.43325565011441e-08	0.129110800733949	0.355	0.378	0.00215758527993537	2.05864180803661e-07	responders, post-VDZ vs pre-VDZ (pre-VDZ as reference)
mucosa	scRNAseq	ITGB7	IgG	post-VDZ	0.00516378956577333	0.00999258823460664	0.169	0.197	1	0.00751096664112485	responders, post-VDZ vs pre-VDZ (pre-VDZ as reference)
mucosa	scRNAseq	ITGAE	IgG	pre-VDZ	2.50108479072703e-06	-0.0289862773361411	0.18	0.231	0.0838813817114032	5.7167652359475e-06	responders, post-VDZ vs pre-VDZ (pre-VDZ as reference)
mucosa	scRNAseq	ITGAL	IgG	post-VDZ	2.27071675420266e-07	0.00157382137350057	0.104	0.145	0.00761552985024487	6.05524467787375e-07	responders, post-VDZ vs pre-VDZ (pre-VDZ as reference)
mucosa	scRNAseq	PECAM1	IgG	pre-VDZ	2.20719160535708e-18	-0.183252074660852	0.378	0.494	7.40247920604656e-14	3.53150656857132e-17	responders, post-VDZ vs pre-VDZ (pre-VDZ as reference)
mucosa	scRNAseq	CDH1	IgG	post-VDZ	7.57001138924766e-10	8.57178935117775e-05	0.046	0.08	2.53883041972588e-05	4.03733940759875e-09	responders, post-VDZ vs pre-VDZ (pre-VDZ as reference)
mucosa	scRNAseq	ICAM1	IgG	pre-VDZ	3.4877226886302e-10	-0.0343244629271977	0.172	0.23	1.1697124353128e-05	2.79017815090416e-09	responders, post-VDZ vs pre-VDZ (pre-VDZ as reference)
mucosa	scRNAseq	MADCAM1	IgG	pre-VDZ	0.0309691614014132	-0.00498662640596644	0.005	0.01	1	0.0412922152018843	responders, post-VDZ vs pre-VDZ (pre-VDZ as reference)
mucosa	scRNAseq	PECAM1	IgM	pre-VDZ	0.00154812663246266	-0.124231091166668	0.146	0.256	1	0.0247700261194026	responders, post-VDZ vs pre-VDZ (pre-VDZ as reference)
mucosa	scRNAseq	ITGB1	Inflammatory monocytes	post-VDZ	0.0015773316589406	0.126394490067171	0.32	0.409	1	0.00630932663576239	responders, post-VDZ vs pre-VDZ (pre-VDZ as reference)
mucosa	scRNAseq	ITGB2	Inflammatory monocytes	post-VDZ	1.19973283136461e-08	0.647986709607359	0.607	0.643	0.000402366396983061	9.59786265091684e-08	responders, post-VDZ vs pre-VDZ (pre-VDZ as reference)
mucosa	scRNAseq	ITGAX	Inflammatory monocytes	pre-VDZ	5.97160104076403e-05	-0.0958120341029527	0.393	0.592	1	0.000318485388840748	responders, post-VDZ vs pre-VDZ (pre-VDZ as reference)
mucosa	scRNAseq	ICAM1	Inflammatory monocytes	pre-VDZ	1.3790048229312e-09	-0.812308358398479	0.443	0.731	4.62490637514666e-05	2.20640771668992e-08	responders, post-VDZ vs pre-VDZ (pre-VDZ as reference)
mucosa	scRNAseq	ICAM1	Macrophages	pre-VDZ	0.00287427170716592	-0.958418412432662	0.39	0.65	1	0.0459883473146547	responders, post-VDZ vs pre-VDZ (pre-VDZ as reference)
mucosa	scRNAseq	ITGB1	CD4+ Activated Fos-hi	post-VDZ	0.000104319767117892	0.309141635197036	0.155	0.11	1	0.000834558136943132	non-responders, post-VDZ vs pre-VDZ (pre-VDZ as reference)
mucosa	scRNAseq	ITGA1	CD4+ Activated Fos-hi	post-VDZ	2.71516168955564e-05	0.245630042398603	0.115	0.069	0.910610927443171	0.000434425870328903	non-responders, post-VDZ vs pre-VDZ (pre-VDZ as reference)
mucosa	scRNAseq	ITGAL	CD8+ IL17+	pre-VDZ	0.00292993794477355	-0.0366704614220391	0.279	0.227	1	0.0468790071163768	non-responders, post-VDZ vs pre-VDZ (pre-VDZ as reference)
mucosa	scRNAseq	ITGA4	CD8+ LP	pre-VDZ	0.000696966982031428	-0.0428875435754594	0.366	0.303	1	0.0111514717125028	non-responders, post-VDZ vs pre-VDZ (pre-VDZ as reference)
mucosa	scRNAseq	ITGB1	Follicular	post-VDZ	9.85923412828817e-30	0.637271895712836	0.272	0.103	3.30658994194529e-25	1.57747746052611e-28	non-responders, post-VDZ vs pre-VDZ (pre-VDZ as reference)
mucosa	scRNAseq	ITGB2	Follicular	post-VDZ	2.092950989493e-05	0.0822316424693718	0.151	0.102	0.701933902856163	8.37180395797201e-05	non-responders, post-VDZ vs pre-VDZ (pre-VDZ as reference)
mucosa	scRNAseq	ITGAM	Follicular	post-VDZ	0.0215111652711344	0.0954114469909028	0.034	0.017	1	0.0382420715931278	non-responders, post-VDZ vs pre-VDZ (pre-VDZ as reference)
mucosa	scRNAseq	ITGA4	Follicular	pre-VDZ	4.56169102704844e-08	-0.12276693968871	0.317	0.278	0.00152989993665151	3.64935282163875e-07	non-responders, post-VDZ vs pre-VDZ (pre-VDZ as reference)
mucosa	scRNAseq	ITGAE	Follicular	pre-VDZ	0.000129597189835049	-0.130241725766292	0.139	0.121	1	0.000345592506226797	non-responders, post-VDZ vs pre-VDZ (pre-VDZ as reference)
mucosa	scRNAseq	ITGAL	Follicular	post-VDZ	3.52951425428803e-05	0.0889993273735614	0.098	0.056	1	0.000112944456137217	non-responders, post-VDZ vs pre-VDZ (pre-VDZ as reference)
mucosa	scRNAseq	ITGAX	Follicular	post-VDZ	0.00332677748042469	0.0791420548216653	0.048	0.025	1	0.00760406281239929	non-responders, post-VDZ vs pre-VDZ (pre-VDZ as reference)
mucosa	scRNAseq	VCAM1	Follicular	post-VDZ	0.020353814022826	0.0326453242087669	0.003	0	1	0.0382420715931278	non-responders, post-VDZ vs pre-VDZ (pre-VDZ as reference)
mucosa	scRNAseq	ICAM1	Follicular	post-VDZ	8.27244336953923e-08	0.0859667602203291	0.146	0.09	0.00277441205727607	4.41196979708759e-07	non-responders, post-VDZ vs pre-VDZ (pre-VDZ as reference)
mucosa	scRNAseq	ITGB1	GC	post-VDZ	1.46267198282298e-06	0.616421421169624	0.322	0.151	0.049055092959917	2.34027517251676e-05	non-responders, post-VDZ vs pre-VDZ (pre-VDZ as reference)
mucosa	scRNAseq	ITGB2	GC	post-VDZ	1.18177791604046e-05	0.263721296321402	0.337	0.183	0.39634467748165	9.4542233283237e-05	non-responders, post-VDZ vs pre-VDZ (pre-VDZ as reference)
mucosa	scRNAseq	ITGA4	GC	pre-VDZ	0.0179519462070321	-0.320248245152998	0.261	0.294	1	0.044181493835955	non-responders, post-VDZ vs pre-VDZ (pre-VDZ as reference)
mucosa	scRNAseq	ITGAE	GC	pre-VDZ	0.00046704606631248	-0.137883334059433	0.348	0.268	1	0.00186818426524992	non-responders, post-VDZ vs pre-VDZ (pre-VDZ as reference)
mucosa	scRNAseq	ITGAL	GC	post-VDZ	0.000447370513155514	0.207021010226525	0.199	0.095	1	0.00186818426524992	non-responders, post-VDZ vs pre-VDZ (pre-VDZ as reference)
mucosa	scRNAseq	ITGAX	GC	post-VDZ	0.0193294035532303	0.0797081722994292	0.047	0.013	1	0.044181493835955	non-responders, post-VDZ vs pre-VDZ (pre-VDZ as reference)
mucosa	scRNAseq	ICAM1	GC	post-VDZ	0.00143761579844951	0.209765430563952	0.196	0.101	1	0.00460037055503844	non-responders, post-VDZ vs pre-VDZ (pre-VDZ as reference)
mucosa	scRNAseq	PECAM1	Ig negative	post-VDZ	0.000660236021358876	0.332584540034182	0.336	0.189	1	0.010563776341742	non-responders, post-VDZ vs pre-VDZ (pre-VDZ as reference)
mucosa	scRNAseq	CDH1	Ig negative	post-VDZ	0.00344773485909317	0.177792129804661	0.072	0.023	1	0.0275818788727453	non-responders, post-VDZ vs pre-VDZ (pre-VDZ as reference)
mucosa	scRNAseq	ITGB1	IgA	post-VDZ	0.00162045994759221	0.0500690522872722	0.135	0.105	1	0.0129636795807377	non-responders, post-VDZ vs pre-VDZ (pre-VDZ as reference)
mucosa	scRNAseq	PECAM1	IgA	post-VDZ	0.000147412044919503	0.115149746780841	0.273	0.231	1	0.00235859271871205	non-responders, post-VDZ vs pre-VDZ (pre-VDZ as reference)
mucosa	scRNAseq	ICAM1	IgA	pre-VDZ	0.00298705430564014	-0.063839693229259	0.189	0.173	1	0.0159309562967474	non-responders, post-VDZ vs pre-VDZ (pre-VDZ as reference)
mucosa	scRNAseq	ITGB1	IgG	post-VDZ	7.90815124087418e-19	0.148520596926002	0.248	0.153	2.65223576316438e-14	6.32652099269934e-18	non-responders, post-VDZ vs pre-VDZ (pre-VDZ as reference)
mucosa	scRNAseq	ITGB2	IgG	pre-VDZ	0.0281676782002885	-0.0469666709003004	0.095	0.114	1	0.0409711682913288	non-responders, post-VDZ vs pre-VDZ (pre-VDZ as reference)
mucosa	scRNAseq	ITGA4	IgG	pre-VDZ	2.22611112494508e-09	-0.155051992959903	0.246	0.248	7.46593149084082e-05	8.90444449978033e-09	non-responders, post-VDZ vs pre-VDZ (pre-VDZ as reference)
mucosa	scRNAseq	ITGB7	IgG	pre-VDZ	6.22141238735226e-09	-0.11843709814081	0.082	0.117	0.00020865372864702	1.99085196395272e-08	non-responders, post-VDZ vs pre-VDZ (pre-VDZ as reference)
mucosa	scRNAseq	ITGAE	IgG	pre-VDZ	1.62582183697704e-10	-0.0926236116162139	0.2	0.185	5.45268127685361e-06	8.67104979721089e-10	non-responders, post-VDZ vs pre-VDZ (pre-VDZ as reference)
mucosa	scRNAseq	ITGAL	IgG	pre-VDZ	0.000152616492540546	-0.0842571942777493	0.076	0.087	1	0.000321845131282006	non-responders, post-VDZ vs pre-VDZ (pre-VDZ as reference)
mucosa	scRNAseq	ITGAX	IgG	post-VDZ	0.00408631061018704	0.0287003501397947	0.013	0.005	1	0.00726455219588807	non-responders, post-VDZ vs pre-VDZ (pre-VDZ as reference)
mucosa	scRNAseq	PECAM1	IgG	post-VDZ	3.92466402647539e-23	0.119424771967986	0.518	0.391	1.31625382119932e-18	6.27946244236063e-22	non-responders, post-VDZ vs pre-VDZ (pre-VDZ as reference)
mucosa	scRNAseq	CDH1	IgG	pre-VDZ	0.000160922565641003	-0.0187971398432994	0.059	0.042	1	0.000321845131282006	non-responders, post-VDZ vs pre-VDZ (pre-VDZ as reference)
mucosa	scRNAseq	FN1	IgG	post-VDZ	0.00936361404229261	0.0275966797888712	0.019	0.01	1	0.0149817824676682	non-responders, post-VDZ vs pre-VDZ (pre-VDZ as reference)
mucosa	scRNAseq	ICAM1	IgG	pre-VDZ	9.58906230849205e-08	-0.0109156672011131	0.224	0.178	0.00321597971702206	2.55708328226455e-07	non-responders, post-VDZ vs pre-VDZ (pre-VDZ as reference)
mucosa	scRNAseq	ITGB1	IgM	post-VDZ	0.000601782102146705	0.2790990778408	0.184	0.066	1	0.00962851363434728	non-responders, post-VDZ vs pre-VDZ (pre-VDZ as reference)
mucosa	scRNAseq	ITGB1	Inflammatory monocytes	pre-VDZ	1.00643174878698e-08	-0.00523276454749011	0.424	0.309	0.000337537079908176	4.0257269951479e-08	non-responders, post-VDZ vs pre-VDZ (pre-VDZ as reference)
mucosa	scRNAseq	ITGB2	Inflammatory monocytes	pre-VDZ	6.83019604417105e-15	-0.679333742822165	0.466	0.512	2.29071114929409e-10	3.64277122355789e-14	non-responders, post-VDZ vs pre-VDZ (pre-VDZ as reference)
mucosa	scRNAseq	ITGAM	Inflammatory monocytes	pre-VDZ	0.0120362888472167	-0.181756742422642	0.208	0.193	1	0.0240725776944334	non-responders, post-VDZ vs pre-VDZ (pre-VDZ as reference)
mucosa	scRNAseq	ITGA4	Inflammatory monocytes	pre-VDZ	0.000232407217201792	-0.380888243300018	0.198	0.226	1	0.000619752579204778	non-responders, post-VDZ vs pre-VDZ (pre-VDZ as reference)
mucosa	scRNAseq	ITGAL	Inflammatory monocytes	pre-VDZ	0.00857469049645485	-0.0815985497435444	0.086	0.066	1	0.0195992925633254	non-responders, post-VDZ vs pre-VDZ (pre-VDZ as reference)
mucosa	scRNAseq	ITGAX	Inflammatory monocytes	post-VDZ	3.81545358971512e-15	0.0404537408763788	0.653	0.479	1.27962682491866e-10	3.0523628717721e-14	non-responders, post-VDZ vs pre-VDZ (pre-VDZ as reference)
mucosa	scRNAseq	PECAM1	Inflammatory monocytes	pre-VDZ	5.14902786203187e-06	-0.382387341736503	0.253	0.248	0.172688096436825	1.6476889158502e-05	non-responders, post-VDZ vs pre-VDZ (pre-VDZ as reference)
mucosa	scRNAseq	ICAM1	Inflammatory monocytes	post-VDZ	3.87375875602203e-45	0.670164100530494	0.796	0.485	1.29918121159467e-40	6.19801400963525e-44	non-responders, post-VDZ vs pre-VDZ (pre-VDZ as reference)
mucosa	scRNAseq	ITGB2	NKs	post-VDZ	0.000925414618480769	0.321232607410267	0.388	0.218	1	0.0148066338956923	non-responders, post-VDZ vs pre-VDZ (pre-VDZ as reference)
mucosa	scRNAseq	ITGB1	Tregs	post-VDZ	1.98285232626761e-05	0.0361175323064237	0.21	0.152	0.665009013183631	0.000317256372202818	non-responders, post-VDZ vs pre-VDZ (pre-VDZ as reference)
mucosa	scRNAseq	ITGB2	Tregs	pre-VDZ	0.000104239242391094	-0.11797583958063	0.233	0.197	1	0.000833913939128751	non-responders, post-VDZ vs pre-VDZ (pre-VDZ as reference)
mucosa	scRNAseq	ITGA4	Tregs	post-VDZ	0.000296143589555081	0.158460912127248	0.344	0.27	1	0.0015794324776271	non-responders, post-VDZ vs pre-VDZ (pre-VDZ as reference)
mucosa	scRNAseq	ITGAE	Tregs	pre-VDZ	0.00094261569400847	-0.148657325147261	0.16	0.137	1	0.00377046277603388	non-responders, post-VDZ vs pre-VDZ (pre-VDZ as reference)
mucosa	scRNAseq	ITGAL	Tregs	post-VDZ	0.00577529400160118	0.0361508758458342	0.224	0.181	1	0.0184809408051238	non-responders, post-VDZ vs pre-VDZ (pre-VDZ as reference)

## Sheet: Supplementary Table 6
Supplementary Table 6
Ratios of b7+ immune cells in peripheral blood relative to gut mucosa
This table provides additional detailed data pertaining to Extended Data Figure 3e,f
VDZ, vedolizumab; pre-VDZ, study time point of 2 weeks prior to start of vedolizumab treatment; post-VDZ, study time point of 14 weeks after the start of vedolizumab treatment; PGA, Physician global assessment
PBMC/mucpsa scRNAseq											Statistics for ratio_pbmc/mucosa scRNAseq
patient	technique	response	time point	celltype	proportion_mucosa	proportion_pbmc	ratio_pbmc/mucosa	neg_log2_ratio_log			technique	celltype	p-value (Wilcoxon rank test)	comparison; condition
1	scRNAseq	VDZ-R	pre-VDZ	B	0.0519031	0.101351	1.9527	-0.965472			scRNAseq	B	0.5791	VDZ-NR vs VDZ-R; pre-VDZ
2	scRNAseq	VDZ-R	pre-VDZ	B	0.075	0.125	1.66667	-0.736966			scRNAseq	B	0.100412	post-VDZ vs pre-VDZ; VDZ-NR
4	scRNAseq	VDZ-R	pre-VDZ	B	0.0816327	0.0857143	1.05	-0.0703893			scRNAseq	B	0.145032	VDZ-NR vs VDZ-R; post-VDZ
5	scRNAseq	VDZ-R	pre-VDZ	B	0.0802139	0.0454545	0.566667	0.819428			scRNAseq	B	0.164384	post-VDZ vs pre-VDZ; VDZ-R
8	scRNAseq	VDZ-R	pre-VDZ	B	0.0804598	0.1	1.24286	-0.31366			scRNAseq	CD4T	0.421215	VDZ-NR vs VDZ-R; pre-VDZ
10	scRNAseq	VDZ-R	pre-VDZ	B	0.0470163	0.111111	2.36325	-1.24077			scRNAseq	CD4T	0.306875	post-VDZ vs pre-VDZ; VDZ-NR
11	scRNAseq	VDZ-R	pre-VDZ	B	0.0428571	0.0666667	1.55556	-0.63743			scRNAseq	CD4T	0.183215	VDZ-NR vs VDZ-R; post-VDZ
16	scRNAseq	VDZ-R	pre-VDZ	B	0.0120482	0.0439771	3.6501	-1.86793			scRNAseq	CD4T	0.247454	post-VDZ vs pre-VDZ; VDZ-R
17	scRNAseq	VDZ-R	pre-VDZ	B	0.0530973	0.0574713	1.08238	-0.114201			scRNAseq	CD8T	0.364096	VDZ-NR vs VDZ-R; pre-VDZ
18	scRNAseq	VDZ-R	pre-VDZ	B	0.0111111	0.176471	15.8824	-3.98935			scRNAseq	CD8T	0.902523	post-VDZ vs pre-VDZ; VDZ-NR
19	scRNAseq	VDZ-R	pre-VDZ	B	0.0702479	0.0416667	0.593137	0.753562			scRNAseq	CD8T	0.776814	VDZ-NR vs VDZ-R; post-VDZ
22	scRNAseq	VDZ-R	pre-VDZ	B	0.0151515	0.114943	7.58621	-2.92338			scRNAseq	CD8T	0.323214	post-VDZ vs pre-VDZ; VDZ-R
23	scRNAseq	VDZ-R	pre-VDZ	B	0.0348837	0.141593	4.059	-2.02112			scRNAseq	DC	0.832339	VDZ-NR vs VDZ-R; pre-VDZ
1	scRNAseq	VDZ-R	pre-VDZ	CD4T	0.0229885	0.110106	4.78959	-2.2599			scRNAseq	DC	0.776814	post-VDZ vs pre-VDZ; VDZ-NR
2	scRNAseq	VDZ-R	pre-VDZ	CD4T	0.0757238	0.0787992	1.04061	-0.0574345			scRNAseq	DC	0.902523	VDZ-NR vs VDZ-R; post-VDZ
4	scRNAseq	VDZ-R	pre-VDZ	CD4T	0.0430809	0.1239	2.87599	-1.52406			scRNAseq	DC	0.89393	post-VDZ vs pre-VDZ; VDZ-R
5	scRNAseq	VDZ-R	pre-VDZ	CD4T	0.0708661	0.052071	0.73478	0.444616			scRNAseq	ILC	1	VDZ-NR vs VDZ-R; post-VDZ
7	scRNAseq	VDZ-R	pre-VDZ	CD4T	0.0408163	0.1	2.45	-1.29278			scRNAseq	ILC	0.540291	post-VDZ vs pre-VDZ; VDZ-R
8	scRNAseq	VDZ-R	pre-VDZ	CD4T	0.0810811	0.125618	1.54929	-0.631608			scRNAseq	monocyte	0.516868	VDZ-NR vs VDZ-R; pre-VDZ
10	scRNAseq	VDZ-R	pre-VDZ	CD4T	0.036961	0.0756705	2.04731	-1.03373			scRNAseq	monocyte	0.749119	post-VDZ vs pre-VDZ; VDZ-NR
11	scRNAseq	VDZ-R	pre-VDZ	CD4T	0.0363636	0.0537634	1.47849	-0.564129			scRNAseq	monocyte	0.337356	VDZ-NR vs VDZ-R; post-VDZ
12	scRNAseq	VDZ-R	pre-VDZ	CD4T	0.0340909	0.126678	3.71588	-1.89371			scRNAseq	monocyte	0.175326	post-VDZ vs pre-VDZ; VDZ-R
16	scRNAseq	VDZ-R	pre-VDZ	CD4T	0.0367893	0.0420339	1.14256	-0.192267			scRNAseq	NK	0.350648	VDZ-NR vs VDZ-R; pre-VDZ
17	scRNAseq	VDZ-R	pre-VDZ	CD4T	0.0431655	0.106236	2.46112	-1.29932			scRNAseq	NK	0.17791	post-VDZ vs pre-VDZ; VDZ-NR
18	scRNAseq	VDZ-R	pre-VDZ	CD4T	0.0525424	0.0916179	1.7437	-0.802149			scRNAseq	NK	0.849769	VDZ-NR vs VDZ-R; post-VDZ
19	scRNAseq	VDZ-R	pre-VDZ	CD4T	0.0393701	0.0437262	1.11065	-0.1514			scRNAseq	NK	0.0567382	post-VDZ vs pre-VDZ; VDZ-R
22	scRNAseq	VDZ-R	pre-VDZ	CD4T	0.0485934	0.0541667	1.11469	-0.156646			scRNAseq	plasma	0.856327	VDZ-NR vs VDZ-R; pre-VDZ
23	scRNAseq	VDZ-R	pre-VDZ	CD4T	0.0261438	0.0490798	1.8773	-0.90866			scRNAseq	plasma	0.27249	post-VDZ vs pre-VDZ; VDZ-NR
1	scRNAseq	VDZ-R	pre-VDZ	CD8T	0.0694444	0.164009	2.36173	-1.23984			scRNAseq	plasma	0.450982	VDZ-NR vs VDZ-R; post-VDZ
2	scRNAseq	VDZ-R	pre-VDZ	CD8T	0.154639	0.0686567	0.44398	1.17143			scRNAseq	plasma	0.353934	post-VDZ vs pre-VDZ; VDZ-R
4	scRNAseq	VDZ-R	pre-VDZ	CD8T	0.0726073	0.165094	2.2738	-1.1851			scRNAseq	T_other	0.453255	VDZ-NR vs VDZ-R; pre-VDZ
5	scRNAseq	VDZ-R	pre-VDZ	CD8T	0.150538	0.0424028	0.281676	1.82789			scRNAseq	T_other	1	post-VDZ vs pre-VDZ; VDZ-NR
8	scRNAseq	VDZ-R	pre-VDZ	CD8T	0.126316	0.100962	0.799279	0.323229			scRNAseq	T_other	0.723674	VDZ-NR vs VDZ-R; post-VDZ
10	scRNAseq	VDZ-R	pre-VDZ	CD8T	0.0581395	0.05625	0.9675	0.0476664			scRNAseq	T_other	0.453255	post-VDZ vs pre-VDZ; VDZ-R
11	scRNAseq	VDZ-R	pre-VDZ	CD8T	0.0410959	0.129464	3.1503	-1.65549
12	scRNAseq	VDZ-R	pre-VDZ	CD8T	0.122807	0.141813	1.15476	-0.207595
16	scRNAseq	VDZ-R	pre-VDZ	CD8T	0.0566038	0.0638298	1.12766	-0.173332
17	scRNAseq	VDZ-R	pre-VDZ	CD8T	0.102703	0.146045	1.42201	-0.507935
18	scRNAseq	VDZ-R	pre-VDZ	CD8T	0.105528	0.0645161	0.611367	0.709889
19	scRNAseq	VDZ-R	pre-VDZ	CD8T	0.0755396	0.0703125	0.930804	0.103451
22	scRNAseq	VDZ-R	pre-VDZ	CD8T	0.0469799	0.0566667	1.20619	-0.270458
23	scRNAseq	VDZ-R	pre-VDZ	CD8T	0.0276243	0.0847458	3.0678	-1.6172
1	scRNAseq	VDZ-R	pre-VDZ	DC	0.0666667	0.411765	6.17647	-2.62678
2	scRNAseq	VDZ-R	pre-VDZ	DC	0.0857143	1	11.6667	-3.54432
4	scRNAseq	VDZ-R	pre-VDZ	DC	0.146341	0.37931	2.59195	-1.37404
10	scRNAseq	VDZ-R	pre-VDZ	DC	0.217391	0.25	1.15	-0.201634
12	scRNAseq	VDZ-R	pre-VDZ	DC	0.105263	0.314286	2.98571	-1.57808
16	scRNAseq	VDZ-R	pre-VDZ	DC	0.0769231	0.151515	1.9697	-0.977974
19	scRNAseq	VDZ-R	pre-VDZ	DC	0.275862	0.222222	0.805556	0.311944
22	scRNAseq	VDZ-R	pre-VDZ	DC	0.047619	0.37037	7.77778	-2.95936
23	scRNAseq	VDZ-R	pre-VDZ	DC	0.0769231	0.102564	1.33333	-0.415037
4	scRNAseq	VDZ-R	pre-VDZ	ILC	0.25	0.0909091	0.363636	1.45943
5	scRNAseq	VDZ-R	pre-VDZ	ILC	0.2	0.0909091	0.454545	1.1375
1	scRNAseq	VDZ-R	pre-VDZ	monocyte	0.0555556	0.0434783	0.782609	0.353637
2	scRNAseq	VDZ-R	pre-VDZ	monocyte	0.0454545	0.0666667	1.46667	-0.552541
4	scRNAseq	VDZ-R	pre-VDZ	monocyte	0.0440678	0.0891304	2.02258	-1.01619
7	scRNAseq	VDZ-R	pre-VDZ	monocyte	0.333333	0.166667	0.5	1
10	scRNAseq	VDZ-R	pre-VDZ	monocyte	0.0645161	0.0384615	0.596154	0.746243
12	scRNAseq	VDZ-R	pre-VDZ	monocyte	0.00961538	0.0321782	3.34653	-1.74267
19	scRNAseq	VDZ-R	pre-VDZ	monocyte	0.0512821	0.0369881	0.721268	0.471392
22	scRNAseq	VDZ-R	pre-VDZ	monocyte	0.0434783	0.0340136	0.782313	0.354182
23	scRNAseq	VDZ-R	pre-VDZ	monocyte	0.0322581	0.0406504	1.26016	-0.33361
1	scRNAseq	VDZ-R	pre-VDZ	NK	0.111111	0.214286	1.92857	-0.947533
2	scRNAseq	VDZ-R	pre-VDZ	NK	0.307692	0.0714286	0.232143	2.10692
4	scRNAseq	VDZ-R	pre-VDZ	NK	0.0625	0.277778	4.44444	-2.152
5	scRNAseq	VDZ-R	pre-VDZ	NK	0.105263	0.0833333	0.791667	0.337035
7	scRNAseq	VDZ-R	pre-VDZ	NK	0.2	0.133333	0.666667	0.584963
10	scRNAseq	VDZ-R	pre-VDZ	NK	0.153846	0.11976	0.778443	0.361336
11	scRNAseq	VDZ-R	pre-VDZ	NK	0.125	0.1	0.8	0.321928
17	scRNAseq	VDZ-R	pre-VDZ	NK	0.222222	0.27027	1.21622	-0.2824
22	scRNAseq	VDZ-R	pre-VDZ	NK	0.1875	0.136	0.725333	0.463284
1	scRNAseq	VDZ-R	pre-VDZ	plasma	0.0674603	0.533333	7.90588	-2.98293
2	scRNAseq	VDZ-R	pre-VDZ	plasma	0.12782	1	7.82353	-2.96782
4	scRNAseq	VDZ-R	pre-VDZ	plasma	0.100798	0.666667	6.61391	-2.7255
5	scRNAseq	VDZ-R	pre-VDZ	plasma	0.167491	0.4	2.38819	-1.25592
7	scRNAseq	VDZ-R	pre-VDZ	plasma	0.200521	1	4.98701	-2.31818
8	scRNAseq	VDZ-R	pre-VDZ	plasma	0.0743134	0.727273	9.78656	-3.2908
10	scRNAseq	VDZ-R	pre-VDZ	plasma	0.141268	0.662651	4.69073	-2.22981
12	scRNAseq	VDZ-R	pre-VDZ	plasma	0.115809	0.823529	7.11111	-2.83007
16	scRNAseq	VDZ-R	pre-VDZ	plasma	0.0800781	0.405405	5.06262	-2.33989
17	scRNAseq	VDZ-R	pre-VDZ	plasma	0.115063	0.754717	6.55918	-2.71351
19	scRNAseq	VDZ-R	pre-VDZ	plasma	0.0981735	0.571429	5.8206	-2.54117
22	scRNAseq	VDZ-R	pre-VDZ	plasma	0.0921986	0.333333	3.61538	-1.85415
23	scRNAseq	VDZ-R	pre-VDZ	plasma	0.0984183	0.615385	6.25275	-2.64449
1	scRNAseq	VDZ-R	pre-VDZ	T_other	1	0.181818	0.181818	2.45943
4	scRNAseq	VDZ-R	pre-VDZ	T_other	0.5	0.166667	0.333333	1.58496
5	scRNAseq	VDZ-R	pre-VDZ	T_other	0.166667	0.0555556	0.333333	1.58496
10	scRNAseq	VDZ-R	pre-VDZ	T_other	0.0833333	0.0888889	1.06667	-0.0931094
19	scRNAseq	VDZ-R	pre-VDZ	T_other	0.2	0.078125	0.390625	1.35614
23	scRNAseq	VDZ-R	pre-VDZ	T_other	0.230769	0.0333333	0.144444	2.79141
1	scRNAseq	VDZ-R	post-VDZ	B	0.0769231	0.049505	0.643564	0.635844
2	scRNAseq	VDZ-R	post-VDZ	B	0.0838323	0.126582	1.50995	-0.594497
4	scRNAseq	VDZ-R	post-VDZ	B	0.105263	0.0909091	0.863636	0.211504
5	scRNAseq	VDZ-R	post-VDZ	B	0.05	0.159664	3.19328	-1.67504
8	scRNAseq	VDZ-R	post-VDZ	B	0.117978	0.110345	0.935304	0.0964931
10	scRNAseq	VDZ-R	post-VDZ	B	0.115385	0.0514706	0.446078	1.16463
16	scRNAseq	VDZ-R	post-VDZ	B	0.0909091	0.125	1.375	-0.459432
17	scRNAseq	VDZ-R	post-VDZ	B	0.017094	0.1	5.85	-2.54844
19	scRNAseq	VDZ-R	post-VDZ	B	0.033557	0.0382653	1.14031	-0.189421
22	scRNAseq	VDZ-R	post-VDZ	B	0.0533981	0.0487805	0.913525	0.130483
23	scRNAseq	VDZ-R	post-VDZ	B	0.116279	0.163043	1.40217	-0.487665
1	scRNAseq	VDZ-R	post-VDZ	CD4T	0.03125	0.11087	3.54783	-1.82694
2	scRNAseq	VDZ-R	post-VDZ	CD4T	0.0890585	0.15139	1.6999	-0.765447
4	scRNAseq	VDZ-R	post-VDZ	CD4T	0.0677291	0.128205	1.89291	-0.920607
5	scRNAseq	VDZ-R	post-VDZ	CD4T	0.0333333	0.0715373	2.14612	-1.10173
7	scRNAseq	VDZ-R	post-VDZ	CD4T	0.0361446	0.0833333	2.30556	-1.20511
8	scRNAseq	VDZ-R	post-VDZ	CD4T	0.0469565	0.0732044	1.55898	-0.640605
10	scRNAseq	VDZ-R	post-VDZ	CD4T	0.0206186	0.103093	5	-2.32193
11	scRNAseq	VDZ-R	post-VDZ	CD4T	0.0111111	0.0991957	8.92761	-3.15827
12	scRNAseq	VDZ-R	post-VDZ	CD4T	0.0816327	0.106885	1.30934	-0.388844
16	scRNAseq	VDZ-R	post-VDZ	CD4T	0.0277778	0.075188	2.70677	-1.43657
17	scRNAseq	VDZ-R	post-VDZ	CD4T	0.0265152	0.109756	4.13937	-2.04941
19	scRNAseq	VDZ-R	post-VDZ	CD4T	0.0360656	0.042328	1.17364	-0.230991
22	scRNAseq	VDZ-R	post-VDZ	CD4T	0.0433735	0.0508167	1.17161	-0.228489
23	scRNAseq	VDZ-R	post-VDZ	CD4T	0.0506329	0.0609244	1.20326	-0.266944
1	scRNAseq	VDZ-R	post-VDZ	CD8T	0.24	0.121037	0.504323	0.987581
2	scRNAseq	VDZ-R	post-VDZ	CD8T	0.119355	0.150094	1.25754	-0.330607
4	scRNAseq	VDZ-R	post-VDZ	CD8T	0.123348	0.111111	0.900794	0.150731
5	scRNAseq	VDZ-R	post-VDZ	CD8T	0.163265	0.0778443	0.476796	1.06855
7	scRNAseq	VDZ-R	post-VDZ	CD8T	0.0963855	0.0227273	0.235795	2.08439
8	scRNAseq	VDZ-R	post-VDZ	CD8T	0.13617	0.107438	0.788998	0.341907
10	scRNAseq	VDZ-R	post-VDZ	CD8T	0.0851064	0.0816327	0.959184	0.060121
11	scRNAseq	VDZ-R	post-VDZ	CD8T	0.0232558	0.0854701	3.67521	-1.87783
12	scRNAseq	VDZ-R	post-VDZ	CD8T	0.217391	0.100496	0.462283	1.11315
16	scRNAseq	VDZ-R	post-VDZ	CD8T	0.0722892	0.125	1.72917	-0.790077
17	scRNAseq	VDZ-R	post-VDZ	CD8T	0.0748663	0.148673	1.98584	-0.98975
19	scRNAseq	VDZ-R	post-VDZ	CD8T	0.0576923	0.0339806	0.588997	0.763668
22	scRNAseq	VDZ-R	post-VDZ	CD8T	0.0805861	0.0534351	0.663081	0.592743
23	scRNAseq	VDZ-R	post-VDZ	CD8T	0.0540541	0.077193	1.42807	-0.514067
2	scRNAseq	VDZ-R	post-VDZ	DC	0.107143	0.472222	4.40741	-2.13993
5	scRNAseq	VDZ-R	post-VDZ	DC	0.125	0.285714	2.28571	-1.19265
8	scRNAseq	VDZ-R	post-VDZ	DC	0.157895	0.212121	1.34343	-0.425926
17	scRNAseq	VDZ-R	post-VDZ	DC	0.111111	0.3	2.7	-1.43296
19	scRNAseq	VDZ-R	post-VDZ	DC	0.0769231	0.31746	4.12698	-2.04509
22	scRNAseq	VDZ-R	post-VDZ	ILC	0.153846	0.333333	2.16667	-1.11548
2	scRNAseq	VDZ-R	post-VDZ	monocyte	0.3	0.0562771	0.18759	2.41434
10	scRNAseq	VDZ-R	post-VDZ	monocyte	0.0408163	0.0419847	1.02863	-0.0407185
12	scRNAseq	VDZ-R	post-VDZ	monocyte	0.04	0.0326087	0.815217	0.294743
17	scRNAseq	VDZ-R	post-VDZ	monocyte	0.111111	0.0947867	0.853081	0.229246
19	scRNAseq	VDZ-R	post-VDZ	monocyte	0.0666667	0.0273973	0.410959	1.28293
22	scRNAseq	VDZ-R	post-VDZ	monocyte	0.0909091	0.0124688	0.137157	2.8661
2	scRNAseq	VDZ-R	post-VDZ	NK	0.318182	0.140625	0.441964	1.178
8	scRNAseq	VDZ-R	post-VDZ	NK	0.272727	0.0588235	0.215686	2.21299
10	scRNAseq	VDZ-R	post-VDZ	NK	0.5	0.217391	0.434783	1.20163
12	scRNAseq	VDZ-R	post-VDZ	NK	0.25	0.14	0.56	0.836501
16	scRNAseq	VDZ-R	post-VDZ	NK	0.0714286	0.0285714	0.4	1.32193
17	scRNAseq	VDZ-R	post-VDZ	NK	0.272727	0.205479	0.753425	0.408465
22	scRNAseq	VDZ-R	post-VDZ	NK	0.0666667	0.0803571	1.20536	-0.269461
1	scRNAseq	VDZ-R	post-VDZ	plasma	0.146552	1	6.82353	-2.77052
2	scRNAseq	VDZ-R	post-VDZ	plasma	0.107456	0.666667	6.20408	-2.63322
5	scRNAseq	VDZ-R	post-VDZ	plasma	0.228417	0.8	3.50236	-1.80833
8	scRNAseq	VDZ-R	post-VDZ	plasma	0.134106	1	7.45679	-2.89855
10	scRNAseq	VDZ-R	post-VDZ	plasma	0.043771	0.4	9.13846	-3.19195
11	scRNAseq	VDZ-R	post-VDZ	plasma	0.030303	0.714286	23.5714	-4.55897
12	scRNAseq	VDZ-R	post-VDZ	plasma	0.119403	0.5	4.1875	-2.06609
17	scRNAseq	VDZ-R	post-VDZ	plasma	0.0912698	0.25	2.73913	-1.45372
19	scRNAseq	VDZ-R	post-VDZ	plasma	0.0703125	0.6	8.53333	-3.09311
22	scRNAseq	VDZ-R	post-VDZ	plasma	0.0832073	0.555556	6.67677	-2.73915
23	scRNAseq	VDZ-R	post-VDZ	plasma	0.0753247	1	13.2759	-3.73073
8	scRNAseq	VDZ-R	post-VDZ	T_other	0.0833333	0.0862069	1.03448	-0.0489096
6	scRNAseq	VDZ-NR	pre-VDZ	CD4T	0.0666667	0.0488246	0.732369	0.449358
6	scRNAseq	VDZ-NR	pre-VDZ	CD8T	0.285714	0.0479042	0.167665	2.57635
9	scRNAseq	VDZ-NR	pre-VDZ	B	0.0320513	0.0517241	1.61379	-0.690456
13	scRNAseq	VDZ-NR	pre-VDZ	B	0.0454545	0.0550459	1.21101	-0.27621
15	scRNAseq	VDZ-NR	pre-VDZ	B	0.0833333	0.0369318	0.443182	1.17403
20	scRNAseq	VDZ-NR	pre-VDZ	B	0.0214669	0.101266	4.7173	-2.23796
21	scRNAseq	VDZ-NR	pre-VDZ	B	0.0231788	0.0434783	1.87578	-0.907488
24	scRNAseq	VDZ-NR	pre-VDZ	B	0.0603175	0.0558824	0.926471	0.110183
3	scRNAseq	VDZ-NR	pre-VDZ	B	0.0595238	0.136986	2.30137	-1.20249
9	scRNAseq	VDZ-NR	pre-VDZ	CD4T	0.0226308	0.062201	2.7485	-1.45865
13	scRNAseq	VDZ-NR	pre-VDZ	CD4T	0.0448718	0.0410959	0.915851	0.126815
14	scRNAseq	VDZ-NR	pre-VDZ	CD4T	0.025	0.0457516	1.83007	-0.871895
15	scRNAseq	VDZ-NR	pre-VDZ	CD4T	0.0222222	0.0844037	3.79817	-1.9253
20	scRNAseq	VDZ-NR	pre-VDZ	CD4T	0.0136986	0.0672269	4.90756	-2.29501
21	scRNAseq	VDZ-NR	pre-VDZ	CD4T	0.0358306	0.0445714	1.24395	-0.314926
24	scRNAseq	VDZ-NR	pre-VDZ	CD4T	0.0237069	0.0610169	2.57381	-1.3639
25	scRNAseq	VDZ-NR	pre-VDZ	CD4T	0.0153846	0.044289	2.87879	-1.52546
3	scRNAseq	VDZ-NR	pre-VDZ	CD4T	0.0660793	0.145397	2.20035	-1.13773
9	scRNAseq	VDZ-NR	pre-VDZ	CD8T	0.0495495	0.057554	1.16154	-0.216043
13	scRNAseq	VDZ-NR	pre-VDZ	CD8T	0.0890411	0.0246479	0.276815	1.85301
14	scRNAseq	VDZ-NR	pre-VDZ	CD8T	0.108434	0.0653775	0.602926	0.729947
15	scRNAseq	VDZ-NR	pre-VDZ	CD8T	0.109756	0.135135	1.23123	-0.300102
20	scRNAseq	VDZ-NR	pre-VDZ	CD8T	0.0233645	0.0513699	2.19863	-1.1366
21	scRNAseq	VDZ-NR	pre-VDZ	CD8T	0.0723684	0.0411765	0.568984	0.81354
24	scRNAseq	VDZ-NR	pre-VDZ	CD8T	0.0471698	0.0693642	1.47052	-0.556327
25	scRNAseq	VDZ-NR	pre-VDZ	CD8T	0.0833333	0.0683453	0.820144	0.286051
3	scRNAseq	VDZ-NR	pre-VDZ	CD8T	0.123288	0.175258	1.42153	-0.50745
13	scRNAseq	VDZ-NR	pre-VDZ	DC	0.153846	0.0806452	0.524194	0.931828
14	scRNAseq	VDZ-NR	pre-VDZ	DC	0.0833333	0.0882353	1.05882	-0.0824622
15	scRNAseq	VDZ-NR	pre-VDZ	DC	0.0625	0.315789	5.05263	-2.33703
20	scRNAseq	VDZ-NR	pre-VDZ	DC	0.0338983	0.216667	6.39167	-2.67619
21	scRNAseq	VDZ-NR	pre-VDZ	DC	0.0722892	0.219512	3.03659	-1.60245
24	scRNAseq	VDZ-NR	pre-VDZ	DC	0.122807	0.214286	1.7449	-0.803143
3	scRNAseq	VDZ-NR	pre-VDZ	DC	0.114286	0.4375	3.82813	-1.93664
9	scRNAseq	VDZ-NR	pre-VDZ	monocyte	0.0740741	0.0196078	0.264706	1.91754
15	scRNAseq	VDZ-NR	pre-VDZ	monocyte	0.004	0.0470793	11.7698	-3.55702
20	scRNAseq	VDZ-NR	pre-VDZ	monocyte	0.00925926	0.0171326	1.85032	-0.887771
21	scRNAseq	VDZ-NR	pre-VDZ	monocyte	0.0882353	0.0119284	0.135189	2.88695
24	scRNAseq	VDZ-NR	pre-VDZ	monocyte	0.0152672	0.0455487	2.98344	-1.57698
3	scRNAseq	VDZ-NR	pre-VDZ	monocyte	0.0165746	0.144685	8.72933	-3.12587
9	scRNAseq	VDZ-NR	pre-VDZ	NK	0.0588235	0.3	5.1	-2.3505
14	scRNAseq	VDZ-NR	pre-VDZ	NK	0.125	0.117647	0.941176	0.0874628
15	scRNAseq	VDZ-NR	pre-VDZ	NK	0.157895	0.0870588	0.551373	0.858901
24	scRNAseq	VDZ-NR	pre-VDZ	NK	0.190476	0.179104	0.940299	0.0888093
3	scRNAseq	VDZ-NR	pre-VDZ	NK	0.0555556	0.22695	4.08511	-2.03037
6	scRNAseq	VDZ-NR	pre-VDZ	plasma	0.191388	0.333333	1.74167	-0.800469
13	scRNAseq	VDZ-NR	pre-VDZ	plasma	0.112922	0.75	6.64175	-2.73156
14	scRNAseq	VDZ-NR	pre-VDZ	plasma	0.144044	0.818182	5.68007	-2.50591
15	scRNAseq	VDZ-NR	pre-VDZ	plasma	0.0678733	0.5	7.36667	-2.88101
20	scRNAseq	VDZ-NR	pre-VDZ	plasma	0.0909091	0.4375	4.8125	-2.26679
21	scRNAseq	VDZ-NR	pre-VDZ	plasma	0.0746269	0.533333	7.14667	-2.83727
24	scRNAseq	VDZ-NR	pre-VDZ	plasma	0.110571	0.625	5.65247	-2.49888
3	scRNAseq	VDZ-NR	pre-VDZ	plasma	0.0669782	0.72	10.7498	-3.42623
3	scRNAseq	VDZ-NR	pre-VDZ	T_other	0.428571	0.210526	0.491228	1.02554
6	scRNAseq	VDZ-NR	post-VDZ	CD4T	0.107143	0.125733	1.17351	-0.230827
6	scRNAseq	VDZ-NR	post-VDZ	CD8T	0.236842	0.156716	0.661692	0.595769
9	scRNAseq	VDZ-NR	post-VDZ	B	0.0441989	0.04	0.905	0.14401
13	scRNAseq	VDZ-NR	post-VDZ	B	0.0588235	0.0467836	0.795322	0.33039
14	scRNAseq	VDZ-NR	post-VDZ	B	0.666667	0.121212	0.181818	2.45943
15	scRNAseq	VDZ-NR	post-VDZ	B	0.0576923	0.0530612	0.919728	0.120721
20	scRNAseq	VDZ-NR	post-VDZ	B	0.0308642	0.0740741	2.4	-1.26303
3	scRNAseq	VDZ-NR	post-VDZ	B	0.0833333	0.0338983	0.40678	1.29768
9	scRNAseq	VDZ-NR	post-VDZ	CD4T	0.0174927	0.0822581	4.70242	-2.2334
13	scRNAseq	VDZ-NR	post-VDZ	CD4T	0.0888889	0.0642148	0.722417	0.469097
15	scRNAseq	VDZ-NR	post-VDZ	CD4T	0.0618557	0.105155	1.7	-0.765535
20	scRNAseq	VDZ-NR	post-VDZ	CD4T	0.0173228	0.0585106	3.37766	-1.75602
21	scRNAseq	VDZ-NR	post-VDZ	CD4T	0.0352941	0.0277778	0.787037	0.345497
25	scRNAseq	VDZ-NR	post-VDZ	CD4T	0.0322581	0.063172	1.95833	-0.969626
3	scRNAseq	VDZ-NR	post-VDZ	CD4T	0.0704225	0.061674	0.875771	0.191375
9	scRNAseq	VDZ-NR	post-VDZ	CD8T	0.0697051	0.0635359	0.911496	0.133692
13	scRNAseq	VDZ-NR	post-VDZ	CD8T	0.190476	0.0645995	0.339147	1.56002
14	scRNAseq	VDZ-NR	post-VDZ	CD8T	0.0930233	0.159946	1.71942	-0.781924
15	scRNAseq	VDZ-NR	post-VDZ	CD8T	0.108571	0.113971	1.04973	-0.0700171
20	scRNAseq	VDZ-NR	post-VDZ	CD8T	0.0383142	0.0687023	1.79313	-0.84248
21	scRNAseq	VDZ-NR	post-VDZ	CD8T	0.027027	0.0263158	0.973684	0.0384741
25	scRNAseq	VDZ-NR	post-VDZ	CD8T	0.0841584	0.0811111	0.963791	0.053208
3	scRNAseq	VDZ-NR	post-VDZ	CD8T	0.0882353	0.0512821	0.581197	0.782902
9	scRNAseq	VDZ-NR	post-VDZ	DC	0.1875	0.5	2.66667	-1.41504
15	scRNAseq	VDZ-NR	post-VDZ	DC	0.181818	0.304348	1.67391	-0.743225
20	scRNAseq	VDZ-NR	post-VDZ	DC	0.0643564	0.285714	4.43956	-2.15042
21	scRNAseq	VDZ-NR	post-VDZ	DC	0.333333	0.5	1.5	-0.584963
9	scRNAseq	VDZ-NR	post-VDZ	ILC	0.25	0.125	0.5	1
9	scRNAseq	VDZ-NR	post-VDZ	monocyte	0.00909091	0.0688259	7.57085	-2.92046
15	scRNAseq	VDZ-NR	post-VDZ	monocyte	0.09375	0.0440636	0.470012	1.08923
20	scRNAseq	VDZ-NR	post-VDZ	monocyte	0.0106383	0.00540541	0.508108	0.976793
3	scRNAseq	VDZ-NR	post-VDZ	monocyte	0.0265252	0.025	0.9425	0.0854355
9	scRNAseq	VDZ-NR	post-VDZ	NK	0.272727	0.109091	0.4	1.32193
15	scRNAseq	VDZ-NR	post-VDZ	NK	0.153846	0.122642	0.79717	0.327041
20	scRNAseq	VDZ-NR	post-VDZ	NK	0.0512821	0.108696	2.11957	-1.08377
3	scRNAseq	VDZ-NR	post-VDZ	NK	0.25	0.0909091	0.363636	1.45943
6	scRNAseq	VDZ-NR	post-VDZ	plasma	0.195021	0.8	4.10213	-2.03637
13	scRNAseq	VDZ-NR	post-VDZ	plasma	0.0492958	0.6	12.1714	-3.60543
14	scRNAseq	VDZ-NR	post-VDZ	plasma	0.0916031	1	10.9167	-3.44846
15	scRNAseq	VDZ-NR	post-VDZ	plasma	0.0539683	0.0909091	1.68449	-0.752314
20	scRNAseq	VDZ-NR	post-VDZ	plasma	0.0620592	0.857143	13.8117	-3.78782
3	scRNAseq	VDZ-NR	post-VDZ	plasma	0.0197889	1	50.5333	-5.65916
9	scRNAseq	VDZ-NR	post-VDZ	T_other	0.166667	0.027027	0.162162	2.62449
15	scRNAseq	VDZ-NR	post-VDZ	T_other	0.666667	0.0769231	0.115385	3.11548
20	scRNAseq	VDZ-NR	post-VDZ	T_other	0.0555556	0.125	2.25	-1.16993
3	scRNAseq	VDZ-NR	post-VDZ	T_other	0.142857	0.0909091	0.636364	0.652077
PBMC/mucosa ratios CYTEK											Statistics for ratio_pbmc/mucosa CYTEK
patient	technique	response	time point	celltype	proportion_mucosa	proportion_pbmc	ratio_pbmc/mucosa	neg_log2_ratio_log			technique	celltype	p-value (Wilcoxon rank test)	comparison; condition
10	Cytek	VDZ-R	pre-VDZ	Monocytes/macrophages	67.6	100	1.47929	-0.564905			Cytek	B cells	0.376759	VDZ-NR vs VDZ-R, pre-VDZ
11	Cytek	VDZ-R	pre-VDZ	Monocytes/macrophages	1.06	99.3	93.6792	-6.54966			Cytek	B cells	0.143672	VDZ-NR vs VDZ-R, post-VDZ
16	Cytek	VDZ-R	pre-VDZ	Monocytes/macrophages	0.344	99.9	290.407	-8.18193			Cytek	B cells	0.0234106	post-VDZ vs pre-VDZ, VDZ-R
16	Cytek	VDZ-R	pre-VDZ	Monocytes/macrophages	7.08	99.9	14.1102	-3.81866			Cytek	B cells	0.0357638	post-VDZ vs pre-VDZ, VDZ-NR
18	Cytek	VDZ-R	pre-VDZ	Monocytes/macrophages	78.7	99.8	1.26811	-0.342676			Cytek	CD4 T cells	0.443657	VDZ-NR vs VDZ-R, pre-VDZ
19	Cytek	VDZ-R	pre-VDZ	Monocytes/macrophages	1.8	99.9	55.5	-5.79442			Cytek	CD4 T cells	0.834532	VDZ-NR vs VDZ-R, post-VDZ
23	Cytek	VDZ-R	pre-VDZ	Monocytes/macrophages	0.282	99.3	352.128	-8.45995			Cytek	CD4 T cells	0.504985	post-VDZ vs pre-VDZ, VDZ-R
10	Cytek	VDZ-R	pre-VDZ	B cells	29.1	27.3	0.938144	0.0921182			Cytek	CD4 T cells	0.120691	post-VDZ vs pre-VDZ, VDZ-NR
11	Cytek	VDZ-R	pre-VDZ	B cells	6.28	2.84	0.452229	1.14487			Cytek	CD4negCD8neg	0.77283	VDZ-NR vs VDZ-R, pre-VDZ
16	Cytek	VDZ-R	pre-VDZ	B cells	8.05	15	1.86335	-0.897902			Cytek	CD4negCD8neg	0.77283	VDZ-NR vs VDZ-R, post-VDZ
16	Cytek	VDZ-R	pre-VDZ	B cells	20.6	15	0.728155	0.457682			Cytek	CD4negCD8neg	0.77283	post-VDZ vs pre-VDZ, VDZ-R
18	Cytek	VDZ-R	pre-VDZ	B cells	10.8	8.49	0.786111	0.347195			Cytek	CD4negCD8neg	0.77283	post-VDZ vs pre-VDZ, VDZ-NR
19	Cytek	VDZ-R	pre-VDZ	B cells	7.08	1.76	0.248588	2.00817			Cytek	CD4posCD8pos	1	VDZ-NR vs VDZ-R, pre-VDZ
22	Cytek	VDZ-R	pre-VDZ	B cells	7.27	5.84	0.803301	0.315987			Cytek	CD8 T cells	0.516868	VDZ-NR vs VDZ-R, pre-VDZ
22	Cytek	VDZ-R	pre-VDZ	B cells	12.4	5.84	0.470968	1.0863			Cytek	CD8 T cells	0.210075	VDZ-NR vs VDZ-R, post-VDZ
23	Cytek	VDZ-R	pre-VDZ	B cells	8.43	35.8	4.24674	-2.08636			Cytek	CD8 T cells	0.109599	post-VDZ vs pre-VDZ, VDZ-R
10	Cytek	VDZ-R	pre-VDZ	gd T cells	7.82	3.14	0.401535	1.3164			Cytek	CD8 T cells	0.315302	post-VDZ vs pre-VDZ, VDZ-NR
11	Cytek	VDZ-R	pre-VDZ	gd T cells	17.4	3.55	0.204023	2.2932			Cytek	CDposCD8pos	1	VDZ-NR vs VDZ-R, post-VDZ
16	Cytek	VDZ-R	pre-VDZ	gd T cells	37.5	3.8	0.101333	3.30282			Cytek	gd T cells	0.14268	VDZ-NR vs VDZ-R, pre-VDZ
16	Cytek	VDZ-R	pre-VDZ	gd T cells	74.2	3.8	0.0512129	4.28735			Cytek	gd T cells	0.595883	VDZ-NR vs VDZ-R, post-VDZ
18	Cytek	VDZ-R	pre-VDZ	gd T cells	19.5	4	0.205128	2.2854			Cytek	gd T cells	0.267257	post-VDZ vs pre-VDZ, VDZ-R
19	Cytek	VDZ-R	pre-VDZ	gd T cells	2.34	1.84	0.786325	0.346803			Cytek	gd T cells	0.470486	post-VDZ vs pre-VDZ, VDZ-NR
22	Cytek	VDZ-R	pre-VDZ	gd T cells	3.8	7.14	1.87895	-0.909925			Cytek	ILCs	1	VDZ-NR vs VDZ-R, pre-VDZ
22	Cytek	VDZ-R	pre-VDZ	gd T cells	60.9	7.14	0.117241	3.09245			Cytek	ILCs	0.723674	post-VDZ vs pre-VDZ, VDZ-NR
23	Cytek	VDZ-R	pre-VDZ	gd T cells	2.26	17	7.52212	-2.91114			Cytek	Monocytes/macrophages	0.494125	VDZ-NR vs VDZ-R, pre-VDZ
10	Cytek	VDZ-R	pre-VDZ	CD4 T cells	9.85	1.38	0.140102	2.83546			Cytek	Monocytes/macrophages	1	VDZ-NR vs VDZ-R, post-VDZ
11	Cytek	VDZ-R	pre-VDZ	CD4 T cells	0.218	1.62	7.43119	-2.89359			Cytek	Monocytes/macrophages	0.515952	post-VDZ vs pre-VDZ, VDZ-R
16	Cytek	VDZ-R	pre-VDZ	CD4 T cells	3.18	3.41	1.07233	-0.100745			Cytek	Monocytes/macrophages	0.77283	post-VDZ vs pre-VDZ, VDZ-NR
16	Cytek	VDZ-R	pre-VDZ	CD4 T cells	12.6	3.41	0.270635	1.88558			Cytek	NK	0.859684	VDZ-NR vs VDZ-R, pre-VDZ
18	Cytek	VDZ-R	pre-VDZ	CD4 T cells	1.71	0.443	0.259064	1.94862			Cytek	NK	0.595883	VDZ-NR vs VDZ-R, post-VDZ
19	Cytek	VDZ-R	pre-VDZ	CD4 T cells	1.38	0.736	0.533333	0.906891			Cytek	NK	0.215925	post-VDZ vs pre-VDZ, VDZ-R
22	Cytek	VDZ-R	pre-VDZ	CD4 T cells	3.23	1.37	0.424149	1.23736			Cytek	NK	0.595883	post-VDZ vs pre-VDZ, VDZ-NR
22	Cytek	VDZ-R	pre-VDZ	CD4 T cells	6.15	1.37	0.222764	2.16641			Cytek	Tregs	0.883617	VDZ-NR vs VDZ-R, pre-VDZ
23	Cytek	VDZ-R	pre-VDZ	CD4 T cells	0.406	2.49	6.133	-2.61659			Cytek	Tregs	0.382733	post-VDZ vs pre-VDZ, VDZ-R
10	Cytek	VDZ-R	pre-VDZ	CD8 T cells	20.5	1.35	0.0658537	3.92459
11	Cytek	VDZ-R	pre-VDZ	CD8 T cells	6.61	4.09	0.618759	0.692549
16	Cytek	VDZ-R	pre-VDZ	CD8 T cells	38.8	10.2	0.262887	1.92749
16	Cytek	VDZ-R	pre-VDZ	CD8 T cells	62.4	10.2	0.163462	2.61298
18	Cytek	VDZ-R	pre-VDZ	CD8 T cells	5.98	1.5	0.250836	1.99518
19	Cytek	VDZ-R	pre-VDZ	CD8 T cells	19	2.16	0.113684	3.1369
22	Cytek	VDZ-R	pre-VDZ	CD8 T cells	28.9	1.44	0.049827	4.32693
22	Cytek	VDZ-R	pre-VDZ	CD8 T cells	42.5	1.44	0.0338824	4.88332
23	Cytek	VDZ-R	pre-VDZ	CD8 T cells	0.962	10.2	10.6029	-3.40639
10	Cytek	VDZ-R	pre-VDZ	Tregs	13.9	2.17	0.156115	2.67932
16	Cytek	VDZ-R	pre-VDZ	Tregs	0.348	0.538	1.54598	-0.628519
16	Cytek	VDZ-R	pre-VDZ	Tregs	2.78	0.538	0.193525	2.36941
18	Cytek	VDZ-R	pre-VDZ	Tregs	17.1	0.855	0.05	4.32193
22	Cytek	VDZ-R	pre-VDZ	Tregs	1.41	0.45	0.319149	1.6477
22	Cytek	VDZ-R	pre-VDZ	Tregs	4.35	0.45	0.103448	3.27302
23	Cytek	VDZ-R	pre-VDZ	Tregs	0.14	3.33	23.7857	-4.57202
18	Cytek	VDZ-R	pre-VDZ	CD4negCD8neg	4.19	5.26	1.25537	-0.328113
22	Cytek	VDZ-R	pre-VDZ	CD4negCD8neg	1.49	2.94	1.97315	-0.980504
11	Cytek	VDZ-R	pre-VDZ	CD4posCD8pos	5.6	2.04	0.364286	1.45686
16	Cytek	VDZ-R	pre-VDZ	CD4posCD8pos	18	4.44	0.246667	2.01937
16	Cytek	VDZ-R	pre-VDZ	CD4posCD8pos	43.5	4.44	0.102069	3.29238
18	Cytek	VDZ-R	pre-VDZ	CD4posCD8pos	8.41	10	1.18906	-0.249822
23	Cytek	VDZ-R	pre-VDZ	CD4posCD8pos	3.17	8.33	2.62776	-1.39383
22	Cytek	VDZ-R	pre-VDZ	ILCs	25	5.56	0.2224	2.16877
10	Cytek	VDZ-R	pre-VDZ	NK	7.81	0.727	0.0930858	3.4253
18	Cytek	VDZ-R	pre-VDZ	NK	14.2	1.55	0.109155	3.19555
22	Cytek	VDZ-R	pre-VDZ	NK	3.35	0.139	0.0414925	4.591
22	Cytek	VDZ-R	pre-VDZ	NK	8.68	0.139	0.0160138	5.96454
16	Cytek	VDZ-R	post-VDZ	Monocytes/macrophages	6.45	99.7	15.4574	-3.95022
17	Cytek	VDZ-R	post-VDZ	Monocytes/macrophages	1.28	99.4	77.6562	-6.27903
17	Cytek	VDZ-R	post-VDZ	Monocytes/macrophages	85.4	99.4	1.16393	-0.21901
23	Cytek	VDZ-R	post-VDZ	Monocytes/macrophages	71.9	99.8	1.38804	-0.473048
12	Cytek	VDZ-R	post-VDZ	Monocytes/macrophages	0.444	99.9	225	-7.81378
17	Cytek	VDZ-R	post-VDZ	CD123+ pDCs	8.33	2.22	0.266507	1.90776
16	Cytek	VDZ-R	post-VDZ	B cells	10.8	2.37	0.219444	2.18807
17	Cytek	VDZ-R	post-VDZ	B cells	11.2	3.07	0.274107	1.86719
17	Cytek	VDZ-R	post-VDZ	B cells	47.8	3.07	0.0642259	3.9607
23	Cytek	VDZ-R	post-VDZ	B cells	42.5	20.5	0.482353	1.05184
12	Cytek	VDZ-R	post-VDZ	B cells	34.6	9.43	0.272543	1.87544
17	Cytek	VDZ-R	post-VDZ	gd T cells	40.5	2.38	0.0587654	4.08889
17	Cytek	VDZ-R	post-VDZ	gd T cells	77.5	2.38	0.0307097	5.02516
23	Cytek	VDZ-R	post-VDZ	gd T cells	25	11.8	0.472	1.08314
16	Cytek	VDZ-R	post-VDZ	CD4 T cells	8.35	2.21	0.264671	1.91773
17	Cytek	VDZ-R	post-VDZ	CD4 T cells	7.17	3.53	0.492329	1.0223
17	Cytek	VDZ-R	post-VDZ	CD4 T cells	5.14	3.53	0.68677	0.5421
23	Cytek	VDZ-R	post-VDZ	CD4 T cells	4.32	0.789	0.182639	2.45293
12	Cytek	VDZ-R	post-VDZ	CD4 T cells	6.56	1.49	0.227134	2.13838
16	Cytek	VDZ-R	post-VDZ	CD8 T cells	40.4	5.46	0.135149	2.88738
17	Cytek	VDZ-R	post-VDZ	CD8 T cells	45.8	1.42	0.0310044	5.01138
17	Cytek	VDZ-R	post-VDZ	CD8 T cells	56.6	1.42	0.0250883	5.31684
23	Cytek	VDZ-R	post-VDZ	CD8 T cells	20.8	5.46	0.2625	1.92961
12	Cytek	VDZ-R	post-VDZ	CD8 T cells	19.5	0.211	0.0108205	6.53009
16	Cytek	VDZ-R	post-VDZ	Tregs	5.71	0.546	0.0956217	3.38652
17	Cytek	VDZ-R	post-VDZ	CD4negCD8neg	4.08	4.88	1.19608	-0.258312
17	Cytek	VDZ-R	post-VDZ	CD4negCD8neg	9.66	4.88	0.505176	0.985142
23	Cytek	VDZ-R	post-VDZ	CD4negCD8neg	2.5	9.09	3.636	-1.86235
23	Cytek	VDZ-R	post-VDZ	CDposCD8pos	25	2.27	0.0908	3.46116
16	Cytek	VDZ-R	post-VDZ	NK	15.1	0.602	0.0398676	4.64864
17	Cytek	VDZ-R	post-VDZ	NK	7.83	0.318	0.040613	4.62191
17	Cytek	VDZ-R	post-VDZ	NK	68.8	0.318	0.00462209	7.75724
14	Cytek	VDZ-NR	pre-VDZ	Monocytes/macrophages	19.2	99.7	5.19271	-2.37649
15	Cytek	VDZ-NR	pre-VDZ	Monocytes/macrophages	0.474	99.1	209.072	-7.70785
21	Cytek	VDZ-NR	pre-VDZ	Monocytes/macrophages	80.7	100	1.23916	-0.309359
21	Cytek	VDZ-NR	pre-VDZ	CD123+ pDCs	9.15	2.7	0.295082	1.76081
13	Cytek	VDZ-NR	pre-VDZ	B cells	11.2	6.98	0.623214	0.6822
14	Cytek	VDZ-NR	pre-VDZ	B cells	39.3	10.8	0.274809	1.8635
15	Cytek	VDZ-NR	pre-VDZ	B cells	7.6	2.59	0.340789	1.55305
20	Cytek	VDZ-NR	pre-VDZ	B cells	40.8	9.54	0.233824	2.09651
21	Cytek	VDZ-NR	pre-VDZ	B cells	7.31	8.88	1.21477	-0.280688
21	Cytek	VDZ-NR	pre-VDZ	B cells	8.01	8.88	1.10861	-0.148757
13	Cytek	VDZ-NR	pre-VDZ	gd T cells	33.2	3.43	0.103313	3.2749
14	Cytek	VDZ-NR	pre-VDZ	gd T cells	39.1	0.738	0.0188747	5.7274
15	Cytek	VDZ-NR	pre-VDZ	gd T cells	5.23	0.439	0.0839388	3.57452
20	Cytek	VDZ-NR	pre-VDZ	gd T cells	20.1	5.43	0.270149	1.88817
13	Cytek	VDZ-NR	pre-VDZ	CD4 T cells	5.94	1.7	0.286195	1.80493
14	Cytek	VDZ-NR	pre-VDZ	CD4 T cells	1.59	2.17	1.36478	-0.448668
15	Cytek	VDZ-NR	pre-VDZ	CD4 T cells	0.715	1.37	1.91608	-0.938161
20	Cytek	VDZ-NR	pre-VDZ	CD4 T cells	8.71	5.2	0.597015	0.744161
21	Cytek	VDZ-NR	pre-VDZ	CD4 T cells	2.72	1.38	0.507353	0.978938
21	Cytek	VDZ-NR	pre-VDZ	CD4 T cells	2.83	1.38	0.487633	1.03613
13	Cytek	VDZ-NR	pre-VDZ	CD8 T cells	43.5	2.91	0.0668966	3.90192
14	Cytek	VDZ-NR	pre-VDZ	CD8 T cells	21.2	2.28	0.107547	3.21696
15	Cytek	VDZ-NR	pre-VDZ	CD8 T cells	7.72	1.55	0.200777	2.31633
20	Cytek	VDZ-NR	pre-VDZ	CD8 T cells	36.9	12.3	0.333333	1.58496
21	Cytek	VDZ-NR	pre-VDZ	CD8 T cells	6.9	13.3	1.92754	-0.946758
21	Cytek	VDZ-NR	pre-VDZ	CD8 T cells	28.2	13.3	0.471631	1.08427
15	Cytek	VDZ-NR	pre-VDZ	Tregs	0.15	1.1	7.33333	-2.87447
21	Cytek	VDZ-NR	pre-VDZ	Tregs	18.2	0.68	0.0373626	4.74226
13	Cytek	VDZ-NR	pre-VDZ	CD4negCD8neg	13	5.36	0.412308	1.27821
15	Cytek	VDZ-NR	pre-VDZ	CD4negCD8neg	4.44	3.77	0.849099	0.235995
20	Cytek	VDZ-NR	pre-VDZ	CD4negCD8neg	0.752	2.17	2.88564	-1.52889
14	Cytek	VDZ-NR	pre-VDZ	CD4posCD8pos	14.6	5.26	0.360274	1.47283
15	Cytek	VDZ-NR	pre-VDZ	CD4posCD8pos	8.36	0.952	0.113876	3.13447
20	Cytek	VDZ-NR	pre-VDZ	CD4posCD8pos	14	21.5	1.53571	-0.61891
21	Cytek	VDZ-NR	pre-VDZ	CD4posCD8pos	9.37	6.67	0.711846	0.490362
21	Cytek	VDZ-NR	pre-VDZ	CD4posCD8pos	25	6.67	0.2668	1.90617
15	Cytek	VDZ-NR	pre-VDZ	ILCs	5.37	5.04	0.938547	0.0914984
13	Cytek	VDZ-NR	pre-VDZ	NK	32.6	0.369	0.011319	6.46511
15	Cytek	VDZ-NR	pre-VDZ	NK	15	0.254	0.0169333	5.88399
20	Cytek	VDZ-NR	pre-VDZ	NK	1.99	0.554	0.278392	1.84481
25	Cytek	VDZ-NR	post-VDZ	Monocytes/macrophages	0.461	99.8	216.486	-7.75813
21	Cytek	VDZ-NR	post-VDZ	Monocytes/macrophages	80.4	100	1.24378	-0.314733
20	Cytek	VDZ-NR	post-VDZ	B cells	19.3	8.22	0.425907	1.23139
15	Cytek	VDZ-NR	post-VDZ	B cells	7.6	0.887	0.116711	3.09899
25	Cytek	VDZ-NR	post-VDZ	B cells	28.1	0.87	0.0309609	5.01341
25	Cytek	VDZ-NR	post-VDZ	B cells	33.7	0.87	0.025816	5.27559
21	Cytek	VDZ-NR	post-VDZ	B cells	70.6	0.44	0.00623229	7.32602
20	Cytek	VDZ-NR	post-VDZ	gd T cells	21.6	0.694	0.0321296	4.95995
15	Cytek	VDZ-NR	post-VDZ	gd T cells	1.56	1.26	0.807692	0.308122
25	Cytek	VDZ-NR	post-VDZ	gd T cells	81.7	0.23	0.00281518	8.47256
25	Cytek	VDZ-NR	post-VDZ	gd T cells	83	0.23	0.00277108	8.49533
20	Cytek	VDZ-NR	post-VDZ	CD4 T cells	10.9	3.11	0.285321	1.80934
15	Cytek	VDZ-NR	post-VDZ	CD4 T cells	0.46	1.93	4.19565	-2.0689
25	Cytek	VDZ-NR	post-VDZ	CD4 T cells	3.83	1.01	0.263708	1.92299
25	Cytek	VDZ-NR	post-VDZ	CD4 T cells	4.88	1.01	0.206967	2.27253
21	Cytek	VDZ-NR	post-VDZ	CD4 T cells	8.33	0.404	0.0484994	4.36589
20	Cytek	VDZ-NR	post-VDZ	CD8 T cells	43.6	11.9	0.272936	1.87337
15	Cytek	VDZ-NR	post-VDZ	CD8 T cells	2.92	4.86	1.66438	-0.734988
25	Cytek	VDZ-NR	post-VDZ	CD8 T cells	42.6	1.88	0.0441315	4.50205
25	Cytek	VDZ-NR	post-VDZ	CD8 T cells	55.9	1.88	0.0336315	4.89404
21	Cytek	VDZ-NR	post-VDZ	CD8 T cells	55.1	4.82	0.0874773	3.51495
15	Cytek	VDZ-NR	post-VDZ	CD4negCD8neg	7.69	2	0.260078	1.94298
25	Cytek	VDZ-NR	post-VDZ	CD4negCD8neg	1.24	2.44	1.96774	-0.976541
20	Cytek	VDZ-NR	post-VDZ	CDposCD8pos	20.5	6.4	0.312195	1.67948
20	Cytek	VDZ-NR	post-VDZ	ILCs	0.176	4.17	23.6932	-4.5664
25	Cytek	VDZ-NR	post-VDZ	ILCs	50	1.56	0.0312	5.00231
25	Cytek	VDZ-NR	post-VDZ	ILCs	80	1.56	0.0195	5.68038
21	Cytek	VDZ-NR	post-VDZ	ILCs	8.82	1	0.113379	3.14078
20	Cytek	VDZ-NR	post-VDZ	NK	5.36	0.407	0.0759328	3.71913
15	Cytek	VDZ-NR	post-VDZ	NK	2.78	0.459	0.165108	2.59852
25	Cytek	VDZ-NR	post-VDZ	NK	2.23	0.0827	0.0370852	4.75301
25	Cytek	VDZ-NR	post-VDZ	NK	4.78	0.0827	0.0173013	5.85298

## Sheet: Supplementary Table 7
Supplementary Table 7
Cell counts of mucosal and circulating cells in UC patients 2 weeks prior to and after 14 weeks of vedolizumab treatment
This table provides additional detailed data pertaining to Figure 3, Extended Data Figure 6 and Extended Data Figure 7
VDZ, vedolizumab; pre-VDZ, study time point of 2 weeks prior to start of vedolizumab treatment; post-VDZ, study time point of 14 weeks after the start of vedolizumab treatment; PGA, Physician global assessment
MUCOSA scRNAseq
sample	tissue	technique	timepoint	location	inflammation	response by PGA	TNF_status	Best4+ Enterocytes	CD4+ Activated Fos-hi	CD4+ Activated Fos-lo	CD4+ Memory	CD4+ PD1+	CD69- Mast	CD69+ Mast	CD8+ IELs	CD8+ IL17+	CD8+ LP	Cycling B	Cycling T	Cycling TA	DC1	DC2	Endothelial	Enterocyte Progenitors	Enterocytes	Enteroendocrine	Follicular	GC	Glia	Goblet	Ig_negative	IgA	IgG	IgM	ILCs	Immature Enterocytes 1	Immature Enterocytes 2	Immature Goblet	Inflammatory Fibroblasts	Inflammatory Monocytes	M cells	Macrophages	Microvascular	Myofibroblasts	NKs	Paneth_like_cells	pDc	Pericytes	Activated Endothelial Cells
1	mucosa	scRNAseq	pre-VDZ	ascendens	I	yes	naive	0	19	15	0	1	4	6	3	34	22	6	1	29	1	12	39	3	98	2	281	101	0	1	4	87	301	6	1	2	49	15	37	13	1	5	16	3	9	0	0	38	19
2	mucosa	scRNAseq	pre-VDZ	transversum	NI	yes	naive	31	9	0	1	0	0	0	2	6	5	2	0	267	1	1	58	67	68	50	0	0	5	6	9	82	10	5	0	22	238	20	0	0	5	0	17	18	0	0	0	13	34
3	mucosa	scRNAseq	post-VDZ	sigmoid	NI	yes	naive	61	54	1	1	0	0	3	10	14	26	2	0	256	0	5	32	59	266	20	11	1	5	21	9	287	48	4	0	22	181	43	0	3	3	1	31	2	1	1	0	15	14
4	mucosa	scRNAseq	pre-VDZ	ascendens	NI	yes	naive	7	34	0	0	0	1	1	6	14	26	0	0	101	0	7	1	13	78	9	1	0	0	0	12	210	29	8	1	45	31	10	0	0	0	0	0	0	0	0	0	3	2
5	mucosa	scRNAseq	pre-VDZ	rectum	I	yes	naive	2	140	9	0	0	62	79	9	85	151	47	5	142	1	21	131	24	123	18	152	257	26	12	16	207	708	7	0	6	58	12	52	7	6	15	37	20	13	5	6	35	44
6	mucosa	scRNAseq	post-VDZ	sigmoid	I	yes	naive	7	176	8	1	0	18	39	17	91	202	39	2	90	0	19	195	16	86	32	128	115	16	12	2	298	597	15	2	5	75	41	9	7	1	3	35	16	22	0	9	58	63
7	mucosa	scRNAseq	pre-VDZ	rectum	I	yes	naive	0	478	15	0	0	13	23	3	126	146	1	6	9	0	38	256	13	32	2	173	66	64	16	46	729	361	24	0	0	5	12	168	272	0	16	37	26	15	2	1	155	409
8	mucosa	scRNAseq	pre-VDZ	sigmoid	NI	yes	naive	52	86	2	0	0	0	7	5	7	16	0	0	110	1	1	14	15	140	22	22	7	29	4	5	202	8	4	4	18	121	9	0	2	0	5	18	30	1	0	0	8	11
9	mucosa	scRNAseq	post-VDZ	rectum	NI	yes	naive	52	147	0	0	0	0	5	17	62	73	0	1	101	0	17	238	10	51	22	11	0	117	30	9	704	119	13	12	17	26	97	5	4	0	1	60	92	11	0	2	76	107
10	mucosa	scRNAseq	post-VDZ	sigmoid	NI	yes	naive	112	59	0	0	0	1	3	17	13	45	1	0	183	1	6	7	36	93	24	7	0	8	4	11	348	16	9	1	10	129	26	0	0	0	0	4	0	0	0	0	2	2
11	mucosa	scRNAseq	pre-VDZ	sigmoid	I	yes	exposed	14	305	29	0	1	0	1	28	126	76	4	6	108	2	40	52	5	196	21	120	76	13	5	19	864	85	41	3	5	65	60	20	15	5	6	28	17	16	23	4	36	51
12	mucosa	scRNAseq	pre-VDZ	transversum	NI	yes	exposed	23	67	7	1	0	0	0	10	21	18	13	0	71	0	14	0	5	63	9	50	47	5	0	4	583	15	7	2	8	19	2	0	0	2	0	1	0	3	0	0	2	0
13	mucosa	scRNAseq	post-VDZ	rectum	NI	yes	exposed	96	50	3	1	1	0	1	1	6	24	2	0	280	1	10	39	19	32	18	16	2	3	6	39	347	24	13	0	4	95	29	0	1	1	1	11	20	3	1	1	23	13
14	mucosa	scRNAseq	post-VDZ	sigmoid	NI	yes	exposed	37	25	1	0	0	0	0	2	6	10	0	0	184	0	4	5	7	118	4	2	0	3	2	11	113	8	1	1	7	104	12	0	0	0	0	8	6	1	2	0	4	3
15	mucosa	scRNAseq	pre-VDZ	sigmoid	NI	no	exposed	56	15	0	0	0	0	0	4	2	1	0	0	112	0	3	2	29	202	7	0	0	0	1	42	150	13	4	1	12	89	5	0	1	0	0	2	0	1	1	0	2	3
16	mucosa	scRNAseq	post-VDZ	sigmoid	NI	no	exposed	92	28	0	0	0	0	0	11	8	19	0	0	114	0	2	11	37	286	24	1	0	3	5	18	211	6	6	4	19	169	23	0	1	0	0	5	6	0	1	1	2	3
17	mucosa	scRNAseq	pre-VDZ	sigmoid	NI	yes	exposed	41	127	1	1	0	0	4	3	49	97	1	0	209	0	14	159	11	104	10	23	1	34	17	5	303	40	36	4	6	54	51	1	2	0	1	32	51	5	1	3	25	43
18	mucosa	scRNAseq	post-VDZ	sigmoid	NI	yes	exposed	29	59	3	3	1	1	0	0	18	65	0	1	145	0	5	49	10	152	13	20	3	18	8	2	162	11	11	0	9	120	16	1	2	1	1	27	4	2	0	0	17	26
19	mucosa	scRNAseq	pre-VDZ	sigmoid	I	yes	exposed	16	79	9	1	1	2	5	0	38	57	5	2	148	0	9	51	41	453	25	82	46	11	57	63	417	697	61	0	2	136	67	77	16	0	11	4	3	5	17	0	32	46
20	mucosa	scRNAseq	post-VDZ	rectum	I	yes	exposed	36	169	5	0	0	5	7	13	111	60	97	12	148	1	9	139	19	215	19	237	233	15	18	10	243	139	17	4	6	119	76	25	8	15	6	51	35	10	0	7	49	83
21	mucosa	scRNAseq	post-VDZ	sigmoid	NI	yes	exposed	178	77	0	0	0	1	0	4	23	24	2	0	170	1	1	36	30	333	32	20	1	11	14	24	137	26	8	2	31	585	46	1	0	6	0	16	36	1	0	0	16	13
22	mucosa	scRNAseq	pre-VDZ	sigmoid	I	no	exposed	5	390	102	3	1	2	4	4	68	127	6	9	14	0	7	157	14	39	1	300	8	12	2	25	121	695	24	2	0	12	3	83	22	0	3	18	8	17	1	0	30	78
23	mucosa	scRNAseq	pre-VDZ	sigmoid	NI	no	exposed	80	44	15	0	0	1	0	3	8	12	0	0	101	0	0	17	3	130	1	6	1	1	7	1	25	6	2	1	6	118	3	0	2	1	0	0	1	0	0	0	2	2
24	mucosa	scRNAseq	post-VDZ	rectum	I	no	exposed	2	114	16	2	2	2	2	4	72	74	24	6	11	1	5	30	3	15	1	336	99	26	18	84	122	1283	23	1	0	20	7	124	77	0	8	7	4	5	0	5	32	85
25	mucosa	scRNAseq	post-VDZ	sigmoid	NI	no	exposed	179	172	2	0	0	0	5	29	96	98	0	0	189	0	5	109	10	268	18	2	0	53	28	4	116	68	38	3	16	331	28	0	24	0	1	53	50	6	2	0	32	23
26	mucosa	scRNAseq	pre-VDZ	rectum	I	yes	naive	10	230	22	2	0	0	0	9	139	100	16	6	47	2	14	42	12	147	11	471	26	2	11	118	551	852	40	2	1	43	35	17	32	1	9	7	17	20	5	0	17	31
27	mucosa	scRNAseq	pre-VDZ	sigmoid	I	yes	naive	7	84	7	0	0	0	0	5	63	28	6	6	44	0	6	36	4	102	10	60	5	2	5	14	138	68	17	2	0	6	42	18	14	0	7	17	12	6	6	1	17	19
28	mucosa	scRNAseq	post-VDZ	sigmoid	NI	yes	naive	63	85	4	0	0	0	0	3	26	18	3	3	451	0	1	4	91	153	16	23	2	2	6	12	204	57	24	2	8	329	102	0	45	4	4	3	0	2	1	0	0	2
29	mucosa	scRNAseq	pre-VDZ	ascendens	NI	yes	exposed	47	50	2	0	0	0	0	7	11	20	0	0	145	0	4	1	29	197	14	3	0	1	1	3	68	2	12	1	114	328	4	0	7	3	0	0	0	4	0	0	0	0
30	mucosa	scRNAseq	pre-VDZ	rectum	I	yes	exposed	7	22	1	1	1	0	2	1	9	25	6	2	35	0	4	29	12	80	4	61	8	1	10	5	26	46	6	0	2	70	22	4	6	0	1	4	4	4	0	0	13	13
31	mucosa	scRNAseq	post-VDZ	sigmoid	NI	yes	exposed	26	86	1	0	0	0	0	5	10	28	0	0	101	0	3	5	6	103	7	6	0	10	8	3	39	14	10	0	8	153	18	1	4	0	1	5	4	1	0	0	3	1
32	mucosa	scRNAseq	pre-VDZ	ascendens	I	yes	exposed	8	29	8	1	0	0	15	0	8	7	1	1	31	0	8	70	21	176	4	4	1	1	10	10	98	193	12	1	13	62	18	8	41	0	2	27	9	10	10	1	32	33
33	mucosa	scRNAseq	pre-VDZ	descendens	I	yes	exposed	141	27	4	0	0	3	8	13	15	14	0	3	114	0	29	115	22	622	19	1	0	3	14	2	157	36	36	0	4	220	44	21	47	0	14	64	9	10	13	0	33	62
34	mucosa	scRNAseq	post-VDZ	sigmoid	NI	yes	exposed	40	16	2	0	0	1	2	1	6	4	0	0	69	0	3	9	9	76	7	4	2	2	5	0	99	29	5	0	2	30	62	0	5	0	0	12	1	1	1	0	7	7
35	mucosa	scRNAseq	post-VDZ	transversum	NI	yes	exposed	100	13	1	0	0	4	2	2	3	7	4	0	47	0	2	0	29	501	12	2	2	0	14	1	29	36	2	0	29	204	27	1	18	0	2	2	3	3	1	0	2	2
36	mucosa	scRNAseq	pre-VDZ	descendens	I	no	exposed	43	36	1	0	0	0	0	11	14	26	0	0	197	0	13	0	45	114	19	4	2	0	17	2	352	15	7	3	30	158	35	0	30	1	0	1	0	2	3	0	2	2
37	mucosa	scRNAseq	pre-VDZ	sigmoid	I	no	exposed	8	89	3	1	0	0	0	20	41	34	0	1	52	0	13	3	44	76	14	18	6	0	11	5	390	67	21	1	3	80	25	1	9	0	1	8	3	4	74	0	4	3
38	mucosa	scRNAseq	post-VDZ	sigmoid	NI	no	exposed	35	26	3	0	0	0	3	2	16	3	0	0	62	1	7	19	141	32	10	17	3	3	16	5	108	22	7	2	51	147	16	1	6	0	2	4	4	0	3	0	7	8
39	mucosa	scRNAseq	pre-VDZ	sigmoid	I	no	exposed	144	37	0	0	1	0	0	8	7	28	0	0	87	0	7	21	74	282	46	1	0	2	2	1	94	90	5	2	11	302	22	0	1	1	1	1	6	2	2	0	6	16
40	mucosa	scRNAseq	pre-VDZ	sigmoid	NI	no	exposed	40	20	2	0	0	0	0	11	14	15	0	1	33	0	5	4	17	74	10	4	0	1	2	2	91	75	3	0	1	59	18	0	4	0	4	11	0	6	1	0	5	5
41	mucosa	scRNAseq	post-VDZ	sigmoid	NI	no	exposed	44	17	0	0	0	0	0	3	14	26	3	0	52	0	3	14	18	143	13	0	2	4	21	1	169	87	5	4	6	48	60	1	2	0	4	10	6	7	2	0	3	8
42	mucosa	scRNAseq	pre-VDZ	sigmoid	I	no	exposed	5	43	5	0	0	0	0	2	28	52	0	0	33	1	14	15	2	62	3	24	5	1	4	6	115	97	3	2	2	42	19	12	240	0	10	6	2	19	2	1	6	13
43	mucosa	scRNAseq	post-VDZ	sigmoid	I	no	exposed	9	136	2	0	0	0	0	13	42	120	0	3	76	2	8	118	2	121	5	52	2	9	7	4	294	317	15	2	7	60	37	10	23	2	9	49	12	26	8	1	30	69
44	mucosa	scRNAseq	pre-VDZ	descendens	NI	yes	naive	23	70	2	0	0	0	0	9	14	23	0	0	42	1	3	3	3	49	4	5	0	2	0	4	290	31	11	0	18	46	4	0	1	0	0	1	0	5	0	0	4	1
45	mucosa	scRNAseq	pre-VDZ	sigmoid	I	yes	naive	28	170	21	8	2	0	1	10	22	28	1	1	22	0	9	2	13	44	2	77	5	0	2	5	125	41	5	0	6	62	3	0	1	1	0	1	1	4	0	0	3	4
46	mucosa	scRNAseq	post-VDZ	rectum	NI	yes	naive	40	66	5	0	0	0	1	3	4	11	1	0	62	0	0	2	29	12	6	38	1	5	3	3	213	27	6	1	13	122	8	0	0	3	1	5	8	8	0	0	2	6
47	mucosa	scRNAseq	post-VDZ	sigmoid	NI	yes	naive	114	128	5	1	0	0	1	12	8	45	1	0	93	0	4	14	62	20	13	15	0	6	5	14	636	59	9	1	28	181	17	0	0	0	1	10	6	6	0	0	5	4
48	mucosa	scRNAseq	pre-VDZ	sigmoid	I	yes	exposed	43	51	4	0	0	0	0	38	22	67	0	0	90	0	0	7	25	46	17	26	2	4	1	1	58	5	14	1	606	930	12	0	3	2	1	0	1	6	11	0	0	1
49	mucosa	scRNAseq	pre-VDZ	sigmoid	NI	yes	exposed	261	208	4	0	1	0	0	25	24	194	0	0	123	0	3	30	11	150	3	87	2	17	3	15	283	51	51	6	18	252	9	1	3	0	1	16	22	12	0	1	13	11
50	mucosa	scRNAseq	post-VDZ	sigmoid	I	yes	exposed	71	64	11	2	0	0	0	10	28	39	5	1	187	0	3	20	39	137	2	69	18	1	13	10	131	285	5	0	25	155	48	3	3	5	1	8	9	4	2	0	15	10
51	mucosa	scRNAseq	post-VDZ	sigmoid	NI	yes	exposed	82	142	5	0	0	0	0	27	12	71	4	0	224	0	6	35	75	232	11	39	1	7	8	6	247	33	39	2	74	358	19	0	1	0	4	19	21	7	0	0	12	9
52	mucosa	scRNAseq	pre-VDZ	sigmoid	I	yes	naive	16	393	77	3	0	1	2	14	93	92	4	8	104	0	13	35	25	277	3	86	14	7	5	12	66	121	5	0	6	117	63	58	22	3	3	27	9	8	0	5	23	11
53	mucosa	scRNAseq	post-VDZ	sigmoid	NI	yes	naive	152	58	0	1	0	0	0	1	3	16	0	1	130	0	0	15	49	85	8	2	0	4	8	2	131	18	12	0	9	234	29	0	1	3	1	4	1	2	0	0	4	6
54	mucosa	scRNAseq	pre-VDZ	rectum	I	yes	exposed	6	60	7	3	2	2	1	2	22	29	2	0	66	0	6	8	5	67	13	68	9	1	7	8	45	118	5	0	2	59	28	4	24	1	2	1	3	3	1	1	2	3
55	mucosa	scRNAseq	pre-VDZ	sigmoid	I	yes	exposed	26	177	11	0	1	1	2	23	108	94	5	5	57	0	19	51	7	76	17	167	19	4	4	10	287	352	51	0	5	64	62	19	34	0	18	13	12	12	21	3	22	18
56	mucosa	scRNAseq	post-VDZ	sigmoid	NI	yes	exposed	150	244	10	6	1	0	3	12	23	69	6	1	273	0	12	33	56	248	34	143	18	2	55	9	162	75	10	2	37	444	211	2	10	17	5	11	8	10	0	1	7	13
57	mucosa	scRNAseq	pre-VDZ	sigmoid	I	no	exposed	1	185	65	1	1	0	3	13	76	89	40	4	12	8	85	60	3	21	1	498	176	1	4	32	40	394	15	1	4	6	6	43	106	0	2	4	7	25	0	9	14	62
58	mucosa	scRNAseq	pre-VDZ	sigmoid	NI	no	exposed	104	77	5	1	0	0	1	11	8	17	2	1	64	1	15	3	25	221	10	19	0	0	2	6	200	18	43	7	16	137	10	0	0	0	0	1	2	3	0	0	0	0
59	mucosa	scRNAseq	post-VDZ	rectum	I	no	exposed	0	173	15	5	5	0	2	7	98	83	50	16	2	21	161	89	1	3	0	396	83	19	2	94	53	816	49	3	0	4	0	372	709	0	41	3	12	31	1	13	95	163
60	mucosa	scRNAseq	post-VDZ	sigmoid	NI	no	exposed	170	118	4	2	0	0	0	23	28	22	1	2	147	0	6	3	79	610	13	39	1	3	13	2	292	61	51	6	5	399	29	1	2	5	0	5	6	8	1	1	0	3
61	mucosa	scRNAseq	pre-VDZ	rectum	I	no	exposed	0	345	21	1	1	2	0	14	165	94	10	8	49	11	51	22	9	44	7	511	86	3	14	19	284	161	40	1	1	12	56	28	23	1	9	7	37	26	6	8	32	18
62	mucosa	scRNAseq	pre-VDZ	sigmoid	NI	no	exposed	131	105	7	0	1	0	0	1	9	21	1	0	145	0	13	17	22	100	17	82	8	7	6	21	175	19	18	1	11	165	23	0	1	7	1	18	6	2	0	0	8	13
63	mucosa	scRNAseq	post-VDZ	sigmoid	NI	no	exposed	167	82	1	1	0	0	1	9	11	17	0	0	277	1	2	40	16	98	15	3	0	26	11	12	439	14	35	2	30	266	23	0	0	6	0	28	15	2	20	0	9	39
64	mucosa	scRNAseq	pre-VDZ	rectum	NI	yes	naive	17	232	18	0	0	2	0	19	30	63	0	1	407	1	16	7	3	38	29	55	6	5	2	9	97	36	16	6	2	92	61	1	20	2	2	10	4	11	0	1	3	5
65	mucosa	scRNAseq	pre-VDZ	sigmoid	NI	yes	naive	18	110	5	2	0	1	0	6	4	27	0	0	103	1	2	3	10	40	21	11	0	3	2	3	94	19	8	0	20	224	31	0	1	2	0	3	4	5	0	0	2	1
66	mucosa	scRNAseq	post-VDZ	rectum	I	yes	naive	5	313	42	0	1	1	1	6	89	95	31	5	136	1	13	26	4	62	14	356	81	1	9	9	79	134	6	5	2	73	46	0	7	2	4	7	5	10	0	2	16	12
67	mucosa	scRNAseq	post-VDZ	sigmoid	NI	yes	naive	55	194	5	1	0	0	2	22	15	46	1	0	108	0	2	14	7	47	18	24	0	9	2	11	220	188	14	8	2	86	38	0	0	2	0	8	25	5	1	0	2	3
68	mucosa	scRNAseq	pre-VDZ	ascendens	I	yes	naive	2	191	86	7	4	0	1	3	39	54	27	10	19	0	9	1	1	77	0	201	35	0	0	3	83	36	26	0	2	25	5	0	5	1	1	0	0	4	0	0	0	0
69	mucosa	scRNAseq	pre-VDZ	sigmoid	I	yes	naive	17	54	2	1	0	0	1	5	46	34	5	3	181	0	0	13	6	250	16	25	12	2	67	16	198	171	36	1	33	163	117	2	25	2	0	5	2	1	18	4	5	19
70	mucosa	scRNAseq	post-VDZ	sigmoid	NI	yes	naive	73	42	3	1	0	0	0	0	17	20	16	0	161	0	6	30	19	193	7	27	32	9	11	9	139	217	20	0	16	111	63	1	3	1	4	2	7	2	6	0	9	39
71	mucosa	scRNAseq	pre-VDZ	sigmoid	I	no	naive	0	262	53	2	2	11	17	11	91	110	6	3	83	4	51	81	27	76	4	309	65	7	48	42	326	454	1	4	4	22	67	48	110	0	21	28	24	21	0	2	55	51
72	mucosa	scRNAseq	post-VDZ	descendens	NI	no	naive	5	225	61	12	3	2	11	2	29	46	14	1	6	0	5	66	35	100	0	99	60	3	13	25	212	553	0	2	33	46	6	12	6	0	3	18	17	15	1	0	32	29
73	mucosa	scRNAseq	post-VDZ	sigmoid	NI	no	naive	6	49	0	2	0	5	7	15	53	35	13	0	21	0	16	32	6	121	16	18	25	3	6	20	392	288	7	0	80	54	17	10	12	0	5	10	3	23	1	0	17	10
74	mucosa	scRNAseq	pre-VDZ	sigmoid	NI	no	exposed	99	62	2	0	0	0	1	25	8	27	0	0	38	0	2	0	39	289	9	4	0	0	0	1	186	22	6	2	43	295	5	0	0	2	0	1	1	1	0	0	0	0
75	mucosa	scRNAseq	post-VDZ	sigmoid	I	no	exposed	79	57	6	0	1	1	0	18	11	25	0	0	67	0	1	8	46	143	11	3	0	1	2	8	63	37	3	3	3	196	30	1	1	1	0	2	2	10	4	0	4	2
76	mucosa	scRNAseq	post-VDZ	sigmoid	NI	no	exposed	156	76	1	1	0	0	0	53	37	58	0	0	98	0	1	6	82	196	16	4	0	4	6	6	136	15	8	4	19	200	19	0	0	1	1	1	0	6	0	0	2	2
77	mucosa	scRNAseq	pre-VDZ	sigmoid	I	no	exposed	6	156	7	0	0	2	10	8	79	59	2	7	48	4	21	281	20	28	6	82	20	22	28	12	519	107	4	2	2	17	43	57	177	0	4	34	16	18	1	10	227	403
78	mucosa	scRNAseq	post-VDZ	sigmoid	I	no	exposed	1	65	5	0	0	1	6	3	41	24	2	7	6	4	46	105	0	6	0	34	1	3	2	38	203	498	19	0	1	0	0	31	370	0	7	17	2	8	0	9	137	286
MUCOSA spectral flow cytometry (cytek)
sample	tissue	technique	timepoint	location	Inflammation	response by PGA	TNF_status	Macrophages (CD14hi)	CD123+ pDCS	CD103+ CD11c+ DCs	DC like cells	CD38- naive B cells	CD38- IgD+ non-switched B cells	CD38- IgD- memory B cells	CD38+ Transitional B cells	CD38+ Plasmablasts	gd T cells	CD4+CD56+ T cells	CD4 Naïve	Memory CD4+ (CD25-) T cells	Effector memory CD4+ T cells	Tregs	CD4+CD8+ T cells	Naive CD8+ T cells	Memory CD8+ T cells	Effector CD8+ T cells	CD45RA+ CD8+ T cells	ILCs	NK cells	CD4-CD8- T cells
1	mucosa	Cytek	pre-VDZ	rectum	I	yes	naive	1278	8	1	202	3053	541	2252	4642	1484	639	87	911	10380	12314	729	1631	884	1113	4978	254	18	384	791
2	mucosa	Cytek	post-VDZ	sigmoid	NI	yes	naive	63	3	4	31	46	25	630	59	87	99	8	97	2199	780	32	144	8	115	711	30	91	44	5
3	mucosa	Cytek	pre-VDZ	rectum	I	yes	exposed	189	2	7	105	420	322	3756	549	318	109	20	310	4513	2085	426	232	145	701	1818	126	53	61	73
4	mucosa	Cytek	post-VDZ	sigmoid	NI	yes	exposed	225	4	4	69	41	7	258	233	130	119	42	83	2143	436	125	104	11	105	396	43	49	93	19
5	mucosa	Cytek	pre-VDZ	descendens	I	no	exposed	29	0	14	73	43	9	53	116	261	202	1	108	560	218	6	67	23	77	489	83	37	46	23
6	mucosa	Cytek	pre-VDZ	sigmoid	I	no	exposed	26	1	9	81	3	9	66	423	87	207	11	33	1971	706	65	41	13	213	803	149	115	55	33
7	mucosa	Cytek	pre-VDZ	sigmoid	I	no	exposed	2319	95	3	542	807	273	2797	967	318	880	23	121	9527	6470	1997	921	325	2985	5951	1260	242	1876	608
8	mucosa	Cytek	post-VDZ	sigmoid	I	no	exposed	32	0	0	8	4	4	127	28	7	64	5	8	590	240	31	45	13	128	346	67	10	72	13
9	mucosa	Cytek	pre-VDZ	sigmoid	I	yes	naive	582	104	25	795	1554	718	6274	1951	1846	1247	18	3181	26994	4674	287	870	805	2157	7065	773	5	272	864
10	mucosa	Cytek	post-VDZ	rectum	NI	yes	naive	62	4	9	41	18	47	2025	763	4545	552	88	314	7061	2662	35	373	63	757	2826	268	259	86	286
11	mucosa	Cytek	post-VDZ	sigmoid	NI	yes	naive	78	2	11	115	23	30	660	2837	16764	935	29	545	9057	3211	27	567	88	875	3269	409	322	115	907
12	mucosa	Cytek	post-VDZ	sigmoid	I	yes	exposed	198	36	2	29	394	206	1238	2216	1029	537	67	173	4431	4602	451	297	221	1729	3986	164	146	464	238
13	mucosa	Cytek	pre-VDZ	sigmoid	I	yes	naive	638	174	1	315	2532	275	1048	533	204	385	234	12336	12171	11502	897	725	1991	1775	4615	635	0	254	764
14	mucosa	Cytek	post-VDZ	sigmoid	NI	yes	naive	45	2	3	33	18	4	255	111	178	143	38	44	2822	1043	127	125	8	153	822	39	116	112	38
15	mucosa	Cytek	pre-VDZ	sigmoid	I	yes	exposed	1225	60	8	219	382	242	2459	1072	417	128	25	217	7877	1908	384	661	116	1154	2218	193	1	115	144
16	mucosa	Cytek	pre-VDZ	sigmoid	NI	no	exposed	60	5	128	471	337	78	1094	360	2430	637	10	710	5514	1006	34	5159	357	548	2636	843	5	603	266
17	mucosa	Cytek	post-VDZ	sigmoid	NI	no	exposed	193	31	23	163	94	36	1245	173	438	602	23	140	4718	887	93	3408	134	537	1866	628	568	168	87
18	mucosa	Cytek	pre-VDZ	rectum	I	no	exposed	1263	601	6	1234	10055	1463	4058	915	583	612	566	4454	22508	24563	1911	2487	3093	3175	5821	1434	7	1263	1887
19	mucosa	Cytek	pre-VDZ	sigmoid	NI	no	exposed	18	12	6	220	1036	254	1117	179	753	305	79	814	4920	1108	32	336	225	178	545	113	124	84	78
20	mucosa	Cytek	post-VDZ	sigmoid	NI	no	exposed	56	3	20	113	9	9	108	143	2042	282	398	166	1318	5562	46	96	32	254	697	51	68	153	90
21	mucosa	Cytek	pre-VDZ	rectum	NI	yes	naive	576	22	2	148	407	62	1089	152	207	79	91	520	9192	1021	71	767	252	447	2135	466	2	209	86
22	mucosa	Cytek	pre-VDZ	sigmoid	NI	yes	naive	22	0	8	106	104	21	743	102	458	261	85	322	7641	2012	23	899	145	535	2466	412	8	242	67
23	mucosa	Cytek	post-VDZ	rectum	I	yes	naive	694	163	3	211	4386	1152	12867	1131	319	133	364	4641	26070	32144	1873	1215	1851	2058	6719	601	8	420	936
24	mucosa	Cytek	post-VDZ	sigmoid	NI	yes	naive	9	0	2	7	18	24	793	142	718	209	108	361	6451	3699	59	580	114	768	1838	374	290	61	20
25	mucosa	Cytek	pre-VDZ	descendens	I	yes	naive	354	102	6	215	1268	674	3952	595	102	133	3	9253	11552	3455	712	252	278	664	2241	605	0	83	571
26	mucosa	Cytek	post-VDZ	sigmoid	NI	yes	naive	199	5	2	46	63	63	930	845	175	24	27	35	1524	2279	298	100	32	248	605	114	26	4	40
27	mucosa	Cytek	post-VDZ	sigmoid	I	no	exposed	217	7	1	45	34	19	249	379	138	1454	27	90	6211	1118	170	371	83	946	2968	264	2	358	143
28	mucosa	Cytek	post-VDZ	sigmoid	NI	no	exposed	57	0	5	55	19	16	473	142	465	2389	101	123	12255	1099	40	661	75	2436	11534	406	10	251	241
29	mucosa	Cytek	pre-VDZ	descendens	NI	yes	naive	113	3	24	108	25	18	331	1148	2582	827	16	184	5780	2833	36	391	104	1673	5586	234	136	117	241
PBMCs scRNAseq
sample	tissue	technique	timepoint	response by PGA	TNF_status	ASDC	B intermediate	B memory	B naive	CD14 Mono	CD16 Mono	CD4 CTL	CD4 Naive	CD4 Proliferating	CD4 TCM	CD4 TEM	CD8 Naive	CD8 Proliferating	CD8 TCM	CD8 TEM	cDC1	cDC2	dnT	Eryth	gdT	HSPC	ILC	MAIT	NK	NK Proliferating	NK_CD56bright	pDC	Plasmablast	Platelet	Treg
1	PBMCs	scRNAseq	pre-VDZ	yes	naive	0	31	39	78	246	53	12	284	6	293	31	61	1	15	362	1	24	6	6	15	4	2	1	79	2	3	9	15	11	37
2	PBMCs	scRNAseq	post-VDZ	yes	naive	1	27	24	50	503	4	9	118	2	261	44	21	0	4	322	1	25	3	4	16	4	0	5	46	0	4	7	1	24	26
3	PBMCs	scRNAseq	pre-VDZ	yes	naive	0	17	13	18	16	29	25	275	0	164	30	60	0	5	270	0	2	6	73	17	119	0	0	12	0	2	0	3	8	39
4	PBMCs	scRNAseq	post-VDZ	yes	naive	0	32	21	26	170	61	64	375	4	445	48	106	0	10	417	2	25	4	8	36	3	2	3	61	0	3	9	6	11	35
5	PBMCs	scRNAseq	pre-VDZ	yes	naive	1	26	36	55	201	8	3	183	1	312	30	19	0	10	35	0	7	0	89	11	18	8	1	21	0	3	0	0	5	12
6	PBMCs	scRNAseq	pre-VDZ	yes	naive	0	24	34	35	237	14	3	262	0	452	78	51	0	15	82	2	18	0	4	8	2	3	22	28	1	1	1	3	13	28
7	PBMCs	scRNAseq	post-VDZ	yes	naive	0	5	4	2	47	0	0	9	0	27	0	0	0	2	7	0	0	0	1	1	0	0	0	2	0	0	0	0	1	3
8	PBMCs	scRNAseq	pre-VDZ	yes	exposed	0	168	132	162	215	4	6	208	1	535	68	79	1	16	187	0	1	1	102	101	4	11	6	108	0	12	0	5	4	27
9	PBMCs	scRNAseq	post-VDZ	yes	exposed	2	42	32	45	353	46	3	303	0	290	21	51	0	12	104	0	12	1	11	9	3	2	4	129	0	3	7	5	7	40
10	PBMCs	scRNAseq	pre-VDZ	no	exposed	1	21	20	8	163	21	0	207	0	296	15	13	0	4	150	0	2	3	51	9	4	0	3	14	0	2	0	6	23	35
11	PBMCs	scRNAseq	post-VDZ	no	exposed	0	26	31	14	281	15	1	662	0	801	26	17	0	15	102	1	28	0	9	7	5	2	2	8	0	8	2	5	12	45
12	PBMCs	scRNAseq	pre-VDZ	yes	exposed	0	2	1	1	4	2	0	9	0	6	5	4	0	1	6	0	0	0	94	1	1	0	0	14	0	1	0	1	0	0
13	PBMCs	scRNAseq	post-VDZ	yes	exposed	0	0	0	1	30	4	12	12	0	50	6	3	0	2	39	0	12	1	12	11	1	0	0	23	2	0	5	1	1	4
14	PBMCs	scRNAseq	pre-VDZ	yes	exposed	1	31	28	111	571	8	1	465	2	466	28	125	0	26	57	1	30	1	41	15	5	3	7	89	1	5	0	11	26	49
15	PBMCs	scRNAseq	post-VDZ	yes	exposed	8	31	32	82	154	25	1	255	0	370	65	51	0	4	66	0	13	0	99	55	3	4	3	14	0	3	12	2	3	33
16	PBMCs	scRNAseq	pre-VDZ	no	exposed	0	38	24	54	44	7	4	118	0	70	9	67	0	2	70	0	0	1	56	15	11	3	0	9	0	1	1	0	3	8
17	PBMCs	scRNAseq	post-VDZ	no	exposed	0	28	29	18	216	31	16	310	3	247	24	236	0	10	116	0	4	15	27	18	145	8	4	50	1	4	2	1	6	20
18	PBMCs	scRNAseq	pre-VDZ	yes	naive	6	56	57	31	1462	46	7	439	12	508	59	314	0	20	146	1	18	11	29	59	192	8	20	163	0	4	7	166	14	19
19	PBMCs	scRNAseq	post-VDZ	yes	naive	1	51	43	42	210	52	0	513	2	300	37	204	0	9	81	1	18	6	20	29	2	2	4	126	0	12	5	5	6	21
20	PBMCs	scRNAseq	pre-VDZ	yes	exposed	0	14	26	20	160	65	1	240	1	175	35	66	0	11	147	1	17	1	10	14	17	1	7	15	0	5	2	1	4	13
21	PBMCs	scRNAseq	post-VDZ	yes	exposed	1	27	18	10	221	118	0	158	0	185	12	54	0	11	52	0	10	5	22	8	9	2	0	111	4	9	8	7	16	18
22	PBMCs	scRNAseq	pre-VDZ	yes	exposed	3	22	7	25	360	44	84	565	4	438	55	137	0	8	539	1	16	5	30	27	15	2	0	40	1	6	15	17	6	46
23	PBMCs	scRNAseq	post-VDZ	yes	exposed	2	42	33	67	322	138	124	829	2	483	34	110	0	8	688	0	19	7	27	19	31	2	2	86	2	12	16	10	14	53
24	PBMCs	scRNAseq	pre-VDZ	no	exposed	5	32	8	69	893	135	15	703	3	739	56	127	0	13	144	1	46	5	186	231	2	3	13	625	3	31	10	12	20	90
25	PBMCs	scRNAseq	post-VDZ	no	exposed	4	28	40	103	439	45	9	983	1	647	33	173	0	8	206	1	24	4	49	72	46	1	10	609	0	30	12	5	55	40
26	PBMCs	scRNAseq	pre-VDZ	no	exposed	1	43	37	19	206	44	62	360	3	395	37	70	0	9	1007	1	29	9	45	61	0	1	0	76	7	2	3	11	7	61
27	PBMCs	scRNAseq	post-VDZ	no	exposed	0	23	24	19	225	15	23	145	0	180	26	35	0	4	705	1	11	1	21	44	5	0	1	38	0	1	4	1	17	40
28	PBMCs	scRNAseq	pre-VDZ	no	exposed	0	30	26	296	945	202	6	68	1	368	38	21	0	68	133	1	12	1	48	49	1	1	4	399	3	23	6	8	45	64
29	PBMCs	scRNAseq	post-VDZ	no	exposed	1	21	43	181	507	310	1	50	1	297	76	6	0	70	196	0	18	3	32	33	62	1	3	297	5	16	4	22	32	60
30	PBMCs	scRNAseq	pre-VDZ	yes	naive	2	261	198	64	307	29	4	526	0	815	67	103	0	30	102	1	29	3	37	40	3	1	3	40	0	6	1	37	2	63
31	PBMCs	scRNAseq	post-VDZ	yes	naive	0	25	30	9	94	29	4	205	0	280	24	36	0	9	27	3	7	1	9	11	1	1	1	27	0	8	1	0	5	19
32	PBMCs	scRNAseq	pre-VDZ	yes	exposed	0	140	114	616	811	10	6	175	1	203	19	234	0	11	248	0	8	4	23	19	2	0	1	29	2	6	0	53	33	29
33	PBMCs	scRNAseq	post-VDZ	yes	exposed	1	20	22	138	179	32	21	43	0	150	22	101	0	13	451	1	4	3	26	25	0	0	3	120	2	24	4	4	6	10
34	PBMCs	scRNAseq	pre-VDZ	yes	naive	0	6	3	8	245	42	2	597	0	375	23	62	0	6	87	1	11	2	17	6	1	0	0	7	2	4	1	0	5	29
35	PBMCs	scRNAseq	pre-VDZ	yes	exposed	3	94	56	66	638	119	7	197	4	267	24	72	0	7	49	3	16	4	25	49	6	0	11	3	0	4	5	7	14	27
36	PBMCs	scRNAseq	post-VDZ	yes	exposed	8	128	126	138	620	110	10	529	4	463	68	146	1	9	50	5	34	7	38	63	9	3	15	225	7	19	16	10	10	60
37	PBMCs	scRNAseq	pre-VDZ	no	exposed	6	32	22	25	934	175	3	340	4	504	51	177	0	18	97	10	89	4	28	91	1	1	51	82	4	27	15	16	11	50
38	PBMCs	scRNAseq	post-VDZ	no	exposed	0	7	5	15	162	23	2	190	0	157	12	74	0	19	38	2	13	2	12	26	4	0	20	35	0	11	6	7	9	15
39	PBMCs	scRNAseq	pre-VDZ	no	exposed	3	40	34	41	427	76	1	328	0	460	46	82	0	19	69	0	30	9	15	31	3	1	4	361	2	10	8	15	20	40
40	PBMCs	scRNAseq	post-VDZ	no	exposed	0	12	16	37	31	6	0	147	0	187	5	31	0	4	3	0	1	1	41	21	0	2	1	15	0	5	1	0	3	21
41	PBMCs	scRNAseq	pre-VDZ	yes	naive	6	26	20	41	255	186	0	502	0	578	86	170	1	12	117	3	30	2	45	40	12	1	30	106	2	17	15	3	11	34
42	PBMCs	scRNAseq	post-VDZ	yes	naive	4	44	20	18	300	101	3	346	2	622	84	175	0	15	72	8	24	0	17	35	3	3	37	100	3	9	6	9	2	45
43	PBMCs	scRNAseq	pre-VDZ	yes	naive	2	47	38	28	1224	375	3	425	12	463	38	31	7	5	193	0	14	7	16	22	5	0	1	11	1	0	23	78	39	37
44	PBMCs	scRNAseq	post-VDZ	yes	naive	2	38	41	13	332	67	3	271	0	581	70	15	0	13	257	0	34	3	33	33	26	1	1	6	0	2	29	2	13	27
45	PBMCs	scRNAseq	pre-VDZ	no	naive	1	49	40	251	367	116	1	257	3	271	31	60	0	9	104	0	9	10	163	106	0	1	6	171	3	27	4	8	27	27
46	PBMCs	scRNAseq	pre-VDZ	yes	naive	3	40	46	159	21	69	0	346	1	301	31	303	0	11	63	2	17	3	29	42	10	4	2	157	2	32	2	2	5	42
47	PBMCs	scRNAseq	pre-VDZ	no	exposed	0	81	21	54	104	2	9	97	0	239	64	64	0	8	206	0	2	1	77	78	0	8	9	188	0	2	0	0	8	20
48	PBMCs	scRNAseq	post-VDZ	no	exposed	0	67	24	64	335	35	66	227	3	333	70	129	0	16	755	0	13	12	37	119	3	1	15	943	3	13	6	0	5	45
49	PBMCs	scRNAseq	pre-VDZ	no	exposed	1	37	13	96	859	157	3	342	9	537	15	35	0	12	50	1	35	4	46	9	14	2	6	128	5	8	11	25	67	50
50	PBMCs	scRNAseq	post-VDZ	no	exposed	0	7	13	39	74	6	0	174	1	257	11	18	0	2	19	0	4	1	58	10	1	1	0	8	0	3	2	1	4	11
PBMCs spectral flow cytometry (cytek)
sample	tissue	technique	timepoint	response by PGA	TNF_status	Non-classical monocytes	Intermediate monocytes	Classical monocytes	CD14dCD16d	CD1c-CD141- DCs	CD1c-CD141+ DCs	CD123+ pDCs	CD1c+ DCs	ILCs	early NK (CD56bCD16-)	Mature NK (CD56dCD16b)	Terminal NK (CD56-CD16b)	Naive B cells	Plasmablasts	memory B cells	Transitional B cells	gd T cells	NKT cells	CD4-CD8- T cells	CD4+CD8+ T cells	Tregs	Naive CD4+ T cells	Transitional central memory CD4+ T cells	Central memory CD4+ T cells	Effector memory CD4+ T cells	Late effector memory CD4+ T cells	Effector memory CD4+ T cells re-expresses CD45RA (TEMRA)	Naive CD8+ T cells	Effector memory CD8+T cells re-expresses CD45RA (TEMRA)	Effector memory CD8+ T cells	Central memory CD8+ T cells	Transitional central memory CD8+ T cells	Late effector memory CD8+ T cells
1	PBMCs	Cytek	post-VDZ	no	exposed	92	49	1566	6	34	67	0	77	4	125	1154	6	110	6	56	9	18	89	71	10	110	3672	434	748	115	4	0	732	82	41	18	53	64
2	PBMCs	Cytek	pre-VDZ	no	exposed	82	88	1440	11	18	23	0	62	9	130	827	7	76	25	34	37	350	46	56	8	222	3892	443	580	146	9	18	659	104	44	8	25	52
3	PBMCs	Cytek	pre-VDZ	yes	naive	45	34	1786	19	10	17	9	138	3	32	131	6	50	46	128	2	79	38	28	45	186	2714	733	1927	633	35	11	354	116	138	73	135	125
4	PBMCs	Cytek	post-VDZ	yes	naive	102	49	1052	7	34	10	53	78	7	66	101	2	125	25	355	1	85	20	41	41	183	2491	573	1504	1377	110	83	410	186	164	44	71	218
5	PBMCs	Cytek	pre-VDZ	yes	naive	20	33	2574	2	23	9	11	36	6	14	365	4	131	253	172	8	159	17	77	11	92	1845	476	878	519	63	8	1493	105	93	40	93	92
6	PBMCs	Cytek	pre-VDZ	yes	exposed	6	6	2607	6	6	3	0	17	17	24	134	5	342	116	60	14	94	19	105	22	140	1212	362	876	370	36	4	1818	622	132	34	98	425
7	PBMCs	Cytek	pre-VDZ	yes	exposed	30	28	2463	5	9	3	5	21	5	13	318	19	648	70	104	57	130	38	35	8	29	242	91	244	203	25	5	1356	1841	279	38	82	927
8	PBMCs	Cytek	post-VDZ	yes	exposed	87	72	1052	4	14	11	45	45	4	164	524	13	301	14	65	108	168	139	41	25	88	426	134	620	586	88	25	1119	1962	409	68	79	1131
9	PBMCs	Cytek	post-VDZ	no	exposed	27	17	625	10	8	3	15	42	4	14	5	1	73	6	284	0	18	28	11	10	159	5549	1004	1081	206	40	6	199	244	54	36	58	54
10	PBMCs	Cytek	pre-VDZ	yes	naive	59	43	502	8	24	3	10	27	11	29	43	4	147	21	157	7	375	594	59	22	129	2239	413	989	900	160	134	524	756	342	72	93	730
11	PBMCs	Cytek	post-VDZ	yes	naive	128	60	921	4	8	11	38	61	6	57	95	0	126	7	151	2	344	686	37	23	158	2281	478	989	795	110	112	639	545	271	54	55	538
12	PBMCs	Cytek	pre-VDZ	no	exposed	236	243	3333	11	19	24	77	157	13	103	112	12	54	33	43	0	313	108	92	149	169	1418	288	1125	661	30	14	520	93	104	31	57	194
13	PBMCs	Cytek	post-VDZ	no	exposed	196	111	2327	22	19	27	80	217	4	56	277	2	58	18	70	0	288	90	117	203	187	1925	434	1227	492	30	10	738	127	137	24	90	203
14	PBMCs	Cytek	pre-VDZ	no	exposed	121	96	3472	13	22	28	36	123	16	63	64	3	64	63	112	1	197	73	79	154	115	1581	323	1204	692	32	9	697	90	97	15	67	175
15	PBMCs	Cytek	pre-VDZ	no	naive	542	101	3060	15	14	8	55	33	1	298	378	2	162	17	52	85	489	24	63	12	132	2192	211	500	220	22	8	481	99	65	20	27	82
16	PBMCs	Cytek	post-VDZ	yes	exposed	936	117	2173	28	87	39	60	146	7	58	697	62	41	14	133	9	80	36	61	65	131	1567	438	1077	332	14	6	506	305	150	116	101	126
17	PBMCs	Cytek	pre-VDZ	yes	exposed	417	93	1733	7	45	16	31	86	6	38	35	1	78	9	122	2	141	114	53	49	110	2010	645	1309	368	19	3	959	454	237	157	183	274
18	PBMCs	Cytek	pre-VDZ	no	exposed	322	424	6686	11	192	7	74	99	3	29	340	4	174	96	76	11	22	16	1	0	29	459	157	305	188	5	1	8	14	38	6	2	17
19	PBMCs	Cytek	post-VDZ	no	exposed	55	41	1469	3	11	9	7	50	3	8	134	4	32	2	34	2	279	1309	6	25	122	1235	324	509	357	25	4	243	1454	81	14	49	1619
20	PBMCs	Cytek	pre-VDZ	no	exposed	77	58	899	7	6	13	12	56	0	4	178	2	25	20	56	1	271	1255	18	19	109	1484	413	699	364	36	15	321	1443	107	18	59	1384
21	PBMCs	Cytek	pre-VDZ	yes	naive	455	197	2244	6	21	2	56	24	2	2	16	3	69	165	106	1	47	28	29	12	60	3802	698	872	151	37	29	109	327	65	25	76	152
22	PBMCs	Cytek	post-VDZ	yes	naive	191	107	2206	24	11	26	182	170	6	18	2	0	42	17	106	1	34	100	11	44	159	2795	657	1296	463	54	20	118	540	172	67	76	231
23	PBMCs	Cytek	post-VDZ	no	exposed	87	41	1496	11	7	8	45	46	18	41	403	5	201	12	170	0	88	56	33	18	70	1890	311	789	641	44	14	2378	299	159	18	37	291
24	PBMCs	Cytek	post-VDZ	yes	exposed	140	60	1134	7	9	3	44	65	6	40	925	4	127	5	108	35	127	30	25	13	245	2815	592	1393	364	93	20	599	294	145	29	71	162
25	PBMCs	Cytek	pre-VDZ	no	exposed	494	151	2849	8	38	9	36	36	5	112	1218	53	226	15	29	231	228	23	53	105	182	296	262	1053	358	41	11	150	153	391	279	204	304
26	PBMCs	Cytek	post-VDZ	no	exposed	873	371	2247	6	52	8	30	66	10	101	1100	79	220	6	36	189	159	30	50	110	251	219	224	1123	346	21	9	145	191	443	330	237	337
27	PBMCs	Cytek	pre-VDZ	no	exposed	182	124	2052	6	52	10	34	15	4	52	2246	143	185	44	91	244	141	35	93	104	139	124	210	1111	271	25	6	95	152	381	382	257	273
28	PBMCs	Cytek	pre-VDZ	yes	exposed	9	31	2453	5	16	9	3	30	24	11	338	1	777	35	258	41	66	46	22	9	117	2119	533	758	582	65	60	751	163	152	27	38	108
29	PBMCs	Cytek	pre-VDZ	yes	exposed	16	35	2569	14	5	8	11	78	16	10	300	0	374	38	118	15	58	21	22	22	185	2902	619	907	434	39	14	628	94	170	53	44	69
30	PBMCs	Cytek	pre-VDZ	no	exposed	168	94	1986	12	16	20	37	92	2	58	883	28	77	26	63	3	44	15	21	15	147	3318	650	810	307	27	11	593	44	44	19	97	70
31	PBMCs	Cytek	pre-VDZ	yes	naive	427	214	1120	10	46	40	110	68	15	144	161	2	61	9	66	1	28	129	34	20	222	2959	448	1011	465	82	37	1203	150	86	16	22	110
32	PBMCs	Cytek	pre-VDZ	yes	naive	24	23	986	11	15	12	19	83	25	26	12	1	181	5	85	4	33	90	58	41	374	3934	566	1232	331	94	30	1351	54	48	28	55	72
33	PBMCs	Cytek	pre-VDZ	yes	naive	113	67	1395	2	10	4	28	40	11	25	396	21	281	17	101	29	83	69	75	39	172	2402	514	677	439	57	38	344	546	742	119	76	532
34	PBMCs	Cytek	post-VDZ	yes	naive	12	13	861	4	8	11	22	56	10	23	261	40	603	5	251	65	67	48	40	14	136	2351	467	812	399	35	6	314	564	661	194	119	545
35	PBMCs	Cytek	pre-VDZ	yes	naive	62	80	1364	1	18	8	15	28	5	51	20	8	77	6	15	8	25	4	38	20	117	5294	616	644	138	25	14	609	272	93	23	44	93
36	PBMCs	Cytek	pre-VDZ	yes	exposed	126	272	3807	14	28	16	30	92	3	26	3	1	163	29	146	3	326	67	56	8	114	1703	548	1254	246	11	4	536	43	69	45	79	60
37	PBMCs	Cytek	pre-VDZ	yes	exposed	97	152	3028	12	7	17	85	119	10	36	6	1	69	10	81	2	579	52	37	19	130	2438	510	1072	377	17	3	615	64	92	60	78	58
38	PBMCs	Cytek	post-VDZ	yes	exposed	109	127	2835	16	17	22	68	101	8	108	507	6	149	18	196	24	270	48	42	17	122	2298	415	1006	215	13	4	565	36	83	56	60	53
39	PBMCs	Cytek	post-VDZ	no	exposed	57	40	1030	7	11	0	12	26	10	48	1850	371	55	2	53	5	434	313	41	9	187	1040	231	633	671	100	74	551	665	337	37	94	541
40	PBMCs	Cytek	pre-VDZ	no	exposed	54	66	1734	10	10	17	21	54	6	27	807	64	103	7	38	2	270	208	40	28	199	1584	323	901	857	118	52	770	505	285	55	115	383
41	PBMCs	Cytek	pre-VDZ	no	exposed	1	0	845	26	13	7	13	23	22	12	766	58	445	5	218	1	262	247	54	27	102	1585	339	1009	803	129	72	766	487	220	62	122	420
42	PBMCs	Cytek	pre-VDZ	yes	exposed	2	15	933	9	16	9	31	29	7	40	327	5	212	8	284	9	656	115	69	48	117	1489	422	1478	1151	97	22	906	377	332	59	98	357
43	PBMCs	Cytek	pre-VDZ	yes	naive	41	18	809	11	11	3	6	46	4	13	95	0	358	2	255	9	24	80	46	25	229	2770	1080	2189	654	57	9	399	203	83	72	69	125
44	PBMCs	Cytek	post-VDZ	yes	naive	17	11	737	15	29	4	29	96	7	23	70	0	217	1	126	2	33	85	61	30	207	3234	795	1969	691	68	11	409	233	88	70	88	143
45	PBMCs	Cytek	pre-VDZ	yes	exposed	17	7	137	3	20	1	4	10	6	23	35	0	103	19	50	2	36	46	46	11	150	3758	696	811	717	73	97	659	516	312	31	63	609
46	PBMCs	Cytek	post-VDZ	yes	exposed	162	83	1088	8	16	5	55	51	3	39	147	6	120	10	78	4	0	87	40	8	93	2511	511	867	819	60	30	507	481	389	19	34	930
47	PBMCs	Cytek	pre-VDZ	yes	exposed	27	67	4756	12	13	6	16	78	0	21	31	2	117	24	41	9	15	21	44	6	132	1985	435	539	338	24	6	449	168	63	14	20	166
48	PBMCs	Cytek	post-VDZ	no	exposed	16	13	898	5	10	2	38	29	11	52	255	17	463	0	160	59	25	5	37	16	232	4759	788	620	178	28	8	846	22	27	26	79	35
[truncated: 12 more columns]

## Sheet: Supplementary Table 8
Supplementary Table 8
Changes in cell composition of the mucosa and PBMCs in responders and non-responders after 14 weeks of treatment with vedolizumab
This table provides additional detailed data pertaining to Figure 3, Extended Data Figure 6 and Extended Data Figure 7
PBMCs, peripheral blood mononuclear cells; VDZ, vedolizumab; pre-VDZ, 2 weeks prior to vedolizumab treatment; post-VDZ, 14 weeks after vedolizumab treatment.
Statistical analysis was performed using two methods: the Bayesian multinomial logistic regression (pibble model) with the credible intervals (CI) 75%, 90% and 95%, and the Wilcoxon rank sum test (p value < 0.05). For each cell type, the direction of change post-VDZ is shown in column “change” and level of significance is recorded as CI (for pibble) and p value (for Wilcoxon test), while “–” repr…
Some cell types from the mucosal Cytek dataset were merged to match cell types identified in the mucosal scRNA-seq dataset. Specifically, “CD4+ naive T cells” included CD25– CD4+ naive T cells and CD45RA+CD25dim CD4+ naive T cells, “CD4+ TEM” included CD25dim CD4+ TEM and CD25int CD4+ TEM, and “Tregs” included CD25high memory Tregs and CD25int naive Tregs.
Responders, changes post-VDZ (compared to pre-VDZ)							Non-responders, changes post-VDZ (compared to pre-VDZ)
tissue	compartment	cell type	change	CI	P value	technique	tissue	compartment	cell type	change	CI	P value	technique
mucosa	epithelium	Enterocyte progenitors	increase	0.95	0.013	scRNAseq	mucosa	stroma	Glia	increase	0.95	0.010	scRNAseq
mucosa	epithelium	BEST4+ enterocytes	increase	0.95	0.0002	scRNAseq	mucosa	stroma	WNT2B+ Fos-lo 1	increase	0.75	-	scRNAseq
mucosa	epithelium	Immature enterocytes 2	increase	0.9	0.023	scRNAseq	mucosa	stroma	RSPO3+ fibroblasts	increase	0.75	0.026	scRNAseq
mucosa	epithelium	Goblet	increase	0.9	0.038	scRNAseq	mucosa	stroma	WNT5B+ 1	increase	0.75	-	scRNAseq
mucosa	epithelium	Immature goblet	increase	0.95	-	scRNAseq	mucosa	stroma	Microvascular	increase	0.75	-	scRNAseq
mucosa	epithelium	M cells	increase	0.75	-	scRNAseq	mucosa	stroma	Myofibroblasts	increase	0.75	-	scRNAseq
mucosa	epithelium	Cycling TA	increase	0.95	0.008	scRNAseq	mucosa	immune	CD4+ activated Fos-lo	decrease	0.75	-	scRNAseq
mucosa	epithelium	Secretory TA	increase	0.95	0.0001	scRNAseq	mucosa	immune	DC2	decrease	0.75	-	scRNAseq
mucosa	epithelium	TA 1	increase	0.75	-	scRNAseq	mucosa	immune	CD4+ TCM	increase	0.75	-	Cytek
mucosa	epithelium	TA 2	increase	0.95	0.004	scRNAseq	mucosa	immune	CD8+ TEM	increase	0.9	-	Cytek
mucosa	epithelium	Stem	increase	0.95	0.0004	scRNAseq	mucosa	immune	CD8+ TCM	increase	0.9	-	Cytek
mucosa	epithelium	Paneth-like cells	decrease	0.95	-	scRNAseq	mucosa	immune	B non-switch	decrease	0.95	-	Cytek
mucosa	stroma	WNT5B+ 1	increase	0.95	-	scRNAseq	mucosa	immune	B naive	decrease	0.95	-	Cytek
mucosa	stroma	WNT5B+ 2	increase	0.95	0.017	scRNAseq	mucosa	immune	γδ T	increase	0.9	-	Cytek
mucosa	stroma	WNT2B+ Fos-lo 1	increase	0.95	0.043	scRNAseq	mucosa	immune	DCs	decrease	0.95	-	Cytek
mucosa	stroma	WNT2B+ Fos-hi	increase	0.9	-	scRNAseq	PBMCs	immune	CD4+ naïve	increase	0.75	-	scRNAseq
mucosa	stroma	RSPO3+ fibroblasts	increase	0.9	-	scRNAseq	PBMCs	immune	CD4+ TCM	increase	0.75	-	scRNAseq
mucosa	stroma	Myfibroblasts	increase	0.75	-	scRNAseq	PBMCs	immune	NK proliferating	decrease	0.75	-	scRNAseq
mucosa	stroma	Inflammatory fibroblasts	decrease	0.95	0.041	scRNAseq	PBMCs	immune	B intermediate	decrease	-	0.011	scRNAseq
mucosa	immune	CD4+ PD1+	decrease	0.95	-	scRNAseq	PBMCs	immune	CD4+ naïve	increase	0.75	-	Cytek
mucosa	immune	CD4+ TCM	decrease	0.75	-	scRNAseq	PBMCs	immune	CD4+ transitional TCM	increase	0.75	-	Cytek
mucosa	immune	CD4+ activated Fos-lo	decrease	0.95	0.032	scRNAseq	PBMCs	immune	Tregs	increase	0.75	-	Cytek
mucosa	immune	CD8+ IL17+	decrease	0.95	-	scRNAseq	PBMCs	immune	CD8+ naïve	increase	0.75	-	Cytek
mucosa	immune	Cycling T	decrease	0.95	-	scRNAseq	PBMCs	immune	Plasmablasts	decrease	0.95	0.004	Cytek
mucosa	immune	GC	decrease	0.75	-	scRNAseq
mucosa	immune	IgM	decrease	0.95	-	scRNAseq
mucosa	immune	NKs	decrease	0.95	-	scRNAseq
mucosa	immune	DC1	decrease	0.75	-	scRNAseq
mucosa	immune	DC2	decrease	0.95	-	scRNAseq
mucosa	immune	Inflammatory monocytes	decrease	0.95	0.023	scRNAseq
mucosa	immune	Macrophages	decrease	0.95	-	scRNAseq
mucosa	immune	CD69– mast	decrease	0.95	-	scRNAseq
mucosa	immune	CD4+ TEM	increase	0.75	-	Cytek
mucosa	immune	CD4+ naive	decrease	0.75	-	Cytek
mucosa	immune	CD4+ TCM	decrease	-	0.034	Cytek
mucosa	immune	CD8+ naive	decrease	0.95	0.017	Cytek
mucosa	immune	B naive	decrease	0.95	0.027	Cytek
mucosa	immune	B non-switch	decrease	0.75	-	Cytek
mucosa	immune	DCs	decrease	0.95	0.005	Cytek
mucosa	immune	CD123+ pDCs	decrease	0.9	-	Cytek
mucosa	immune	Macrophages	decrease	0.75	-	Cytek
mucosa	immune	ILCs	increase	0.95	0.007	Cytek
mucosa	immune	Plasmablasts	increase	0.75	-	Cytek
PBMCs	immune	CD4+ CTL	increase	0.75	-	scRNAseq
PBMCs	immune	NKs	increase	0.9	-	scRNAseq
PBMCs	immune	cDC2	increase	0.75	-	scRNAseq
PBMCs	immune	pDCs	increase	0.95	0.039	scRNAseq
PBMCs	immune	Plasmablasts	decrease	0.95	-	scRNAseq
PBMCs	immune	CD8+ Naive	decrease	0.75	-	Cytek
PBMCs	immune	CD4–CD8– T cells	decrease	0.95	-	Cytek
PBMCs	immune	NK mature	increase	0.75	-	Cytek
PBMCs	immune	NK early	increase	0.75	0.024	Cytek
PBMCs	immune	CD123+ pDCs	increase	0.95	0.004	Cytek
PBMCs	immune	CD1c+ DCs	increase	-	0.046	Cytek
PBMCs	immune	Non-classical monocytes	increase	0.75	-	Cytek
PBMCs	immune	Plasmablasts	decrease	0.95	-	Cytek

## Sheet: Supplementary Table 9
Supplementary Table 9
Changes in cell composition of the mucosa and PBMCs in non-responders 2 weeks prior to vedolizumab treatment (pre-VDZ) and 14 weeks after (post-VDZ) compared to responders
This table provides additional detailed data pertaining to Figure 3, Extended Data Figure 6 and Extended Data Figure 7
PBMCs, peripheral blood mononuclear cells; VDZ, vedolizumab; pre-VDZ, 2 weeks prior to vedolizumab treatment; post-VDZ, 14 weeks after vedolizumab treatment.
Statistical analysis was performed using two methods: the Bayesian multinomial logistic regression (pibble model) with the credible intervals (CI) 75%, 90% and 95%, and the Wilcoxon rank sum test (p value < 0.05). For each cell type, the direction of change post-VDZ is shown in column “change” and level of significance is recorded as CI (for pibble) and p value (for Wilcoxon test), while “–” repr…
Some cell types from the mucosal Cytek dataset were merged to match cell types identified in the mucosal scRNA-seq dataset. Specifically, “CD4+ naive T cells'' included CD25– CD4+ naive T cells and CD45RA+CD25dim CD4+ naive T cells, “CD4+ TEM” included CD25dim CD4+ TEM and CD25int CD4+ TEM, and “Tregs” included CD25high memory Tregs and CD25int naive Tregs.
Pre-VDZ, changes in non-responders (compared to responders)							Post-VDZ, changes in non-responders (compared to responders)
tissue	compartment	cell type	change	CI	P value	technique	tissue	compartment	cell type	change	CI	P value	technique
mucosa	epithelium	Enterocyte progenitors	increase	0.75	-	scRNAseq	mucosa	epithelium	Immature enterocytes 2	decrease	0.75	-	scRNAseq
mucosa	epithelium	Tuft	decrease	0.75	0.034	scRNAseq	mucosa	epithelium	BEST4+ enterocytes	decrease	0.75	-	scRNAseq
mucosa	stroma	Glia	decrease	0.9	-	scRNAseq	mucosa	epithelium	Immature goblet	decrease	0.95	0.012	scRNAseq
mucosa	immune	Cycling B	decrease	0.75	-	scRNAseq	mucosa	epithelium	Enteroendocrine	decrease	0.9	-	scRNAseq
mucosa	immune	Ig negative	increase	0.75	-	scRNAseq	mucosa	epithelium	M cells	decrease	0.95	-	scRNAseq
mucosa	immune	NKs	increase	0.75	-	scRNAseq	mucosa	epithelium	Cycling TA	decrease	0.95	0.006	scRNAseq
mucosa	immune	ILCs	increase	-	0.040	scRNAseq	mucosa	epithelium	Secretory TA	decrease	0.95	0.006	scRNAseq
mucosa	immune	DC2	increase	0.95	-	scRNAseq	mucosa	epithelium	TA 1	decrease	0.75	-	scRNAseq
mucosa	immune	Inflammatory monocytes	increase	0.75	-	scRNAseq	mucosa	epithelium	TA 2	decrease	0.9	-	scRNAseq
mucosa	immune	CD69– mast	decrease	0.9	-	scRNAseq	mucosa	epithelium	Stem	decrease	0.95	0.011	scRNAseq
mucosa	immune	CD69+ mast	decrease	0.75	-	scRNAseq	mucosa	epithelium	Tuft	decrease	0.75		scRNAseq
mucosa	immune	B memory	decrease	0.75	-	Cytek	mucosa	epithelium	Paneth-like cells	increase	-	0.014	scRNAseq
mucosa	immune	Macrophages	decrease	0.75	-	Cytek	mucosa	stroma	Inflammatory fibroblasts	increase	0.9	-	scRNAseq
mucosa	immune	NKs	increase	0.9	-	Cytek	mucosa	stroma	Activated Endothelial Cells	increase	0.75	-	scRNAseq
mucosa	immune	ILCs	increase	0.75	-	Cytek	mucosa	stroma	WNT2B+ Fos-lo 2	increase	0.75	-	scRNAseq
mucosa	immune	DCs	increase	0.9	-	Cytek	mucosa	immune	NKs	increase	0.95	-	scRNAseq
mucosa	immune	γδ T	increase	0.75	-	Cytek	mucosa	immune	DC1	increase	0.75	-	scRNAseq
PBMCs	immune	CD8+ naive	decrease	0.75	-	scRNAseq	mucosa	immune	DC2	increase	0.75	-	scRNAseq
PBMCs	immune	B memory	decrease	0.75	-	scRNAseq	mucosa	immune	Inflammatory monocytes	increase	0.95	-	scRNAseq
PBMCs	immune	NKs	increase	0.95	0.027	scRNAseq	mucosa	immune	Macrophages	increase	0.9	-	scRNAseq
PBMCs	immune	NK proliferating	increase	-	0.024	scRNAseq	mucosa	immune	CD8+ IL17+	increase	0.95	-	scRNAseq
PBMCs	immune	γδ T	increase	0.9	-	scRNAseq	mucosa	immune	Ig negative	increase	0.95	-	scRNAseq
PBMCs	immune	CD4+ naive	decrease	0.75	0.035	Cytek	mucosa	immune	IgG	increase	0.9	-	scRNAseq
PBMCs	immune	CD4+ transitional TCM	decrease	0.95	0.002	Cytek	mucosa	immune	IgM	increase	0.75	-	scRNAseq
PBMCs	immune	CD4+ late TEM	decrease	0.9	-	Cytek	mucosa	immune	CD4+ naive	increase	0.75	-	Cytek
PBMCs	immune	CD4+ TEMRA	decrease	0.75	-	Cytek	mucosa	immune	CD8+ TEM	increase	0.75	-	Cytek
PBMCs	immune	CD8+ naive	decrease	0.95	-	Cytek	mucosa	immune	CD8+ TCM	increase	0.75	-	Cytek
PBMCs	immune	CD8+ TEM	decrease	0.95	-	Cytek	mucosa	immune	CD8+ TEMRA	increase	0.75	-	Cytek
PBMCs	immune	CD8+ TEMRA	decrease	0.75	-	Cytek	mucosa	immune	B memory	decrease	0.75	-	Cytek
PBMCs	immune	CD4–CD8– T cells	decrease	0.75	-	Cytek	mucosa	immune	B naive	decrease	0.75	-	Cytek
PBMCs	immune	B memory	decrease	0.95	0.028	Cytek	mucosa	immune	B non-switch	decrease	0.9	-	Cytek
PBMCs	immune	B naive	decrease	0.75	-	Cytek	mucosa	immune	NKs	increase	0.9	-	Cytek
PBMCs	immune	NK mature	increase	0.95	0.001	Cytek	mucosa	immune	γδ T	increase	0.95	-	Cytek
PBMCs	immune	NK terminal	increase	0.95	0.006	Cytek	PBMCs	immune	γδ T	increase	0.75	-	scRNAseq
PBMCs	immune	NK early	increase	0.95	0.03	Cytek	PBMCs	immune	pDC	decrease	0.75	-	scRNAseq
PBMCs	immune	ILCs	decrease	0.9	-	Cytek	PBMCs	immune	cDC1	decrease	0.75	-	scRNAseq
PBMCs	immune	CD1c–CD141+ DCs	increase	-	0.04	Cytek	PBMCs	immune	ASDC	decrease	0.75	0.037	scRNAseq
PBMCs	immune	γδ T	increase	0.75	-	Cytek	PBMCs	immune	CD4+ TEMRA	decrease	0.75	-	Cytek
PBMCs	immune	Non-classical monocytes	increase	0.75	0.035	Cytek	PBMCs	immune	CD8+ TCM	decrease	-	0.037	Cytek
PBMCs	immune	Intermediate monocytes	increase	0.75	-	Cytek	PBMCs	immune	Tregs	increase	0.75	-	Cytek
							PBMCs	immune	CD8+ naïve	increase	0.75	-	Cytek
							PBMCs	immune	NK mature	increase	0.75	-	Cytek
							PBMCs	immune	Classical monocytes	increase	0.75	-	Cytek
							PBMCs	immune	CD123+ pDCs	decrease	0.9	-	Cytek
							PBMCs	immune	Plasmablasts	decrease	0.75	-	Cytek

## Sheet: Supplementary Table 10
Supplementary Table 10
The differential genes expressed by inflammatory monocytes, Tregs, Inflammatory fibroblasts, IgG, DCs, CD8+ IL17+, M cells, NKs, activated endothelial cells, and ILCs derived from responders and non-responders prior to VDZ treatment
This table provides additional detailed data pertaining to Figure 4 and 5, Extended Data Figure 8b-d and Extended Data Figure 9
VDZ, vedolizumab; pre-VDZ, study time point of 2 weeks prior to start of vedolizumab treatment; post-VDZ, study time point of 14 weeks after the start of vedolizumab treatment
tissue	technique	cell type	gene	p_val	avg_log2FC	pct.1	pct.2	p_val_adj using bonferroni	condition
mucosa	scRNAseq	inflammatory monocytes	S100A11	2.72639697797046e-36	0.643909249687635	0.902	0.935	9.14379018471732e-32	pre-VDZ, non-responders vs responders (responders as reference)
mucosa	scRNAseq	inflammatory monocytes	HNRNPA2B1	3.17551321290251e-34	-0.40215554648857	0.68	0.94	1.06500362134324e-29	pre-VDZ, non-responders vs responders (responders as reference)
mucosa	scRNAseq	inflammatory monocytes	ZFP36	3.96630127731233e-34	-0.756988535279097	0.609	0.884	1.33021812238501e-29	pre-VDZ, non-responders vs responders (responders as reference)
mucosa	scRNAseq	inflammatory monocytes	JCHAIN	1.47081497200388e-33	-0.655680963259673	0.314	0.648	4.93281925310663e-29	pre-VDZ, non-responders vs responders (responders as reference)
mucosa	scRNAseq	inflammatory monocytes	ACTR3	4.62565784021222e-33	-0.314164265807112	0.494	0.801	1.55135312645037e-28	pre-VDZ, non-responders vs responders (responders as reference)
mucosa	scRNAseq	inflammatory monocytes	HSPA1B	3.38660883876508e-32	-0.741143334257087	0.53	0.832	1.13580087234503e-27	pre-VDZ, non-responders vs responders (responders as reference)
mucosa	scRNAseq	inflammatory monocytes	HNRNPC	1.53746534879926e-31	-0.424700245140421	0.579	0.866	5.15635128680297e-27	pre-VDZ, non-responders vs responders (responders as reference)
mucosa	scRNAseq	inflammatory monocytes	HSPA1A	1.78833386428265e-31	-0.407314784429957	0.624	0.896	5.99771411403114e-27	pre-VDZ, non-responders vs responders (responders as reference)
mucosa	scRNAseq	inflammatory monocytes	WSB1	3.050801706255e-31	-0.468115514879313	0.522	0.822	1.0231778762438e-26	pre-VDZ, non-responders vs responders (responders as reference)
mucosa	scRNAseq	inflammatory monocytes	TNIP3	3.75789724778911e-31	-1.71680202963887	0.19	0.452	1.26032357896351e-26	pre-VDZ, non-responders vs responders (responders as reference)
mucosa	scRNAseq	inflammatory monocytes	IL1B	8.0278201832005e-30	-0.467694243060792	0.689	0.931	2.69237033304178e-25	pre-VDZ, non-responders vs responders (responders as reference)
mucosa	scRNAseq	inflammatory monocytes	FOS	2.0818106057183e-29	-0.610328334635736	0.759	0.948	6.98197640945802e-25	pre-VDZ, non-responders vs responders (responders as reference)
mucosa	scRNAseq	inflammatory monocytes	S100A6	7.27827754557988e-29	0.664304646477358	0.952	0.959	2.44098872323658e-24	pre-VDZ, non-responders vs responders (responders as reference)
mucosa	scRNAseq	inflammatory monocytes	TNFAIP3	2.34387380032803e-28	-0.826488856351506	0.634	0.881	7.86088395154014e-24	pre-VDZ, non-responders vs responders (responders as reference)
mucosa	scRNAseq	inflammatory monocytes	PFDN5	3.82041353287001e-28	0.503748187246918	0.809	0.899	1.28129029065395e-23	pre-VDZ, non-responders vs responders (responders as reference)
mucosa	scRNAseq	inflammatory monocytes	BCL2A1	5.45932075937519e-28	-0.421104298792664	0.606	0.871	1.83094699627925e-23	pre-VDZ, non-responders vs responders (responders as reference)
mucosa	scRNAseq	inflammatory monocytes	RPL35A	6.78768842218597e-28	0.320519430049613	0.771	0.897	2.27645494303273e-23	pre-VDZ, non-responders vs responders (responders as reference)
mucosa	scRNAseq	inflammatory monocytes	S100A4	8.91179365674556e-28	0.682549056406893	0.963	0.961	2.98883735659933e-23	pre-VDZ, non-responders vs responders (responders as reference)
mucosa	scRNAseq	inflammatory monocytes	NABP1	1.80298626565738e-27	-0.700608809917545	0.529	0.808	6.04685533776173e-23	pre-VDZ, non-responders vs responders (responders as reference)
mucosa	scRNAseq	inflammatory monocytes	TYROBP	2.90465441484092e-27	0.40936661736662	0.884	0.959	9.74162997649349e-23	pre-VDZ, non-responders vs responders (responders as reference)
mucosa	scRNAseq	inflammatory monocytes	RPL36AL	9.58046721453562e-27	0.321296703783005	0.599	0.747	3.21309709441096e-22	pre-VDZ, non-responders vs responders (responders as reference)
mucosa	scRNAseq	inflammatory monocytes	CTSB	1.37116833480441e-26	-0.650878420656478	0.562	0.832	4.59862436126703e-22	pre-VDZ, non-responders vs responders (responders as reference)
mucosa	scRNAseq	inflammatory monocytes	IGHG3	3.06568157220003e-26	-0.474476949521953	0.196	0.454	1.02816828568445e-21	pre-VDZ, non-responders vs responders (responders as reference)
mucosa	scRNAseq	inflammatory monocytes	HNRNPU	4.76973865951473e-26	-0.373747882061928	0.592	0.853	1.59967495162805e-21	pre-VDZ, non-responders vs responders (responders as reference)
mucosa	scRNAseq	inflammatory monocytes	SOD2	4.96804258378373e-26	-0.567137808468295	0.771	0.949	1.66618212174939e-21	pre-VDZ, non-responders vs responders (responders as reference)
mucosa	scRNAseq	inflammatory monocytes	CD274	5.29902940794314e-26	-0.88706611791202	0.125	0.367	1.77718848283597e-21	pre-VDZ, non-responders vs responders (responders as reference)
mucosa	scRNAseq	inflammatory monocytes	WTAP	8.98805285610142e-26	-0.416999429093275	0.415	0.697	3.0144131668793e-21	pre-VDZ, non-responders vs responders (responders as reference)
mucosa	scRNAseq	inflammatory monocytes	NACA	1.10821159399464e-25	0.663630958394815	0.854	0.879	3.71672004393922e-21	pre-VDZ, non-responders vs responders (responders as reference)
mucosa	scRNAseq	inflammatory monocytes	RPS5	2.42618468285059e-25	0.495376531609017	0.636	0.757	8.13693818934432e-21	pre-VDZ, non-responders vs responders (responders as reference)
mucosa	scRNAseq	inflammatory monocytes	RPL7A	2.87609722395343e-25	0.366419655518689	0.864	0.945	9.64585486969501e-21	pre-VDZ, non-responders vs responders (responders as reference)
mucosa	scRNAseq	inflammatory monocytes	HSPA8	4.19663380193373e-25	-0.291286852920564	0.58	0.832	1.40746704449253e-20	pre-VDZ, non-responders vs responders (responders as reference)
mucosa	scRNAseq	inflammatory monocytes	REL	6.70441706465938e-25	-0.285772565668265	0.607	0.858	2.24852739514546e-20	pre-VDZ, non-responders vs responders (responders as reference)
mucosa	scRNAseq	inflammatory monocytes	NEAT1	7.31951692478976e-25	-0.543435610590853	0.977	0.99	2.45481958623599e-20	pre-VDZ, non-responders vs responders (responders as reference)
mucosa	scRNAseq	inflammatory monocytes	CFLAR	7.81389875684065e-25	-0.509963116802592	0.561	0.824	2.62062536506922e-20	pre-VDZ, non-responders vs responders (responders as reference)
mucosa	scRNAseq	inflammatory monocytes	RPS6KA3	1.50273245105132e-24	-0.396872574560374	0.139	0.383	5.03986409433593e-20	pre-VDZ, non-responders vs responders (responders as reference)
mucosa	scRNAseq	inflammatory monocytes	NFE2L2	1.73882396506063e-24	-0.394201391936614	0.463	0.737	5.83166781402035e-20	pre-VDZ, non-responders vs responders (responders as reference)
mucosa	scRNAseq	inflammatory monocytes	SRSF5	1.86591830330962e-24	0.472624962771773	0.629	0.754	6.25791680563981e-20	pre-VDZ, non-responders vs responders (responders as reference)
mucosa	scRNAseq	inflammatory monocytes	HSP90AA1	3.21236554242095e-24	-0.403293772379924	0.78	0.962	1.07736315561714e-19	pre-VDZ, non-responders vs responders (responders as reference)
mucosa	scRNAseq	inflammatory monocytes	SOCS3	6.95569115023561e-24	-0.497935906367845	0.594	0.845	2.33279969796602e-19	pre-VDZ, non-responders vs responders (responders as reference)
mucosa	scRNAseq	inflammatory monocytes	ACSL4	7.65329074271444e-24	-0.728928698679725	0.219	0.485	2.56676064929157e-19	pre-VDZ, non-responders vs responders (responders as reference)
mucosa	scRNAseq	inflammatory monocytes	ABCA1	8.90738829192416e-24	-0.508216944625986	0.269	0.54	2.98735988534553e-19	pre-VDZ, non-responders vs responders (responders as reference)
mucosa	scRNAseq	inflammatory monocytes	TRA2B	9.3973058097555e-24	-0.262240420016784	0.488	0.744	3.1516684224758e-19	pre-VDZ, non-responders vs responders (responders as reference)
mucosa	scRNAseq	inflammatory monocytes	UBC	1.1023677444247e-23	0.27627746984388	0.813	0.931	3.69712094125155e-19	pre-VDZ, non-responders vs responders (responders as reference)
mucosa	scRNAseq	inflammatory monocytes	MYL12B	1.57685743601045e-23	0.258203096515597	0.587	0.747	5.28846446889184e-19	pre-VDZ, non-responders vs responders (responders as reference)
mucosa	scRNAseq	inflammatory monocytes	REG1A	1.72437385890043e-23	-0.510004152394242	0.076	0.284	5.78320504798026e-19	pre-VDZ, non-responders vs responders (responders as reference)
mucosa	scRNAseq	inflammatory monocytes	RPL15	1.82566221302211e-23	0.303811296874279	0.869	0.954	6.12290593003357e-19	pre-VDZ, non-responders vs responders (responders as reference)
mucosa	scRNAseq	inflammatory monocytes	NFKBIA	1.87218277371519e-23	-0.25101713091988	0.736	0.935	6.27892658648602e-19	pre-VDZ, non-responders vs responders (responders as reference)
mucosa	scRNAseq	inflammatory monocytes	CDC42	2.54203057086114e-23	0.283178392077443	0.647	0.79	8.52546212855409e-19	pre-VDZ, non-responders vs responders (responders as reference)
mucosa	scRNAseq	inflammatory monocytes	IGLC2	3.4503056742535e-23	-0.488147829316897	0.464	0.736	1.15716351703114e-18	pre-VDZ, non-responders vs responders (responders as reference)
mucosa	scRNAseq	inflammatory monocytes	TSPO	3.79214164739777e-23	0.525549234428177	0.569	0.643	1.27180846570426e-18	pre-VDZ, non-responders vs responders (responders as reference)
mucosa	scRNAseq	inflammatory monocytes	HERPUD1	3.82948135045659e-23	-0.327555994055571	0.438	0.705	1.28433145531613e-18	pre-VDZ, non-responders vs responders (responders as reference)
mucosa	scRNAseq	inflammatory monocytes	SLC25A6	4.33582830344368e-23	0.399337755956294	0.497	0.639	1.45415009640894e-18	pre-VDZ, non-responders vs responders (responders as reference)
mucosa	scRNAseq	inflammatory monocytes	SERF2	4.39791137237856e-23	0.374131014577093	0.821	0.905	1.47497151606832e-18	pre-VDZ, non-responders vs responders (responders as reference)
mucosa	scRNAseq	inflammatory monocytes	FYB1	4.69222659085139e-23	-0.487612554838537	0.449	0.719	1.57367895403974e-18	pre-VDZ, non-responders vs responders (responders as reference)
mucosa	scRNAseq	inflammatory monocytes	MTRNR2L8	5.14007791494302e-23	0.30581556516096	0.507	0.636	1.72387933111359e-18	pre-VDZ, non-responders vs responders (responders as reference)
mucosa	scRNAseq	inflammatory monocytes	SFPQ	5.21607012031346e-23	-0.304743379893683	0.547	0.801	1.74936559695073e-18	pre-VDZ, non-responders vs responders (responders as reference)
mucosa	scRNAseq	inflammatory monocytes	RPL8	5.23599084498458e-23	0.620317289094054	0.905	0.936	1.75604660959093e-18	pre-VDZ, non-responders vs responders (responders as reference)
mucosa	scRNAseq	inflammatory monocytes	FCN1	5.74170757475378e-23	0.928279176759956	0.835	0.801	1.92565388642092e-18	pre-VDZ, non-responders vs responders (responders as reference)
mucosa	scRNAseq	inflammatory monocytes	CCL3	6.77786176680835e-23	-0.632260364208994	0.478	0.746	2.27315927935218e-18	pre-VDZ, non-responders vs responders (responders as reference)
mucosa	scRNAseq	inflammatory monocytes	PLSCR1	9.32696084596206e-23	-0.400704020484003	0.456	0.721	3.12807612851875e-18	pre-VDZ, non-responders vs responders (responders as reference)
mucosa	scRNAseq	inflammatory monocytes	EEF1D	1.45726064306336e-22	0.375915679650993	0.656	0.79	4.8873607447059e-18	pre-VDZ, non-responders vs responders (responders as reference)
mucosa	scRNAseq	inflammatory monocytes	IER5	1.46214857194906e-22	-0.399280289910428	0.45	0.718	4.90375388060276e-18	pre-VDZ, non-responders vs responders (responders as reference)
mucosa	scRNAseq	inflammatory monocytes	EIF1B	1.51980837641939e-22	-0.32672999574933	0.342	0.6	5.09713333283533e-18	pre-VDZ, non-responders vs responders (responders as reference)
mucosa	scRNAseq	inflammatory monocytes	FKBP1A	1.56332287861414e-22	0.288664268879204	0.534	0.68	5.24307227029611e-18	pre-VDZ, non-responders vs responders (responders as reference)
mucosa	scRNAseq	inflammatory monocytes	RPL29	2.05673314421323e-22	0.646887475016947	0.917	0.936	6.89787161906233e-18	pre-VDZ, non-responders vs responders (responders as reference)
mucosa	scRNAseq	inflammatory monocytes	LGALS1	3.39668082452887e-22	0.38243328080366	0.741	0.843	1.13917881493049e-17	pre-VDZ, non-responders vs responders (responders as reference)
mucosa	scRNAseq	inflammatory monocytes	ATP1A1	4.16347138375856e-22	-0.286703994206929	0.343	0.602	1.39634503268495e-17	pre-VDZ, non-responders vs responders (responders as reference)
mucosa	scRNAseq	inflammatory monocytes	RPS7	4.17361715518077e-22	0.281749494347634	0.81	0.912	1.39974772150453e-17	pre-VDZ, non-responders vs responders (responders as reference)
mucosa	scRNAseq	inflammatory monocytes	FAM49A	4.20633476349679e-22	-0.472489233495414	0.335	0.604	1.41072055298155e-17	pre-VDZ, non-responders vs responders (responders as reference)
mucosa	scRNAseq	inflammatory monocytes	CFD	4.66930949299691e-22	0.938112736518308	0.499	0.514	1.5659930177613e-17	pre-VDZ, non-responders vs responders (responders as reference)
mucosa	scRNAseq	inflammatory monocytes	KLF6	4.98182157077294e-22	-0.326823454871755	0.657	0.881	1.67080331840583e-17	pre-VDZ, non-responders vs responders (responders as reference)
mucosa	scRNAseq	inflammatory monocytes	IGHA1	5.26425513841512e-22	-0.89173346447076	0.584	0.799	1.76552588832166e-17	pre-VDZ, non-responders vs responders (responders as reference)
mucosa	scRNAseq	inflammatory monocytes	GNAI2	6.40292549044346e-22	0.517429766343187	0.653	0.718	2.14741315098493e-17	pre-VDZ, non-responders vs responders (responders as reference)
mucosa	scRNAseq	inflammatory monocytes	RPL18	6.48962676894209e-22	0.594071827866006	0.926	0.953	2.1764910257678e-17	pre-VDZ, non-responders vs responders (responders as reference)
mucosa	scRNAseq	inflammatory monocytes	HSPH1	6.75480442429324e-22	-0.287719220972096	0.492	0.739	2.26542630781947e-17	pre-VDZ, non-responders vs responders (responders as reference)
mucosa	scRNAseq	inflammatory monocytes	LITAF	7.69965842697821e-22	-0.49633367016451	0.621	0.856	2.58231144323995e-17	pre-VDZ, non-responders vs responders (responders as reference)
mucosa	scRNAseq	inflammatory monocytes	ARPC5	1.00741152463536e-21	0.311781065689487	0.674	0.788	3.37865677132206e-17	pre-VDZ, non-responders vs responders (responders as reference)
mucosa	scRNAseq	inflammatory monocytes	KYNU	1.08213643967185e-21	-0.563056554347319	0.397	0.664	3.62926919137146e-17	pre-VDZ, non-responders vs responders (responders as reference)
mucosa	scRNAseq	inflammatory monocytes	BCL6	1.25368628596173e-21	-0.564174901381686	0.205	0.455	4.20461306585844e-17	pre-VDZ, non-responders vs responders (responders as reference)
mucosa	scRNAseq	inflammatory monocytes	CD83	1.37606914151042e-21	-0.349729580467203	0.59	0.829	4.61506068679765e-17	pre-VDZ, non-responders vs responders (responders as reference)
mucosa	scRNAseq	inflammatory monocytes	HNRNPH1	1.47655455642598e-21	-0.358771361884998	0.46	0.721	4.95206867134147e-17	pre-VDZ, non-responders vs responders (responders as reference)
mucosa	scRNAseq	inflammatory monocytes	KCTD12	2.10673871238074e-21	-0.767941915303873	0.346	0.608	7.06558029358253e-17	pre-VDZ, non-responders vs responders (responders as reference)
mucosa	scRNAseq	inflammatory monocytes	RPS3	2.20909112972557e-21	0.294083517705005	0.84	0.927	7.40884983087362e-17	pre-VDZ, non-responders vs responders (responders as reference)
mucosa	scRNAseq	inflammatory monocytes	DUSP6	2.27039484862708e-21	-0.331897192062739	0.515	0.765	7.61445024332548e-17	pre-VDZ, non-responders vs responders (responders as reference)
mucosa	scRNAseq	inflammatory monocytes	RPL27A	2.47675651957876e-21	0.301322817922378	0.758	0.879	8.30654601536323e-17	pre-VDZ, non-responders vs responders (responders as reference)
mucosa	scRNAseq	inflammatory monocytes	ATP13A3	3.40547338815329e-21	-0.533076157254518	0.544	0.793	1.14212766491885e-16	pre-VDZ, non-responders vs responders (responders as reference)
mucosa	scRNAseq	inflammatory monocytes	PIK3AP1	4.32143475425046e-21	-0.42037200353042	0.299	0.558	1.44932278788052e-16	pre-VDZ, non-responders vs responders (responders as reference)
mucosa	scRNAseq	inflammatory monocytes	EDF1	6.9946685063974e-21	0.264181422197629	0.431	0.587	2.34587192367556e-16	pre-VDZ, non-responders vs responders (responders as reference)
mucosa	scRNAseq	inflammatory monocytes	ARPC2	7.54001605071493e-21	0.254367642349621	0.686	0.835	2.52877058308877e-16	pre-VDZ, non-responders vs responders (responders as reference)
mucosa	scRNAseq	inflammatory monocytes	DUSP1	7.92760630309385e-21	-0.466604784934707	0.777	0.943	2.65876060193161e-16	pre-VDZ, non-responders vs responders (responders as reference)
mucosa	scRNAseq	inflammatory monocytes	CCL4	9.41642180325189e-21	-0.988565296149726	0.342	0.599	3.15807954437462e-16	pre-VDZ, non-responders vs responders (responders as reference)
mucosa	scRNAseq	inflammatory monocytes	VMP1	9.55241651408737e-21	-0.435849693224507	0.642	0.866	3.20368945049462e-16	pre-VDZ, non-responders vs responders (responders as reference)
mucosa	scRNAseq	inflammatory monocytes	RACK1	1.31558552139467e-20	0.324336923148867	0.815	0.907	4.41221072165345e-16	pre-VDZ, non-responders vs responders (responders as reference)
mucosa	scRNAseq	inflammatory monocytes	ACSL1	1.37161457926706e-20	-0.528716174270583	0.342	0.6	4.60012097594587e-16	pre-VDZ, non-responders vs responders (responders as reference)
mucosa	scRNAseq	inflammatory monocytes	COX4I1	1.54107693086463e-20	0.381036144024097	0.701	0.816	5.16846381073381e-16	pre-VDZ, non-responders vs responders (responders as reference)
mucosa	scRNAseq	inflammatory monocytes	GMFG	2.06058238441004e-20	0.538296298282737	0.616	0.672	6.9107812008344e-16	pre-VDZ, non-responders vs responders (responders as reference)
mucosa	scRNAseq	inflammatory monocytes	OLR1	2.06781805980206e-20	-0.666218549717946	0.353	0.612	6.93504820896415e-16	pre-VDZ, non-responders vs responders (responders as reference)
mucosa	scRNAseq	inflammatory monocytes	YBX3	2.32334323411058e-20	-0.317425891663544	0.595	0.824	7.79202853856006e-16	pre-VDZ, non-responders vs responders (responders as reference)
mucosa	scRNAseq	inflammatory monocytes	S100A8	2.42169881544994e-20	0.497910551737576	0.74	0.832	8.12189348725602e-16	pre-VDZ, non-responders vs responders (responders as reference)
mucosa	scRNAseq	inflammatory monocytes	TKT	2.55951716555456e-20	0.548336475010755	0.412	0.504	8.58410866983687e-16	pre-VDZ, non-responders vs responders (responders as reference)
mucosa	scRNAseq	inflammatory monocytes	NR4A2	2.68872630452446e-20	-0.363729408888259	0.59	0.822	9.01745028011414e-16	pre-VDZ, non-responders vs responders (responders as reference)
mucosa	scRNAseq	inflammatory monocytes	RPS14	3.14220918859055e-20	0.475333645604834	0.938	0.966	1.0538341176695e-15	pre-VDZ, non-responders vs responders (responders as reference)
mucosa	scRNAseq	inflammatory monocytes	CD52	4.74411852397688e-20	0.708856510398784	0.566	0.613	1.59108247057137e-15	pre-VDZ, non-responders vs responders (responders as reference)
mucosa	scRNAseq	inflammatory monocytes	CLIC1	4.91704442403028e-20	0.315000224654407	0.526	0.649	1.64907835893128e-15	pre-VDZ, non-responders vs responders (responders as reference)
mucosa	scRNAseq	inflammatory monocytes	RPS28	5.13514570596366e-20	0.406216774728704	0.917	0.956	1.72222516686609e-15	pre-VDZ, non-responders vs responders (responders as reference)
mucosa	scRNAseq	inflammatory monocytes	S100A10	5.40936107567484e-20	0.574572328116862	0.891	0.904	1.81419151755983e-15	pre-VDZ, non-responders vs responders (responders as reference)
mucosa	scRNAseq	inflammatory monocytes	GNB2	6.90141651532022e-20	0.305627478447082	0.444	0.594	2.3145970709081e-15	pre-VDZ, non-responders vs responders (responders as reference)
mucosa	scRNAseq	inflammatory monocytes	EIF4A2	7.11055318321897e-20	-0.279352908492642	0.395	0.638	2.38473732658798e-15	pre-VDZ, non-responders vs responders (responders as reference)
mucosa	scRNAseq	inflammatory monocytes	MALAT1	7.9528796338816e-20	-0.490219529137369	0.999	0.998	2.66723677161121e-15	pre-VDZ, non-responders vs responders (responders as reference)
mucosa	scRNAseq	inflammatory monocytes	TNFAIP8	7.99751348585488e-20	-0.74214724128448	0.387	0.635	2.68220607288601e-15	pre-VDZ, non-responders vs responders (responders as reference)
mucosa	scRNAseq	inflammatory monocytes	ADGRE2	8.58732403477245e-20	-0.513491237674346	0.394	0.649	2.88001673478198e-15	pre-VDZ, non-responders vs responders (responders as reference)
mucosa	scRNAseq	inflammatory monocytes	ICAM1	8.77288641842618e-20	-0.32775449275811	0.485	0.731	2.94225064701177e-15	pre-VDZ, non-responders vs responders (responders as reference)
mucosa	scRNAseq	inflammatory monocytes	FCGR2A	8.83210098509649e-20	-0.283404574315392	0.481	0.719	2.96211002838166e-15	pre-VDZ, non-responders vs responders (responders as reference)
mucosa	scRNAseq	inflammatory monocytes	PFN1	9.41891079592012e-20	0.311642611097832	0.832	0.922	3.15891430273569e-15	pre-VDZ, non-responders vs responders (responders as reference)
mucosa	scRNAseq	inflammatory monocytes	ATF3	1.11360993384678e-19	-0.295884217343549	0.537	0.768	3.73482499613533e-15	pre-VDZ, non-responders vs responders (responders as reference)
mucosa	scRNAseq	inflammatory monocytes	ATP5MC2	2.05782033696868e-19	0.267623593270419	0.504	0.664	6.90151784612556e-15	pre-VDZ, non-responders vs responders (responders as reference)
mucosa	scRNAseq	inflammatory monocytes	HSPA5	2.11706610698225e-19	-0.352409574135123	0.483	0.726	7.10021630959706e-15	pre-VDZ, non-responders vs responders (responders as reference)
mucosa	scRNAseq	inflammatory monocytes	RPL3	2.49872750294381e-19	0.331984927039294	0.831	0.897	8.38023229937294e-15	pre-VDZ, non-responders vs responders (responders as reference)
mucosa	scRNAseq	inflammatory monocytes	RBM47	2.70243197597071e-19	-0.386428409736382	0.36	0.61	9.06341636101057e-15	pre-VDZ, non-responders vs responders (responders as reference)
mucosa	scRNAseq	inflammatory monocytes	LST1	2.93882168758933e-19	0.657409470370857	0.676	0.752	9.8562201758371e-15	pre-VDZ, non-responders vs responders (responders as reference)
mucosa	scRNAseq	inflammatory monocytes	H2AFY	3.08820301239745e-19	0.267784147659543	0.488	0.651	1.03572152629786e-14	pre-VDZ, non-responders vs responders (responders as reference)
mucosa	scRNAseq	inflammatory monocytes	HINT1	3.42712616933159e-19	0.408552085270076	0.507	0.631	1.14938957467043e-14	pre-VDZ, non-responders vs responders (responders as reference)
mucosa	scRNAseq	inflammatory monocytes	ATP6V0B	3.7147480879511e-19	0.271561093191955	0.517	0.669	1.24585221373704e-14	pre-VDZ, non-responders vs responders (responders as reference)
mucosa	scRNAseq	inflammatory monocytes	DICER1	3.82715929528385e-19	-0.423629450464335	0.255	0.494	1.2835526844523e-14	pre-VDZ, non-responders vs responders (responders as reference)
mucosa	scRNAseq	inflammatory monocytes	PTPN2	4.8117777866651e-19	-0.528380718311377	0.336	0.586	1.61377403409174e-14	pre-VDZ, non-responders vs responders (responders as reference)
mucosa	scRNAseq	inflammatory monocytes	PARP14	5.26046232284049e-19	-0.421884652610775	0.467	0.713	1.76425385383424e-14	pre-VDZ, non-responders vs responders (responders as reference)
mucosa	scRNAseq	inflammatory monocytes	SSR4	8.61401114114221e-19	0.287380844179138	0.514	0.67	2.88896705651627e-14	pre-VDZ, non-responders vs responders (responders as reference)
mucosa	scRNAseq	inflammatory monocytes	GPBP1	9.80385604917556e-19	-0.31985785905631	0.408	0.651	3.2880172417725e-14	pre-VDZ, non-responders vs responders (responders as reference)
mucosa	scRNAseq	inflammatory monocytes	IFITM3	1.08971846549615e-18	0.532602570610164	0.609	0.701	3.65469778958098e-14	pre-VDZ, non-responders vs responders (responders as reference)
mucosa	scRNAseq	inflammatory monocytes	BRI3	1.10375835983157e-18	0.343110964368293	0.624	0.724	3.70178478720313e-14	pre-VDZ, non-responders vs responders (responders as reference)
mucosa	scRNAseq	inflammatory monocytes	GLUL	1.15695178213127e-18	-0.355874685701675	0.573	0.799	3.88018488691187e-14	pre-VDZ, non-responders vs responders (responders as reference)
mucosa	scRNAseq	inflammatory monocytes	CALM2	1.39951289864986e-18	0.423137549936753	0.547	0.661	4.69368635949191e-14	pre-VDZ, non-responders vs responders (responders as reference)
mucosa	scRNAseq	inflammatory monocytes	ATP6V0E1	1.47676223461897e-18	0.254663248462452	0.566	0.726	4.95276518246509e-14	pre-VDZ, non-responders vs responders (responders as reference)
mucosa	scRNAseq	inflammatory monocytes	GSTP1	1.49415244493094e-18	0.323179850542716	0.543	0.688	5.01108846980939e-14	pre-VDZ, non-responders vs responders (responders as reference)
mucosa	scRNAseq	inflammatory monocytes	C15orf48	1.8015570487527e-18	-0.576509136959276	0.405	0.651	6.04206203010679e-14	pre-VDZ, non-responders vs responders (responders as reference)
mucosa	scRNAseq	inflammatory monocytes	FCGRT	2.31932097975374e-18	0.311143304851204	0.526	0.679	7.77853870189811e-14	pre-VDZ, non-responders vs responders (responders as reference)
mucosa	scRNAseq	inflammatory monocytes	NFKBIZ	2.68738804021648e-18	-0.326230792583895	0.494	0.726	9.01296200927805e-14	pre-VDZ, non-responders vs responders (responders as reference)
mucosa	scRNAseq	inflammatory monocytes	CD53	2.73565817653442e-18	-0.333460339906657	0.483	0.721	9.17485039246112e-14	pre-VDZ, non-responders vs responders (responders as reference)
mucosa	scRNAseq	inflammatory monocytes	RPS15A	2.82020623395402e-18	0.352520929755755	0.861	0.93	9.45840766743499e-14	pre-VDZ, non-responders vs responders (responders as reference)
mucosa	scRNAseq	inflammatory monocytes	SLC8A1	3.03143785335902e-18	-0.37807220003155	0.267	0.501	1.01668362725955e-13	pre-VDZ, non-responders vs responders (responders as reference)
mucosa	scRNAseq	inflammatory monocytes	COTL1	4.01774862570677e-18	0.274652009011989	0.799	0.909	1.34747253408954e-13	pre-VDZ, non-responders vs responders (responders as reference)
mucosa	scRNAseq	inflammatory monocytes	PSMB3	4.3684156405322e-18	0.340510484645069	0.504	0.648	1.46507923752169e-13	pre-VDZ, non-responders vs responders (responders as reference)
mucosa	scRNAseq	inflammatory monocytes	CD163	5.01032776338294e-18	-0.534146337475228	0.118	0.316	1.68036372528337e-13	pre-VDZ, non-responders vs responders (responders as reference)
mucosa	scRNAseq	inflammatory monocytes	GADD45B	8.15568683068245e-18	-0.302950068248838	0.579	0.794	2.73525424927428e-13	pre-VDZ, non-responders vs responders (responders as reference)
mucosa	scRNAseq	inflammatory monocytes	IGHG4	9.28016587576072e-18	-0.378080802295905	0.054	0.207	3.11238203141263e-13	pre-VDZ, non-responders vs responders (responders as reference)
mucosa	scRNAseq	inflammatory monocytes	MED13	1.01434935688063e-17	-0.481215940258742	0.23	0.458	3.40192487310625e-13	pre-VDZ, non-responders vs responders (responders as reference)
mucosa	scRNAseq	inflammatory monocytes	CAPZB	1.12012653378725e-17	0.409215793824083	0.428	0.54	3.75668036901569e-13	pre-VDZ, non-responders vs responders (responders as reference)
mucosa	scRNAseq	inflammatory monocytes	GK	1.21639622796498e-17	-0.338626076089483	0.497	0.724	4.07954966934896e-13	pre-VDZ, non-responders vs responders (responders as reference)
mucosa	scRNAseq	inflammatory monocytes	GBP1	1.44834159916823e-17	-0.33710027393358	0.441	0.664	4.85744805529041e-13	pre-VDZ, non-responders vs responders (responders as reference)
mucosa	scRNAseq	inflammatory monocytes	IGHGP	1.55026745512829e-17	-0.28444417935549	0.021	0.14	5.19928699100927e-13	pre-VDZ, non-responders vs responders (responders as reference)
mucosa	scRNAseq	inflammatory monocytes	HNRNPF	1.552969758305e-17	-0.274187579257583	0.355	0.584	5.2083499754033e-13	pre-VDZ, non-responders vs responders (responders as reference)
mucosa	scRNAseq	inflammatory monocytes	H2AFZ	1.6471209033807e-17	0.433426527654774	0.459	0.574	5.52411408575818e-13	pre-VDZ, non-responders vs responders (responders as reference)
mucosa	scRNAseq	inflammatory monocytes	BTG1	1.65592668865495e-17	0.373448970238015	0.848	0.907	5.55364692841095e-13	pre-VDZ, non-responders vs responders (responders as reference)
mucosa	scRNAseq	inflammatory monocytes	INTS6	1.75191707349116e-17	-0.547676556215017	0.27	0.502	5.87557948107464e-13	pre-VDZ, non-responders vs responders (responders as reference)
mucosa	scRNAseq	inflammatory monocytes	H3F3A	1.7671191189367e-17	0.275129648406823	0.93	0.974	5.92656410108991e-13	pre-VDZ, non-responders vs responders (responders as reference)
mucosa	scRNAseq	inflammatory monocytes	HNRNPM	2.27266357473709e-17	-0.298909508086581	0.409	0.643	7.62205909695326e-13	pre-VDZ, non-responders vs responders (responders as reference)
mucosa	scRNAseq	inflammatory monocytes	SPAG9	2.47599994229942e-17	0.278603444358834	0.506	0.643	8.30400860648379e-13	pre-VDZ, non-responders vs responders (responders as reference)
mucosa	scRNAseq	inflammatory monocytes	MIR3945HG	3.43787908258875e-17	-0.738551223343836	0.183	0.39	1.15299588671862e-12	pre-VDZ, non-responders vs responders (responders as reference)
mucosa	scRNAseq	inflammatory monocytes	HLA-DQA2	4.0598420026884e-17	-0.3733221047414	0.123	0.3	1.36158981086164e-12	pre-VDZ, non-responders vs responders (responders as reference)
mucosa	scRNAseq	inflammatory monocytes	CREM	4.49672678885084e-17	0.344418342040947	0.528	0.628	1.5081122304448e-12	pre-VDZ, non-responders vs responders (responders as reference)
mucosa	scRNAseq	inflammatory monocytes	MARCKSL1	4.78007924235308e-17	0.2603597146535	0.336	0.449	1.60314297630038e-12	pre-VDZ, non-responders vs responders (responders as reference)
mucosa	scRNAseq	inflammatory monocytes	RASSF4	5.01403960317354e-17	-0.293483694568755	0.219	0.432	1.68160860211234e-12	pre-VDZ, non-responders vs responders (responders as reference)
mucosa	scRNAseq	inflammatory monocytes	RPS19	5.80575607538639e-17	0.494852948129211	0.941	0.969	1.94713447256309e-12	pre-VDZ, non-responders vs responders (responders as reference)
mucosa	scRNAseq	inflammatory monocytes	ITGB2	6.22167830389997e-17	0.359984055555292	0.512	0.643	2.08662646956197e-12	pre-VDZ, non-responders vs responders (responders as reference)
mucosa	scRNAseq	inflammatory monocytes	LRG1	8.03225765571587e-17	-0.39803586092246	0.118	0.305	2.69385857257399e-12	pre-VDZ, non-responders vs responders (responders as reference)
mucosa	scRNAseq	inflammatory monocytes	PNRC1	8.24229563318104e-17	-0.281111942324878	0.718	0.9	2.76430110945626e-12	pre-VDZ, non-responders vs responders (responders as reference)
mucosa	scRNAseq	inflammatory monocytes	ELL2	9.15810846935335e-17	-0.444504827399998	0.382	0.615	3.07144641845173e-12	pre-VDZ, non-responders vs responders (responders as reference)
mucosa	scRNAseq	inflammatory monocytes	TMA7	9.5015879873224e-17	0.270114935875029	0.482	0.617	3.18664257918819e-12	pre-VDZ, non-responders vs responders (responders as reference)
mucosa	scRNAseq	inflammatory monocytes	ATP5MG	9.90333117076378e-17	0.287423563040693	0.61	0.729	3.32137920805076e-12	pre-VDZ, non-responders vs responders (responders as reference)
mucosa	scRNAseq	inflammatory monocytes	SLAMF1	1.00211735529871e-16	-0.556749150482456	0.058	0.214	3.3609011862008e-12	pre-VDZ, non-responders vs responders (responders as reference)
mucosa	scRNAseq	inflammatory monocytes	CD37	1.10427066201157e-16	0.770055979741171	0.51	0.514	3.7035029462544e-12	pre-VDZ, non-responders vs responders (responders as reference)
mucosa	scRNAseq	inflammatory monocytes	METRNL	1.17222605950721e-16	0.342784523392823	0.529	0.638	3.93141175837527e-12	pre-VDZ, non-responders vs responders (responders as reference)
mucosa	scRNAseq	inflammatory monocytes	SLAMF7	1.22452486882129e-16	-0.298009121253467	0.18	0.37	4.10681150505283e-12	pre-VDZ, non-responders vs responders (responders as reference)
mucosa	scRNAseq	inflammatory monocytes	RSRP1	1.2962187999459e-16	-0.257903422737051	0.46	0.685	4.34725861125857e-12	pre-VDZ, non-responders vs responders (responders as reference)
mucosa	scRNAseq	inflammatory monocytes	CD55	1.38553571062783e-16	-0.310921938540359	0.508	0.728	4.64680966630362e-12	pre-VDZ, non-responders vs responders (responders as reference)
mucosa	scRNAseq	inflammatory monocytes	IFITM2	1.4411118224337e-16	0.838846148282595	0.598	0.622	4.83320083007813e-12	pre-VDZ, non-responders vs responders (responders as reference)
mucosa	scRNAseq	inflammatory monocytes	RPL12	1.74660164488916e-16	0.40917374510647	0.906	0.946	5.85775259662928e-12	pre-VDZ, non-responders vs responders (responders as reference)
mucosa	scRNAseq	inflammatory monocytes	EHD1	1.83167254341308e-16	-0.369201133167127	0.383	0.613	6.14306337609879e-12	pre-VDZ, non-responders vs responders (responders as reference)
mucosa	scRNAseq	inflammatory monocytes	RNF144B	2.20870006396943e-16	-0.632250426542886	0.143	0.339	7.40753827454069e-12	pre-VDZ, non-responders vs responders (responders as reference)
mucosa	scRNAseq	inflammatory monocytes	TNFAIP2	2.21030281055699e-16	-0.451825284986176	0.472	0.7	7.41291356604602e-12	pre-VDZ, non-responders vs responders (responders as reference)
mucosa	scRNAseq	inflammatory monocytes	TMEM176A	2.26814326032768e-16	-0.289528048910963	0.216	0.423	7.60689886648696e-12	pre-VDZ, non-responders vs responders (responders as reference)
mucosa	scRNAseq	inflammatory monocytes	RPS15	2.30287967902698e-16	0.338617174759942	0.869	0.945	7.72339786752068e-12	pre-VDZ, non-responders vs responders (responders as reference)
mucosa	scRNAseq	inflammatory monocytes	C9orf72	2.53103854769463e-16	-0.324231851709164	0.31	0.532	8.48859708125825e-12	pre-VDZ, non-responders vs responders (responders as reference)
mucosa	scRNAseq	inflammatory monocytes	DSE	2.70726859684692e-16	-0.378966843919796	0.544	0.763	9.07963742010519e-12	pre-VDZ, non-responders vs responders (responders as reference)
mucosa	scRNAseq	inflammatory monocytes	CHORDC1	2.74614550645681e-16	-0.308334386819394	0.362	0.582	9.21002279955484e-12	pre-VDZ, non-responders vs responders (responders as reference)
mucosa	scRNAseq	inflammatory monocytes	ETV6	3.2782954213743e-16	-0.401710856260926	0.348	0.577	1.09947471842051e-11	pre-VDZ, non-responders vs responders (responders as reference)
mucosa	scRNAseq	inflammatory monocytes	NUMB	3.42865594676905e-16	-0.261686199478156	0.325	0.55	1.1499026314274e-11	pre-VDZ, non-responders vs responders (responders as reference)
mucosa	scRNAseq	inflammatory monocytes	S100A9	3.61509373648146e-16	0.47660119377771	0.89	0.961	1.21243013734115e-11	pre-VDZ, non-responders vs responders (responders as reference)
mucosa	scRNAseq	inflammatory monocytes	MARCKS	3.68553170631324e-16	-0.869476210809642	0.475	0.69	1.23605362366333e-11	pre-VDZ, non-responders vs responders (responders as reference)
mucosa	scRNAseq	inflammatory monocytes	HSP90B1	3.80748567937738e-16	-0.276340138726925	0.519	0.736	1.27695454714959e-11	pre-VDZ, non-responders vs responders (responders as reference)
mucosa	scRNAseq	inflammatory monocytes	LAIR1	4.01854398961739e-16	-0.364657068645545	0.163	0.362	1.34773928323788e-11	pre-VDZ, non-responders vs responders (responders as reference)
mucosa	scRNAseq	inflammatory monocytes	COX7C	4.34574935455413e-16	0.270696722099053	0.501	0.638	1.45747741853036e-11	pre-VDZ, non-responders vs responders (responders as reference)
mucosa	scRNAseq	inflammatory monocytes	RPS16	4.66690852793607e-16	0.300897443351886	0.919	0.969	1.5651877820992e-11	pre-VDZ, non-responders vs responders (responders as reference)
mucosa	scRNAseq	inflammatory monocytes	PCNX1	4.78966421439567e-16	-0.522268017519523	0.259	0.478	1.60635758422402e-11	pre-VDZ, non-responders vs responders (responders as reference)
mucosa	scRNAseq	inflammatory monocytes	MARCH1	4.99618668052208e-16	-0.385379698788849	0.233	0.445	1.67562108891349e-11	pre-VDZ, non-responders vs responders (responders as reference)
mucosa	scRNAseq	inflammatory monocytes	RPS2	5.10962382298851e-16	0.436485618458208	0.971	0.98	1.71366563775389e-11	pre-VDZ, non-responders vs responders (responders as reference)
mucosa	scRNAseq	inflammatory monocytes	PFKFB3	5.1923597591975e-16	-0.492715299410944	0.373	0.602	1.74141361603966e-11	pre-VDZ, non-responders vs responders (responders as reference)
mucosa	scRNAseq	inflammatory monocytes	RGS2	6.02895916959054e-16	-0.442836157289424	0.585	0.794	2.02199232629728e-11	pre-VDZ, non-responders vs responders (responders as reference)
mucosa	scRNAseq	inflammatory monocytes	PSMB9	6.33482860610941e-16	0.562199510946801	0.508	0.571	2.12457481791697e-11	pre-VDZ, non-responders vs responders (responders as reference)
mucosa	scRNAseq	inflammatory monocytes	RPS4X	6.98566909025821e-16	0.40046842205063	0.879	0.93	2.3428536994908e-11	pre-VDZ, non-responders vs responders (responders as reference)
mucosa	scRNAseq	inflammatory monocytes	RPS12	7.22782354579282e-16	0.295515692720256	0.877	0.945	2.42406746078799e-11	pre-VDZ, non-responders vs responders (responders as reference)
mucosa	scRNAseq	inflammatory monocytes	STOM	7.50857079568299e-16	-0.476775749273469	0.131	0.318	2.51822447345616e-11	pre-VDZ, non-responders vs responders (responders as reference)
mucosa	scRNAseq	inflammatory monocytes	CXCL2	1.27393048689238e-15	-0.505868359451136	0.408	0.631	4.27250806693966e-11	pre-VDZ, non-responders vs responders (responders as reference)
mucosa	scRNAseq	inflammatory monocytes	FNDC3B	1.37683316949928e-15	-0.491528132574585	0.369	0.594	4.61762308386669e-11	pre-VDZ, non-responders vs responders (responders as reference)
mucosa	scRNAseq	inflammatory monocytes	PSAP	1.38563371175839e-15	0.269508778775725	0.778	0.889	4.6471383424953e-11	pre-VDZ, non-responders vs responders (responders as reference)
mucosa	scRNAseq	inflammatory monocytes	N4BP2L2	2.22947788447897e-15	-0.321747754258573	0.317	0.535	7.47722292896558e-11	pre-VDZ, non-responders vs responders (responders as reference)
mucosa	scRNAseq	inflammatory monocytes	BACH1	2.23823619143933e-15	-0.390654169541569	0.49	0.71	7.50659653884924e-11	pre-VDZ, non-responders vs responders (responders as reference)
mucosa	scRNAseq	inflammatory monocytes	FLNA	2.28911368280472e-15	0.436912614488796	0.514	0.605	7.67722946939047e-11	pre-VDZ, non-responders vs responders (responders as reference)
mucosa	scRNAseq	inflammatory monocytes	CDV3	2.36379294266306e-15	0.302708456903354	0.379	0.524	7.92768877110335e-11	pre-VDZ, non-responders vs responders (responders as reference)
mucosa	scRNAseq	inflammatory monocytes	NFKB1	2.86712491937085e-15	-0.408992478484675	0.471	0.692	9.61576355458596e-11	pre-VDZ, non-responders vs responders (responders as reference)
mucosa	scRNAseq	inflammatory monocytes	EMP3	2.94691228632815e-15	0.493777705598448	0.711	0.786	9.88335442588736e-11	pre-VDZ, non-responders vs responders (responders as reference)
mucosa	scRNAseq	inflammatory monocytes	RPS8	3.04379104954295e-15	0.368075679785144	0.882	0.94	1.02082664219572e-10	pre-VDZ, non-responders vs responders (responders as reference)
mucosa	scRNAseq	inflammatory monocytes	NECTIN2	3.53207248151479e-15	-0.326694351195703	0.161	0.346	1.18458646885043e-10	pre-VDZ, non-responders vs responders (responders as reference)
mucosa	scRNAseq	inflammatory monocytes	HIF1A	4.02912109424511e-15	-0.566593913981641	0.508	0.718	1.35128663258792e-10	pre-VDZ, non-responders vs responders (responders as reference)
mucosa	scRNAseq	inflammatory monocytes	RPS27	4.42330967464845e-15	0.250723194623659	0.865	0.938	1.4834895986836e-10	pre-VDZ, non-responders vs responders (responders as reference)
mucosa	scRNAseq	inflammatory monocytes	SMG1	4.54494070256479e-15	-0.335840397707948	0.331	0.546	1.52428221282618e-10	pre-VDZ, non-responders vs responders (responders as reference)
mucosa	scRNAseq	inflammatory monocytes	CD47	5.74900602106543e-15	-0.279881443045759	0.24	0.439	1.92810163934492e-10	pre-VDZ, non-responders vs responders (responders as reference)
mucosa	scRNAseq	inflammatory monocytes	SLC1A3	7.17065026966023e-15	-0.41247071094858	0.047	0.183	2.40489268743865e-10	pre-VDZ, non-responders vs responders (responders as reference)
mucosa	scRNAseq	inflammatory monocytes	RPL41	7.26589411359797e-15	0.256861127694512	0.908	0.962	2.43683556781849e-10	pre-VDZ, non-responders vs responders (responders as reference)
mucosa	scRNAseq	inflammatory monocytes	RPL11	7.36437259492748e-15	0.375344803529525	0.938	0.959	2.46986328088678e-10	pre-VDZ, non-responders vs responders (responders as reference)
mucosa	scRNAseq	inflammatory monocytes	YWHAB	7.5363992259938e-15	0.260696788131508	0.551	0.685	2.5275575724138e-10	pre-VDZ, non-responders vs responders (responders as reference)
mucosa	scRNAseq	inflammatory monocytes	SEC11A	8.81663601044118e-15	0.38781947188237	0.424	0.52	2.95692338518176e-10	pre-VDZ, non-responders vs responders (responders as reference)
mucosa	scRNAseq	inflammatory monocytes	TALDO1	9.61031727006415e-15	0.43257461380181	0.486	0.574	3.22310820603411e-10	pre-VDZ, non-responders vs responders (responders as reference)
mucosa	scRNAseq	inflammatory monocytes	PTPN1	1.06832544057253e-14	-0.444346063787159	0.31	0.525	3.58294986259216e-10	pre-VDZ, non-responders vs responders (responders as reference)
mucosa	scRNAseq	inflammatory monocytes	NR4A1	1.20108763641759e-14	-0.275874598267958	0.43	0.641	4.02820771501732e-10	pre-VDZ, non-responders vs responders (responders as reference)
mucosa	scRNAseq	inflammatory monocytes	ANPEP	1.20131872631677e-14	-0.306200558507308	0.278	0.478	4.0289827443212e-10	pre-VDZ, non-responders vs responders (responders as reference)
mucosa	scRNAseq	inflammatory monocytes	ACER3	1.22603307464745e-14	-0.363927308734131	0.142	0.323	4.11186972575262e-10	pre-VDZ, non-responders vs responders (responders as reference)
mucosa	scRNAseq	inflammatory monocytes	FFAR2	1.26826568829241e-14	-0.6122490682832	0.092	0.254	4.25350946539509e-10	pre-VDZ, non-responders vs responders (responders as reference)
mucosa	scRNAseq	inflammatory monocytes	HLA-DRA	1.26979040652248e-14	-0.356629908060667	0.842	0.956	4.25862306539509e-10	pre-VDZ, non-responders vs responders (responders as reference)
mucosa	scRNAseq	inflammatory monocytes	TSPAN14	1.32918301197222e-14	-0.450123505778328	0.132	0.312	4.45781398555242e-10	pre-VDZ, non-responders vs responders (responders as reference)
mucosa	scRNAseq	inflammatory monocytes	APOBEC3A	1.46356675533192e-14	0.923210307364472	0.377	0.215	4.9085101840322e-10	pre-VDZ, non-responders vs responders (responders as reference)
mucosa	scRNAseq	inflammatory monocytes	BRD2	1.4684695529848e-14	-0.327706552451564	0.303	0.514	4.92495318680042e-10	pre-VDZ, non-responders vs responders (responders as reference)
mucosa	scRNAseq	inflammatory monocytes	SLC38A2	1.50571128753481e-14	-0.282100042901675	0.441	0.651	5.04985451613426e-10	pre-VDZ, non-responders vs responders (responders as reference)
mucosa	scRNAseq	inflammatory monocytes	ATP2A2	1.63612886177611e-14	-0.269257209641615	0.244	0.444	5.48724897662473e-10	pre-VDZ, non-responders vs responders (responders as reference)
mucosa	scRNAseq	inflammatory monocytes	TRIM38	1.68676156873287e-14	-0.318940584564385	0.263	0.467	5.65706094921629e-10	pre-VDZ, non-responders vs responders (responders as reference)
mucosa	scRNAseq	inflammatory monocytes	RAP1A	1.79891234168417e-14	-0.254021764206221	0.313	0.52	6.03319221154036e-10	pre-VDZ, non-responders vs responders (responders as reference)
mucosa	scRNAseq	inflammatory monocytes	CIRBP	1.96567693528428e-14	0.338950580630217	0.397	0.515	6.59248730555642e-10	pre-VDZ, non-responders vs responders (responders as reference)
mucosa	scRNAseq	inflammatory monocytes	RNH1	2.01526012949274e-14	0.615023657718798	0.435	0.481	6.75877942229274e-10	pre-VDZ, non-responders vs responders (responders as reference)
mucosa	scRNAseq	inflammatory monocytes	ELOC	2.76360172697872e-14	-0.417696687930009	0.216	0.416	9.26856747194122e-10	pre-VDZ, non-responders vs responders (responders as reference)
mucosa	scRNAseq	inflammatory monocytes	TLR8	2.8461797795677e-14	-0.328566242142837	0.09	0.246	9.54551774471414e-10	pre-VDZ, non-responders vs responders (responders as reference)
mucosa	scRNAseq	inflammatory monocytes	TAGLN2	2.92441828386893e-14	0.255231892427862	0.588	0.716	9.80791404043962e-10	pre-VDZ, non-responders vs responders (responders as reference)
mucosa	scRNAseq	inflammatory monocytes	MTRNR2L12	3.0692617268901e-14	0.373312887997718	0.365	0.437	1.0293689979644e-09	pre-VDZ, non-responders vs responders (responders as reference)
mucosa	scRNAseq	inflammatory monocytes	DDX21	3.12660439664709e-14	-0.267832466135336	0.362	0.569	1.0486005825475e-09	pre-VDZ, non-responders vs responders (responders as reference)
mucosa	scRNAseq	inflammatory monocytes	BCLAF1	3.15817233907185e-14	-0.253539479346423	0.322	0.529	1.05918783907792e-09	pre-VDZ, non-responders vs responders (responders as reference)
mucosa	scRNAseq	inflammatory monocytes	PICALM	3.2329715871176e-14	-0.259862718626643	0.397	0.607	1.0842740108875e-09	pre-VDZ, non-responders vs responders (responders as reference)
mucosa	scRNAseq	inflammatory monocytes	ZFP36L1	3.27158741033855e-14	-0.453186641647684	0.521	0.729	1.09722498567934e-09	pre-VDZ, non-responders vs responders (responders as reference)
mucosa	scRNAseq	inflammatory monocytes	NAMPT	3.80182713351254e-14	-0.347595474115166	0.803	0.941	1.27505678403744e-09	pre-VDZ, non-responders vs responders (responders as reference)
mucosa	scRNAseq	inflammatory monocytes	IFI16	3.85379307488345e-14	-0.317472607944411	0.379	0.589	1.29248512145441e-09	pre-VDZ, non-responders vs responders (responders as reference)
mucosa	scRNAseq	inflammatory monocytes	MTHFD2	4.23229427386871e-14	-0.304575967075022	0.295	0.498	1.41942685357009e-09	pre-VDZ, non-responders vs responders (responders as reference)
mucosa	scRNAseq	inflammatory monocytes	DEFA5	4.23885356697207e-14	-0.382539218120452	0.05	0.183	1.42162670929109e-09	pre-VDZ, non-responders vs responders (responders as reference)
mucosa	scRNAseq	inflammatory monocytes	NFAT5	4.54049911379545e-14	-0.447587212426639	0.35	0.563	1.52279259278472e-09	pre-VDZ, non-responders vs responders (responders as reference)
mucosa	scRNAseq	inflammatory monocytes	ABHD5	5.30857449177479e-14	-0.521924301204213	0.255	0.457	1.78038971305143e-09	pre-VDZ, non-responders vs responders (responders as reference)
mucosa	scRNAseq	inflammatory monocytes	LILRB1	5.49108734346261e-14	-0.444164696915284	0.321	0.532	1.84160087325049e-09	pre-VDZ, non-responders vs responders (responders as reference)
mucosa	scRNAseq	inflammatory monocytes	RPL28	5.76931797538258e-14	0.36952139071956	0.968	0.984	1.93491386258381e-09	pre-VDZ, non-responders vs responders (responders as reference)
mucosa	scRNAseq	inflammatory monocytes	SUSD6	5.94718343328988e-14	-0.324594289711991	0.241	0.439	1.99456637985676e-09	pre-VDZ, non-responders vs responders (responders as reference)
mucosa	scRNAseq	inflammatory monocytes	CCRL2	6.04991348445164e-14	-0.266744635410861	0.275	0.467	2.02901998441539e-09	pre-VDZ, non-responders vs responders (responders as reference)
mucosa	scRNAseq	inflammatory monocytes	EZR	6.34576369662643e-14	0.561134444668204	0.453	0.483	2.12824222857457e-09	pre-VDZ, non-responders vs responders (responders as reference)
mucosa	scRNAseq	inflammatory monocytes	ABL2	7.0269441351907e-14	-0.520427566590895	0.317	0.525	2.35669652406026e-09	pre-VDZ, non-responders vs responders (responders as reference)
mucosa	scRNAseq	inflammatory monocytes	RILPL2	7.59090508702947e-14	0.397940562402178	0.475	0.563	2.54583774808794e-09	pre-VDZ, non-responders vs responders (responders as reference)
mucosa	scRNAseq	inflammatory monocytes	RBM8A	7.76360299487842e-14	0.258488366959025	0.441	0.574	2.60375717242232e-09	pre-VDZ, non-responders vs responders (responders as reference)
mucosa	scRNAseq	inflammatory monocytes	GCA	8.15380842473691e-14	-0.272296829485422	0.304	0.507	2.73462426948826e-09	pre-VDZ, non-responders vs responders (responders as reference)
mucosa	scRNAseq	inflammatory monocytes	RPS26	8.92963311532572e-14	0.28079960477822	0.602	0.685	2.99482035421794e-09	pre-VDZ, non-responders vs responders (responders as reference)
mucosa	scRNAseq	inflammatory monocytes	VIM	9.51243436046578e-14	0.429288943938921	0.959	0.962	3.19028023581301e-09	pre-VDZ, non-responders vs responders (responders as reference)
mucosa	scRNAseq	inflammatory monocytes	C19orf53	9.57722064285552e-14	0.483635928282133	0.303	0.378	3.21200825920089e-09	pre-VDZ, non-responders vs responders (responders as reference)
mucosa	scRNAseq	inflammatory monocytes	MYH9	9.852586166399e-14	0.343057879030143	0.354	0.46	3.3043603484869e-09	pre-VDZ, non-responders vs responders (responders as reference)
mucosa	scRNAseq	inflammatory monocytes	IL1RN	1.03725483725713e-13	-0.745479413543841	0.506	0.7	3.47874527319296e-09	pre-VDZ, non-responders vs responders (responders as reference)
mucosa	scRNAseq	inflammatory monocytes	RUNX1	1.03895936837157e-13	-0.296209514190211	0.376	0.586	3.48446192964457e-09	pre-VDZ, non-responders vs responders (responders as reference)
mucosa	scRNAseq	inflammatory monocytes	TGM2	1.20191536309947e-13	0.43552177155576	0.172	0.245	4.03098374476302e-09	pre-VDZ, non-responders vs responders (responders as reference)
mucosa	scRNAseq	inflammatory monocytes	ARIH1	1.20565597128826e-13	-0.365488597792806	0.358	0.568	4.04352899650655e-09	pre-VDZ, non-responders vs responders (responders as reference)
mucosa	scRNAseq	inflammatory monocytes	PSMD8	1.25668202346755e-13	0.335162620420383	0.271	0.378	4.21466017030548e-09	pre-VDZ, non-responders vs responders (responders as reference)
mucosa	scRNAseq	inflammatory monocytes	FKBP5	1.26302121346109e-13	-0.340065475066963	0.187	0.374	4.23592054570579e-09	pre-VDZ, non-responders vs responders (responders as reference)
mucosa	scRNAseq	inflammatory monocytes	AHNAK	1.34571437790281e-13	0.281972941764637	0.515	0.63	4.51325688061043e-09	pre-VDZ, non-responders vs responders (responders as reference)
mucosa	scRNAseq	inflammatory monocytes	XBP1	1.83691850714707e-13	-0.386958595601769	0.36	0.568	6.16065728926984e-09	pre-VDZ, non-responders vs responders (responders as reference)
mucosa	scRNAseq	inflammatory monocytes	RNASET2	1.91159417186257e-13	0.517187728233102	0.449	0.52	6.41110453359269e-09	pre-VDZ, non-responders vs responders (responders as reference)
mucosa	scRNAseq	inflammatory monocytes	RNF213	2.04223274130718e-13	-0.285825499323008	0.493	0.695	6.84924016779603e-09	pre-VDZ, non-responders vs responders (responders as reference)
mucosa	scRNAseq	inflammatory monocytes	AHR	2.20236681380566e-13	-0.368538155165254	0.326	0.532	7.38629782014143e-09	pre-VDZ, non-responders vs responders (responders as reference)
mucosa	scRNAseq	inflammatory monocytes	CD44	2.54309533056024e-13	-0.260099134803128	0.751	0.904	8.52903311963293e-09	pre-VDZ, non-responders vs responders (responders as reference)
mucosa	scRNAseq	inflammatory monocytes	RPLP1	2.6982936260741e-13	0.291326363160602	0.964	0.995	9.04953716312731e-09	pre-VDZ, non-responders vs responders (responders as reference)
mucosa	scRNAseq	inflammatory monocytes	PELI1	3.0443352696841e-13	-0.46290710146153	0.284	0.485	1.02100916274665e-08	pre-VDZ, non-responders vs responders (responders as reference)
mucosa	scRNAseq	inflammatory monocytes	UBA6	3.22552801601116e-13	-0.258279326642682	0.121	0.276	1.08177758600982e-08	pre-VDZ, non-responders vs responders (responders as reference)
mucosa	scRNAseq	inflammatory monocytes	TAF10	3.470954962356e-13	0.376846316373098	0.321	0.4	1.16408887527495e-08	pre-VDZ, non-responders vs responders (responders as reference)
mucosa	scRNAseq	inflammatory monocytes	BIRC3	4.5721804925925e-13	-0.477004735632572	0.31	0.512	1.53341789360567e-08	pre-VDZ, non-responders vs responders (responders as reference)
mucosa	scRNAseq	inflammatory monocytes	IL7R	4.6365076469008e-13	-1.08863364758158	0.14	0.308	1.55499193461759e-08	pre-VDZ, non-responders vs responders (responders as reference)
mucosa	scRNAseq	inflammatory monocytes	PSMB1	4.94161958502158e-13	0.32848330608621	0.417	0.542	1.65732037642454e-08	pre-VDZ, non-responders vs responders (responders as reference)
mucosa	scRNAseq	inflammatory monocytes	ARHGDIB	5.99262786219934e-13	0.341373342204412	0.57	0.657	2.00980753242442e-08	pre-VDZ, non-responders vs responders (responders as reference)
mucosa	scRNAseq	inflammatory monocytes	PTPN12	6.08313305056714e-13	-0.33294164491392	0.277	0.468	2.04016116249921e-08	pre-VDZ, non-responders vs responders (responders as reference)
mucosa	scRNAseq	inflammatory monocytes	MTPN	6.37336989788661e-13	0.284576459242507	0.423	0.53	2.13750079635321e-08	pre-VDZ, non-responders vs responders (responders as reference)
mucosa	scRNAseq	inflammatory monocytes	KRT8	6.49792046710524e-13	0.37304893388309	0.12	0.184	2.17927256625775e-08	pre-VDZ, non-responders vs responders (responders as reference)
mucosa	scRNAseq	inflammatory monocytes	PPIB	6.89839268886848e-13	0.264048091839443	0.57	0.675	2.31358293999271e-08	pre-VDZ, non-responders vs responders (responders as reference)
mucosa	scRNAseq	inflammatory monocytes	LDLRAD3	6.92860476423154e-13	-0.312637237863256	0.07	0.207	2.32371546582798e-08	pre-VDZ, non-responders vs responders (responders as reference)
mucosa	scRNAseq	inflammatory monocytes	CIB1	8.461890371442e-13	0.309641385539565	0.42	0.533	2.83794879277422e-08	pre-VDZ, non-responders vs responders (responders as reference)
mucosa	scRNAseq	inflammatory monocytes	SNRPD2	8.6013267977101e-13	0.460618745732308	0.362	0.44	2.88471298141601e-08	pre-VDZ, non-responders vs responders (responders as reference)
mucosa	scRNAseq	inflammatory monocytes	CXCL8	1.14591389148966e-12	-0.357183952497368	0.612	0.796	3.84316600927803e-08	pre-VDZ, non-responders vs responders (responders as reference)
mucosa	scRNAseq	inflammatory monocytes	DDX3Y	1.21413489684942e-12	-0.429150376395388	0.36	0.561	4.07196561705358e-08	pre-VDZ, non-responders vs responders (responders as reference)
mucosa	scRNAseq	inflammatory monocytes	AQP9	1.63803499584027e-12	-0.456299609478261	0.371	0.571	5.49364176904909e-08	pre-VDZ, non-responders vs responders (responders as reference)
mucosa	scRNAseq	inflammatory monocytes	PIM1	1.71876257528486e-12	-0.252458048388357	0.266	0.449	5.76438592499036e-08	pre-VDZ, non-responders vs responders (responders as reference)
mucosa	scRNAseq	inflammatory monocytes	XRN1	1.76280728250319e-12	-0.250854661448944	0.263	0.444	5.91210306405919e-08	pre-VDZ, non-responders vs responders (responders as reference)
mucosa	scRNAseq	inflammatory monocytes	CTNNB1	1.96419388196921e-12	-0.267738960091881	0.351	0.545	6.58751344134833e-08	pre-VDZ, non-responders vs responders (responders as reference)
mucosa	scRNAseq	inflammatory monocytes	B4GALT5	1.96834651219731e-12	-0.384944154021575	0.247	0.436	6.60144053260733e-08	pre-VDZ, non-responders vs responders (responders as reference)
mucosa	scRNAseq	inflammatory monocytes	SEC22B	2.1128350314629e-12	-0.259946859157025	0.263	0.445	7.08602612852028e-08	pre-VDZ, non-responders vs responders (responders as reference)
mucosa	scRNAseq	inflammatory monocytes	DRAM1	2.42641718631646e-12	-0.367001773246965	0.147	0.312	8.13771795946813e-08	pre-VDZ, non-responders vs responders (responders as reference)
mucosa	scRNAseq	inflammatory monocytes	BATF	2.59530366047705e-12	-0.431507806298465	0.116	0.269	8.70412941650794e-08	pre-VDZ, non-responders vs responders (responders as reference)
mucosa	scRNAseq	inflammatory monocytes	ADGRE5	2.62636932404831e-12	0.39963464307396	0.394	0.475	8.80831743899322e-08	pre-VDZ, non-responders vs responders (responders as reference)
mucosa	scRNAseq	inflammatory monocytes	COMMD6	2.80169185016695e-12	0.271589087710715	0.419	0.525	9.39631412708993e-08	pre-VDZ, non-responders vs responders (responders as reference)
mucosa	scRNAseq	inflammatory monocytes	CUL1	2.92891476209521e-12	-0.324253076225619	0.185	0.359	9.8229943291149e-08	pre-VDZ, non-responders vs responders (responders as reference)
mucosa	scRNAseq	inflammatory monocytes	SARAF	3.01124446172601e-12	0.367673605668188	0.364	0.465	1.00991116757367e-07	pre-VDZ, non-responders vs responders (responders as reference)
mucosa	scRNAseq	inflammatory monocytes	TLR4	3.67054057112716e-12	-0.337951426802024	0.193	0.367	1.23102589674463e-07	pre-VDZ, non-responders vs responders (responders as reference)
mucosa	scRNAseq	inflammatory monocytes	RNF13	4.18020008005627e-12	-0.269392365604333	0.263	0.449	1.40195550284927e-07	pre-VDZ, non-responders vs responders (responders as reference)
mucosa	scRNAseq	inflammatory monocytes	AGTRAP	4.26387812525086e-12	0.379285986198187	0.252	0.336	1.43001944564663e-07	pre-VDZ, non-responders vs responders (responders as reference)
mucosa	scRNAseq	inflammatory monocytes	EIF3L	5.60245136102278e-12	0.28276185899999	0.335	0.431	1.87895013745982e-07	pre-VDZ, non-responders vs responders (responders as reference)
mucosa	scRNAseq	inflammatory monocytes	IDS	5.94238272089834e-12	0.292015602866418	0.342	0.442	1.99295631693488e-07	pre-VDZ, non-responders vs responders (responders as reference)
mucosa	scRNAseq	inflammatory monocytes	RIN2	6.43668293615251e-12	-0.599318397872365	0.168	0.328	2.15873472312683e-07	pre-VDZ, non-responders vs responders (responders as reference)
mucosa	scRNAseq	inflammatory monocytes	ASH1L	7.58209922126524e-12	-0.255905808245582	0.273	0.455	2.54288443682794e-07	pre-VDZ, non-responders vs responders (responders as reference)
mucosa	scRNAseq	inflammatory monocytes	CUL3	7.64734121922393e-12	-0.279972883966813	0.182	0.351	2.56476529810332e-07	pre-VDZ, non-responders vs responders (responders as reference)
mucosa	scRNAseq	inflammatory monocytes	ATP5PF	8.11534878743243e-12	0.289194610770869	0.358	0.458	2.72172567632909e-07	pre-VDZ, non-responders vs responders (responders as reference)
mucosa	scRNAseq	inflammatory monocytes	CD40	9.57589829928701e-12	-0.353056622382331	0.118	0.271	3.21156477161488e-07	pre-VDZ, non-responders vs responders (responders as reference)
mucosa	scRNAseq	inflammatory monocytes	FTL	1.02785485377927e-11	0.255851221265283	0.992	0.998	3.44721960860492e-07	pre-VDZ, non-responders vs responders (responders as reference)
mucosa	scRNAseq	inflammatory monocytes	NPC2	1.03178264819267e-11	0.311478153654977	0.691	0.791	3.46039264550858e-07	pre-VDZ, non-responders vs responders (responders as reference)
mucosa	scRNAseq	inflammatory monocytes	TFRC	1.09031040276809e-11	-0.451179305910588	0.218	0.393	3.65668302880363e-07	pre-VDZ, non-responders vs responders (responders as reference)
mucosa	scRNAseq	inflammatory monocytes	ITGAX	1.11377242034194e-11	0.271842769500848	0.479	0.592	3.73536994334281e-07	pre-VDZ, non-responders vs responders (responders as reference)
mucosa	scRNAseq	inflammatory monocytes	XAF1	1.15714873375214e-11	-0.50893778926483	0.251	0.434	3.88084542325792e-07	pre-VDZ, non-responders vs responders (responders as reference)
mucosa	scRNAseq	inflammatory monocytes	POU2F2	1.29312918395381e-11	-0.34139650035762	0.241	0.421	4.3368966571443e-07	pre-VDZ, non-responders vs responders (responders as reference)
mucosa	scRNAseq	inflammatory monocytes	TAP1	1.37108787489325e-11	-0.387325399608906	0.322	0.511	4.59835451481699e-07	pre-VDZ, non-responders vs responders (responders as reference)
mucosa	scRNAseq	inflammatory monocytes	PGLS	1.50434424819088e-11	0.435046844533165	0.35	0.424	5.04526973958259e-07	pre-VDZ, non-responders vs responders (responders as reference)
mucosa	scRNAseq	inflammatory monocytes	SLC25A5	1.69600674283339e-11	-0.320249163439876	0.357	0.548	5.68806741411464e-07	pre-VDZ, non-responders vs responders (responders as reference)
mucosa	scRNAseq	inflammatory monocytes	SP3	1.7244272475751e-11	0.321145918066489	0.19	0.276	5.78338410291738e-07	pre-VDZ, non-responders vs responders (responders as reference)
mucosa	scRNAseq	inflammatory monocytes	NCOR2	1.92975537039804e-11	0.257213160230707	0.218	0.307	6.47201356124093e-07	pre-VDZ, non-responders vs responders (responders as reference)
mucosa	scRNAseq	inflammatory monocytes	UXT	2.1722855056491e-11	0.273408905587291	0.332	0.436	7.28541112884595e-07	pre-VDZ, non-responders vs responders (responders as reference)
mucosa	scRNAseq	inflammatory monocytes	RAP2B	2.83689317117071e-11	0.525375425803987	0.27	0.325	9.51437231747231e-07	pre-VDZ, non-responders vs responders (responders as reference)
mucosa	scRNAseq	inflammatory monocytes	FNIP2	3.08908338336059e-11	-0.412488897520917	0.238	0.416	1.03601678511148e-06	pre-VDZ, non-responders vs responders (responders as reference)
mucosa	scRNAseq	inflammatory monocytes	TCERG1	3.23747430375001e-11	-0.261189434385616	0.116	0.259	1.08578413199168e-06	pre-VDZ, non-responders vs responders (responders as reference)
mucosa	scRNAseq	inflammatory monocytes	OLFM4	3.41349624988454e-11	-0.342023681989031	0.091	0.227	1.14481837228628e-06	pre-VDZ, non-responders vs responders (responders as reference)
mucosa	scRNAseq	inflammatory monocytes	WASF2	3.52648382895841e-11	0.270165231632743	0.344	0.45	1.18271214655607e-06	pre-VDZ, non-responders vs responders (responders as reference)
mucosa	scRNAseq	inflammatory monocytes	PYCARD	3.55772129586465e-11	0.556577877710578	0.43	0.46	1.19318856820709e-06	pre-VDZ, non-responders vs responders (responders as reference)
mucosa	scRNAseq	inflammatory monocytes	DNAJC3	4.01926242699203e-11	-0.282773928457986	0.266	0.444	1.34798023276459e-06	pre-VDZ, non-responders vs responders (responders as reference)
mucosa	scRNAseq	inflammatory monocytes	CEBPD	4.28806577943654e-11	0.350042116330502	0.452	0.524	1.43813150110743e-06	pre-VDZ, non-responders vs responders (responders as reference)
mucosa	scRNAseq	inflammatory monocytes	IGSF6	4.46760310248129e-11	0.262815169379896	0.448	0.525	1.49834472851018e-06	pre-VDZ, non-responders vs responders (responders as reference)
mucosa	scRNAseq	inflammatory monocytes	DNAJB11	4.59699494448265e-11	-0.339915302486681	0.186	0.351	1.54174016448059e-06	pre-VDZ, non-responders vs responders (responders as reference)
mucosa	scRNAseq	inflammatory monocytes	CAPNS1	5.86598100866733e-11	0.368596613968861	0.335	0.419	1.96733271068685e-06	pre-VDZ, non-responders vs responders (responders as reference)
mucosa	scRNAseq	inflammatory monocytes	RNF130	6.17689592670788e-11	0.385458683893509	0.38	0.476	2.07160735589929e-06	pre-VDZ, non-responders vs responders (responders as reference)
mucosa	scRNAseq	inflammatory monocytes	IGKC	6.21541762067213e-11	-0.49232796396746	0.814	0.93	2.08452676162102e-06	pre-VDZ, non-responders vs responders (responders as reference)
mucosa	scRNAseq	inflammatory monocytes	SLC2A6	6.32010413990044e-11	-0.254234677879958	0.109	0.246	2.11963652643981e-06	pre-VDZ, non-responders vs responders (responders as reference)
mucosa	scRNAseq	inflammatory monocytes	WDR83OS	6.33451990509834e-11	0.369114349773909	0.3	0.395	2.12447128577188e-06	pre-VDZ, non-responders vs responders (responders as reference)
mucosa	scRNAseq	inflammatory monocytes	GSAP	6.62649818079252e-11	-0.279039617195461	0.19	0.351	2.2223949598742e-06	pre-VDZ, non-responders vs responders (responders as reference)
mucosa	scRNAseq	inflammatory monocytes	OST4	7.07614172649528e-11	0.293022306563033	0.455	0.535	2.37319641223199e-06	pre-VDZ, non-responders vs responders (responders as reference)
mucosa	scRNAseq	inflammatory monocytes	AC005261.1	7.60174930999296e-11	-0.374048197465271	0.081	0.21	2.54947468358544e-06	pre-VDZ, non-responders vs responders (responders as reference)
mucosa	scRNAseq	inflammatory monocytes	AC025580.2	9.10948553362479e-11	-0.327629736948541	0.09	0.222	3.05513925826708e-06	pre-VDZ, non-responders vs responders (responders as reference)
mucosa	scRNAseq	inflammatory monocytes	CTSD	9.59530537791638e-11	-0.295531623713328	0.336	0.509	3.2180735176456e-06	pre-VDZ, non-responders vs responders (responders as reference)
mucosa	scRNAseq	inflammatory monocytes	SLC3A2	1.12289474636585e-10	0.623368071817528	0.36	0.382	3.7659644003618e-06	pre-VDZ, non-responders vs responders (responders as reference)
mucosa	scRNAseq	inflammatory monocytes	SQOR	1.20939419440605e-10	-0.278301759378012	0.18	0.336	4.05606624919901e-06	pre-VDZ, non-responders vs responders (responders as reference)
mucosa	scRNAseq	inflammatory monocytes	HIVEP1	1.38373150243918e-10	-0.285006823002156	0.143	0.287	4.64075871288052e-06	pre-VDZ, non-responders vs responders (responders as reference)
mucosa	scRNAseq	inflammatory monocytes	VEGFA	1.39069572152516e-10	-0.253707476479196	0.419	0.589	4.66411531085108e-06	pre-VDZ, non-responders vs responders (responders as reference)
mucosa	scRNAseq	inflammatory monocytes	RNF19B	1.43143891978501e-10	-0.287077721190561	0.309	0.481	4.80075984917495e-06	pre-VDZ, non-responders vs responders (responders as reference)
mucosa	scRNAseq	inflammatory monocytes	SERPINB9	1.43991939789539e-10	-0.324297177496981	0.577	0.75	4.82920167666155e-06	pre-VDZ, non-responders vs responders (responders as reference)
mucosa	scRNAseq	inflammatory monocytes	YPEL5	1.54625592705307e-10	0.343758467129688	0.488	0.564	5.18583312815059e-06	pre-VDZ, non-responders vs responders (responders as reference)
mucosa	scRNAseq	inflammatory monocytes	GLA	1.57040241600216e-10	-0.428691405407805	0.168	0.325	5.26681562278806e-06	pre-VDZ, non-responders vs responders (responders as reference)
mucosa	scRNAseq	inflammatory monocytes	PPP1R14B	1.72030061669421e-10	0.291153276143511	0.209	0.299	5.76954420826904e-06	pre-VDZ, non-responders vs responders (responders as reference)
mucosa	scRNAseq	inflammatory monocytes	DBNL	1.78875988611824e-10	0.294000456487063	0.277	0.367	5.99914290606334e-06	pre-VDZ, non-responders vs responders (responders as reference)
mucosa	scRNAseq	inflammatory monocytes	JOSD1	1.92918991414066e-10	0.342765528331268	0.335	0.416	6.47011713404496e-06	pre-VDZ, non-responders vs responders (responders as reference)
mucosa	scRNAseq	inflammatory monocytes	RPL22L1	2.09818102580524e-10	-0.272809914707036	0.219	0.383	7.03687952434563e-06	pre-VDZ, non-responders vs responders (responders as reference)
mucosa	scRNAseq	inflammatory monocytes	EREG	2.29796664302233e-10	-0.427136626158012	0.461	0.638	7.70692052736831e-06	pre-VDZ, non-responders vs responders (responders as reference)
mucosa	scRNAseq	inflammatory monocytes	TGOLN2	2.48459850151777e-10	0.3003422233011	0.372	0.454	8.33284645439029e-06	pre-VDZ, non-responders vs responders (responders as reference)
mucosa	scRNAseq	inflammatory monocytes	MAP3K20	2.74670809608991e-10	-0.313464461873899	0.259	0.429	9.21190961266634e-06	pre-VDZ, non-responders vs responders (responders as reference)
mucosa	scRNAseq	inflammatory monocytes	SELENOF	3.00474813961458e-10	-0.278183844193931	0.211	0.372	1.00773243106394e-05	pre-VDZ, non-responders vs responders (responders as reference)
mucosa	scRNAseq	inflammatory monocytes	NEDD8	3.01878991766764e-10	0.314151073029747	0.377	0.458	1.01244176258737e-05	pre-VDZ, non-responders vs responders (responders as reference)
mucosa	scRNAseq	inflammatory monocytes	CSF3R	3.03279342330932e-10	0.276279806500138	0.302	0.392	1.01713825830948e-05	pre-VDZ, non-responders vs responders (responders as reference)
mucosa	scRNAseq	inflammatory monocytes	TNIP1	3.17311320787876e-10	-0.403222967540273	0.263	0.434	1.06419870765838e-05	pre-VDZ, non-responders vs responders (responders as reference)
mucosa	scRNAseq	inflammatory monocytes	APRT	3.99765757641617e-10	0.322932664374004	0.358	0.449	1.34073439797846e-05	pre-VDZ, non-responders vs responders (responders as reference)
mucosa	scRNAseq	inflammatory monocytes	NUDT4	4.85904836651991e-10	-0.26433281047902	0.072	0.186	1.62962764116345e-05	pre-VDZ, non-responders vs responders (responders as reference)
mucosa	scRNAseq	inflammatory monocytes	SRGN	5.23352963294037e-10	-0.256244913844318	0.902	0.976	1.75522116829554e-05	pre-VDZ, non-responders vs responders (responders as reference)
mucosa	scRNAseq	inflammatory monocytes	TBC1D1	5.77586976646683e-10	0.273055458434497	0.138	0.202	1.93711120227765e-05	pre-VDZ, non-responders vs responders (responders as reference)
mucosa	scRNAseq	inflammatory monocytes	AC007952.4	6.27262583439011e-10	0.26783173986207	0.362	0.485	2.10371325233776e-05	pre-VDZ, non-responders vs responders (responders as reference)
mucosa	scRNAseq	inflammatory monocytes	DDX60L	6.33561165688739e-10	-0.295506897742351	0.248	0.413	2.12483743748689e-05	pre-VDZ, non-responders vs responders (responders as reference)
mucosa	scRNAseq	inflammatory monocytes	SLC4A7	7.10528358924008e-10	-0.324701984767123	0.128	0.268	2.38297001015934e-05	pre-VDZ, non-responders vs responders (responders as reference)
mucosa	scRNAseq	inflammatory monocytes	BLVRB	7.45703823527355e-10	0.287356103071349	0.3	0.372	2.50094148334604e-05	pre-VDZ, non-responders vs responders (responders as reference)
mucosa	scRNAseq	inflammatory monocytes	FAM129A	7.90753255963365e-10	-0.309888580620087	0.165	0.315	2.65202826984994e-05	pre-VDZ, non-responders vs responders (responders as reference)
mucosa	scRNAseq	inflammatory monocytes	JPT1	8.34770193794701e-10	0.424365645334078	0.317	0.39	2.79965227594867e-05	pre-VDZ, non-responders vs responders (responders as reference)
mucosa	scRNAseq	inflammatory monocytes	AC083837.1	9.49830467939873e-10	-0.384176146229797	0.047	0.148	3.18554142337675e-05	pre-VDZ, non-responders vs responders (responders as reference)
mucosa	scRNAseq	inflammatory monocytes	MRPL54	1.13863390813001e-09	0.35116084323276	0.179	0.251	3.81875040108643e-05	pre-VDZ, non-responders vs responders (responders as reference)
mucosa	scRNAseq	inflammatory monocytes	RPL10	1.15284510466578e-09	0.279418866970059	0.961	0.992	3.8664119120281e-05	pre-VDZ, non-responders vs responders (responders as reference)
mucosa	scRNAseq	inflammatory monocytes	MX1	1.19969564973992e-09	-0.284356861771999	0.156	0.297	4.02353927009775e-05	pre-VDZ, non-responders vs responders (responders as reference)
mucosa	scRNAseq	inflammatory monocytes	MCTP1	1.22319966336546e-09	-0.266292808422906	0.205	0.361	4.10236703099509e-05	pre-VDZ, non-responders vs responders (responders as reference)
mucosa	scRNAseq	inflammatory monocytes	XIST	1.26777711523102e-09	0.335296232599848	0.158	0.184	4.2518708890618e-05	pre-VDZ, non-responders vs responders (responders as reference)
mucosa	scRNAseq	inflammatory monocytes	ARRDC4	1.3521790369513e-09	-0.287592784693	0.085	0.204	4.53493805412725e-05	pre-VDZ, non-responders vs responders (responders as reference)
mucosa	scRNAseq	inflammatory monocytes	TMEM258	1.38417434818844e-09	0.287641255598247	0.355	0.44	4.6422439289544e-05	pre-VDZ, non-responders vs responders (responders as reference)
mucosa	scRNAseq	inflammatory monocytes	PPIG	1.46399262542416e-09	-0.250393926596865	0.23	0.383	4.90993846714755e-05	pre-VDZ, non-responders vs responders (responders as reference)
mucosa	scRNAseq	inflammatory monocytes	SLC44A1	1.63642658699137e-09	-0.296801615459318	0.234	0.395	5.48824748745165e-05	pre-VDZ, non-responders vs responders (responders as reference)
mucosa	scRNAseq	inflammatory monocytes	PPP1CA	1.68989364288648e-09	0.30907870670569	0.394	0.496	5.66756529951267e-05	pre-VDZ, non-responders vs responders (responders as reference)
mucosa	scRNAseq	inflammatory monocytes	TNS3	1.90653554670086e-09	-0.307260594644679	0.12	0.253	6.39413891652534e-05	pre-VDZ, non-responders vs responders (responders as reference)
mucosa	scRNAseq	inflammatory monocytes	STX4	1.99832084213672e-09	-0.317533867913364	0.23	0.385	6.70196844035814e-05	pre-VDZ, non-responders vs responders (responders as reference)
mucosa	scRNAseq	inflammatory monocytes	PDE7A	2.02913657795816e-09	-0.323662705960152	0.085	0.206	6.80531825515608e-05	pre-VDZ, non-responders vs responders (responders as reference)
mucosa	scRNAseq	inflammatory monocytes	HMGN2	2.03194429933884e-09	0.302806796253247	0.383	0.468	6.81473479112259e-05	pre-VDZ, non-responders vs responders (responders as reference)
mucosa	scRNAseq	inflammatory monocytes	CXCL3	2.71966867733046e-09	-0.550572450772013	0.24	0.398	9.12122481003089e-05	pre-VDZ, non-responders vs responders (responders as reference)
mucosa	scRNAseq	inflammatory monocytes	AC245014.3	2.74141504548463e-09	-0.272239263499928	0.163	0.303	9.19415777954634e-05	pre-VDZ, non-responders vs responders (responders as reference)
mucosa	scRNAseq	inflammatory monocytes	VPS28	2.80839614775926e-09	0.417927695782764	0.342	0.39	9.41879900035501e-05	pre-VDZ, non-responders vs responders (responders as reference)
mucosa	scRNAseq	inflammatory monocytes	N4BP1	3.00840351484664e-09	-0.280430619315856	0.22	0.374	0.000100895837080927	pre-VDZ, non-responders vs responders (responders as reference)
mucosa	scRNAseq	inflammatory monocytes	SEPT9	3.18620828387237e-09	0.303345549294604	0.315	0.396	0.000106859053424512	pre-VDZ, non-responders vs responders (responders as reference)
mucosa	scRNAseq	inflammatory monocytes	CLIC4	3.47057537678505e-09	-0.272800647732372	0.132	0.268	0.000116396156986617	pre-VDZ, non-responders vs responders (responders as reference)
mucosa	scRNAseq	inflammatory monocytes	EPM2AIP1	3.55642972914211e-09	-0.287587845954314	0.129	0.261	0.000119275540255968	pre-VDZ, non-responders vs responders (responders as reference)
mucosa	scRNAseq	inflammatory monocytes	CLEC4E	4.08636189364528e-09	-0.280987775730312	0.274	0.434	0.000137048405189075	pre-VDZ, non-responders vs responders (responders as reference)
mucosa	scRNAseq	inflammatory monocytes	SRGAP2B	4.21248293855422e-09	-0.303673985249465	0.066	0.175	0.000141278252793231	pre-VDZ, non-responders vs responders (responders as reference)
mucosa	scRNAseq	inflammatory monocytes	CD74	4.72397440542023e-09	-0.2667573247776	0.848	0.941	0.000158432653608984	pre-VDZ, non-responders vs responders (responders as reference)
mucosa	scRNAseq	inflammatory monocytes	CTSL	5.14430974501585e-09	-0.667510274158461	0.361	0.52	0.000172529860228342	pre-VDZ, non-responders vs responders (responders as reference)
mucosa	scRNAseq	inflammatory monocytes	LGALS3	5.28839719548718e-09	0.371961315010592	0.532	0.563	0.000177362265142249	pre-VDZ, non-responders vs responders (responders as reference)
mucosa	scRNAseq	inflammatory monocytes	FXR1	5.69516200629246e-09	-0.255633656822168	0.194	0.338	0.000191004343367036	pre-VDZ, non-responders vs responders (responders as reference)
mucosa	scRNAseq	inflammatory monocytes	TRIM25	5.79932543556803e-09	-0.374234563710648	0.264	0.424	0.00019449777645808	pre-VDZ, non-responders vs responders (responders as reference)
mucosa	scRNAseq	inflammatory monocytes	SRC	6.05519064050135e-09	-0.375305150018001	0.146	0.282	0.000203078983701134	pre-VDZ, non-responders vs responders (responders as reference)
mucosa	scRNAseq	inflammatory monocytes	CALM3	6.14670843667572e-09	0.255939758253667	0.325	0.409	0.00020614830754923	pre-VDZ, non-responders vs responders (responders as reference)
mucosa	scRNAseq	inflammatory monocytes	SLC5A3	7.66685531116723e-09	-0.436688472342417	0.175	0.318	0.000257130993425926	pre-VDZ, non-responders vs responders (responders as reference)
mucosa	scRNAseq	inflammatory monocytes	CAMKK2	7.8714590890544e-09	0.434392709167309	0.158	0.191	0.000263992994928706	pre-VDZ, non-responders vs responders (responders as reference)
mucosa	scRNAseq	inflammatory monocytes	FCGR3A	8.21055078358212e-09	0.305413289012376	0.201	0.279	0.000275365452179777	pre-VDZ, non-responders vs responders (responders as reference)
mucosa	scRNAseq	inflammatory monocytes	PSTPIP2	8.26567928727116e-09	-0.380759972824176	0.193	0.338	0.0002772143519365	pre-VDZ, non-responders vs responders (responders as reference)
mucosa	scRNAseq	inflammatory monocytes	ACAA1	9.10097900938281e-09	0.337029257405301	0.216	0.272	0.000305228634016681	pre-VDZ, non-responders vs responders (responders as reference)
mucosa	scRNAseq	inflammatory monocytes	LMNA	9.43537182652488e-09	0.591776829378497	0.357	0.352	0.000316443500317991	pre-VDZ, non-responders vs responders (responders as reference)
mucosa	scRNAseq	inflammatory monocytes	ARID1B	9.96848741020539e-09	-0.254798601282226	0.225	0.374	0.000334323130763468	pre-VDZ, non-responders vs responders (responders as reference)
mucosa	scRNAseq	inflammatory monocytes	CTSC	1.02659591308182e-08	0.339041310662572	0.399	0.458	0.000344299737329381	pre-VDZ, non-responders vs responders (responders as reference)
mucosa	scRNAseq	inflammatory monocytes	TRAF1	1.03780046327354e-08	-0.2543930596928	0.095	0.21	0.00034805751937268	pre-VDZ, non-responders vs responders (responders as reference)
mucosa	scRNAseq	inflammatory monocytes	FPR2	1.1254315732859e-08	-0.337280894199404	0.209	0.357	0.000377447241048624	pre-VDZ, non-responders vs responders (responders as reference)
mucosa	scRNAseq	inflammatory monocytes	FXYD5	1.12942306058549e-08	0.302162799542724	0.328	0.401	0.000378785906059162	pre-VDZ, non-responders vs responders (responders as reference)
mucosa	scRNAseq	inflammatory monocytes	ACOD1	1.16714677960864e-08	-0.523375307041536	0.138	0.269	0.000391437686945145	pre-VDZ, non-responders vs responders (responders as reference)
mucosa	scRNAseq	inflammatory monocytes	ANXA11	1.37756463639856e-08	0.255570942983899	0.315	0.398	0.00046200762775535	pre-VDZ, non-responders vs responders (responders as reference)
mucosa	scRNAseq	inflammatory monocytes	CSF1R	1.61311584744842e-08	0.274130071995269	0.22	0.308	0.000541006792917252	pre-VDZ, non-responders vs responders (responders as reference)
mucosa	scRNAseq	inflammatory monocytes	SNAI1	1.72087701393616e-08	-0.303164053060184	0.179	0.32	0.000577147732933909	pre-VDZ, non-responders vs responders (responders as reference)
mucosa	scRNAseq	inflammatory monocytes	STK17B	1.78054779460561e-08	0.306436247724292	0.41	0.481	0.000597160119354829	pre-VDZ, non-responders vs responders (responders as reference)
mucosa	scRNAseq	inflammatory monocytes	PMAIP1	1.92256622533868e-08	-0.272797982639979	0.313	0.465	0.000644790260654086	pre-VDZ, non-responders vs responders (responders as reference)
mucosa	scRNAseq	inflammatory monocytes	RBBP6	1.99400181752152e-08	-0.251438589449072	0.3	0.45	0.000668748329560366	pre-VDZ, non-responders vs responders (responders as reference)
mucosa	scRNAseq	inflammatory monocytes	PARP9	2.14799243674903e-08	-0.260438810041394	0.2	0.339	0.000720393703436891	pre-VDZ, non-responders vs responders (responders as reference)
mucosa	scRNAseq	inflammatory monocytes	NOP53	2.14839360628277e-08	0.35000416792889	0.315	0.378	0.000720528247675116	pre-VDZ, non-responders vs responders (responders as reference)
mucosa	scRNAseq	inflammatory monocytes	USO1	2.39321600933248e-08	-0.251124793950137	0.094	0.207	0.000802636785209926	pre-VDZ, non-responders vs responders (responders as reference)
mucosa	scRNAseq	inflammatory monocytes	OSBPL8	2.53878114373761e-08	0.334570595047455	0.331	0.401	0.000851456419986719	pre-VDZ, non-responders vs responders (responders as reference)
mucosa	scRNAseq	inflammatory monocytes	RAPGEF2	2.61636018304906e-08	-0.294376534518193	0.131	0.256	0.000877474878190994	pre-VDZ, non-responders vs responders (responders as reference)
mucosa	scRNAseq	inflammatory monocytes	GBP4	2.69796764254627e-08	-0.322118290293729	0.223	0.367	0.000904844387957169	pre-VDZ, non-responders vs responders (responders as reference)
mucosa	scRNAseq	inflammatory monocytes	IL4R	2.79354562916286e-08	-0.271558082831653	0.231	0.377	0.000936899333108639	pre-VDZ, non-responders vs responders (responders as reference)
mucosa	scRNAseq	inflammatory monocytes	CLTB	2.80362038670511e-08	0.318633080518243	0.225	0.289	0.000940278205293158	pre-VDZ, non-responders vs responders (responders as reference)
mucosa	scRNAseq	inflammatory monocytes	AP1S2	3.27722303569545e-08	0.268339388880776	0.404	0.48	0.00109911506171154	pre-VDZ, non-responders vs responders (responders as reference)
mucosa	scRNAseq	inflammatory monocytes	UQCR11	3.77814645453127e-08	0.280945791205725	0.326	0.398	0.0012671147579207	pre-VDZ, non-responders vs responders (responders as reference)
mucosa	scRNAseq	inflammatory monocytes	IFIH1	3.78536063343443e-08	-0.282565635117145	0.161	0.294	0.00126953424924124	pre-VDZ, non-responders vs responders (responders as reference)
mucosa	scRNAseq	inflammatory monocytes	ADAM19	3.79885337438899e-08	-0.378088927068563	0.183	0.321	0.00127405944470258	pre-VDZ, non-responders vs responders (responders as reference)
mucosa	scRNAseq	inflammatory monocytes	TBL1XR1	3.79890663360319e-08	-0.287088352533281	0.185	0.323	0.00127407730677784	pre-VDZ, non-responders vs responders (responders as reference)
mucosa	scRNAseq	inflammatory monocytes	IDH3G	3.80033226262053e-08	0.414730565215577	0.202	0.251	0.00127455543423767	pre-VDZ, non-responders vs responders (responders as reference)
mucosa	scRNAseq	inflammatory monocytes	ARAP2	3.82132804225491e-08	-0.40889522761307	0.218	0.362	0.00128159699881145	pre-VDZ, non-responders vs responders (responders as reference)
mucosa	scRNAseq	inflammatory monocytes	TMEM106A	3.92706215456042e-08	-0.293452876700342	0.083	0.191	0.00131705810539647	pre-VDZ, non-responders vs responders (responders as reference)
mucosa	scRNAseq	inflammatory monocytes	MRC1	4.0438373945615e-08	-0.645795427590073	0.066	0.165	0.00135622218538803	pre-VDZ, non-responders vs responders (responders as reference)
mucosa	scRNAseq	inflammatory monocytes	MZT2B	4.39540005840635e-08	0.36486137643365	0.205	0.256	0.00147412927158832	pre-VDZ, non-responders vs responders (responders as reference)
mucosa	scRNAseq	inflammatory monocytes	CCL3L1	5.07476265614649e-08	-0.366977880481721	0.247	0.392	0.00170197389961841	pre-VDZ, non-responders vs responders (responders as reference)
mucosa	scRNAseq	inflammatory monocytes	PSMC6	5.93483367834072e-08	-0.296264642786509	0.135	0.259	0.00199042451904191	pre-VDZ, non-responders vs responders (responders as reference)
mucosa	scRNAseq	inflammatory monocytes	HIPK2	6.36468348317092e-08	-0.266380670726527	0.204	0.343	0.00213458754658586	pre-VDZ, non-responders vs responders (responders as reference)
mucosa	scRNAseq	inflammatory monocytes	EYA3	6.50660751053834e-08	-0.276090931919386	0.094	0.204	0.00218218602688435	pre-VDZ, non-responders vs responders (responders as reference)
mucosa	scRNAseq	inflammatory monocytes	CORO1A	6.80823285548461e-08	0.299548674069106	0.419	0.506	0.00228334513507243	pre-VDZ, non-responders vs responders (responders as reference)
mucosa	scRNAseq	inflammatory monocytes	KLF13	7.11510482858947e-08	0.438148837782415	0.187	0.228	0.00238626385741234	pre-VDZ, non-responders vs responders (responders as reference)
mucosa	scRNAseq	inflammatory monocytes	ACTB	7.4040665647892e-08	-0.291645741360903	0.961	0.984	0.002483175844499	pre-VDZ, non-responders vs responders (responders as reference)
mucosa	scRNAseq	inflammatory monocytes	MT-CO2	8.3193213948644e-08	0.302202611270967	1	1	0.00279013400940962	pre-VDZ, non-responders vs responders (responders as reference)
mucosa	scRNAseq	inflammatory monocytes	PSMB6	8.88571657566324e-08	0.314982427954696	0.249	0.315	0.00298009162514594	pre-VDZ, non-responders vs responders (responders as reference)
mucosa	scRNAseq	inflammatory monocytes	RABAC1	1.02906159174969e-07	0.317910963458187	0.288	0.341	0.0034512667664101	pre-VDZ, non-responders vs responders (responders as reference)
mucosa	scRNAseq	inflammatory monocytes	ZBTB10	1.08101319389986e-07	-0.350397447967721	0.117	0.233	0.00362550204970135	pre-VDZ, non-responders vs responders (responders as reference)
mucosa	scRNAseq	inflammatory monocytes	STEAP4	1.12419456062214e-07	-0.535489342704476	0.076	0.171	0.00377032371741452	pre-VDZ, non-responders vs responders (responders as reference)
mucosa	scRNAseq	inflammatory monocytes	TNFRSF10D	1.21545959126127e-07	-0.308755261888266	0.169	0.299	0.00407640837717204	pre-VDZ, non-responders vs responders (responders as reference)
mucosa	scRNAseq	inflammatory monocytes	IFI44L	1.67656871905619e-07	-0.342598709687123	0.103	0.214	0.00562287616997065	pre-VDZ, non-responders vs responders (responders as reference)
mucosa	scRNAseq	inflammatory monocytes	GRASP	2.09522395393444e-07	0.475208086702114	0.164	0.183	0.00702696209670533	pre-VDZ, non-responders vs responders (responders as reference)
mucosa	scRNAseq	inflammatory monocytes	CUTA	2.29184170620082e-07	0.324174918603122	0.161	0.212	0.00768637871425633	pre-VDZ, non-responders vs responders (responders as reference)
mucosa	scRNAseq	inflammatory monocytes	KARS	2.50265707865387e-07	-0.286876366047406	0.114	0.227	0.00839341131038935	pre-VDZ, non-responders vs responders (responders as reference)
mucosa	scRNAseq	inflammatory monocytes	NME3	2.66148059336271e-07	0.275664954109661	0.174	0.232	0.00892607361401986	pre-VDZ, non-responders vs responders (responders as reference)
mucosa	scRNAseq	inflammatory monocytes	LFNG	2.71665578791638e-07	0.46207391773599	0.19	0.235	0.00911112018151394	pre-VDZ, non-responders vs responders (responders as reference)
mucosa	scRNAseq	inflammatory monocytes	TRAPPC1	2.97484467177132e-07	0.290714540125154	0.251	0.318	0.00997703406018667	pre-VDZ, non-responders vs responders (responders as reference)
mucosa	scRNAseq	inflammatory monocytes	MFSD10	3.07818158452672e-07	0.376850199291928	0.136	0.181	0.0103236053981857	pre-VDZ, non-responders vs responders (responders as reference)
mucosa	scRNAseq	inflammatory monocytes	SLC9A3R1	3.23872807434653e-07	0.437552406069991	0.128	0.157	0.0108620462157434	pre-VDZ, non-responders vs responders (responders as reference)
mucosa	scRNAseq	inflammatory monocytes	EGR3	3.65408583878028e-07	-0.265773561433626	0.168	0.292	0.0122550730861013	pre-VDZ, non-responders vs responders (responders as reference)
mucosa	scRNAseq	inflammatory monocytes	TIMP2	4.02935988554752e-07	0.446624839616197	0.258	0.282	0.0135136671841493	pre-VDZ, non-responders vs responders (responders as reference)
mucosa	scRNAseq	inflammatory monocytes	ERO1B	4.70734846377336e-07	-0.254305816311162	0.069	0.16	0.0157875052778031	pre-VDZ, non-responders vs responders (responders as reference)
mucosa	scRNAseq	inflammatory monocytes	HSPA6	4.73295710207732e-07	-0.291659327297725	0.167	0.284	0.0158733915289469	pre-VDZ, non-responders vs responders (responders as reference)
mucosa	scRNAseq	inflammatory monocytes	VAMP5	4.75400067421867e-07	0.360712205951613	0.382	0.429	0.0159439674611946	pre-VDZ, non-responders vs responders (responders as reference)
mucosa	scRNAseq	inflammatory monocytes	KCNE1	6.54460396902291e-07	-0.2830480335471	0.051	0.134	0.021949292791309	pre-VDZ, non-responders vs responders (responders as reference)
mucosa	scRNAseq	inflammatory monocytes	UBR4	7.92473506100818e-07	-0.278924111484506	0.139	0.253	0.0265779764476092	pre-VDZ, non-responders vs responders (responders as reference)
mucosa	scRNAseq	inflammatory monocytes	ILK	7.97517063306534e-07	0.253308900704038	0.157	0.206	0.0267471272691745	pre-VDZ, non-responders vs responders (responders as reference)
mucosa	scRNAseq	inflammatory monocytes	PLCG2	8.28983636778956e-07	0.265355491996275	0.329	0.406	0.0278024532102926	pre-VDZ, non-responders vs responders (responders as reference)
mucosa	scRNAseq	inflammatory monocytes	DOK2	9.82591322323149e-07	0.282436930728474	0.292	0.349	0.0329541477680738	pre-VDZ, non-responders vs responders (responders as reference)
mucosa	scRNAseq	inflammatory monocytes	CXCR4	1.060450533054e-06	0.509327534571383	0.295	0.313	0.0355653899775651	pre-VDZ, non-responders vs responders (responders as reference)
mucosa	scRNAseq	inflammatory monocytes	ID2	1.08969531489592e-06	0.417673209679365	0.483	0.519	0.0365462014709793	pre-VDZ, non-responders vs responders (responders as reference)
mucosa	scRNAseq	inflammatory monocytes	SELENOH	1.09757397445845e-06	-0.317663841242373	0.207	0.333	0.0368104359553875	pre-VDZ, non-responders vs responders (responders as reference)
mucosa	scRNAseq	inflammatory monocytes	NRDC	1.3177037343863e-06	0.291853469704525	0.204	0.254	0.0441931478438477	pre-VDZ, non-responders vs responders (responders as reference)
mucosa	scRNAseq	inflammatory monocytes	USP10	1.32158627333696e-06	-0.293765558545778	0.124	0.232	0.0443233604351751	pre-VDZ, non-responders vs responders (responders as reference)
mucosa	scRNAseq	inflammatory monocytes	SPN	1.3831968292221e-06	0.273352447467553	0.09	0.132	0.0463896552584507	pre-VDZ, non-responders vs responders (responders as reference)
PBMCs	scRNAseq	monocytes	HLA-DRB5	6.87420751686053e-166	0.453980216337583	0.502	0.274	2.30547171700468e-161	pre-VDZ, non-responders vs responders (responders as reference)
PBMCs	scRNAseq	monocytes	AHR	1.75725773075681e-149	-0.582635923159329	0.548	0.688	5.8934909774122e-145	pre-VDZ, non-responders vs responders (responders as reference)
PBMCs	scRNAseq	monocytes	IL1R2	1.12625408592234e-146	-0.399537957656391	0.055	0.194	3.77723095336636e-142	pre-VDZ, non-responders vs responders (responders as reference)
PBMCs	scRNAseq	monocytes	MTRNR2L8	2.38975806968069e-146	0.474639780683779	0.428	0.266	8.01477061409511e-142	pre-VDZ, non-responders vs responders (responders as reference)
PBMCs	scRNAseq	monocytes	DUSP6	1.51461790828436e-145	-0.559328501975916	0.686	0.835	5.07972554080409e-141	pre-VDZ, non-responders vs responders (responders as reference)
PBMCs	scRNAseq	monocytes	HSPH1	6.0196276315529e-136	-0.757115863220765	0.2	0.366	2.01886271507021e-131	pre-VDZ, non-responders vs responders (responders as reference)
PBMCs	scRNAseq	monocytes	LHFPL2	9.75617868942277e-130	-0.521434036802073	0.375	0.545	3.27202720885861e-125	pre-VDZ, non-responders vs responders (responders as reference)
PBMCs	scRNAseq	monocytes	ASPH	4.59887704112204e-121	-0.412380855279406	0.214	0.381	1.54237138205151e-116	pre-VDZ, non-responders vs responders (responders as reference)
PBMCs	scRNAseq	monocytes	NR4A3	1.68925423576662e-116	0.412382620016313	0.42	0.246	5.66542085591411e-112	pre-VDZ, non-responders vs responders (responders as reference)
PBMCs	scRNAseq	monocytes	FKBP5	1.04466782471383e-114	-0.447924132538497	0.218	0.358	3.50360695052523e-110	pre-VDZ, non-responders vs responders (responders as reference)
PBMCs	scRNAseq	monocytes	ANKRD28	2.60931294385505e-109	-0.439492818796385	0.439	0.599	8.75111375110105e-105	pre-VDZ, non-responders vs responders (responders as reference)
PBMCs	scRNAseq	monocytes	ZEB2	3.42152380130773e-105	-0.439257324962435	0.947	0.969	1.14751065248258e-100	pre-VDZ, non-responders vs responders (responders as reference)
PBMCs	scRNAseq	monocytes	KIAA1551	6.16704924104505e-101	-0.42880413639485	0.337	0.488	2.06830497446169e-96	pre-VDZ, non-responders vs responders (responders as reference)
PBMCs	scRNAseq	monocytes	MTSS1	8.66957126661644e-100	-0.369552469881672	0.359	0.53	2.90760081139782e-95	pre-VDZ, non-responders vs responders (responders as reference)
PBMCs	scRNAseq	monocytes	ZFP36L1	1.2340213245814e-90	-0.539030218926639	0.758	0.838	4.13866071838109e-86	pre-VDZ, non-responders vs responders (responders as reference)
PBMCs	scRNAseq	monocytes	CDC42EP3	5.33316127810587e-87	-0.4157832509614	0.513	0.645	1.78863562945115e-82	pre-VDZ, non-responders vs responders (responders as reference)
PBMCs	scRNAseq	monocytes	RPS18	1.11688608915614e-85	-0.486271419048591	0.911	0.94	3.74581256581187e-81	pre-VDZ, non-responders vs responders (responders as reference)
PBMCs	scRNAseq	monocytes	HMGB2	9.62748413455087e-85	-0.364960584224802	0.442	0.578	3.22886562904567e-80	pre-VDZ, non-responders vs responders (responders as reference)
PBMCs	scRNAseq	monocytes	MDM2	3.10559738790092e-84	-0.32978144123558	0.289	0.429	1.04155525195421e-79	pre-VDZ, non-responders vs responders (responders as reference)
PBMCs	scRNAseq	monocytes	ANXA1	7.12509480749673e-83	-0.463569029888117	0.913	0.946	2.38961429653825e-78	pre-VDZ, non-responders vs responders (responders as reference)
PBMCs	scRNAseq	monocytes	AC245128.3	1.98325424951154e-80	-0.419539630235872	0.579	0.661	6.65143810201182e-76	pre-VDZ, non-responders vs responders (responders as reference)
PBMCs	scRNAseq	monocytes	UBE2D1	2.0828926665349e-80	-0.329876940576692	0.444	0.585	6.98560542502475e-76	pre-VDZ, non-responders vs responders (responders as reference)
PBMCs	scRNAseq	monocytes	GBP5	2.83728129539156e-80	0.496532676929874	0.231	0.136	9.51567400848421e-76	pre-VDZ, non-responders vs responders (responders as reference)
PBMCs	scRNAseq	monocytes	SERPINB2	1.40671607506274e-79	-0.503777578286725	0.117	0.238	4.7178443725454e-75	pre-VDZ, non-responders vs responders (responders as reference)
PBMCs	scRNAseq	monocytes	HSPA1A	2.69261117290207e-79	-0.9260114701589	0.22	0.355	9.03047935167895e-75	pre-VDZ, non-responders vs responders (responders as reference)
PBMCs	scRNAseq	monocytes	LAP3	2.6048322722891e-78	0.332637791488138	0.376	0.323	8.7360864748032e-74	pre-VDZ, non-responders vs responders (responders as reference)
PBMCs	scRNAseq	monocytes	MT-CO3	5.3157078228812e-76	-0.269887337234417	0.999	0.999	1.7827820896379e-71	pre-VDZ, non-responders vs responders (responders as reference)
PBMCs	scRNAseq	monocytes	RAB11FIP1	1.7141585081575e-75	-0.371509561848995	0.763	0.828	5.74894480465864e-71	pre-VDZ, non-responders vs responders (responders as reference)
PBMCs	scRNAseq	monocytes	MAFB	1.07329801206882e-74	-0.413291829328651	0.828	0.895	3.59962687287642e-70	pre-VDZ, non-responders vs responders (responders as reference)
PBMCs	scRNAseq	monocytes	WARS	3.4983783342633e-72	0.506726480207112	0.527	0.481	1.17328612574523e-67	pre-VDZ, non-responders vs responders (responders as reference)
PBMCs	scRNAseq	monocytes	LUCAT1	3.53659921767254e-71	-0.339421866306165	0.433	0.544	1.18610464562302e-66	pre-VDZ, non-responders vs responders (responders as reference)
PBMCs	scRNAseq	monocytes	TLR2	2.06464581206214e-70	-0.304790605082263	0.441	0.564	6.924409124494e-66	pre-VDZ, non-responders vs responders (responders as reference)
PBMCs	scRNAseq	monocytes	CREM	1.00800603387053e-68	0.38547239165199	0.447	0.309	3.38065063639499e-64	pre-VDZ, non-responders vs responders (responders as reference)
PBMCs	scRNAseq	monocytes	RPL37	5.26382993453788e-68	-0.376374894687909	0.898	0.929	1.76538328344531e-63	pre-VDZ, non-responders vs responders (responders as reference)
PBMCs	scRNAseq	monocytes	HSP90AA1	2.91084521425331e-67	-0.858241002314115	0.825	0.88	9.76239267956274e-63	pre-VDZ, non-responders vs responders (responders as reference)
PBMCs	scRNAseq	monocytes	EMP1	1.40724794572075e-66	-0.472085997964551	0.486	0.585	4.71962816035824e-62	pre-VDZ, non-responders vs responders (responders as reference)
PBMCs	scRNAseq	monocytes	CREBRF	5.04488421440865e-66	-0.314632875449461	0.442	0.57	1.69195326782837e-61	pre-VDZ, non-responders vs responders (responders as reference)
PBMCs	scRNAseq	monocytes	ROCK1	9.1391484223896e-66	-0.3107344195174	0.649	0.736	3.06508759790102e-61	pre-VDZ, non-responders vs responders (responders as reference)
PBMCs	scRNAseq	monocytes	OLIG1	1.9440931948991e-65	-0.221994087828174	0.094	0.19	6.52009975705259e-61	pre-VDZ, non-responders vs responders (responders as reference)
PBMCs	scRNAseq	monocytes	RPL37A	4.18676043088235e-65	-0.383456971120523	0.861	0.901	1.40415571330932e-60	pre-VDZ, non-responders vs responders (responders as reference)
PBMCs	scRNAseq	monocytes	TNFAIP8	5.01060709437879e-64	-0.410986421213919	0.277	0.387	1.68045740731276e-59	pre-VDZ, non-responders vs responders (responders as reference)
PBMCs	scRNAseq	monocytes	RPLP1	3.55418679501536e-63	-0.340663034302823	0.961	0.977	1.19200316731225e-58	pre-VDZ, non-responders vs responders (responders as reference)
PBMCs	scRNAseq	monocytes	SGK3	1.1973771557411e-62	-0.270367262758058	0.271	0.387	4.01576350492449e-58	pre-VDZ, non-responders vs responders (responders as reference)
PBMCs	scRNAseq	monocytes	RPL23	1.34284328887939e-62	-0.378136906460511	0.882	0.912	4.5036278222437e-58	pre-VDZ, non-responders vs responders (responders as reference)
PBMCs	scRNAseq	monocytes	PTAFR	2.1481785645856e-62	-0.283426399567398	0.372	0.497	7.20456126990718e-58	pre-VDZ, non-responders vs responders (responders as reference)
PBMCs	scRNAseq	monocytes	S100A6	2.16255920364077e-62	-0.310124095860838	0.95	0.968	7.2527910571704e-58	pre-VDZ, non-responders vs responders (responders as reference)
PBMCs	scRNAseq	monocytes	MT-CO2	5.23329505602443e-62	-0.240960806995749	0.999	0.998	1.75514249588947e-57	pre-VDZ, non-responders vs responders (responders as reference)
PBMCs	scRNAseq	monocytes	ATP6V1B2	5.6540408334362e-62	-0.274141241399115	0.5	0.617	1.89625221471783e-57	pre-VDZ, non-responders vs responders (responders as reference)
PBMCs	scRNAseq	monocytes	RB1CC1	3.91550237214102e-61	-0.329876989171808	0.56	0.658	1.31318118556866e-56	pre-VDZ, non-responders vs responders (responders as reference)
PBMCs	scRNAseq	monocytes	AC020656.1	1.11930804586697e-60	-0.127363408431067	0.541	0.675	3.75393532422864e-56	pre-VDZ, non-responders vs responders (responders as reference)
PBMCs	scRNAseq	monocytes	MAML2	1.98266568440403e-59	-0.206306781937488	0.186	0.298	6.64946417235424e-55	pre-VDZ, non-responders vs responders (responders as reference)
PBMCs	scRNAseq	monocytes	NLRP12	2.25550696891883e-59	-0.192109029848281	0.149	0.249	7.56451927235996e-55	pre-VDZ, non-responders vs responders (responders as reference)
PBMCs	scRNAseq	monocytes	MBNL1	9.31997871298418e-59	-0.309834691405338	0.83	0.876	3.12573446076064e-54	pre-VDZ, non-responders vs responders (responders as reference)
PBMCs	scRNAseq	monocytes	HIPK3	1.61494054033411e-58	-0.259324477511814	0.448	0.544	5.41618758417253e-54	pre-VDZ, non-responders vs responders (responders as reference)
PBMCs	scRNAseq	monocytes	NFKBIA	2.41779090104892e-58	-0.465184828572453	0.867	0.915	8.10878712393788e-54	pre-VDZ, non-responders vs responders (responders as reference)
PBMCs	scRNAseq	monocytes	CD163	2.70695031743603e-58	-0.268898588688035	0.233	0.341	9.07856997461695e-54	pre-VDZ, non-responders vs responders (responders as reference)
PBMCs	scRNAseq	monocytes	VIM	3.4556060585374e-58	-0.347529913574314	0.985	0.993	1.15894115991227e-53	pre-VDZ, non-responders vs responders (responders as reference)
PBMCs	scRNAseq	monocytes	RPL10	1.02486156952793e-57	-0.368570430995232	0.943	0.966	3.43718073188277e-53	pre-VDZ, non-responders vs responders (responders as reference)
PBMCs	scRNAseq	monocytes	RPL36	1.25012196153673e-57	-0.338416317255049	0.835	0.878	4.19265903460188e-53	pre-VDZ, non-responders vs responders (responders as reference)
PBMCs	scRNAseq	monocytes	GBP1	1.45169942650323e-57	0.450316655856553	0.287	0.231	4.86870953660654e-53	pre-VDZ, non-responders vs responders (responders as reference)
PBMCs	scRNAseq	monocytes	HIPK1	1.69674137434699e-57	-0.294614199859678	0.461	0.553	5.69053122128492e-53	pre-VDZ, non-responders vs responders (responders as reference)
PBMCs	scRNAseq	monocytes	SQSTM1	2.58495237640304e-57	-0.338390503350693	0.56	0.662	8.6694132799805e-53	pre-VDZ, non-responders vs responders (responders as reference)
PBMCs	scRNAseq	monocytes	PLAC8	2.78597801388456e-57	0.270840087321768	0.35	0.377	9.34361306296602e-53	pre-VDZ, non-responders vs responders (responders as reference)
PBMCs	scRNAseq	monocytes	RPL35A	3.32593772341478e-57	-0.338721413001754	0.888	0.92	1.11545299367885e-52	pre-VDZ, non-responders vs responders (responders as reference)
PBMCs	scRNAseq	monocytes	TMEM176B	4.87274417277395e-57	0.274839508977935	0.549	0.423	1.63422094066493e-52	pre-VDZ, non-responders vs responders (responders as reference)
PBMCs	scRNAseq	monocytes	DNAJB1	6.27351469849792e-57	-0.427824681418845	0.232	0.347	2.10401135958223e-52	pre-VDZ, non-responders vs responders (responders as reference)
PBMCs	scRNAseq	monocytes	BACH1	2.35890935942584e-56	-0.296673059103598	0.708	0.775	7.91131020964239e-52	pre-VDZ, non-responders vs responders (responders as reference)
PBMCs	scRNAseq	monocytes	HSP90AB1	2.14440822802429e-55	-0.480169706055026	0.681	0.736	7.19191631514786e-51	pre-VDZ, non-responders vs responders (responders as reference)
PBMCs	scRNAseq	monocytes	RPS23	2.49517076018697e-55	-0.354274474976757	0.913	0.936	8.36830369551507e-51	pre-VDZ, non-responders vs responders (responders as reference)
PBMCs	scRNAseq	monocytes	NBPF19	2.53112277682531e-55	-0.272570114754195	0.322	0.419	8.48887956891673e-51	pre-VDZ, non-responders vs responders (responders as reference)
PBMCs	scRNAseq	monocytes	AHNAK	9.43321371613508e-55	-0.353356629923511	0.9	0.93	3.16371121611738e-50	pre-VDZ, non-responders vs responders (responders as reference)
PBMCs	scRNAseq	monocytes	STIP1	1.25713984993676e-54	-0.173412891433372	0.114	0.201	4.21619562871792e-50	pre-VDZ, non-responders vs responders (responders as reference)
PBMCs	scRNAseq	monocytes	NR4A1	3.9599464738979e-53	0.267150575170237	0.391	0.276	1.32808684841588e-48	pre-VDZ, non-responders vs responders (responders as reference)
PBMCs	scRNAseq	monocytes	RPL13	7.36458034068714e-53	-0.35419498539624	0.94	0.96	2.46993295465965e-48	pre-VDZ, non-responders vs responders (responders as reference)
PBMCs	scRNAseq	monocytes	KLF6	1.8373423245506e-52	-0.422205719777832	0.844	0.884	6.1620786880778e-48	pre-VDZ, non-responders vs responders (responders as reference)
PBMCs	scRNAseq	monocytes	HSPA8	3.19581810827657e-52	-0.364547490918073	0.568	0.637	1.0718134771538e-47	pre-VDZ, non-responders vs responders (responders as reference)
PBMCs	scRNAseq	monocytes	RPS8	5.31960706384307e-52	-0.340301162605296	0.913	0.944	1.78408981707169e-47	pre-VDZ, non-responders vs responders (responders as reference)
PBMCs	scRNAseq	monocytes	CELF1	7.50426704917296e-52	-0.243189102837379	0.495	0.594	2.51678108295163e-47	pre-VDZ, non-responders vs responders (responders as reference)
PBMCs	scRNAseq	monocytes	S100A10	1.4460686575233e-51	-0.311821882157672	0.936	0.957	4.84982506360166e-47	pre-VDZ, non-responders vs responders (responders as reference)
PBMCs	scRNAseq	monocytes	RPL39	1.80877135020646e-51	-0.300755904704331	0.941	0.961	6.06625735432241e-47	pre-VDZ, non-responders vs responders (responders as reference)
PBMCs	scRNAseq	monocytes	RPL22	1.904835462221e-51	-0.302960787790612	0.851	0.891	6.3884371731968e-47	pre-VDZ, non-responders vs responders (responders as reference)
PBMCs	scRNAseq	monocytes	UBE2R2	3.21809495689914e-51	-0.257426272745035	0.564	0.658	1.07928468664483e-46	pre-VDZ, non-responders vs responders (responders as reference)
PBMCs	scRNAseq	monocytes	RNF213	4.12202504087665e-51	0.261366925264197	0.624	0.627	1.38244475820921e-46	pre-VDZ, non-responders vs responders (responders as reference)
PBMCs	scRNAseq	monocytes	RPL6	4.15238570739191e-51	-0.311740686721536	0.899	0.932	1.3926271185451e-46	pre-VDZ, non-responders vs responders (responders as reference)
PBMCs	scRNAseq	monocytes	FAM107B	4.61652289250015e-51	-0.337053639557884	0.752	0.806	1.5482894476867e-46	pre-VDZ, non-responders vs responders (responders as reference)
PBMCs	scRNAseq	monocytes	RPS4X	6.1608734785411e-51	-0.327411904447196	0.913	0.94	2.06623374723312e-46	pre-VDZ, non-responders vs responders (responders as reference)
PBMCs	scRNAseq	monocytes	SPTLC2	6.22505128732981e-51	-0.198712430097517	0.259	0.37	2.08775770074467e-46	pre-VDZ, non-responders vs responders (responders as reference)
PBMCs	scRNAseq	monocytes	FCGR1A	1.25549875636116e-50	0.201525927252996	0.255	0.215	4.21069172908405e-46	pre-VDZ, non-responders vs responders (responders as reference)
PBMCs	scRNAseq	monocytes	ITGA5	1.31015849935478e-50	-0.278069689535144	0.593	0.685	4.39400957513606e-46	pre-VDZ, non-responders vs responders (responders as reference)
PBMCs	scRNAseq	monocytes	ZBTB43	1.86163255116388e-50	-0.297418070399845	0.586	0.671	6.24354325009342e-46	pre-VDZ, non-responders vs responders (responders as reference)
PBMCs	scRNAseq	monocytes	RPS28	1.9949965337596e-50	-0.305534063615605	0.933	0.955	6.69081937492294e-46	pre-VDZ, non-responders vs responders (responders as reference)
PBMCs	scRNAseq	monocytes	SLC16A6	2.99935740526363e-50	-0.324046776832937	0.387	0.487	1.00592448657732e-45	pre-VDZ, non-responders vs responders (responders as reference)
PBMCs	scRNAseq	monocytes	MYO1F	1.67321023274744e-49	-0.248833926569745	0.616	0.718	5.61161247858836e-45	pre-VDZ, non-responders vs responders (responders as reference)
PBMCs	scRNAseq	monocytes	FGL2	3.0071404680246e-49	0.281723719735774	0.682	0.675	1.00853477016609e-44	pre-VDZ, non-responders vs responders (responders as reference)
PBMCs	scRNAseq	monocytes	IFNGR1	6.88076236216175e-49	-0.248856161487527	0.605	0.68	2.30767008102181e-44	pre-VDZ, non-responders vs responders (responders as reference)
PBMCs	scRNAseq	monocytes	ZNF217	7.53177535405969e-49	-0.248691381959777	0.384	0.487	2.52600681824454e-44	pre-VDZ, non-responders vs responders (responders as reference)
PBMCs	scRNAseq	monocytes	DNAJB6	2.32065134291484e-48	-0.285604291304757	0.681	0.731	7.78300047386779e-44	pre-VDZ, non-responders vs responders (responders as reference)
PBMCs	scRNAseq	monocytes	CCDC88A	2.36182032902856e-48	-0.278211161898481	0.509	0.604	7.92107301949598e-44	pre-VDZ, non-responders vs responders (responders as reference)
PBMCs	scRNAseq	monocytes	GBP4	2.6572880932429e-48	0.248340315291914	0.19	0.128	8.91201280711803e-44	pre-VDZ, non-responders vs responders (responders as reference)
PBMCs	scRNAseq	monocytes	PLCG2	3.38454131572697e-48	-0.273758732915464	0.296	0.409	1.13510746646851e-43	pre-VDZ, non-responders vs responders (responders as reference)
PBMCs	scRNAseq	monocytes	HSPA6	3.92118322331366e-48	-0.305492186547288	0.101	0.182	1.31508642943493e-43	pre-VDZ, non-responders vs responders (responders as reference)
PBMCs	scRNAseq	monocytes	STAT1	4.6521420653251e-48	0.24926819645306	0.408	0.385	1.56023540586873e-43	pre-VDZ, non-responders vs responders (responders as reference)
PBMCs	scRNAseq	monocytes	THBS1	5.09033084848065e-48	-0.617039169893145	0.246	0.329	1.70719515996344e-43	pre-VDZ, non-responders vs responders (responders as reference)
PBMCs	scRNAseq	monocytes	ZNF331	1.14534281618847e-47	0.295588939925207	0.232	0.143	3.84125073693288e-43	pre-VDZ, non-responders vs responders (responders as reference)
PBMCs	scRNAseq	monocytes	CXCL8	1.16441414918879e-47	-0.854074701924002	0.47	0.544	3.90521217354938e-43	pre-VDZ, non-responders vs responders (responders as reference)
PBMCs	scRNAseq	monocytes	SQLE	2.46111828519184e-47	-0.250898594545215	0.218	0.317	8.2540985048764e-43	pre-VDZ, non-responders vs responders (responders as reference)
PBMCs	scRNAseq	monocytes	CCDC117	3.72837642956433e-47	-0.133023509372432	0.077	0.152	1.25042288694728e-42	pre-VDZ, non-responders vs responders (responders as reference)
PBMCs	scRNAseq	monocytes	LRRC8C	4.01663569578744e-47	-0.266014125902375	0.342	0.431	1.34709927965319e-42	pre-VDZ, non-responders vs responders (responders as reference)
PBMCs	scRNAseq	monocytes	TXNIP	5.1491901379806e-47	-0.357929763042344	0.673	0.738	1.72693538847593e-42	pre-VDZ, non-responders vs responders (responders as reference)
PBMCs	scRNAseq	monocytes	RPLP2	5.24875177198343e-47	-0.291238904463412	0.921	0.949	1.7603263692878e-42	pre-VDZ, non-responders vs responders (responders as reference)
PBMCs	scRNAseq	monocytes	KLF9	1.51831579168593e-46	-0.169347123925993	0.139	0.231	5.09212750215627e-42	pre-VDZ, non-responders vs responders (responders as reference)
PBMCs	scRNAseq	monocytes	RPL31	1.7987510938356e-46	-0.309811858522993	0.693	0.767	6.03265141850585e-42	pre-VDZ, non-responders vs responders (responders as reference)
PBMCs	scRNAseq	monocytes	CYP1B1	1.82556724966755e-46	-0.537129848480201	0.459	0.528	6.12258744193502e-42	pre-VDZ, non-responders vs responders (responders as reference)
PBMCs	scRNAseq	monocytes	TRIM25	3.19371839308263e-46	-0.207101257610119	0.276	0.373	1.07110927467205e-41	pre-VDZ, non-responders vs responders (responders as reference)
PBMCs	scRNAseq	monocytes	RPL35	3.72869679165424e-46	-0.286543603431948	0.855	0.898	1.250530329985e-41	pre-VDZ, non-responders vs responders (responders as reference)
PBMCs	scRNAseq	monocytes	RPL41	3.78043751113538e-46	-0.313725003190527	0.94	0.958	1.26788313248458e-41	pre-VDZ, non-responders vs responders (responders as reference)
PBMCs	scRNAseq	monocytes	RNF144B	4.02703602138797e-46	-0.202175463208447	0.168	0.264	1.3505873408531e-41	pre-VDZ, non-responders vs responders (responders as reference)
PBMCs	scRNAseq	monocytes	PLIN2	6.15904903658402e-46	-0.426521387106457	0.367	0.474	2.06562186588955e-41	pre-VDZ, non-responders vs responders (responders as reference)
PBMCs	scRNAseq	monocytes	RPS21	6.71345885165462e-46	-0.290122912143031	0.689	0.758	2.25155982966793e-41	pre-VDZ, non-responders vs responders (responders as reference)
PBMCs	scRNAseq	monocytes	ELK3	6.75059554735932e-46	-0.274481677433251	0.506	0.587	2.26401473467337e-41	pre-VDZ, non-responders vs responders (responders as reference)
PBMCs	scRNAseq	monocytes	DAB2	8.22676912833511e-46	-0.153288453066649	0.078	0.153	2.75909383026103e-41	pre-VDZ, non-responders vs responders (responders as reference)
PBMCs	scRNAseq	monocytes	PNISR	1.16137365693098e-45	-0.237465900834958	0.56	0.635	3.89501497061513e-41	pre-VDZ, non-responders vs responders (responders as reference)
PBMCs	scRNAseq	monocytes	RPL26	1.35565173901593e-45	-0.318360271854957	0.872	0.9	4.54658480231162e-41	pre-VDZ, non-responders vs responders (responders as reference)
PBMCs	scRNAseq	monocytes	AC020916.1	3.40129079226994e-45	-0.277410876096515	0.575	0.663	1.14072490591149e-40	pre-VDZ, non-responders vs responders (responders as reference)
PBMCs	scRNAseq	monocytes	GBP2	4.77788715832936e-45	0.205188181201459	0.451	0.467	1.6024077951605e-40	pre-VDZ, non-responders vs responders (responders as reference)
PBMCs	scRNAseq	monocytes	HSPD1	5.58089975997185e-45	-0.406905730589117	0.288	0.383	1.87172216149936e-40	pre-VDZ, non-responders vs responders (responders as reference)
PBMCs	scRNAseq	monocytes	UBA52	8.20302303318626e-45	-0.260242087941965	0.917	0.947	2.75112986487001e-40	pre-VDZ, non-responders vs responders (responders as reference)
PBMCs	scRNAseq	monocytes	FMN1	2.97080650001871e-44	-0.133206125315062	0.058	0.123	9.96349083976275e-40	pre-VDZ, non-responders vs responders (responders as reference)
PBMCs	scRNAseq	monocytes	CCR1	4.25303756513741e-44	-0.278164312851168	0.565	0.658	1.42638373859579e-39	pre-VDZ, non-responders vs responders (responders as reference)
PBMCs	scRNAseq	monocytes	HLA-DQA2	4.29629238045453e-44	0.102223582096914	0.114	0.052	1.44089053855684e-39	pre-VDZ, non-responders vs responders (responders as reference)
PBMCs	scRNAseq	monocytes	MRPL18	6.80400897060076e-44	-0.175481032616778	0.135	0.215	2.28192852856008e-39	pre-VDZ, non-responders vs responders (responders as reference)
PBMCs	scRNAseq	monocytes	RPL13A	7.43896442459384e-44	-0.311379793672411	0.918	0.953	2.49487988872028e-39	pre-VDZ, non-responders vs responders (responders as reference)
PBMCs	scRNAseq	monocytes	BRI3	9.08561645955818e-44	-0.239564138296767	0.848	0.897	3.04713404820662e-39	pre-VDZ, non-responders vs responders (responders as reference)
PBMCs	scRNAseq	monocytes	SMAP2	1.04469811265915e-43	-0.250732590365768	0.528	0.619	3.50370853023626e-39	pre-VDZ, non-responders vs responders (responders as reference)
PBMCs	scRNAseq	monocytes	SAP30	1.08317973628786e-43	-0.171031670085584	0.124	0.207	3.63276819956222e-39	pre-VDZ, non-responders vs responders (responders as reference)
PBMCs	scRNAseq	monocytes	CHIC2	1.34468558591091e-43	-0.203850693148852	0.321	0.419	4.509806518028e-39	pre-VDZ, non-responders vs responders (responders as reference)
PBMCs	scRNAseq	monocytes	KYNU	1.39949114099948e-43	-0.256239886027929	0.553	0.619	4.69361338868405e-39	pre-VDZ, non-responders vs responders (responders as reference)
PBMCs	scRNAseq	monocytes	TNFAIP2	1.79138342204401e-43	-0.257153909819172	0.652	0.746	6.00794172085122e-39	pre-VDZ, non-responders vs responders (responders as reference)
PBMCs	scRNAseq	monocytes	NCF1	3.26343720527191e-43	0.121068378882028	0.476	0.536	1.09449156990409e-38	pre-VDZ, non-responders vs responders (responders as reference)
PBMCs	scRNAseq	monocytes	SGMS1	3.84706759441061e-43	-0.210154656484431	0.318	0.416	1.29022952981343e-38	pre-VDZ, non-responders vs responders (responders as reference)
PBMCs	scRNAseq	monocytes	IFNGR2	4.8504365184003e-43	-0.179033108386655	0.531	0.648	1.62673939954109e-38	pre-VDZ, non-responders vs responders (responders as reference)
PBMCs	scRNAseq	monocytes	JUND	5.07551328721664e-43	-0.264540030157533	0.955	0.969	1.70222564626672e-38	pre-VDZ, non-responders vs responders (responders as reference)
PBMCs	scRNAseq	monocytes	FOXO3	5.0935777304455e-43	-0.236598209643518	0.575	0.631	1.70828409923681e-38	pre-VDZ, non-responders vs responders (responders as reference)
PBMCs	scRNAseq	monocytes	S100A4	6.87065768763551e-43	-0.242950701532346	0.946	0.968	2.3042811752792e-38	pre-VDZ, non-responders vs responders (responders as reference)
PBMCs	scRNAseq	monocytes	TUT7	7.44641303951339e-43	-0.243897079345328	0.534	0.621	2.497378005192e-38	pre-VDZ, non-responders vs responders (responders as reference)
PBMCs	scRNAseq	monocytes	RPL19	8.22032785475761e-43	-0.319096814147409	0.873	0.911	2.75693355592861e-38	pre-VDZ, non-responders vs responders (responders as reference)
PBMCs	scRNAseq	monocytes	RPS15	8.55837907543718e-43	-0.27275989725143	0.909	0.942	2.87030917432012e-38	pre-VDZ, non-responders vs responders (responders as reference)
PBMCs	scRNAseq	monocytes	ANKRD12	2.60927106326377e-42	-0.271518196238236	0.614	0.694	8.75097329197402e-38	pre-VDZ, non-responders vs responders (responders as reference)
PBMCs	scRNAseq	monocytes	S100A12	3.78668638274851e-42	-0.332577414452971	0.649	0.745	1.2699788790462e-37	pre-VDZ, non-responders vs responders (responders as reference)
PBMCs	scRNAseq	monocytes	SLC25A6	4.19601029337469e-42	-0.27395347518265	0.751	0.817	1.407257932192e-37	pre-VDZ, non-responders vs responders (responders as reference)
PBMCs	scRNAseq	monocytes	RPL27A	9.1041031937003e-42	-0.296319839755672	0.874	0.912	3.05333412910321e-37	pre-VDZ, non-responders vs responders (responders as reference)
PBMCs	scRNAseq	monocytes	DHRS9	1.289355855656e-41	-0.144853357044179	0.079	0.152	4.32424166869908e-37	pre-VDZ, non-responders vs responders (responders as reference)
PBMCs	scRNAseq	monocytes	CHORDC1	1.29831606337606e-41	-0.201107767380671	0.2	0.283	4.35429241335063e-37	pre-VDZ, non-responders vs responders (responders as reference)
PBMCs	scRNAseq	monocytes	CSGALNACT2	2.08286726742679e-41	-0.239652389354912	0.695	0.745	6.98552024149596e-37	pre-VDZ, non-responders vs responders (responders as reference)
PBMCs	scRNAseq	monocytes	STX7	2.68040442742626e-41	-0.201275755785816	0.313	0.411	8.98954036870218e-37	pre-VDZ, non-responders vs responders (responders as reference)
PBMCs	scRNAseq	monocytes	RPL18	2.70554283283462e-41	-0.27353438007847	0.919	0.946	9.07384955276074e-37	pre-VDZ, non-responders vs responders (responders as reference)
PBMCs	scRNAseq	monocytes	ADK	3.74115075641095e-41	-0.121085758142124	0.084	0.158	1.2547071406851e-36	pre-VDZ, non-responders vs responders (responders as reference)
PBMCs	scRNAseq	monocytes	CAMKK2	6.1751762862502e-41	-0.208366749497383	0.397	0.49	2.07103062288259e-36	pre-VDZ, non-responders vs responders (responders as reference)
PBMCs	scRNAseq	monocytes	PSME2	6.99434947066561e-41	0.241225416525158	0.575	0.564	2.34576492547183e-36	pre-VDZ, non-responders vs responders (responders as reference)
PBMCs	scRNAseq	monocytes	FXR1	7.46249419283747e-41	-0.198666979079755	0.345	0.442	2.50277130239383e-36	pre-VDZ, non-responders vs responders (responders as reference)
PBMCs	scRNAseq	monocytes	ATP5F1E	8.75742741755983e-41	-0.237287686393577	0.868	0.913	2.93706600730121e-36	pre-VDZ, non-responders vs responders (responders as reference)
PBMCs	scRNAseq	monocytes	ARL8B	1.36670976018453e-40	-0.22891887717131	0.582	0.666	4.58367119370687e-36	pre-VDZ, non-responders vs responders (responders as reference)
PBMCs	scRNAseq	monocytes	RPL38	1.47014018663591e-40	-0.272981067516904	0.741	0.792	4.93055615793952e-36	pre-VDZ, non-responders vs responders (responders as reference)
PBMCs	scRNAseq	monocytes	TLR4	1.51773410392263e-40	-0.210395253083683	0.306	0.41	5.0901766377357e-36	pre-VDZ, non-responders vs responders (responders as reference)
PBMCs	scRNAseq	monocytes	TIMP1	1.92699166205468e-40	0.373558747640906	0.856	0.847	6.46274463619899e-36	pre-VDZ, non-responders vs responders (responders as reference)
PBMCs	scRNAseq	monocytes	FOLR3	2.0225049154964e-40	-0.198792082290831	0.094	0.16	6.78307698559181e-36	pre-VDZ, non-responders vs responders (responders as reference)
PBMCs	scRNAseq	monocytes	FAM110A	3.28530571932488e-40	-0.172581947482421	0.252	0.343	1.10182583214718e-35	pre-VDZ, non-responders vs responders (responders as reference)
PBMCs	scRNAseq	monocytes	SAMSN1	4.9736161020606e-40	-0.253278478569914	0.787	0.83	1.66805136830908e-35	pre-VDZ, non-responders vs responders (responders as reference)
PBMCs	scRNAseq	monocytes	NAA50	8.47784013508526e-40	-0.165406691237966	0.215	0.313	2.8432980245049e-35	pre-VDZ, non-responders vs responders (responders as reference)
PBMCs	scRNAseq	monocytes	RPL7A	9.49170477946625e-40	-0.271597593285528	0.904	0.937	3.18332794893739e-35	pre-VDZ, non-responders vs responders (responders as reference)
PBMCs	scRNAseq	monocytes	IQGAP1	1.11054993702531e-39	-0.230432103587829	0.812	0.863	3.72456237879549e-35	pre-VDZ, non-responders vs responders (responders as reference)
PBMCs	scRNAseq	monocytes	RPL23A	1.15391380315903e-39	-0.292085476392898	0.845	0.894	3.86999611303476e-35	pre-VDZ, non-responders vs responders (responders as reference)
PBMCs	scRNAseq	monocytes	SLC4A7	1.44779370768513e-39	-0.189536925947833	0.184	0.256	4.85561053683438e-35	pre-VDZ, non-responders vs responders (responders as reference)
PBMCs	scRNAseq	monocytes	SLC35E3	1.53208981171036e-39	-0.16519056315199	0.132	0.215	5.13832281051419e-35	pre-VDZ, non-responders vs responders (responders as reference)
PBMCs	scRNAseq	monocytes	NUP214	2.04912999413039e-39	-0.206351302407877	0.56	0.639	6.8723721743145e-35	pre-VDZ, non-responders vs responders (responders as reference)
PBMCs	scRNAseq	monocytes	RPL32	3.94139010610544e-39	-0.294830876326113	0.899	0.928	1.32186341378564e-34	pre-VDZ, non-responders vs responders (responders as reference)
PBMCs	scRNAseq	monocytes	FCAR	4.04438922666602e-39	-0.231418692864388	0.377	0.459	1.35640725883925e-34	pre-VDZ, non-responders vs responders (responders as reference)
PBMCs	scRNAseq	monocytes	EIF5	4.17871950990863e-39	-0.234061046958319	0.842	0.878	1.40145894923316e-34	pre-VDZ, non-responders vs responders (responders as reference)
PBMCs	scRNAseq	monocytes	SLC7A5	4.27741366455917e-39	0.233392940679284	0.435	0.355	1.43455899481985e-34	pre-VDZ, non-responders vs responders (responders as reference)
PBMCs	scRNAseq	monocytes	LUC7L3	4.68344519241687e-39	-0.202637074205511	0.428	0.505	1.57073384863277e-34	pre-VDZ, non-responders vs responders (responders as reference)
PBMCs	scRNAseq	monocytes	RPS14	7.02276306290659e-39	-0.27361937497299	0.941	0.959	2.35529427603761e-34	pre-VDZ, non-responders vs responders (responders as reference)
PBMCs	scRNAseq	monocytes	RPL9	7.31833876704636e-39	-0.264995492398298	0.932	0.951	2.45442445569201e-34	pre-VDZ, non-responders vs responders (responders as reference)
PBMCs	scRNAseq	monocytes	MAP3K20	9.6891846217682e-39	-0.223602268383407	0.318	0.412	3.24955873844862e-34	pre-VDZ, non-responders vs responders (responders as reference)
PBMCs	scRNAseq	monocytes	WTAP	1.03489813611541e-38	-0.245458705475431	0.56	0.641	3.47084136890387e-34	pre-VDZ, non-responders vs responders (responders as reference)
PBMCs	scRNAseq	monocytes	SPI1	1.10189739497689e-38	-0.0999101389427106	0.554	0.66	3.6955434832735e-34	pre-VDZ, non-responders vs responders (responders as reference)
PBMCs	scRNAseq	monocytes	RPL34	1.11326751662307e-38	-0.285783751335563	0.913	0.933	3.73367659725045e-34	pre-VDZ, non-responders vs responders (responders as reference)
PBMCs	scRNAseq	monocytes	RPL5	1.25151869924511e-38	-0.289140336760456	0.862	0.9	4.19734341352826e-34	pre-VDZ, non-responders vs responders (responders as reference)
PBMCs	scRNAseq	monocytes	SULT1A1	1.50219253990785e-38	-0.163310329952191	0.204	0.29	5.03805334034295e-34	pre-VDZ, non-responders vs responders (responders as reference)
PBMCs	scRNAseq	monocytes	DNAJA1	1.70613996861135e-38	-0.298544361521361	0.682	0.742	5.72205222672876e-34	pre-VDZ, non-responders vs responders (responders as reference)
PBMCs	scRNAseq	monocytes	RPS12	1.8706153779984e-38	-0.285923947389423	0.919	0.949	6.27366985473103e-34	pre-VDZ, non-responders vs responders (responders as reference)
PBMCs	scRNAseq	monocytes	RPL29	2.47938365135564e-38	-0.249262166575898	0.916	0.94	8.31535688991653e-34	pre-VDZ, non-responders vs responders (responders as reference)
PBMCs	scRNAseq	monocytes	NAF1	2.76255434638425e-38	0.198160186617013	0.238	0.156	9.26505476690351e-34	pre-VDZ, non-responders vs responders (responders as reference)
PBMCs	scRNAseq	monocytes	RPS27	2.97817394049612e-38	-0.283117648701857	0.919	0.949	9.98819976163588e-34	pre-VDZ, non-responders vs responders (responders as reference)
PBMCs	scRNAseq	monocytes	TP53BP2	5.20855945227307e-38	-0.18241537659377	0.287	0.383	1.74684666910334e-33	pre-VDZ, non-responders vs responders (responders as reference)
PBMCs	scRNAseq	monocytes	CSF3R	7.04430047805724e-38	-0.221327050587138	0.647	0.726	2.36251749433084e-33	pre-VDZ, non-responders vs responders (responders as reference)
PBMCs	scRNAseq	monocytes	IL1A	9.68255943250856e-38	-0.224739989782153	0.056	0.113	3.24733678247472e-33	pre-VDZ, non-responders vs responders (responders as reference)
PBMCs	scRNAseq	monocytes	ACSL1	1.14699739677449e-37	-0.227286303579379	0.469	0.572	3.84679986930229e-33	pre-VDZ, non-responders vs responders (responders as reference)
PBMCs	scRNAseq	monocytes	PELI1	1.15939789322302e-37	-0.204483562961825	0.295	0.395	3.88838865429136e-33	pre-VDZ, non-responders vs responders (responders as reference)
PBMCs	scRNAseq	monocytes	PDE4DIP	1.18239659105716e-37	-0.159474519857691	0.115	0.19	3.96552168708749e-33	pre-VDZ, non-responders vs responders (responders as reference)
PBMCs	scRNAseq	monocytes	CD9	1.28240929434113e-37	-0.179612086674515	0.093	0.16	4.30094429136127e-33	pre-VDZ, non-responders vs responders (responders as reference)
PBMCs	scRNAseq	monocytes	RPL11	1.35630823226767e-37	-0.261670403904795	0.934	0.958	4.5487865493793e-33	pre-VDZ, non-responders vs responders (responders as reference)
PBMCs	scRNAseq	monocytes	HEBP2	1.67339064916757e-37	-0.188986025756449	0.369	0.473	5.61221755917818e-33	pre-VDZ, non-responders vs responders (responders as reference)
PBMCs	scRNAseq	monocytes	LDLR	1.68844970732872e-37	-0.226539280395653	0.401	0.491	5.66272262843906e-33	pre-VDZ, non-responders vs responders (responders as reference)
PBMCs	scRNAseq	monocytes	AGFG1	3.35694412713942e-37	-0.196011697041033	0.399	0.496	1.12585192136002e-32	pre-VDZ, non-responders vs responders (responders as reference)
PBMCs	scRNAseq	monocytes	RPS2	3.49130614602219e-37	-0.280833392441469	0.945	0.964	1.17091425525292e-32	pre-VDZ, non-responders vs responders (responders as reference)
PBMCs	scRNAseq	monocytes	WAC	8.88154094677257e-37	-0.204390276960382	0.516	0.602	2.97869120272858e-32	pre-VDZ, non-responders vs responders (responders as reference)
PBMCs	scRNAseq	monocytes	ANTXR2	1.21682218075254e-36	-0.251114672421398	0.534	0.605	4.08097822980787e-32	pre-VDZ, non-responders vs responders (responders as reference)
PBMCs	scRNAseq	monocytes	EVI2B	1.3741400658597e-36	-0.212488914244328	0.665	0.754	4.60859095288026e-32	pre-VDZ, non-responders vs responders (responders as reference)
PBMCs	scRNAseq	monocytes	RPL3	1.73160128421502e-36	-0.288744558195488	0.874	0.909	5.80744438700034e-32	pre-VDZ, non-responders vs responders (responders as reference)
PBMCs	scRNAseq	monocytes	SH3GLB1	1.80078023566751e-36	-0.199148385599765	0.422	0.52	6.03945675438171e-32	pre-VDZ, non-responders vs responders (responders as reference)
PBMCs	scRNAseq	monocytes	PTX3	2.1863957911781e-36	-0.267273201171436	0.117	0.192	7.3327342044531e-32	pre-VDZ, non-responders vs responders (responders as reference)
PBMCs	scRNAseq	monocytes	PNRC1	2.68475417099209e-36	-0.278194601995251	0.843	0.877	9.00412853867327e-32	pre-VDZ, non-responders vs responders (responders as reference)
PBMCs	scRNAseq	monocytes	CAPZA2	3.23961528505228e-36	-0.198076901321951	0.64	0.725	1.08650217430084e-31	pre-VDZ, non-responders vs responders (responders as reference)
PBMCs	scRNAseq	monocytes	CD99	3.33431943205419e-36	-0.247132459311739	0.562	0.64	1.11826405112233e-31	pre-VDZ, non-responders vs responders (responders as reference)
PBMCs	scRNAseq	monocytes	RPS29	5.15248867712659e-36	-0.275176198295442	0.785	0.841	1.72804165253472e-31	pre-VDZ, non-responders vs responders (responders as reference)
PBMCs	scRNAseq	monocytes	LILRA6	5.79040722501243e-36	-0.139296016690252	0.151	0.233	1.94198677512467e-31	pre-VDZ, non-responders vs responders (responders as reference)
PBMCs	scRNAseq	monocytes	RPS11	6.12715577727928e-36	-0.27021508165989	0.913	0.943	2.05492550458393e-31	pre-VDZ, non-responders vs responders (responders as reference)
PBMCs	scRNAseq	monocytes	GPCPD1	6.52341128496265e-36	-0.243264280751473	0.793	0.831	2.18782167675077e-31	pre-VDZ, non-responders vs responders (responders as reference)
PBMCs	scRNAseq	monocytes	CAST	6.74955818954781e-36	-0.207851142139937	0.757	0.832	2.26366682561055e-31	pre-VDZ, non-responders vs responders (responders as reference)
PBMCs	scRNAseq	monocytes	CLEC12A	1.07799736377562e-35	-0.211690199839941	0.421	0.505	3.61538755863066e-31	pre-VDZ, non-responders vs responders (responders as reference)
PBMCs	scRNAseq	monocytes	RPL12	1.51124295722784e-35	-0.25262580247479	0.916	0.941	5.06840662995072e-31	pre-VDZ, non-responders vs responders (responders as reference)
PBMCs	scRNAseq	monocytes	TCP1	1.67369521457759e-35	-0.165446080189535	0.219	0.299	5.61323901065033e-31	pre-VDZ, non-responders vs responders (responders as reference)
PBMCs	scRNAseq	monocytes	ANXA2	1.76011035780687e-35	-0.234184116181874	0.842	0.882	5.90305811801269e-31	pre-VDZ, non-responders vs responders (responders as reference)
PBMCs	scRNAseq	monocytes	ZNF267	1.87769988944849e-35	-0.222866478202487	0.553	0.63	6.29742988923233e-31	pre-VDZ, non-responders vs responders (responders as reference)
PBMCs	scRNAseq	monocytes	ZFAS1	2.00169345190384e-35	-0.233014763340432	0.705	0.757	6.71327949899511e-31	pre-VDZ, non-responders vs responders (responders as reference)
PBMCs	scRNAseq	monocytes	CPM	2.10777416786234e-35	-0.144411097603489	0.102	0.171	7.06905300417673e-31	pre-VDZ, non-responders vs responders (responders as reference)
PBMCs	scRNAseq	monocytes	PLEKHO2	2.38081324119332e-35	-0.183061217438891	0.341	0.432	7.98477144831417e-31	pre-VDZ, non-responders vs responders (responders as reference)
PBMCs	scRNAseq	monocytes	CYBB	2.47068286224042e-35	0.0671768511125705	0.759	0.823	8.28617618338193e-31	pre-VDZ, non-responders vs responders (responders as reference)
PBMCs	scRNAseq	monocytes	RPL15	2.55381764767011e-35	-0.272070173664156	0.908	0.93	8.56499362675602e-31	pre-VDZ, non-responders vs responders (responders as reference)
PBMCs	scRNAseq	monocytes	PTPRE	3.1804445473381e-35	-0.230334642943182	0.807	0.851	1.06665749228625e-30	pre-VDZ, non-responders vs responders (responders as reference)
PBMCs	scRNAseq	monocytes	RPL18A	3.60430594561018e-35	-0.277378673236452	0.907	0.932	1.20881212803874e-30	pre-VDZ, non-responders vs responders (responders as reference)
PBMCs	scRNAseq	monocytes	CREB5	3.85873872776926e-35	-0.223922807648289	0.329	0.413	1.29414379451925e-30	pre-VDZ, non-responders vs responders (responders as reference)
PBMCs	scRNAseq	monocytes	ARF6	3.90329033232233e-35	-0.223560626185612	0.745	0.817	1.30908551165426e-30	pre-VDZ, non-responders vs responders (responders as reference)
PBMCs	scRNAseq	monocytes	HSPE1	4.7030862694469e-35	-0.252566606688419	0.223	0.3	1.5773210730471e-30	pre-VDZ, non-responders vs responders (responders as reference)
PBMCs	scRNAseq	monocytes	RPS7	4.98036810401e-35	-0.261574094290978	0.898	0.924	1.67031585472287e-30	pre-VDZ, non-responders vs responders (responders as reference)
PBMCs	scRNAseq	monocytes	PPP4R2	6.53998603354357e-35	-0.181028227726578	0.377	0.471	2.19338051592984e-30	pre-VDZ, non-responders vs responders (responders as reference)
PBMCs	scRNAseq	monocytes	PNRC2	7.70912544578948e-35	-0.204376227135801	0.501	0.571	2.58548649200888e-30	pre-VDZ, non-responders vs responders (responders as reference)
PBMCs	scRNAseq	monocytes	RGCC	1.22251418809821e-34	-0.324769840750404	0.596	0.669	4.10006808404379e-30	pre-VDZ, non-responders vs responders (responders as reference)
PBMCs	scRNAseq	monocytes	SDCBP	1.30814394061651e-34	-0.220136102443289	0.809	0.858	4.38725314803965e-30	pre-VDZ, non-responders vs responders (responders as reference)
PBMCs	scRNAseq	monocytes	RNF13	1.51095422412892e-34	-0.200519288721078	0.45	0.533	5.06743827688356e-30	pre-VDZ, non-responders vs responders (responders as reference)
PBMCs	scRNAseq	monocytes	RRAGC	1.67371275227589e-34	-0.183191318890025	0.299	0.389	5.61329782858288e-30	pre-VDZ, non-responders vs responders (responders as reference)
PBMCs	scRNAseq	monocytes	TCF25	2.63630309992434e-34	-0.191987236790876	0.584	0.669	8.84163333652626e-30	pre-VDZ, non-responders vs responders (responders as reference)
PBMCs	scRNAseq	monocytes	RACK1	2.97261914607772e-34	-0.235602476401362	0.892	0.929	9.96957009211547e-30	pre-VDZ, non-responders vs responders (responders as reference)
PBMCs	scRNAseq	monocytes	CD44	3.49883713930427e-34	-0.238456385055794	0.957	0.97	1.17343999977986e-29	pre-VDZ, non-responders vs responders (responders as reference)
PBMCs	scRNAseq	monocytes	ATP2B1-AS1	3.62435391971205e-34	-0.316701390112435	0.666	0.705	1.21553581759303e-29	pre-VDZ, non-responders vs responders (responders as reference)
PBMCs	scRNAseq	monocytes	NCEH1	3.74973742589303e-34	-0.139252667249273	0.117	0.19	1.25758693789601e-29	pre-VDZ, non-responders vs responders (responders as reference)
PBMCs	scRNAseq	monocytes	MT-ND1	3.75501726627598e-34	-0.195244833407429	0.997	0.998	1.25935769076364e-29	pre-VDZ, non-responders vs responders (responders as reference)
PBMCs	scRNAseq	monocytes	ARRDC3	4.15908993321081e-34	-0.224271743116769	0.478	0.566	1.39487558180024e-29	pre-VDZ, non-responders vs responders (responders as reference)
PBMCs	scRNAseq	monocytes	APOL6	4.18499102837686e-34	0.172648673980895	0.295	0.276	1.40356229109703e-29	pre-VDZ, non-responders vs responders (responders as reference)
PBMCs	scRNAseq	monocytes	MT-ND3	5.01895924512233e-34	-0.19904086130875	0.995	0.993	1.68325855162913e-29	pre-VDZ, non-responders vs responders (responders as reference)
PBMCs	scRNAseq	monocytes	OTUD1	6.12171516230945e-34	-0.210100496813482	0.457	0.554	2.05310083113534e-29	pre-VDZ, non-responders vs responders (responders as reference)
PBMCs	scRNAseq	monocytes	DDX17	7.39404254408015e-34	-0.213411854892071	0.724	0.778	2.4798139884336e-29	pre-VDZ, non-responders vs responders (responders as reference)
PBMCs	scRNAseq	monocytes	GRASP	8.11884990654088e-34	0.208560291998471	0.485	0.393	2.72289988165568e-29	pre-VDZ, non-responders vs responders (responders as reference)
PBMCs	scRNAseq	monocytes	SON	8.44633582462056e-34	-0.212798719960293	0.73	0.786	2.83273210886124e-29	pre-VDZ, non-responders vs responders (responders as reference)
PBMCs	scRNAseq	monocytes	PHC2	9.55569985823195e-34	-0.149361256565354	0.201	0.283	3.20479061845383e-29	pre-VDZ, non-responders vs responders (responders as reference)
PBMCs	scRNAseq	monocytes	RIN2	9.74851828129666e-34	-0.160548912076323	0.15	0.227	3.26945806118128e-29	pre-VDZ, non-responders vs responders (responders as reference)
PBMCs	scRNAseq	monocytes	HK2	1.04381520312891e-33	-0.18088320642929	0.237	0.321	3.50074742825374e-29	pre-VDZ, non-responders vs responders (responders as reference)
PBMCs	scRNAseq	monocytes	UBALD2	1.05663884547309e-33	-0.155893879278064	0.335	0.437	3.54375535994763e-29	pre-VDZ, non-responders vs responders (responders as reference)
PBMCs	scRNAseq	monocytes	FYB1	1.43562594116447e-33	0.0464640064333399	0.603	0.674	4.81480228147739e-29	pre-VDZ, non-responders vs responders (responders as reference)
PBMCs	scRNAseq	monocytes	CACYBP	1.60019724250142e-33	-0.154105796479152	0.154	0.22	5.36674151190127e-29	pre-VDZ, non-responders vs responders (responders as reference)
PBMCs	scRNAseq	monocytes	ADSS	1.82195268243157e-33	-0.181544523350848	0.264	0.351	6.11046490633901e-29	pre-VDZ, non-responders vs responders (responders as reference)
PBMCs	scRNAseq	monocytes	LGALS1	2.68249203777517e-33	-0.245640796572281	0.867	0.902	8.99654179629037e-29	pre-VDZ, non-responders vs responders (responders as reference)
PBMCs	scRNAseq	monocytes	MIR222HG	3.07818254207301e-33	-0.183383160774283	0.17	0.246	1.03236086096045e-28	pre-VDZ, non-responders vs responders (responders as reference)
PBMCs	scRNAseq	monocytes	IRAK3	3.42127506882872e-33	-0.205725754975944	0.591	0.671	1.14742723258377e-28	pre-VDZ, non-responders vs responders (responders as reference)
PBMCs	scRNAseq	monocytes	JOSD1	3.61167629950327e-33	0.212544986480383	0.546	0.47	1.21128399732741e-28	pre-VDZ, non-responders vs responders (responders as reference)
PBMCs	scRNAseq	monocytes	LACTB	3.78602043849009e-33	-0.20447173413125	0.621	0.705	1.26975553466081e-28	pre-VDZ, non-responders vs responders (responders as reference)
PBMCs	scRNAseq	monocytes	SLC39A8	4.27654699604233e-33	-0.135867193825057	0.07	0.13	1.43426833153268e-28	pre-VDZ, non-responders vs responders (responders as reference)
PBMCs	scRNAseq	monocytes	ALAS1	5.78640469996448e-33	-0.165152226500828	0.118	0.181	1.94064440827409e-28	pre-VDZ, non-responders vs responders (responders as reference)
PBMCs	scRNAseq	monocytes	RPL7	7.13969352191084e-33	-0.252999432576161	0.886	0.919	2.39451041337846e-28	pre-VDZ, non-responders vs responders (responders as reference)
PBMCs	scRNAseq	monocytes	FAU	8.70522455615946e-33	-0.249821968762519	0.872	0.908	2.91955821164476e-28	pre-VDZ, non-responders vs responders (responders as reference)
PBMCs	scRNAseq	monocytes	TMCO3	8.76336622702881e-33	-0.155338037353587	0.218	0.3	2.93905776522092e-28	pre-VDZ, non-responders vs responders (responders as reference)
PBMCs	scRNAseq	monocytes	LINC01588	9.22485007793857e-33	-0.180526193866993	0.178	0.255	3.09383021913904e-28	pre-VDZ, non-responders vs responders (responders as reference)
PBMCs	scRNAseq	monocytes	PMEPA1	9.86347135319064e-33	0.21926373622406	0.239	0.161	3.30801102243308e-28	pre-VDZ, non-responders vs responders (responders as reference)
PBMCs	scRNAseq	monocytes	PLAUR	1.11475216797822e-32	0.290387424246108	0.863	0.839	3.73865582096536e-28	pre-VDZ, non-responders vs responders (responders as reference)
PBMCs	scRNAseq	monocytes	RPS24	1.28321859431244e-32	-0.245511895198756	0.929	0.949	4.30365852160505e-28	pre-VDZ, non-responders vs responders (responders as reference)
PBMCs	scRNAseq	monocytes	NR1D2	1.46815411045773e-32	-0.145203138372483	0.19	0.273	4.92389525565313e-28	pre-VDZ, non-responders vs responders (responders as reference)
PBMCs	scRNAseq	monocytes	SGMS2	2.00513600642926e-32	-0.18952440740355	0.313	0.398	6.72482513836245e-28	pre-VDZ, non-responders vs responders (responders as reference)
PBMCs	scRNAseq	monocytes	MARCH7	2.08795732434311e-32	-0.17694240794926	0.38	0.462	7.00259127438193e-28	pre-VDZ, non-responders vs responders (responders as reference)
PBMCs	scRNAseq	monocytes	WDR26	2.21200553829062e-32	-0.179918587063785	0.395	0.477	7.41862417431907e-28	pre-VDZ, non-responders vs responders (responders as reference)
PBMCs	scRNAseq	monocytes	SOD2	2.52258565706036e-32	-0.320224383455181	0.87	0.881	8.46024777664902e-28	pre-VDZ, non-responders vs responders (responders as reference)
PBMCs	scRNAseq	monocytes	ACTN1	2.66301242704471e-32	-0.197066403860332	0.362	0.454	8.93121107782255e-28	pre-VDZ, non-responders vs responders (responders as reference)
PBMCs	scRNAseq	monocytes	NCF2	3.27976042750223e-32	-0.19395307297329	0.781	0.844	1.0999660521757e-27	pre-VDZ, non-responders vs responders (responders as reference)
PBMCs	scRNAseq	monocytes	PDE4A	4.06806438785662e-32	0.198570748465828	0.389	0.308	1.36434743439935e-27	pre-VDZ, non-responders vs responders (responders as reference)
PBMCs	scRNAseq	monocytes	SERTAD2	4.24857617494244e-32	-0.183496179083982	0.29	0.381	1.4248874775522e-27	pre-VDZ, non-responders vs responders (responders as reference)
PBMCs	scRNAseq	monocytes	USP15	4.46765692647233e-32	-0.189321183157309	0.589	0.67	1.49836278000029e-27	pre-VDZ, non-responders vs responders (responders as reference)
PBMCs	scRNAseq	monocytes	CGAS	4.48033876615728e-32	-0.133890671023539	0.15	0.229	1.50261601539383e-27	pre-VDZ, non-responders vs responders (responders as reference)
PBMCs	scRNAseq	monocytes	PLEKHF2	5.49901361022917e-32	-0.151728564955863	0.229	0.309	1.84425918459866e-27	pre-VDZ, non-responders vs responders (responders as reference)
PBMCs	scRNAseq	monocytes	ABI1	7.78362434136367e-32	-0.169460308892948	0.33	0.411	2.61047193160655e-27	pre-VDZ, non-responders vs responders (responders as reference)
PBMCs	scRNAseq	monocytes	SH3BGRL3	7.8771183149577e-32	-0.217470854675427	0.908	0.939	2.64182794047051e-27	pre-VDZ, non-responders vs responders (responders as reference)
PBMCs	scRNAseq	monocytes	SYF2	1.04137155563616e-31	-0.179815378820013	0.474	0.555	3.49255192329255e-27	pre-VDZ, non-responders vs responders (responders as reference)
PBMCs	scRNAseq	monocytes	RPL4	1.65862639636193e-31	-0.24631687154923	0.786	0.836	5.56270120811864e-27	pre-VDZ, non-responders vs responders (responders as reference)
PBMCs	scRNAseq	monocytes	GAPDH	2.06301588769523e-31	-0.260938117461063	0.877	0.916	6.91894268415226e-27	pre-VDZ, non-responders vs responders (responders as reference)
PBMCs	scRNAseq	monocytes	NORAD	3.66879643601402e-31	-0.200862227783136	0.496	0.567	1.23044094871038e-26	pre-VDZ, non-responders vs responders (responders as reference)
PBMCs	scRNAseq	monocytes	TANK	4.28778105860994e-31	-0.193857619623106	0.458	0.534	1.4380360114366e-26	pre-VDZ, non-responders vs responders (responders as reference)
PBMCs	scRNAseq	monocytes	CARD8-AS1	4.5993565114482e-31	-0.141726012786565	0.196	0.264	1.5425321868095e-26	pre-VDZ, non-responders vs responders (responders as reference)
PBMCs	scRNAseq	monocytes	NUMB	4.79639887695245e-31	-0.222066597673664	0.552	0.632	1.60861625535231e-26	pre-VDZ, non-responders vs responders (responders as reference)
PBMCs	scRNAseq	monocytes	EXOSC6	5.22338931701701e-31	-0.121151299520269	0.157	0.237	1.75182030914117e-26	pre-VDZ, non-responders vs responders (responders as reference)
PBMCs	scRNAseq	monocytes	VAPA	5.91904003653615e-31	-0.207197631331056	0.702	0.755	1.98512764745349e-26	pre-VDZ, non-responders vs responders (responders as reference)
PBMCs	scRNAseq	monocytes	AC015912.3	7.27663873307255e-31	-0.133135723606693	0.073	0.129	2.44043909829787e-26	pre-VDZ, non-responders vs responders (responders as reference)
PBMCs	scRNAseq	monocytes	RBM47	8.55337292534002e-31	-0.179084594902171	0.464	0.56	2.86863021170054e-26	pre-VDZ, non-responders vs responders (responders as reference)
PBMCs	scRNAseq	monocytes	HBEGF	9.32286895100359e-31	0.162535749787411	0.258	0.175	3.12670378878758e-26	pre-VDZ, non-responders vs responders (responders as reference)
PBMCs	scRNAseq	monocytes	EFHD2	9.38061110343396e-31	-0.175391802755138	0.797	0.863	3.14606935186968e-26	pre-VDZ, non-responders vs responders (responders as reference)
PBMCs	scRNAseq	monocytes	MT-ND4L	2.41613970165755e-30	-0.205858039979183	0.695	0.741	8.10324933141908e-26	pre-VDZ, non-responders vs responders (responders as reference)
PBMCs	scRNAseq	monocytes	RPL27	3.42302409737566e-30	-0.227229351863411	0.879	0.909	1.14801382177785e-25	pre-VDZ, non-responders vs responders (responders as reference)
PBMCs	scRNAseq	monocytes	HCLS1	4.00200248917373e-30	-0.16903418607632	0.602	0.69	1.34219159481909e-25	pre-VDZ, non-responders vs responders (responders as reference)
PBMCs	scRNAseq	monocytes	ZFR	4.99922546137334e-30	-0.154044774894378	0.258	0.342	1.67664023523539e-25	pre-VDZ, non-responders vs responders (responders as reference)
PBMCs	scRNAseq	monocytes	AC007952.4	5.41318460879736e-30	-0.256539284053215	0.288	0.372	1.81547385409846e-25	pre-VDZ, non-responders vs responders (responders as reference)
PBMCs	scRNAseq	monocytes	MTF1	5.61889310152509e-30	-0.149451572666596	0.216	0.287	1.88446436838949e-25	pre-VDZ, non-responders vs responders (responders as reference)
PBMCs	scRNAseq	monocytes	RPS13	6.59891289648515e-30	-0.227193856579702	0.921	0.945	2.21314340722319e-25	pre-VDZ, non-responders vs responders (responders as reference)
PBMCs	scRNAseq	monocytes	KDM5A	7.14693771908929e-30	-0.180980767186555	0.413	0.496	2.39693997222817e-25	pre-VDZ, non-responders vs responders (responders as reference)
PBMCs	scRNAseq	monocytes	TPT1	7.38313592619349e-30	-0.224458466208644	0.968	0.982	2.47615612692677e-25	pre-VDZ, non-responders vs responders (responders as reference)
PBMCs	scRNAseq	monocytes	MYO1G	8.26461113556029e-30	-0.189571408251499	0.612	0.687	2.77178528264421e-25	pre-VDZ, non-responders vs responders (responders as reference)
PBMCs	scRNAseq	monocytes	PLEK	9.23426938701748e-30	-0.215958989242101	0.731	0.807	3.09698926701792e-25	pre-VDZ, non-responders vs responders (responders as reference)
PBMCs	scRNAseq	monocytes	SELENOK	1.032536824126e-29	0.241327195415838	0.588	0.519	3.46292200075376e-25	pre-VDZ, non-responders vs responders (responders as reference)
PBMCs	scRNAseq	monocytes	RPL24	1.23737074226169e-29	-0.231057708386641	0.875	0.908	4.14989399539724e-25	pre-VDZ, non-responders vs responders (responders as reference)
PBMCs	scRNAseq	monocytes	SLC12A6	1.59979983804426e-29	-0.156486213922299	0.279	0.362	5.36540869683285e-25	pre-VDZ, non-responders vs responders (responders as reference)
PBMCs	scRNAseq	monocytes	RPS25	1.65354514949818e-29	-0.222860770323019	0.889	0.923	5.54565972238699e-25	pre-VDZ, non-responders vs responders (responders as reference)
PBMCs	scRNAseq	monocytes	N4BP2L2	1.72036698469567e-29	-0.177876910726564	0.515	0.599	5.76976679327234e-25	pre-VDZ, non-responders vs responders (responders as reference)
PBMCs	scRNAseq	monocytes	CEP170	1.87662877296277e-29	-0.179605746150437	0.362	0.446	6.29383757876254e-25	pre-VDZ, non-responders vs responders (responders as reference)
PBMCs	scRNAseq	monocytes	RPL21	2.47759243899998e-29	-0.239496987654154	0.914	0.938	8.30934952191814e-25	pre-VDZ, non-responders vs responders (responders as reference)
PBMCs	scRNAseq	monocytes	ADAM10	2.65124284880137e-29	-0.155277629626443	0.383	0.477	8.89173826631002e-25	pre-VDZ, non-responders vs responders (responders as reference)
PBMCs	scRNAseq	monocytes	DUSP2	2.68937694444481e-29	0.205014005492613	0.337	0.251	9.01963239627899e-25	pre-VDZ, non-responders vs responders (responders as reference)
PBMCs	scRNAseq	monocytes	ARGLU1	3.54926665159917e-29	-0.175459764745154	0.458	0.542	1.19035304961333e-24	pre-VDZ, non-responders vs responders (responders as reference)
PBMCs	scRNAseq	monocytes	RSRP1	4.27272698818979e-29	-0.196602516091857	0.67	0.706	1.43298717729909e-24	pre-VDZ, non-responders vs responders (responders as reference)
PBMCs	scRNAseq	monocytes	RPS15A	4.66320502808063e-29	-0.240200013940321	0.912	0.936	1.56394570231768e-24	pre-VDZ, non-responders vs responders (responders as reference)
PBMCs	scRNAseq	monocytes	ATP5MG	5.20084300734245e-29	-0.193705836228327	0.797	0.845	1.74425872780251e-24	pre-VDZ, non-responders vs responders (responders as reference)
PBMCs	scRNAseq	monocytes	KCTD12	7.43937844938861e-29	-0.163568536039774	0.42	0.517	2.49501874435595e-24	pre-VDZ, non-responders vs responders (responders as reference)
PBMCs	scRNAseq	monocytes	MAPK6	7.56374812213724e-29	-0.174995387712631	0.497	0.587	2.53672984520239e-24	pre-VDZ, non-responders vs responders (responders as reference)
PBMCs	scRNAseq	monocytes	MSL3	7.76953770273019e-29	-0.144501465701614	0.261	0.343	2.60574755474165e-24	pre-VDZ, non-responders vs responders (responders as reference)
PBMCs	scRNAseq	monocytes	VPS4B	7.89944094263518e-29	-0.176502082387454	0.495	0.569	2.64931450334099e-24	pre-VDZ, non-responders vs responders (responders as reference)
PBMCs	scRNAseq	monocytes	CXCL3	8.29520407517422e-29	-0.38808995163144	0.094	0.155	2.78204554273193e-24	pre-VDZ, non-responders vs responders (responders as reference)
PBMCs	scRNAseq	monocytes	SP100	8.50482739560294e-29	-0.195427765583285	0.574	0.652	2.85234901193731e-24	pre-VDZ, non-responders vs responders (responders as reference)
PBMCs	scRNAseq	monocytes	IL6R	1.07496993449755e-28	-0.216388962532049	0.648	0.704	3.60523416631789e-24	pre-VDZ, non-responders vs responders (responders as reference)
PBMCs	scRNAseq	monocytes	PKM	1.17519457681796e-28	-0.188617490158038	0.635	0.717	3.94136757173209e-24	pre-VDZ, non-responders vs responders (responders as reference)
PBMCs	scRNAseq	monocytes	RC3H1	1.29049459202963e-28	-0.164039371481837	0.383	0.453	4.32806076274897e-24	pre-VDZ, non-responders vs responders (responders as reference)
PBMCs	scRNAseq	monocytes	TMEM43	1.39295941463856e-28	-0.128890343944417	0.178	0.252	4.67170728481481e-24	pre-VDZ, non-responders vs responders (responders as reference)
PBMCs	scRNAseq	monocytes	COX7C	1.41817488768263e-28	-0.197320550619278	0.691	0.761	4.75627493830999e-24	pre-VDZ, non-responders vs responders (responders as reference)
PBMCs	scRNAseq	monocytes	RPL28	1.48891233980693e-28	-0.214611999811276	0.947	0.963	4.99351420524447e-24	pre-VDZ, non-responders vs responders (responders as reference)
PBMCs	scRNAseq	monocytes	ZBTB7A	1.59818549934778e-28	-0.191989001135065	0.554	0.637	5.35999452771257e-24	pre-VDZ, non-responders vs responders (responders as reference)
PBMCs	scRNAseq	monocytes	TSPAN14	1.72376616972226e-28	-0.10084171942093	0.269	0.355	5.78116698001451e-24	pre-VDZ, non-responders vs responders (responders as reference)
PBMCs	scRNAseq	monocytes	H2AFY	1.87063744958487e-28	-0.153799461179067	0.738	0.814	6.27374387841773e-24	pre-VDZ, non-responders vs responders (responders as reference)
PBMCs	scRNAseq	monocytes	ELL2	2.29364744287194e-28	0.213747070413246	0.533	0.46	7.6924347939039e-24	pre-VDZ, non-responders vs responders (responders as reference)
PBMCs	scRNAseq	monocytes	RPL10A	2.49430319999542e-28	-0.241310379991962	0.78	0.835	8.36539407214463e-24	pre-VDZ, non-responders vs responders (responders as reference)
PBMCs	scRNAseq	monocytes	EIF3A	2.84958156384126e-28	-0.210267302674271	0.657	0.719	9.55692664881083e-24	pre-VDZ, non-responders vs responders (responders as reference)
PBMCs	scRNAseq	monocytes	YIPF4	3.15703464339393e-28	-0.157316521500599	0.283	0.357	1.05880627870146e-23	pre-VDZ, non-responders vs responders (responders as reference)
PBMCs	scRNAseq	monocytes	BAG3	3.20622754979034e-28	-0.109231386092445	0.06	0.111	1.07530459564868e-23	pre-VDZ, non-responders vs responders (responders as reference)
PBMCs	scRNAseq	monocytes	BMF	3.25463040960347e-28	-0.0867837256171084	0.061	0.115	1.09153794677281e-23	pre-VDZ, non-responders vs responders (responders as reference)
PBMCs	scRNAseq	monocytes	S100A8	3.72365518139943e-28	-0.287032588892438	0.822	0.876	1.24883947473774e-23	pre-VDZ, non-responders vs responders (responders as reference)
PBMCs	scRNAseq	monocytes	TCP11L2	3.86429259790028e-28	-0.119163931411803	0.141	0.211	1.29600645148379e-23	pre-VDZ, non-responders vs responders (responders as reference)
PBMCs	scRNAseq	monocytes	ADAM17	3.94263771471905e-28	-0.179685882664907	0.523	0.599	1.32228183676248e-23	pre-VDZ, non-responders vs responders (responders as reference)
PBMCs	scRNAseq	monocytes	COX4I1	4.39873565834848e-28	-0.200301420706533	0.829	0.874	1.47524796509691e-23	pre-VDZ, non-responders vs responders (responders as reference)
PBMCs	scRNAseq	monocytes	PTGER2	5.0334203740679e-28	-0.148696680457565	0.213	0.294	1.68810852505489e-23	pre-VDZ, non-responders vs responders (responders as reference)
PBMCs	scRNAseq	monocytes	VIM-AS1	5.0449357851763e-28	-0.186452604190612	0.363	0.421	1.69197056363243e-23	pre-VDZ, non-responders vs responders (responders as reference)
PBMCs	scRNAseq	monocytes	ULK1	5.24787394021912e-28	-0.164482801484153	0.24	0.319	1.76003196207069e-23	pre-VDZ, non-responders vs responders (responders as reference)
PBMCs	scRNAseq	monocytes	RPLP0	5.72412711735727e-28	-0.265627750820336	0.764	0.807	1.91975775261928e-23	pre-VDZ, non-responders vs responders (responders as reference)
PBMCs	scRNAseq	monocytes	PSMB8	6.43577161270653e-28	0.0747489986968048	0.41	0.433	2.15842908346952e-23	pre-VDZ, non-responders vs responders (responders as reference)
PBMCs	scRNAseq	monocytes	GPATCH2L	8.86839245700415e-28	-0.17327893986725	0.442	0.528	2.97428146223005e-23	pre-VDZ, non-responders vs responders (responders as reference)
PBMCs	scRNAseq	monocytes	NOTCH2	9.8435027318666e-28	-0.170440872381132	0.415	0.479	3.30131394621342e-23	pre-VDZ, non-responders vs responders (responders as reference)
PBMCs	scRNAseq	monocytes	RBPJ	1.03384229261588e-27	-0.19648520592832	0.645	0.713	3.46730028097514e-23	pre-VDZ, non-responders vs responders (responders as reference)
PBMCs	scRNAseq	monocytes	RPS27A	1.21727818395125e-27	-0.248444588346535	0.901	0.927	4.08250757333571e-23	pre-VDZ, non-responders vs responders (responders as reference)
PBMCs	scRNAseq	monocytes	XIST	1.22875780317495e-27	-0.188241494921341	0.322	0.413	4.12100792028815e-23	pre-VDZ, non-responders vs responders (responders as reference)
PBMCs	scRNAseq	monocytes	NSD3	1.3455190933721e-27	-0.158932179628896	0.297	0.375	4.51260193535135e-23	pre-VDZ, non-responders vs responders (responders as reference)
PBMCs	scRNAseq	monocytes	MARCKS	1.38370809609576e-27	-0.280813063776881	0.631	0.691	4.64068021268596e-23	pre-VDZ, non-responders vs responders (responders as reference)
PBMCs	scRNAseq	monocytes	GABPB1-AS1	1.45421759697304e-27	-0.156057305232745	0.182	0.256	4.87715497672817e-23	pre-VDZ, non-responders vs responders (responders as reference)
PBMCs	scRNAseq	monocytes	LCOR	1.49863905757269e-27	-0.160103205581298	0.353	0.442	5.02613567128728e-23	pre-VDZ, non-responders vs responders (responders as reference)
PBMCs	scRNAseq	monocytes	IL1B	1.50300926446747e-27	-0.677263500864933	0.541	0.545	5.04079247117101e-23	pre-VDZ, non-responders vs responders (responders as reference)
PBMCs	scRNAseq	monocytes	MID1IP1	1.7721919026788e-27	-0.156717679487372	0.257	0.338	5.94357720320414e-23	pre-VDZ, non-responders vs responders (responders as reference)
PBMCs	scRNAseq	monocytes	RICTOR	1.95204906923858e-27	-0.136662112593163	0.213	0.292	6.54678216841235e-23	pre-VDZ, non-responders vs responders (responders as reference)
PBMCs	scRNAseq	monocytes	LIMD2	2.2101237509139e-27	-0.169067564404433	0.515	0.599	7.41231303581505e-23	pre-VDZ, non-responders vs responders (responders as reference)
PBMCs	scRNAseq	monocytes	C6orf48	2.83827691025135e-27	-0.162512542644424	0.302	0.383	9.51901310160099e-23	pre-VDZ, non-responders vs responders (responders as reference)
PBMCs	scRNAseq	monocytes	CARD8	2.85779869460276e-27	-0.145482316221796	0.292	0.358	9.58448526195873e-23	pre-VDZ, non-responders vs responders (responders as reference)
PBMCs	scRNAseq	monocytes	AC023157.3	3.44058036730733e-27	-0.12215374114148	0.089	0.148	1.15390184358753e-22	pre-VDZ, non-responders vs responders (responders as reference)
PBMCs	scRNAseq	monocytes	MDM4	4.16238442535974e-27	-0.158450982650238	0.364	0.447	1.39598048857715e-22	pre-VDZ, non-responders vs responders (responders as reference)
PBMCs	scRNAseq	monocytes	DDX60L	4.58987270396346e-27	-0.159074575492029	0.286	0.368	1.53935150745527e-22	pre-VDZ, non-responders vs responders (responders as reference)
PBMCs	scRNAseq	monocytes	EAF1	4.77297527173337e-27	-0.191701206829505	0.52	0.6	1.60076044663394e-22	pre-VDZ, non-responders vs responders (responders as reference)
PBMCs	scRNAseq	monocytes	IDS	4.88614178374227e-27	-0.196920245904987	0.743	0.763	1.63871423143148e-22	pre-VDZ, non-responders vs responders (responders as reference)
PBMCs	scRNAseq	monocytes	CNBP	6.73760672997089e-27	-0.169968047958406	0.557	0.635	2.25965854509764e-22	pre-VDZ, non-responders vs responders (responders as reference)
PBMCs	scRNAseq	monocytes	AQP9	7.9933040142424e-27	-0.197046635942609	0.426	0.515	2.68079430029662e-22	pre-VDZ, non-responders vs responders (responders as reference)
PBMCs	scRNAseq	monocytes	LTA4H	9.96692622027675e-27	-0.15364545609509	0.539	0.631	3.34270771575642e-22	pre-VDZ, non-responders vs responders (responders as reference)
PBMCs	scRNAseq	monocytes	PTBP2	1.01795447758007e-26	-0.0844824782618967	0.066	0.118	3.41401572690803e-22	pre-VDZ, non-responders vs responders (responders as reference)
PBMCs	scRNAseq	monocytes	CCL3L1	1.03512416676081e-26	-0.400428944084624	0.078	0.136	3.47159943048242e-22	pre-VDZ, non-responders vs responders (responders as reference)
PBMCs	scRNAseq	monocytes	RSRC2	1.03601835234824e-26	-0.184045067548706	0.514	0.587	3.47459835010553e-22	pre-VDZ, non-responders vs responders (responders as reference)
PBMCs	scRNAseq	monocytes	MAP4K4	1.03736241772973e-26	-0.180358911029213	0.407	0.488	3.47910607658197e-22	pre-VDZ, non-responders vs responders (responders as reference)
PBMCs	scRNAseq	monocytes	UCP2	1.11297744485652e-26	-0.168508722984971	0.431	0.517	3.73270375455979e-22	pre-VDZ, non-responders vs responders (responders as reference)
PBMCs	scRNAseq	monocytes	PPTC7	1.18486141704286e-26	-0.152145305215403	0.321	0.405	3.97378822047836e-22	pre-VDZ, non-responders vs responders (responders as reference)
PBMCs	scRNAseq	monocytes	CLEC2B	1.23451395316605e-26	-0.117548710800968	0.435	0.527	4.14031289612829e-22	pre-VDZ, non-responders vs responders (responders as reference)
PBMCs	scRNAseq	monocytes	GADD45A	1.34543979843875e-26	-0.156364355614121	0.119	0.175	4.51233599600387e-22	pre-VDZ, non-responders vs responders (responders as reference)
PBMCs	scRNAseq	monocytes	KLHL24	2.10260313481844e-26	-0.141544510317591	0.21	0.282	7.05171039355409e-22	pre-VDZ, non-responders vs responders (responders as reference)
PBMCs	scRNAseq	monocytes	TMOD3	2.28764239205385e-26	-0.167696711600208	0.373	0.449	7.67229505447021e-22	pre-VDZ, non-responders vs responders (responders as reference)
PBMCs	scRNAseq	monocytes	MALAT1	2.34492820182064e-26	-0.206834303726059	0.998	0.999	7.86442020326607e-22	pre-VDZ, non-responders vs responders (responders as reference)
PBMCs	scRNAseq	monocytes	RAD21	2.39964840658484e-26	-0.164849774676591	0.425	0.499	8.04794082600425e-22	pre-VDZ, non-responders vs responders (responders as reference)
PBMCs	scRNAseq	monocytes	EEF1A1	2.82040370805353e-26	-0.212828904641655	0.975	0.986	9.45906995606993e-22	pre-VDZ, non-responders vs responders (responders as reference)
PBMCs	scRNAseq	monocytes	NR4A2	2.92159098546786e-26	0.232646957750178	0.508	0.419	9.79843184706212e-22	pre-VDZ, non-responders vs responders (responders as reference)
PBMCs	scRNAseq	monocytes	RPSA	3.57061640897393e-26	-0.244319964405022	0.777	0.818	1.19751333124168e-21	pre-VDZ, non-responders vs responders (responders as reference)
PBMCs	scRNAseq	monocytes	FCHO2	3.60569133464326e-26	-0.100953069467015	0.1	0.158	1.20927675981266e-21	pre-VDZ, non-responders vs responders (responders as reference)
PBMCs	scRNAseq	monocytes	EIF1B	3.90487702182366e-26	-0.186008281819974	0.444	0.506	1.30961765557922e-21	pre-VDZ, non-responders vs responders (responders as reference)
PBMCs	scRNAseq	monocytes	NUFIP2	4.57512465775625e-26	-0.18547424781287	0.548	0.605	1.53440530771829e-21	pre-VDZ, non-responders vs responders (responders as reference)
PBMCs	scRNAseq	monocytes	LCP1	4.61871497353824e-26	0.0210462157655562	0.816	0.873	1.54902462782525e-21	pre-VDZ, non-responders vs responders (responders as reference)
PBMCs	scRNAseq	monocytes	FGR	5.51315418068688e-26	-0.146122898556484	0.528	0.617	1.84900164911877e-21	pre-VDZ, non-responders vs responders (responders as reference)
PBMCs	scRNAseq	monocytes	CAPN2	6.23835222749058e-26	-0.180578975330647	0.567	0.637	2.09221857005579e-21	pre-VDZ, non-responders vs responders (responders as reference)
PBMCs	scRNAseq	monocytes	FOXP1	6.44239520210792e-26	-0.187716217080798	0.439	0.522	2.16065050288295e-21	pre-VDZ, non-responders vs responders (responders as reference)
PBMCs	scRNAseq	monocytes	PIK3R5	7.33022605146805e-26	-0.159614630362704	0.304	0.381	2.45841121314135e-21	pre-VDZ, non-responders vs responders (responders as reference)
PBMCs	scRNAseq	monocytes	HIST2H2AC	9.41558320153643e-26	-0.116874521945011	0.132	0.199	3.15779829413129e-21	pre-VDZ, non-responders vs responders (responders as reference)
PBMCs	scRNAseq	monocytes	MS4A7	1.01820194641262e-25	-0.246930731573091	0.728	0.781	3.41484568787866e-21	pre-VDZ, non-responders vs responders (responders as reference)
PBMCs	scRNAseq	monocytes	RALGDS	1.08756502966863e-25	-0.14405819697727	0.245	0.315	3.64747559650265e-21	pre-VDZ, non-responders vs responders (responders as reference)
PBMCs	scRNAseq	monocytes	CDC42	1.13940522306328e-25	-0.165452619527838	0.832	0.884	3.82133723710964e-21	pre-VDZ, non-responders vs responders (responders as reference)
PBMCs	scRNAseq	monocytes	SLC6A6	1.2062612821528e-25	-0.1790708802539	0.492	0.567	4.04555908808406e-21	pre-VDZ, non-responders vs responders (responders as reference)
PBMCs	scRNAseq	monocytes	AC096667.1	1.40836378534248e-25	-0.132384005910073	0.207	0.272	4.7233704632816e-21	pre-VDZ, non-responders vs responders (responders as reference)
PBMCs	scRNAseq	monocytes	HIPK2	1.44353084425039e-25	-0.144999269879116	0.207	0.282	4.84131374544697e-21	pre-VDZ, non-responders vs responders (responders as reference)
PBMCs	scRNAseq	monocytes	MZT2B	1.52463969723906e-25	-0.143430574479377	0.344	0.429	5.11333661660034e-21	pre-VDZ, non-responders vs responders (responders as reference)
PBMCs	scRNAseq	monocytes	ATP1B3	1.94626612655665e-25	0.228165423014754	0.699	0.67	6.5273873352457e-21	pre-VDZ, non-responders vs responders (responders as reference)
PBMCs	scRNAseq	monocytes	RPS4Y1	2.15712063935261e-25	0.181538072510396	0.523	0.432	7.23455120026078e-21	pre-VDZ, non-responders vs responders (responders as reference)
PBMCs	scRNAseq	monocytes	MIR3945HG	2.26089215708076e-25	-0.102829781224412	0.056	0.103	7.58258011641747e-21	pre-VDZ, non-responders vs responders (responders as reference)
PBMCs	scRNAseq	monocytes	ZNF106	2.26490386287877e-25	-0.153288987886846	0.403	0.49	7.59603457532282e-21	pre-VDZ, non-responders vs responders (responders as reference)
PBMCs	scRNAseq	monocytes	TGFBR1	2.34404416551569e-25	-0.128831871930085	0.191	0.263	7.86145532230654e-21	pre-VDZ, non-responders vs responders (responders as reference)
PBMCs	scRNAseq	monocytes	MSL1	2.67706171216838e-25	-0.116965371718891	0.17	0.237	8.97832957027032e-21	pre-VDZ, non-responders vs responders (responders as reference)
PBMCs	scRNAseq	monocytes	CTTNBP2NL	2.82901371636757e-25	-0.0919836563946391	0.072	0.125	9.48794620195356e-21	pre-VDZ, non-responders vs responders (responders as reference)
PBMCs	scRNAseq	monocytes	IL10RA	3.22289439533475e-25	-0.161199512626146	0.517	0.596	1.08089432230737e-20	pre-VDZ, non-responders vs responders (responders as reference)
PBMCs	scRNAseq	monocytes	NOP53	3.85419795829831e-25	-0.180554760066076	0.542	0.612	1.29262091125409e-20	pre-VDZ, non-responders vs responders (responders as reference)
PBMCs	scRNAseq	monocytes	VAMP5	4.08800288438725e-25	0.187265642660144	0.432	0.42	1.3710344073658e-20	pre-VDZ, non-responders vs responders (responders as reference)
PBMCs	scRNAseq	monocytes	PLEC	4.29925788040207e-25	-0.203076551900452	0.636	0.7	1.44188510792924e-20	pre-VDZ, non-responders vs responders (responders as reference)
PBMCs	scRNAseq	monocytes	FCGR1B	4.58235159583384e-25	0.0936816597420916	0.127	0.094	1.53682907821075e-20	pre-VDZ, non-responders vs responders (responders as reference)
PBMCs	scRNAseq	monocytes	C5orf24	4.60802043008401e-25	-0.116990894943189	0.141	0.201	1.54543789184158e-20	pre-VDZ, non-responders vs responders (responders as reference)
PBMCs	scRNAseq	monocytes	LITAF	4.7737887386819e-25	-0.0128422385912645	0.557	0.632	1.60103326717913e-20	pre-VDZ, non-responders vs responders (responders as reference)
PBMCs	scRNAseq	monocytes	ZRANB2	4.83269107410665e-25	-0.134255580812885	0.258	0.331	1.62078793243389e-20	pre-VDZ, non-responders vs responders (responders as reference)
PBMCs	scRNAseq	monocytes	OAF	5.21549422043561e-25	-0.145859493261214	0.219	0.285	1.7491724516497e-20	pre-VDZ, non-responders vs responders (responders as reference)
PBMCs	scRNAseq	monocytes	AGTPBP1	5.36236630656837e-25	-0.141089359857855	0.308	0.375	1.7984304118969e-20	pre-VDZ, non-responders vs responders (responders as reference)
PBMCs	scRNAseq	monocytes	MUC20-OT1	6.03351430941825e-25	-0.137467157196416	0.232	0.307	2.02352002909269e-20	pre-VDZ, non-responders vs responders (responders as reference)
PBMCs	scRNAseq	monocytes	SGTB	7.69527366600424e-25	-0.104236897402519	0.099	0.157	2.5808408821045e-20	pre-VDZ, non-responders vs responders (responders as reference)
PBMCs	scRNAseq	monocytes	PNPLA8	7.71761502152367e-25	-0.205903135771465	0.648	0.695	2.58833372591861e-20	pre-VDZ, non-responders vs responders (responders as reference)
PBMCs	scRNAseq	monocytes	CSTA	7.91175463141321e-25	-0.190879203671985	0.575	0.647	2.65344426828336e-20	pre-VDZ, non-responders vs responders (responders as reference)
PBMCs	scRNAseq	monocytes	SCAF11	8.17347317115042e-25	-0.171059220570741	0.549	0.629	2.74121943214043e-20	pre-VDZ, non-responders vs responders (responders as reference)
PBMCs	scRNAseq	monocytes	PHLDA1	9.90877257193894e-25	-0.249573425897977	0.481	0.557	3.32320414517688e-20	pre-VDZ, non-responders vs responders (responders as reference)
PBMCs	scRNAseq	monocytes	MAFG	1.11069533219308e-24	-0.171150995111725	0.457	0.53	3.72505000510916e-20	pre-VDZ, non-responders vs responders (responders as reference)
PBMCs	scRNAseq	monocytes	CTSD	1.12490634787271e-24	-0.139885622204562	0.609	0.694	3.77271090949551e-20	pre-VDZ, non-responders vs responders (responders as reference)
PBMCs	scRNAseq	monocytes	VEGFA	1.18330898523692e-24	0.263934771883795	0.585	0.513	3.96858167468759e-20	pre-VDZ, non-responders vs responders (responders as reference)
PBMCs	scRNAseq	monocytes	HBP1	1.46458026966568e-24	-0.161395822796846	0.479	0.553	4.91190930840476e-20	pre-VDZ, non-responders vs responders (responders as reference)
PBMCs	scRNAseq	monocytes	SLC11A2	1.60455966479127e-24	-0.109712767706661	0.118	0.18	5.38137220377696e-20	pre-VDZ, non-responders vs responders (responders as reference)
PBMCs	scRNAseq	monocytes	ATXN1	2.16300900775783e-24	-0.171382150210539	0.457	0.53	7.25429961021822e-20	pre-VDZ, non-responders vs responders (responders as reference)
PBMCs	scRNAseq	monocytes	ATP2B1	2.20796406059153e-24	-0.207588235484931	0.93	0.943	7.40506986641187e-20	pre-VDZ, non-responders vs responders (responders as reference)
PBMCs	scRNAseq	monocytes	EP300	2.31188575063057e-24	-0.165353711032911	0.517	0.583	7.75360243046482e-20	pre-VDZ, non-responders vs responders (responders as reference)
PBMCs	scRNAseq	monocytes	AMPD3	2.55085160478442e-24	-0.101651024038977	0.1	0.156	8.55504611212597e-20	pre-VDZ, non-responders vs responders (responders as reference)
PBMCs	scRNAseq	monocytes	ATF4	2.66680159979425e-24	-0.176202831871074	0.541	0.612	8.94391920538996e-20	pre-VDZ, non-responders vs responders (responders as reference)
PBMCs	scRNAseq	monocytes	TNFAIP3	2.67897059092086e-24	-0.317845037512604	0.458	0.523	8.98473156783037e-20	pre-VDZ, non-responders vs responders (responders as reference)
PBMCs	scRNAseq	monocytes	CCT4	2.84487839920052e-24	-0.124609320395303	0.22	0.295	9.54115317523871e-20	pre-VDZ, non-responders vs responders (responders as reference)
PBMCs	scRNAseq	monocytes	TNIP1	2.86663981242146e-24	-0.163392985563849	0.337	0.412	9.6141366028991e-20	pre-VDZ, non-responders vs responders (responders as reference)
PBMCs	scRNAseq	monocytes	TAP1	2.99019378367303e-24	0.116197801846576	0.271	0.246	1.00285119116826e-19	pre-VDZ, non-responders vs responders (responders as reference)
PBMCs	scRNAseq	monocytes	HNRNPK	3.35038818054777e-24	-0.163590732065437	0.694	0.762	1.12365318799211e-19	pre-VDZ, non-responders vs responders (responders as reference)
PBMCs	scRNAseq	monocytes	RPL30	3.52311078241101e-24	-0.216088794778141	0.906	0.935	1.181580894205e-19	pre-VDZ, non-responders vs responders (responders as reference)
PBMCs	scRNAseq	monocytes	CSDE1	3.61520079049855e-24	-0.164072851450911	0.67	0.741	1.2124660411174e-19	pre-VDZ, non-responders vs responders (responders as reference)
PBMCs	scRNAseq	monocytes	NPEPPS	3.91045336340253e-24	-0.127107857673457	0.222	0.286	1.31148784901794e-19	pre-VDZ, non-responders vs responders (responders as reference)
PBMCs	scRNAseq	monocytes	PNN	4.3096856372369e-24	-0.155376959718597	0.371	0.443	1.44538236901651e-19	pre-VDZ, non-responders vs responders (responders as reference)
PBMCs	scRNAseq	monocytes	NRIP1	4.33475489808766e-24	-0.207705174615424	0.433	0.5	1.45379009772064e-19	pre-VDZ, non-responders vs responders (responders as reference)
PBMCs	scRNAseq	monocytes	UQCRB	4.52931020993754e-24	-0.173383218769227	0.634	0.709	1.51904005820885e-19	pre-VDZ, non-responders vs responders (responders as reference)
PBMCs	scRNAseq	monocytes	SLC38A2	4.67790988448277e-24	-0.177178579970361	0.533	0.605	1.56887741705783e-19	pre-VDZ, non-responders vs responders (responders as reference)
PBMCs	scRNAseq	monocytes	FBXL3	5.55384806664676e-24	-0.13538841750998	0.277	0.353	1.86264956459199e-19	pre-VDZ, non-responders vs responders (responders as reference)
PBMCs	scRNAseq	monocytes	NFAT5	6.19594248376049e-24	-0.170117105292818	0.407	0.484	2.07799519020359e-19	pre-VDZ, non-responders vs responders (responders as reference)
PBMCs	scRNAseq	monocytes	ZCCHC2	6.76512563507219e-24	-0.144437776168154	0.209	0.276	2.26888783549051e-19	pre-VDZ, non-responders vs responders (responders as reference)
PBMCs	scRNAseq	monocytes	EEF2	6.78685390538653e-24	-0.196623491019304	0.733	0.788	2.27617506278853e-19	pre-VDZ, non-responders vs responders (responders as reference)
PBMCs	scRNAseq	monocytes	NIPBL	7.55176687235602e-24	-0.158735765185837	0.485	0.565	2.53271157365076e-19	pre-VDZ, non-responders vs responders (responders as reference)
PBMCs	scRNAseq	monocytes	NCL	8.60517774008505e-24	-0.198036512008928	0.631	0.69	2.88600451046972e-19	pre-VDZ, non-responders vs responders (responders as reference)
PBMCs	scRNAseq	monocytes	SMCHD1	9.96691596655902e-24	-0.190081322633996	0.664	0.716	3.34270427686457e-19	pre-VDZ, non-responders vs responders (responders as reference)
PBMCs	scRNAseq	monocytes	STAG2	9.98126951220148e-24	-0.146321150402157	0.405	0.49	3.34751816900213e-19	pre-VDZ, non-responders vs responders (responders as reference)
PBMCs	scRNAseq	monocytes	FGD4	1.33238789586977e-23	-0.149669967536181	0.347	0.386	4.46856252516803e-19	pre-VDZ, non-responders vs responders (responders as reference)
PBMCs	scRNAseq	monocytes	FERMT3	1.35240807730245e-23	-0.135434553725639	0.451	0.538	4.53570620965696e-19	pre-VDZ, non-responders vs responders (responders as reference)
PBMCs	scRNAseq	monocytes	PANK3	1.37246371605852e-23	-0.123972321429271	0.199	0.265	4.60296881091706e-19	pre-VDZ, non-responders vs responders (responders as reference)
PBMCs	scRNAseq	monocytes	OSBPL11	1.47888326137265e-23	-0.133625815146339	0.271	0.343	4.95987868199161e-19	pre-VDZ, non-responders vs responders (responders as reference)
PBMCs	scRNAseq	monocytes	LRRFIP1	1.57412124211485e-23	-0.19534418490502	0.9	0.931	5.27928782180478e-19	pre-VDZ, non-responders vs responders (responders as reference)
PBMCs	scRNAseq	monocytes	HMGA1	1.67843027960383e-23	-0.17188566826542	0.478	0.561	5.62911947173534e-19	pre-VDZ, non-responders vs responders (responders as reference)
PBMCs	scRNAseq	monocytes	RPL14	1.83736362642956e-23	-0.217131665383985	0.842	0.88	6.16215013031947e-19	pre-VDZ, non-responders vs responders (responders as reference)
PBMCs	scRNAseq	monocytes	PTEN	1.9592617034618e-23	-0.1440160646458	0.4	0.483	6.5709719010702e-19	pre-VDZ, non-responders vs responders (responders as reference)
PBMCs	scRNAseq	monocytes	PDE4B	1.9691190323763e-23	0.0864641141323392	0.527	0.443	6.60403141078364e-19	pre-VDZ, non-responders vs responders (responders as reference)
PBMCs	scRNAseq	monocytes	FBXL5	2.19043851081091e-23	-0.131644480366482	0.298	0.376	7.34629267755764e-19	pre-VDZ, non-responders vs responders (responders as reference)
PBMCs	scRNAseq	monocytes	KLF13	2.31010488457308e-23	-0.169189064067562	0.547	0.624	7.74762976188121e-19	pre-VDZ, non-responders vs responders (responders as reference)
PBMCs	scRNAseq	monocytes	TPD52L2	3.00099291832893e-23	-0.136236004387191	0.318	0.389	1.00647300494916e-18	pre-VDZ, non-responders vs responders (responders as reference)
PBMCs	scRNAseq	monocytes	A1BG	3.2172148901688e-23	-0.0941491933297849	0.109	0.165	1.07898952986481e-18	pre-VDZ, non-responders vs responders (responders as reference)
PBMCs	scRNAseq	monocytes	FCGR2A	3.43310081495838e-23	-0.0539737027756879	0.528	0.606	1.15139335132074e-18	pre-VDZ, non-responders vs responders (responders as reference)
PBMCs	scRNAseq	monocytes	RBBP8	3.80615641765812e-23	0.12854175150767	0.213	0.17	1.27650873935418e-18	pre-VDZ, non-responders vs responders (responders as reference)
PBMCs	scRNAseq	monocytes	AHSA1	4.11902252243182e-23	-0.0892224353658412	0.083	0.132	1.38143777357318e-18	pre-VDZ, non-responders vs responders (responders as reference)
PBMCs	scRNAseq	monocytes	TGFBI	4.37854459042951e-23	-0.161149965047855	0.379	0.451	1.46847628473825e-18	pre-VDZ, non-responders vs responders (responders as reference)
PBMCs	scRNAseq	monocytes	HLA-DPB1	4.68875100006889e-23	0.317743690448079	0.726	0.691	1.5725133104031e-18	pre-VDZ, non-responders vs responders (responders as reference)
PBMCs	scRNAseq	monocytes	STX3	4.85950152102578e-23	-0.119145672375627	0.173	0.24	1.62977962012163e-18	pre-VDZ, non-responders vs responders (responders as reference)
PBMCs	scRNAseq	monocytes	TNFAIP6	5.11170327595803e-23	-0.271900310174722	0.221	0.279	1.7143630446908e-18	pre-VDZ, non-responders vs responders (responders as reference)
PBMCs	scRNAseq	monocytes	RIPOR2	5.75100188020994e-23	-0.151531360567553	0.335	0.413	1.92877101058481e-18	pre-VDZ, non-responders vs responders (responders as reference)
PBMCs	scRNAseq	monocytes	SYNJ2	6.14005605401633e-23	-0.163225955390503	0.242	0.314	2.059251999396e-18	pre-VDZ, non-responders vs responders (responders as reference)
PBMCs	scRNAseq	monocytes	HES4	6.26954731107683e-23	0.159760065883556	0.129	0.083	2.10268077718895e-18	pre-VDZ, non-responders vs responders (responders as reference)
PBMCs	scRNAseq	monocytes	UBR2	6.33242481551376e-23	-0.11772003688106	0.199	0.268	2.123768634627e-18	pre-VDZ, non-responders vs responders (responders as reference)
PBMCs	scRNAseq	monocytes	COX6B1	6.5109936928263e-23	-0.144624220027313	0.611	0.689	2.18365706470008e-18	pre-VDZ, non-responders vs responders (responders as reference)
PBMCs	scRNAseq	monocytes	HMGB1	6.58551067825244e-23	-0.17206448656648	0.761	0.817	2.2086485712723e-18	pre-VDZ, non-responders vs responders (responders as reference)
PBMCs	scRNAseq	monocytes	SLK	7.39656058104556e-23	-0.152041161322307	0.329	0.402	2.48065848767106e-18	pre-VDZ, non-responders vs responders (responders as reference)
PBMCs	scRNAseq	monocytes	CIR1	8.54119188355762e-23	-0.132526105064236	0.279	0.357	2.86454493390756e-18	pre-VDZ, non-responders vs responders (responders as reference)
PBMCs	scRNAseq	monocytes	ACTR3	8.57127444186691e-23	-0.110253942332811	0.694	0.77	2.87463402231332e-18	pre-VDZ, non-responders vs responders (responders as reference)
PBMCs	scRNAseq	monocytes	EHD1	8.65809422140664e-23	-0.183169917975798	0.478	0.552	2.90375163997536e-18	pre-VDZ, non-responders vs responders (responders as reference)
PBMCs	scRNAseq	monocytes	AVPI1	8.71373243404963e-23	0.0927331805499446	0.133	0.082	2.92241158373157e-18	pre-VDZ, non-responders vs responders (responders as reference)
PBMCs	scRNAseq	monocytes	SFPQ	9.20087284290916e-23	-0.187693543730725	0.768	0.799	3.08578873405487e-18	pre-VDZ, non-responders vs responders (responders as reference)
PBMCs	scRNAseq	monocytes	LRRFIP2	9.25842614920944e-23	-0.149486868868735	0.327	0.397	3.10509096192186e-18	pre-VDZ, non-responders vs responders (responders as reference)
PBMCs	scRNAseq	monocytes	PIM1	1.05191410836128e-22	-0.127606769352997	0.275	0.355	3.52790953662205e-18	pre-VDZ, non-responders vs responders (responders as reference)
PBMCs	scRNAseq	monocytes	SWAP70	1.06039486827354e-22	-0.134075416263847	0.251	0.327	3.55635230921579e-18	pre-VDZ, non-responders vs responders (responders as reference)
PBMCs	scRNAseq	monocytes	ZADH2	1.08981386669014e-22	-0.0949029163658994	0.109	0.165	3.65501774610539e-18	pre-VDZ, non-responders vs responders (responders as reference)
PBMCs	scRNAseq	monocytes	ID2	1.1022977724068e-22	-0.239736974048294	0.73	0.78	3.69688626909794e-18	pre-VDZ, non-responders vs responders (responders as reference)
PBMCs	scRNAseq	monocytes	ST3GAL6	1.12662572415242e-22	-0.109903696343682	0.132	0.193	3.7784773536624e-18	pre-VDZ, non-responders vs responders (responders as reference)
PBMCs	scRNAseq	monocytes	TRIR	1.13161811382061e-22	-0.162572050994665	0.658	0.715	3.79522083013156e-18	pre-VDZ, non-responders vs responders (responders as reference)
PBMCs	scRNAseq	monocytes	TMEM176A	1.17223914395101e-22	0.135894525368505	0.353	0.274	3.93145564098289e-18	pre-VDZ, non-responders vs responders (responders as reference)
PBMCs	scRNAseq	monocytes	SPOP	1.17671626186301e-22	-0.107187004953892	0.16	0.222	3.94647099903616e-18	pre-VDZ, non-responders vs responders (responders as reference)
PBMCs	scRNAseq	monocytes	SLC25A13	1.22195178443151e-22	-0.0846432787967234	0.078	0.128	4.09818189462641e-18	pre-VDZ, non-responders vs responders (responders as reference)
PBMCs	scRNAseq	monocytes	MYADM	1.25292784308272e-22	-0.230937523988096	0.836	0.873	4.20206940013083e-18	pre-VDZ, non-responders vs responders (responders as reference)
PBMCs	scRNAseq	monocytes	AES	1.45310093486571e-22	-0.143162728169304	0.327	0.402	4.87340991535261e-18	pre-VDZ, non-responders vs responders (responders as reference)
PBMCs	scRNAseq	monocytes	POMP	1.46737579781729e-22	0.0910657722416697	0.568	0.589	4.92128495071964e-18	pre-VDZ, non-responders vs responders (responders as reference)
PBMCs	scRNAseq	monocytes	WIPF1	1.63166468772214e-22	-0.134919173110122	0.462	0.547	5.47227702968251e-18	pre-VDZ, non-responders vs responders (responders as reference)
PBMCs	scRNAseq	monocytes	UBE2L6	1.66195244685431e-22	0.116495649521071	0.327	0.306	5.57385611626e-18	pre-VDZ, non-responders vs responders (responders as reference)
PBMCs	scRNAseq	monocytes	CCDC85B	1.68127207041178e-22	-0.120187341443107	0.257	0.333	5.63865026974702e-18	pre-VDZ, non-responders vs responders (responders as reference)
PBMCs	scRNAseq	monocytes	RPS6	1.73847438190486e-22	-0.220342771595646	0.902	0.929	5.83049538203252e-18	pre-VDZ, non-responders vs responders (responders as reference)
PBMCs	scRNAseq	monocytes	SREK1	1.81175246427193e-22	-0.134959492173579	0.302	0.381	6.07625541467519e-18	pre-VDZ, non-responders vs responders (responders as reference)
PBMCs	scRNAseq	monocytes	APOBR	1.93087891831242e-22	-0.134120773485114	0.267	0.34	6.4757817162362e-18	pre-VDZ, non-responders vs responders (responders as reference)
PBMCs	scRNAseq	monocytes	METTL9	1.94523908034172e-22	-0.182556098243424	0.561	0.626	6.52394282765005e-18	pre-VDZ, non-responders vs responders (responders as reference)
PBMCs	scRNAseq	monocytes	DIAPH1	2.02076901591041e-22	-0.175601724075019	0.695	0.744	6.77725512556032e-18	pre-VDZ, non-responders vs responders (responders as reference)
PBMCs	scRNAseq	monocytes	ANPEP	2.10697676745365e-22	-0.207534275417575	0.56	0.631	7.06637868268606e-18	pre-VDZ, non-responders vs responders (responders as reference)
PBMCs	scRNAseq	monocytes	CLMN	2.19100010340294e-22	-0.142092283913665	0.222	0.28	7.34817614679276e-18	pre-VDZ, non-responders vs responders (responders as reference)
PBMCs	scRNAseq	monocytes	CD55	2.63250913741788e-22	-0.173942950022776	0.791	0.841	8.82890914507209e-18	pre-VDZ, non-responders vs responders (responders as reference)
PBMCs	scRNAseq	monocytes	SLC44A1	2.67617065966164e-22	-0.157272389998643	0.231	0.296	8.97534115837319e-18	pre-VDZ, non-responders vs responders (responders as reference)
PBMCs	scRNAseq	monocytes	ITGB2	2.6835953928455e-22	-0.0685730175520585	0.758	0.827	9.00024222852525e-18	pre-VDZ, non-responders vs responders (responders as reference)
PBMCs	scRNAseq	monocytes	FNIP2	3.07790967942978e-22	-0.157829825043191	0.267	0.345	1.03226934828716e-17	pre-VDZ, non-responders vs responders (responders as reference)
PBMCs	scRNAseq	monocytes	SLTM	3.15145931513576e-22	-0.148879650509771	0.384	0.453	1.05693642511023e-17	pre-VDZ, non-responders vs responders (responders as reference)
PBMCs	scRNAseq	monocytes	CLTC	3.29770613683241e-22	-0.13944557793833	0.436	0.517	1.10598468417085e-17	pre-VDZ, non-responders vs responders (responders as reference)
PBMCs	scRNAseq	monocytes	NOP10	3.99597095152705e-22	-0.141752414306742	0.543	0.622	1.34016873772314e-17	pre-VDZ, non-responders vs responders (responders as reference)
PBMCs	scRNAseq	monocytes	DNAJC7	4.00320364724174e-22	-0.139160002666135	0.448	0.528	1.34259443921193e-17	pre-VDZ, non-responders vs responders (responders as reference)
PBMCs	scRNAseq	monocytes	WSB1	4.01244241801242e-22	-0.167952535504769	0.715	0.75	1.345692938153e-17	pre-VDZ, non-responders vs responders (responders as reference)
PBMCs	scRNAseq	monocytes	WASF2	4.18170334344858e-22	-0.166089718796465	0.583	0.652	1.40245966732579e-17	pre-VDZ, non-responders vs responders (responders as reference)
PBMCs	scRNAseq	monocytes	ATP5MPL	5.34920540788728e-22	-0.152691389093311	0.537	0.607	1.79401650969724e-17	pre-VDZ, non-responders vs responders (responders as reference)
PBMCs	scRNAseq	monocytes	NXF1	5.82801232995755e-22	-0.139101501077283	0.313	0.379	1.95459877522116e-17	pre-VDZ, non-responders vs responders (responders as reference)
PBMCs	scRNAseq	monocytes	SERPINB8	6.05797566768083e-22	-0.157759986548012	0.431	0.488	2.0317238794268e-17	pre-VDZ, non-responders vs responders (responders as reference)
PBMCs	scRNAseq	monocytes	RHOG	7.17987738763695e-22	-0.125425870393054	0.52	0.604	2.40798727826568e-17	pre-VDZ, non-responders vs responders (responders as reference)
PBMCs	scRNAseq	monocytes	RBM33	8.04324657613938e-22	-0.131941238880105	0.302	0.369	2.69754403670563e-17	pre-VDZ, non-responders vs responders (responders as reference)
PBMCs	scRNAseq	monocytes	CCT5	8.35785186651485e-22	-0.149606355640227	0.439	0.514	2.80305635899175e-17	pre-VDZ, non-responders vs responders (responders as reference)
PBMCs	scRNAseq	monocytes	REST	8.36802047905687e-22	-0.18046158005259	0.418	0.483	2.80646670826609e-17	pre-VDZ, non-responders vs responders (responders as reference)
PBMCs	scRNAseq	monocytes	BRD4	8.69887081010493e-22	-0.154111575213367	0.494	0.557	2.91742729229299e-17	pre-VDZ, non-responders vs responders (responders as reference)
PBMCs	scRNAseq	monocytes	NDUFS2	9.33121004864644e-22	-0.0841813020011751	0.099	0.151	3.12950122611504e-17	pre-VDZ, non-responders vs responders (responders as reference)
PBMCs	scRNAseq	monocytes	MAP1LC3B	9.57689439020836e-22	-0.185457559139512	0.663	0.725	3.21189884058808e-17	pre-VDZ, non-responders vs responders (responders as reference)
PBMCs	scRNAseq	monocytes	IL18	9.68724410698463e-22	-0.107622027098303	0.094	0.145	3.24890792860051e-17	pre-VDZ, non-responders vs responders (responders as reference)
PBMCs	scRNAseq	monocytes	UBR4	9.76723901448596e-22	-0.138989000803262	0.363	0.437	3.2757366206783e-17	pre-VDZ, non-responders vs responders (responders as reference)
PBMCs	scRNAseq	monocytes	EEF1D	1.06201908447832e-21	-0.168649136310061	0.833	0.868	3.5617996055234e-17	pre-VDZ, non-responders vs responders (responders as reference)
PBMCs	scRNAseq	monocytes	SMAD4	1.10195491103897e-21	-0.104806340747833	0.161	0.224	3.69573638064249e-17	pre-VDZ, non-responders vs responders (responders as reference)
PBMCs	scRNAseq	monocytes	LYN	1.16832023135502e-21	-0.100611376094337	0.733	0.803	3.91831239191846e-17	pre-VDZ, non-responders vs responders (responders as reference)
PBMCs	scRNAseq	monocytes	ARHGEF40	1.17429163991559e-21	-0.128468790946686	0.223	0.292	3.9383393019489e-17	pre-VDZ, non-responders vs responders (responders as reference)
PBMCs	scRNAseq	monocytes	MORF4L1	1.20423048045505e-21	-0.15834639605246	0.687	0.745	4.03874818535014e-17	pre-VDZ, non-responders vs responders (responders as reference)
PBMCs	scRNAseq	monocytes	HLA-DPA1	1.22799017032073e-21	0.292432088165649	0.673	0.658	4.11843343322165e-17	pre-VDZ, non-responders vs responders (responders as reference)
PBMCs	scRNAseq	monocytes	BST2	1.34396707130991e-21	0.124534774937498	0.54	0.524	4.50739676375917e-17	pre-VDZ, non-responders vs responders (responders as reference)
PBMCs	scRNAseq	monocytes	CGGBP1	1.53166788095591e-21	-0.124146442402707	0.288	0.362	5.13690773914994e-17	pre-VDZ, non-responders vs responders (responders as reference)
PBMCs	scRNAseq	monocytes	TKT	1.5997008278398e-21	-0.144330627802911	0.781	0.842	5.36507663640911e-17	pre-VDZ, non-responders vs responders (responders as reference)
PBMCs	scRNAseq	monocytes	HNRNPU	1.75143771695067e-21	-0.196576616295457	0.838	0.87	5.87397181510917e-17	pre-VDZ, non-responders vs responders (responders as reference)
PBMCs	scRNAseq	monocytes	TRIM56	1.76584784067174e-21	-0.139928837720436	0.313	0.389	5.92230048804489e-17	pre-VDZ, non-responders vs responders (responders as reference)
PBMCs	scRNAseq	monocytes	EIF3M	1.83147077243221e-21	-0.151078524209412	0.459	0.525	6.14238667658316e-17	pre-VDZ, non-responders vs responders (responders as reference)
PBMCs	scRNAseq	monocytes	EIF4G2	1.86147174293139e-21	-0.175700940587031	0.812	0.852	6.2430039314433e-17	pre-VDZ, non-responders vs responders (responders as reference)
PBMCs	scRNAseq	monocytes	LILRB2	1.8625449768822e-21	-0.108306088389514	0.546	0.628	6.24660334346753e-17	pre-VDZ, non-responders vs responders (responders as reference)
PBMCs	scRNAseq	monocytes	ITPRIPL2	1.95525515591401e-21	-0.17411663096378	0.38	0.445	6.55753474190441e-17	pre-VDZ, non-responders vs responders (responders as reference)
PBMCs	scRNAseq	monocytes	EDF1	1.98950220488663e-21	-0.148621990405689	0.579	0.649	6.67239249474878e-17	pre-VDZ, non-responders vs responders (responders as reference)
PBMCs	scRNAseq	monocytes	PTPRC	2.09312088547968e-21	-0.116903619562433	0.876	0.923	7.01990882572176e-17	pre-VDZ, non-responders vs responders (responders as reference)
PBMCs	scRNAseq	monocytes	SSH2	2.13061084414954e-21	-0.129055304933547	0.299	0.374	7.14564264910874e-17	pre-VDZ, non-responders vs responders (responders as reference)
PBMCs	scRNAseq	monocytes	NRGN	2.19722782589311e-21	-0.15331086623908	0.293	0.359	7.36906268248032e-17	pre-VDZ, non-responders vs responders (responders as reference)
PBMCs	scRNAseq	monocytes	VMP1	2.23106705782124e-21	-0.199535859582121	0.809	0.833	7.48255269852089e-17	pre-VDZ, non-responders vs responders (responders as reference)
PBMCs	scRNAseq	monocytes	HLA-C	2.37346007791249e-21	-0.156119581329475	0.916	0.948	7.96011040930291e-17	pre-VDZ, non-responders vs responders (responders as reference)
PBMCs	scRNAseq	monocytes	ATP6V1F	2.43375300689547e-21	-0.181545392541349	0.651	0.702	8.16232083452603e-17	pre-VDZ, non-responders vs responders (responders as reference)
PBMCs	scRNAseq	monocytes	CCDC82	2.64153700586683e-21	-0.11557851908389	0.175	0.233	8.85918681027618e-17	pre-VDZ, non-responders vs responders (responders as reference)
PBMCs	scRNAseq	monocytes	ETS2	2.93873844725233e-21	-0.192154069398959	0.404	0.458	9.85594100439487e-17	pre-VDZ, non-responders vs responders (responders as reference)
PBMCs	scRNAseq	monocytes	DUSP18	2.94397823082997e-21	-0.13224550554597	0.27	0.338	9.87351419055757e-17	pre-VDZ, non-responders vs responders (responders as reference)
PBMCs	scRNAseq	monocytes	RASSF2	3.03038300572771e-21	-0.158513391840999	0.473	0.537	1.01632985246096e-16	pre-VDZ, non-responders vs responders (responders as reference)
PBMCs	scRNAseq	monocytes	RBM5	3.10129168378457e-21	-0.147575331536091	0.493	0.555	1.04011120490767e-16	pre-VDZ, non-responders vs responders (responders as reference)
PBMCs	scRNAseq	monocytes	SERPINB1	3.72886832530436e-21	-0.15814885334473	0.781	0.839	1.25058785894058e-16	pre-VDZ, non-responders vs responders (responders as reference)
PBMCs	scRNAseq	monocytes	NCOA3	3.87945645336517e-21	-0.146944347115844	0.318	0.38	1.30109210532961e-16	pre-VDZ, non-responders vs responders (responders as reference)
PBMCs	scRNAseq	monocytes	USP3	4.06782870836612e-21	-0.1625816845071	0.662	0.714	1.36426839221183e-16	pre-VDZ, non-responders vs responders (responders as reference)
PBMCs	scRNAseq	monocytes	CD68	4.29651038866989e-21	-0.144654297822295	0.691	0.758	1.44096365415211e-16	pre-VDZ, non-responders vs responders (responders as reference)
PBMCs	scRNAseq	monocytes	RSL24D1	4.77082638365322e-21	-0.139076945076048	0.39	0.466	1.60003975254962e-16	pre-VDZ, non-responders vs responders (responders as reference)
PBMCs	scRNAseq	monocytes	PSME1	5.36424685416142e-21	0.0918905533247978	0.639	0.665	1.79906110994866e-16	pre-VDZ, non-responders vs responders (responders as reference)
PBMCs	scRNAseq	monocytes	H1FX	5.40541352944703e-21	-0.253148334231117	0.384	0.451	1.81286758950595e-16	pre-VDZ, non-responders vs responders (responders as reference)
PBMCs	scRNAseq	monocytes	YY1	5.63875533365817e-21	-0.153124982323959	0.477	0.546	1.89112576380228e-16	pre-VDZ, non-responders vs responders (responders as reference)
PBMCs	scRNAseq	monocytes	HNRNPDL	7.47877048396166e-21	-0.15758572202115	0.637	0.698	2.50823004491106e-16	pre-VDZ, non-responders vs responders (responders as reference)
PBMCs	scRNAseq	monocytes	NACA	7.56500486978208e-21	-0.177803704547344	0.904	0.932	2.53715133322752e-16	pre-VDZ, non-responders vs responders (responders as reference)
PBMCs	scRNAseq	monocytes	PTGES3	7.77376935996928e-21	-0.162016140598803	0.573	0.635	2.6071667679465e-16	pre-VDZ, non-responders vs responders (responders as reference)
PBMCs	scRNAseq	monocytes	GGNBP2	8.61524741986725e-21	-0.143687575719313	0.428	0.499	2.88938167967508e-16	pre-VDZ, non-responders vs responders (responders as reference)
PBMCs	scRNAseq	monocytes	PUM1	1.08254251485592e-20	-0.131304306266905	0.329	0.393	3.63063108632377e-16	pre-VDZ, non-responders vs responders (responders as reference)
PBMCs	scRNAseq	monocytes	DCP2	1.12310137148452e-20	-0.136951119860854	0.378	0.447	3.7666573796848e-16	pre-VDZ, non-responders vs responders (responders as reference)
PBMCs	scRNAseq	monocytes	TAF1D	1.14230585212883e-20	-0.136626612312769	0.358	0.43	3.83106536686965e-16	pre-VDZ, non-responders vs responders (responders as reference)
PBMCs	scRNAseq	monocytes	PDIA3	1.17522980963069e-20	0.126801360744414	0.555	0.556	3.94148573553939e-16	pre-VDZ, non-responders vs responders (responders as reference)
PBMCs	scRNAseq	monocytes	VSIR	1.33965334415063e-20	-0.121590349129613	0.554	0.634	4.49292938561239e-16	pre-VDZ, non-responders vs responders (responders as reference)
PBMCs	scRNAseq	monocytes	NCOA4	1.45137924503022e-20	-0.141817108299447	0.455	0.533	4.86763571198235e-16	pre-VDZ, non-responders vs responders (responders as reference)
PBMCs	scRNAseq	monocytes	ELF1	1.46014645482192e-20	-0.161587206725398	0.754	0.803	4.89703918018176e-16	pre-VDZ, non-responders vs responders (responders as reference)
PBMCs	scRNAseq	monocytes	GOLGB1	1.61421557965282e-20	-0.179972847782064	0.493	0.538	5.41375621103962e-16	pre-VDZ, non-responders vs responders (responders as reference)
PBMCs	scRNAseq	monocytes	KANSL1	1.82473150819051e-20	-0.134193449538877	0.313	0.382	6.11978453216932e-16	pre-VDZ, non-responders vs responders (responders as reference)
PBMCs	scRNAseq	monocytes	USP47	1.89289347587857e-20	-0.129525801086067	0.28	0.348	6.34838613940156e-16	pre-VDZ, non-responders vs responders (responders as reference)
PBMCs	scRNAseq	monocytes	CNN2	2.05175805677085e-20	-0.123636437247411	0.265	0.336	6.88118617079809e-16	pre-VDZ, non-responders vs responders (responders as reference)
PBMCs	scRNAseq	monocytes	ARID4A	2.09706358654527e-20	-0.123238885299894	0.203	0.265	7.03313185655554e-16	pre-VDZ, non-responders vs responders (responders as reference)
PBMCs	scRNAseq	monocytes	SF3B1	2.12135597651909e-20	-0.153385589987682	0.637	0.692	7.11460367404974e-16	pre-VDZ, non-responders vs responders (responders as reference)
PBMCs	scRNAseq	monocytes	CHD2	2.13142464652833e-20	-0.155408385311517	0.499	0.556	7.14837197952673e-16	pre-VDZ, non-responders vs responders (responders as reference)
PBMCs	scRNAseq	monocytes	SERPINA1	2.38210815147598e-20	0.00256404458411219	0.748	0.805	7.98911431842014e-16	pre-VDZ, non-responders vs responders (responders as reference)
PBMCs	scRNAseq	monocytes	MED13	2.43630914078224e-20	-0.144478682215764	0.421	0.494	8.17089359635549e-16	pre-VDZ, non-responders vs responders (responders as reference)
PBMCs	scRNAseq	monocytes	MARK3	2.52974338761103e-20	-0.128808559675993	0.311	0.379	8.48425337336986e-16	pre-VDZ, non-responders vs responders (responders as reference)
PBMCs	scRNAseq	monocytes	SEC22B	2.56164457532814e-20	-0.151449443311687	0.374	0.431	8.59124357673553e-16	pre-VDZ, non-responders vs responders (responders as reference)
PBMCs	scRNAseq	monocytes	SUGT1	2.66551102040937e-20	-0.0973921318174241	0.149	0.211	8.93959086024894e-16	pre-VDZ, non-responders vs responders (responders as reference)
PBMCs	scRNAseq	monocytes	GPSM3	2.72213430886022e-20	-0.137902571358757	0.587	0.658	9.12949404505541e-16	pre-VDZ, non-responders vs responders (responders as reference)
PBMCs	scRNAseq	monocytes	USP7	2.77920755392751e-20	-0.13270799923223	0.341	0.406	9.32090629436207e-16	pre-VDZ, non-responders vs responders (responders as reference)
PBMCs	scRNAseq	monocytes	ZBTB44	3.15167415937082e-20	-0.114587949652612	0.173	0.228	1.05700847956978e-15	pre-VDZ, non-responders vs responders (responders as reference)
PBMCs	scRNAseq	monocytes	PRPF40A	3.18594994816376e-20	-0.149424056196179	0.488	0.555	1.06850389361516e-15	pre-VDZ, non-responders vs responders (responders as reference)
PBMCs	scRNAseq	monocytes	PFDN5	3.2470828435909e-20	-0.164176883684668	0.897	0.922	1.08900664408352e-15	pre-VDZ, non-responders vs responders (responders as reference)
PBMCs	scRNAseq	monocytes	PCMTD1	3.59931550861372e-20	-0.109207627445899	0.192	0.25	1.20713843527887e-15	pre-VDZ, non-responders vs responders (responders as reference)
PBMCs	scRNAseq	monocytes	PRMT2	3.63051800778698e-20	-0.124637542032836	0.265	0.327	1.2176031294516e-15	pre-VDZ, non-responders vs responders (responders as reference)
PBMCs	scRNAseq	monocytes	SAFB	3.80320475135947e-20	-0.108743786048213	0.211	0.275	1.27551880951094e-15	pre-VDZ, non-responders vs responders (responders as reference)
PBMCs	scRNAseq	monocytes	SLC30A1	4.00002278396796e-20	-0.0824114052772503	0.088	0.138	1.34152764128718e-15	pre-VDZ, non-responders vs responders (responders as reference)
PBMCs	scRNAseq	monocytes	FGFR1OP2	4.24403635996866e-20	-0.122446066248984	0.291	0.361	1.42336491440629e-15	pre-VDZ, non-responders vs responders (responders as reference)
PBMCs	scRNAseq	monocytes	COPS2	4.34156048283241e-20	-0.117382266249936	0.242	0.308	1.45607255473233e-15	pre-VDZ, non-responders vs responders (responders as reference)
PBMCs	scRNAseq	monocytes	HSPA1B	4.55308200691201e-20	-0.322907190149628	0.08	0.127	1.52701264347815e-15	pre-VDZ, non-responders vs responders (responders as reference)
PBMCs	scRNAseq	monocytes	PTPN12	5.16650067692607e-20	-0.142287232517568	0.35	0.421	1.73274099702746e-15	pre-VDZ, non-responders vs responders (responders as reference)
PBMCs	scRNAseq	monocytes	RFX1	5.50468192648263e-20	-0.102509089350431	0.165	0.223	1.84616022450374e-15	pre-VDZ, non-responders vs responders (responders as reference)
PBMCs	scRNAseq	monocytes	ATXN7L3B	5.74350598766598e-20	-0.134171223412538	0.277	0.341	1.92625703814342e-15	pre-VDZ, non-responders vs responders (responders as reference)
PBMCs	scRNAseq	monocytes	RIOK3	5.75025468295004e-20	-0.171366005766055	0.682	0.738	1.92852041556778e-15	pre-VDZ, non-responders vs responders (responders as reference)
PBMCs	scRNAseq	monocytes	TRMT6	6.15110342937785e-20	-0.153080314771363	0.37	0.426	2.06295706814474e-15	pre-VDZ, non-responders vs responders (responders as reference)
PBMCs	scRNAseq	monocytes	RPS10	6.64659838313266e-20	-0.178796310711048	0.623	0.691	2.22913616573503e-15	pre-VDZ, non-responders vs responders (responders as reference)
PBMCs	scRNAseq	monocytes	PDLIM7	6.6997639386666e-20	-0.1181135689748	0.231	0.294	2.24696682975e-15	pre-VDZ, non-responders vs responders (responders as reference)
PBMCs	scRNAseq	monocytes	SNHG7	6.96204173099812e-20	-0.111300810514564	0.201	0.262	2.33492955574215e-15	pre-VDZ, non-responders vs responders (responders as reference)
PBMCs	scRNAseq	monocytes	MORF4L2	7.37424061752037e-20	-0.126629276338304	0.327	0.381	2.47317281830398e-15	pre-VDZ, non-responders vs responders (responders as reference)
PBMCs	scRNAseq	monocytes	CD36	7.40801727993041e-20	0.141543272804118	0.45	0.44	2.48450083534306e-15	pre-VDZ, non-responders vs responders (responders as reference)
PBMCs	scRNAseq	monocytes	GAS7	7.79986777209379e-20	-0.160434846063745	0.461	0.53	2.61591965340482e-15	pre-VDZ, non-responders vs responders (responders as reference)
PBMCs	scRNAseq	monocytes	DEK	9.5586085238239e-20	-0.114567373853054	0.495	0.575	3.20576612672006e-15	pre-VDZ, non-responders vs responders (responders as reference)
PBMCs	scRNAseq	monocytes	FTL	1.11805103800659e-19	-0.177409908004657	0.974	0.983	3.74971957126652e-15	pre-VDZ, non-responders vs responders (responders as reference)
PBMCs	scRNAseq	monocytes	PSMA3-AS1	1.14800842850787e-19	-0.141286955698613	0.473	0.536	3.8501906675297e-15	pre-VDZ, non-responders vs responders (responders as reference)
PBMCs	scRNAseq	monocytes	RAPGEF2	1.25574024982381e-19	-0.131979705959282	0.251	0.312	4.21150164985909e-15	pre-VDZ, non-responders vs responders (responders as reference)
PBMCs	scRNAseq	monocytes	CR1	1.26350236786737e-19	0.103483084408203	0.2	0.173	4.23753424135357e-15	pre-VDZ, non-responders vs responders (responders as reference)
PBMCs	scRNAseq	monocytes	SPAG7	1.26496674135229e-19	-0.109342874045534	0.247	0.316	4.2424454571473e-15	pre-VDZ, non-responders vs responders (responders as reference)
PBMCs	scRNAseq	monocytes	PCBP2	1.38358989358258e-19	-0.170123269065582	0.691	0.75	4.64028378509727e-15	pre-VDZ, non-responders vs responders (responders as reference)
PBMCs	scRNAseq	monocytes	RPS3	1.47596881636274e-19	-0.190082257257528	0.897	0.927	4.95010421631734e-15	pre-VDZ, non-responders vs responders (responders as reference)
PBMCs	scRNAseq	monocytes	HGSNAT	1.4978397276595e-19	0.115548906514801	0.261	0.198	5.02345487862443e-15	pre-VDZ, non-responders vs responders (responders as reference)
PBMCs	scRNAseq	monocytes	UQCRH	1.64069116298387e-19	-0.160695319582129	0.646	0.699	5.5025500224153e-15	pre-VDZ, non-responders vs responders (responders as reference)
PBMCs	scRNAseq	monocytes	RPL8	1.64907505535487e-19	-0.163401208728964	0.908	0.937	5.53066792064915e-15	pre-VDZ, non-responders vs responders (responders as reference)
PBMCs	scRNAseq	monocytes	EIF3K	1.69747563860924e-19	-0.156461856598928	0.699	0.756	5.69299379676769e-15	pre-VDZ, non-responders vs responders (responders as reference)
PBMCs	scRNAseq	monocytes	PGD	1.80719907324983e-19	-0.114487009345787	0.342	0.419	6.06098425186527e-15	pre-VDZ, non-responders vs responders (responders as reference)
PBMCs	scRNAseq	monocytes	ZNF326	1.83399502677248e-19	-0.116626964494275	0.222	0.283	6.15085252078953e-15	pre-VDZ, non-responders vs responders (responders as reference)
PBMCs	scRNAseq	monocytes	RPS20	2.11767644286945e-19	-0.196652864235031	0.866	0.9	7.10226325409557e-15	pre-VDZ, non-responders vs responders (responders as reference)
PBMCs	scRNAseq	monocytes	INO80D	2.16521474860106e-19	-0.121107188708913	0.241	0.303	7.26169722385823e-15	pre-VDZ, non-responders vs responders (responders as reference)
PBMCs	scRNAseq	monocytes	SGSH	2.39920998656528e-19	-0.0682838898726044	0.068	0.111	8.04647045294263e-15	pre-VDZ, non-responders vs responders (responders as reference)
PBMCs	scRNAseq	monocytes	UBXN7	2.44233932427124e-19	-0.121952155504461	0.247	0.309	8.19111762574088e-15	pre-VDZ, non-responders vs responders (responders as reference)
PBMCs	scRNAseq	monocytes	EZH1	2.47102928899248e-19	-0.0894463027114329	0.127	0.18	8.28733802942298e-15	pre-VDZ, non-responders vs responders (responders as reference)
PBMCs	scRNAseq	monocytes	PARP14	2.65380533228488e-19	0.0973772915385218	0.48	0.506	8.90033232341703e-15	pre-VDZ, non-responders vs responders (responders as reference)
PBMCs	scRNAseq	monocytes	NOTCH1	2.68348630098846e-19	-0.156709591132305	0.44	0.497	8.99987635625508e-15	pre-VDZ, non-responders vs responders (responders as reference)
PBMCs	scRNAseq	monocytes	PLBD1	2.79963482108137e-19	-0.00309217196608236	0.479	0.543	9.38941526294269e-15	pre-VDZ, non-responders vs responders (responders as reference)
PBMCs	scRNAseq	monocytes	EIF2S2	3.11929246156051e-19	-0.126058601854913	0.303	0.372	1.04614830575816e-14	pre-VDZ, non-responders vs responders (responders as reference)
PBMCs	scRNAseq	monocytes	SLC2A6	3.14063279796899e-19	-0.116124547500539	0.165	0.224	1.05330542778284e-14	pre-VDZ, non-responders vs responders (responders as reference)
PBMCs	scRNAseq	monocytes	GOLGA4	3.52433356593984e-19	-0.149387990139294	0.399	0.47	1.1819909913449e-14	pre-VDZ, non-responders vs responders (responders as reference)
PBMCs	scRNAseq	monocytes	ENO1	3.60609504285279e-19	-0.127506804243884	0.737	0.8	1.20941215547197e-14	pre-VDZ, non-responders vs responders (responders as reference)
PBMCs	scRNAseq	monocytes	ZFX	3.68376078099606e-19	-0.105683844703382	0.182	0.238	1.23545969073046e-14	pre-VDZ, non-responders vs responders (responders as reference)
PBMCs	scRNAseq	monocytes	SRSF11	3.81557536682185e-19	-0.145983035912738	0.513	0.561	1.27966766652471e-14	pre-VDZ, non-responders vs responders (responders as reference)
PBMCs	scRNAseq	monocytes	R3HDM4	4.04684146110642e-19	-0.103970255732041	0.211	0.267	1.35722968922587e-14	pre-VDZ, non-responders vs responders (responders as reference)
PBMCs	scRNAseq	monocytes	RGS1	4.3168165279024e-19	0.147131004568076	0.167	0.113	1.44777392712791e-14	pre-VDZ, non-responders vs responders (responders as reference)
PBMCs	scRNAseq	monocytes	SOCS6	4.34154891995667e-19	-0.0952637490864386	0.124	0.18	1.45606867677507e-14	pre-VDZ, non-responders vs responders (responders as reference)
PBMCs	scRNAseq	monocytes	EVI2A	4.45089283911458e-19	-0.111126573121584	0.389	0.467	1.49274044038225e-14	pre-VDZ, non-responders vs responders (responders as reference)
PBMCs	scRNAseq	monocytes	NCKAP1L	4.60938129659862e-19	-0.142082386327838	0.479	0.548	1.54589429925324e-14	pre-VDZ, non-responders vs responders (responders as reference)
PBMCs	scRNAseq	monocytes	KHDRBS1	5.40954903408827e-19	-0.131499586973491	0.481	0.557	1.81425455505253e-14	pre-VDZ, non-responders vs responders (responders as reference)
PBMCs	scRNAseq	monocytes	ZNF207	5.60593846592173e-19	-0.152225168429181	0.654	0.699	1.88011964270083e-14	pre-VDZ, non-responders vs responders (responders as reference)
PBMCs	scRNAseq	monocytes	SFR1	5.61751943927898e-19	-0.0822319654306214	0.083	0.127	1.88400366954538e-14	pre-VDZ, non-responders vs responders (responders as reference)
PBMCs	scRNAseq	monocytes	KLHL21	5.82092584199205e-19	-0.11281221948169	0.2	0.263	1.9522221088873e-14	pre-VDZ, non-responders vs responders (responders as reference)
PBMCs	scRNAseq	monocytes	NUDT16	6.46458432369056e-19	-0.0944709994869853	0.155	0.214	2.16809229047934e-14	pre-VDZ, non-responders vs responders (responders as reference)
PBMCs	scRNAseq	monocytes	RAD23B	6.76206531221257e-19	-0.113411257190683	0.269	0.338	2.26786146440985e-14	pre-VDZ, non-responders vs responders (responders as reference)
PBMCs	scRNAseq	monocytes	TOMM7	6.76810339239958e-19	-0.166894964816538	0.764	0.794	2.26988651574297e-14	pre-VDZ, non-responders vs responders (responders as reference)
PBMCs	scRNAseq	monocytes	NKIRAS2	7.11983544949411e-19	-0.095313810594329	0.146	0.201	2.38785041305133e-14	pre-VDZ, non-responders vs responders (responders as reference)
PBMCs	scRNAseq	monocytes	CFL1	7.26499468620894e-19	-0.116276917180905	0.868	0.913	2.43653391786076e-14	pre-VDZ, non-responders vs responders (responders as reference)
PBMCs	scRNAseq	monocytes	COTL1	8.03005289312594e-19	-0.143851278897587	0.911	0.944	2.69311913929658e-14	pre-VDZ, non-responders vs responders (responders as reference)
PBMCs	scRNAseq	monocytes	COL4A3BP	8.39634842532402e-19	-0.13268107753542	0.393	0.462	2.81596733488517e-14	pre-VDZ, non-responders vs responders (responders as reference)
PBMCs	scRNAseq	monocytes	NLRP3	8.43288059842128e-19	-0.214046263301979	0.548	0.571	2.82821949509853e-14	pre-VDZ, non-responders vs responders (responders as reference)
PBMCs	scRNAseq	monocytes	SLU7	8.5286950076391e-19	-0.120268998319599	0.304	0.372	2.860353731662e-14	pre-VDZ, non-responders vs responders (responders as reference)
PBMCs	scRNAseq	monocytes	FEM1B	8.77367141729327e-19	-0.109175466803569	0.2	0.26	2.94251391993182e-14	pre-VDZ, non-responders vs responders (responders as reference)
PBMCs	scRNAseq	monocytes	PPP1R18	9.0910253293391e-19	-0.121023403221794	0.4	0.475	3.04894807495375e-14	pre-VDZ, non-responders vs responders (responders as reference)
PBMCs	scRNAseq	monocytes	DENND4A	9.10278984732143e-19	-0.139412876087352	0.343	0.407	3.05289365899466e-14	pre-VDZ, non-responders vs responders (responders as reference)
PBMCs	scRNAseq	monocytes	TPM3	9.12301606041534e-19	-0.0670955809930023	0.854	0.905	3.0596771263421e-14	pre-VDZ, non-responders vs responders (responders as reference)
PBMCs	scRNAseq	monocytes	NSA2	9.30087953678948e-19	-0.13607831128098	0.422	0.495	3.11932897904846e-14	pre-VDZ, non-responders vs responders (responders as reference)
PBMCs	scRNAseq	monocytes	SMIM26	9.33722506460868e-19	-0.117642072478391	0.294	0.359	3.13151854216846e-14	pre-VDZ, non-responders vs responders (responders as reference)
PBMCs	scRNAseq	monocytes	IL4R	1.06489571868357e-18	-0.114624320602072	0.26	0.329	3.57144726132096e-14	pre-VDZ, non-responders vs responders (responders as reference)
PBMCs	scRNAseq	monocytes	SYNE3	1.09588044912417e-18	-0.140153672334487	0.288	0.352	3.67536385027264e-14	pre-VDZ, non-responders vs responders (responders as reference)
PBMCs	scRNAseq	monocytes	SERBP1	1.16577884635692e-18	-0.143702558154702	0.509	0.577	3.90978909491185e-14	pre-VDZ, non-responders vs responders (responders as reference)
PBMCs	scRNAseq	monocytes	YWHAG	1.30698236344951e-18	-0.149775996752235	0.457	0.51	4.38335745053696e-14	pre-VDZ, non-responders vs responders (responders as reference)
PBMCs	scRNAseq	monocytes	ARPC5	1.36986847492637e-18	-0.141363517008085	0.816	0.863	4.59426489120805e-14	pre-VDZ, non-responders vs responders (responders as reference)
PBMCs	scRNAseq	monocytes	PTP4A2	1.40705798799789e-18	-0.115049337789052	0.783	0.842	4.71899108014733e-14	pre-VDZ, non-responders vs responders (responders as reference)
PBMCs	scRNAseq	monocytes	HLA-E	1.50560405409835e-18	-0.0756422172383426	0.864	0.912	5.04949487663504e-14	pre-VDZ, non-responders vs responders (responders as reference)
PBMCs	scRNAseq	monocytes	ABHD5	1.50628805721711e-18	-0.157999959595208	0.32	0.388	5.05178888629474e-14	pre-VDZ, non-responders vs responders (responders as reference)
PBMCs	scRNAseq	monocytes	MBP	1.60658458015551e-18	-0.16864220497212	0.686	0.719	5.38816336492554e-14	pre-VDZ, non-responders vs responders (responders as reference)
PBMCs	scRNAseq	monocytes	LEPROT	1.66432666173362e-18	-0.124286320906399	0.386	0.461	5.58181875812221e-14	pre-VDZ, non-responders vs responders (responders as reference)
PBMCs	scRNAseq	monocytes	SYK	1.68660208262301e-18	-0.122887004202189	0.437	0.513	5.65652606470104e-14	pre-VDZ, non-responders vs responders (responders as reference)
PBMCs	scRNAseq	monocytes	WASHC4	1.754756715253e-18	-0.132502753957819	0.398	0.467	5.88510307161553e-14	pre-VDZ, non-responders vs responders (responders as reference)
PBMCs	scRNAseq	monocytes	PRPF4B	1.83574715902386e-18	-0.127101159561547	0.356	0.424	6.15672882193423e-14	pre-VDZ, non-responders vs responders (responders as reference)
PBMCs	scRNAseq	monocytes	RPS3A	1.88193688821517e-18	-0.200940822121362	0.917	0.936	6.31163993569603e-14	pre-VDZ, non-responders vs responders (responders as reference)
PBMCs	scRNAseq	monocytes	PLA2G16	2.01237954903694e-18	-0.0712550203828859	0.072	0.116	6.74911853156008e-14	pre-VDZ, non-responders vs responders (responders as reference)
PBMCs	scRNAseq	monocytes	RHOQ	2.12318092820116e-18	-0.135162094412597	0.423	0.494	7.12072419700105e-14	pre-VDZ, non-responders vs responders (responders as reference)
PBMCs	scRNAseq	monocytes	HSPA4	2.16971199359701e-18	-0.0972932202166148	0.155	0.209	7.27678008412566e-14	pre-VDZ, non-responders vs responders (responders as reference)
PBMCs	scRNAseq	monocytes	ARL8A	2.24982233931768e-18	-0.115726288395755	0.306	0.378	7.54545416160363e-14	pre-VDZ, non-responders vs responders (responders as reference)
PBMCs	scRNAseq	monocytes	RAB8B	2.25056013858282e-18	-0.125234731306431	0.323	0.393	7.54792859277908e-14	pre-VDZ, non-responders vs responders (responders as reference)
PBMCs	scRNAseq	monocytes	TYMP	2.27700679183388e-18	0.0179722608632447	0.843	0.888	7.63662537845247e-14	pre-VDZ, non-responders vs responders (responders as reference)
PBMCs	scRNAseq	monocytes	ATXN2	2.27941046397353e-18	-0.100115088495543	0.151	0.209	7.64468681407443e-14	pre-VDZ, non-responders vs responders (responders as reference)
PBMCs	scRNAseq	monocytes	DEDD2	2.3642227362738e-18	-0.110821476910968	0.211	0.269	7.92913021291506e-14	pre-VDZ, non-responders vs responders (responders as reference)
PBMCs	scRNAseq	monocytes	ARHGAP45	2.44756382215035e-18	-0.112142720740039	0.303	0.374	8.20863954672785e-14	pre-VDZ, non-responders vs responders (responders as reference)
PBMCs	scRNAseq	monocytes	WAC-AS1	2.46106515160968e-18	-0.0955959433666112	0.139	0.195	8.25392030546853e-14	pre-VDZ, non-responders vs responders (responders as reference)
PBMCs	scRNAseq	monocytes	UBE2H	2.5170770206197e-18	-0.136486387982669	0.353	0.416	8.44177291175433e-14	pre-VDZ, non-responders vs responders (responders as reference)
PBMCs	scRNAseq	monocytes	STXBP2	2.52257368488872e-18	-0.135189645055312	0.598	0.669	8.4602076243798e-14	pre-VDZ, non-responders vs responders (responders as reference)
PBMCs	scRNAseq	monocytes	RPS19	2.58481559393336e-18	-0.203108566223825	0.938	0.955	8.66895453893371e-14	pre-VDZ, non-responders vs responders (responders as reference)
PBMCs	scRNAseq	monocytes	BPTF	2.5934029107321e-18	-0.145404400548275	0.398	0.458	8.6977546820133e-14	pre-VDZ, non-responders vs responders (responders as reference)
PBMCs	scRNAseq	monocytes	CLTA	2.75163694581698e-18	-0.138162654390765	0.547	0.61	9.228439988881e-14	pre-VDZ, non-responders vs responders (responders as reference)
PBMCs	scRNAseq	monocytes	ZNF385A	2.767415321177e-18	-0.16177663913179	0.53	0.588	9.28135750416341e-14	pre-VDZ, non-responders vs responders (responders as reference)
PBMCs	scRNAseq	monocytes	MIER1	2.80960142271033e-18	-0.132948766031914	0.424	0.491	9.42284125148591e-14	pre-VDZ, non-responders vs responders (responders as reference)
PBMCs	scRNAseq	monocytes	YTHDC1	2.93054951908831e-18	-0.136415563441616	0.44	0.486	9.82847697711839e-14	pre-VDZ, non-responders vs responders (responders as reference)
PBMCs	scRNAseq	monocytes	RFFL	2.97000476392995e-18	-0.0986666256603849	0.146	0.199	9.96080197726826e-14	pre-VDZ, non-responders vs responders (responders as reference)
PBMCs	scRNAseq	monocytes	PER2	3.00962677902147e-18	-0.117977800007007	0.222	0.281	1.00936862914822e-13	pre-VDZ, non-responders vs responders (responders as reference)
PBMCs	scRNAseq	monocytes	TBC1D15	3.05658897955483e-18	-0.115000643636325	0.249	0.312	1.0251188119631e-13	pre-VDZ, non-responders vs responders (responders as reference)
PBMCs	scRNAseq	monocytes	SGK1	3.10883054234836e-18	-0.211564711017342	0.498	0.566	1.04263958729279e-13	pre-VDZ, non-responders vs responders (responders as reference)
PBMCs	scRNAseq	monocytes	PDP1	3.1820837907076e-18	-0.0943758660982973	0.177	0.24	1.06720726172751e-13	pre-VDZ, non-responders vs responders (responders as reference)
PBMCs	scRNAseq	monocytes	CC2D1B	3.32981781057389e-18	-0.0686673616413873	0.07	0.112	1.11675429731027e-13	pre-VDZ, non-responders vs responders (responders as reference)
PBMCs	scRNAseq	monocytes	PIK3CB	3.35461588075677e-18	-0.104732728817417	0.184	0.235	1.12507107408821e-13	pre-VDZ, non-responders vs responders (responders as reference)
PBMCs	scRNAseq	monocytes	TOR4A	3.46981259781534e-18	-0.091808201136236	0.158	0.215	1.16370574905531e-13	pre-VDZ, non-responders vs responders (responders as reference)
PBMCs	scRNAseq	monocytes	OSGIN2	3.67383289614786e-18	-0.0907598698062539	0.134	0.186	1.23213007671007e-13	pre-VDZ, non-responders vs responders (responders as reference)
PBMCs	scRNAseq	monocytes	IL17RA	4.44841466895748e-18	-0.119211110171947	0.314	0.382	1.49190931167496e-13	pre-VDZ, non-responders vs responders (responders as reference)
PBMCs	scRNAseq	monocytes	TAB2	4.52770336342744e-18	-0.112232902962811	0.222	0.282	1.51850115402629e-13	pre-VDZ, non-responders vs responders (responders as reference)
PBMCs	scRNAseq	monocytes	TRIP12	4.56293789880164e-18	-0.115094093575447	0.39	0.465	1.53031811250009e-13	pre-VDZ, non-responders vs responders (responders as reference)
PBMCs	scRNAseq	monocytes	TXNRD1	4.57882014674056e-18	-0.134183064089413	0.306	0.369	1.53564470081385e-13	pre-VDZ, non-responders vs responders (responders as reference)
PBMCs	scRNAseq	monocytes	TMEM165	4.6109029821857e-18	-0.130139236054138	0.422	0.482	1.54640464216544e-13	pre-VDZ, non-responders vs responders (responders as reference)
PBMCs	scRNAseq	monocytes	DICER1	4.73797812125824e-18	-0.13036143664437	0.333	0.401	1.58902310230759e-13	pre-VDZ, non-responders vs responders (responders as reference)
PBMCs	scRNAseq	monocytes	CARD19	4.86198607389197e-18	-0.121985407108069	0.414	0.489	1.63061288946189e-13	pre-VDZ, non-responders vs responders (responders as reference)
PBMCs	scRNAseq	monocytes	RARRES3	4.96399511683164e-18	0.107005239422501	0.275	0.245	1.664824682283e-13	pre-VDZ, non-responders vs responders (responders as reference)
PBMCs	scRNAseq	monocytes	PABPN1	5.16557878136465e-18	-0.108632036794799	0.232	0.29	1.73243181169408e-13	pre-VDZ, non-responders vs responders (responders as reference)
PBMCs	scRNAseq	monocytes	BTF3	5.23025312573622e-18	-0.167673696155493	0.807	0.842	1.75412229330941e-13	pre-VDZ, non-responders vs responders (responders as reference)
PBMCs	scRNAseq	monocytes	PSMA4	5.27196290074238e-18	0.0403201922010437	0.444	0.476	1.76811091765098e-13	pre-VDZ, non-responders vs responders (responders as reference)
PBMCs	scRNAseq	monocytes	IRF2BP2	5.39888935643777e-18	-0.178720550930132	0.68	0.723	1.8106795123621e-13	pre-VDZ, non-responders vs responders (responders as reference)
PBMCs	scRNAseq	monocytes	CCL4	5.63639398947337e-18	-0.673197227074398	0.102	0.149	1.89033381618958e-13	pre-VDZ, non-responders vs responders (responders as reference)
PBMCs	scRNAseq	monocytes	YPEL2	5.71544784904469e-18	-0.0930872714563166	0.137	0.193	1.91684689961261e-13	pre-VDZ, non-responders vs responders (responders as reference)
PBMCs	scRNAseq	monocytes	CDV3	5.73317960896889e-18	-0.0924123700552733	0.67	0.739	1.92279377725599e-13	pre-VDZ, non-responders vs responders (responders as reference)
PBMCs	scRNAseq	monocytes	TUBA1A	6.22261491240209e-18	-0.164181999446737	0.403	0.469	2.08694058932141e-13	pre-VDZ, non-responders vs responders (responders as reference)
PBMCs	scRNAseq	monocytes	SCAND1	6.56957712880291e-18	-0.112790257629013	0.335	0.405	2.20330477745792e-13	pre-VDZ, non-responders vs responders (responders as reference)
PBMCs	scRNAseq	monocytes	QKI	6.64586804071867e-18	-0.150268839567965	0.697	0.747	2.22889122349623e-13	pre-VDZ, non-responders vs responders (responders as reference)
PBMCs	scRNAseq	monocytes	PPP2CA	7.4251313946139e-18	-0.131843364690558	0.482	0.542	2.49024056712561e-13	pre-VDZ, non-responders vs responders (responders as reference)
PBMCs	scRNAseq	monocytes	CLIC1	7.49224374119066e-18	-0.13374953430356	0.75	0.806	2.51274870592052e-13	pre-VDZ, non-responders vs responders (responders as reference)
PBMCs	scRNAseq	monocytes	LACC1	8.32146194369724e-18	-0.125637753558637	0.21	0.259	2.79085190667718e-13	pre-VDZ, non-responders vs responders (responders as reference)
PBMCs	scRNAseq	monocytes	PGPEP1	8.3646767068937e-18	-0.077569014680577	0.085	0.13	2.80534527395801e-13	pre-VDZ, non-responders vs responders (responders as reference)
PBMCs	scRNAseq	monocytes	RASSF5	8.41108093364972e-18	0.149394808878395	0.598	0.555	2.82090832352744e-13	pre-VDZ, non-responders vs responders (responders as reference)
PBMCs	scRNAseq	monocytes	CEP350	8.467420881933e-18	-0.135065080386079	0.36	0.405	2.83980361538269e-13	pre-VDZ, non-responders vs responders (responders as reference)
PBMCs	scRNAseq	monocytes	CHD8	8.9100867340562e-18	-0.0969008693225717	0.166	0.224	2.98826488886777e-13	pre-VDZ, non-responders vs responders (responders as reference)
PBMCs	scRNAseq	monocytes	LCP2	9.26931092911883e-18	0.105658338950531	0.676	0.698	3.10874149940787e-13	pre-VDZ, non-responders vs responders (responders as reference)
PBMCs	scRNAseq	monocytes	SRGAP2	9.53618226668751e-18	-0.0930215404124021	0.159	0.215	3.19824480860166e-13	pre-VDZ, non-responders vs responders (responders as reference)
PBMCs	scRNAseq	monocytes	HECTD1	9.90941240453479e-18	-0.118059042520111	0.263	0.326	3.32341873223288e-13	pre-VDZ, non-responders vs responders (responders as reference)
PBMCs	scRNAseq	monocytes	FCN1	1.00124479718641e-17	0.12175729704939	0.922	0.938	3.35797480080379e-13	pre-VDZ, non-responders vs responders (responders as reference)
PBMCs	scRNAseq	monocytes	RASSF3	1.01188427909066e-17	-0.103305095159429	0.195	0.25	3.39365749521427e-13	pre-VDZ, non-responders vs responders (responders as reference)
PBMCs	scRNAseq	monocytes	ANXA5	1.02914546423085e-17	-0.146493017168489	0.82	0.867	3.45154805793744e-13	pre-VDZ, non-responders vs responders (responders as reference)
PBMCs	scRNAseq	monocytes	SENP6	1.09122820347246e-17	-0.115028402097752	0.29	0.356	3.65976114880594e-13	pre-VDZ, non-responders vs responders (responders as reference)
PBMCs	scRNAseq	monocytes	QSOX1	1.14901801965023e-17	0.147640590521618	0.396	0.351	3.85357663430294e-13	pre-VDZ, non-responders vs responders (responders as reference)
PBMCs	scRNAseq	monocytes	IL1RN	1.172333061558e-17	-0.269665196901312	0.25	0.308	3.93177062185323e-13	pre-VDZ, non-responders vs responders (responders as reference)
PBMCs	scRNAseq	monocytes	NDRG1	1.22169857163391e-17	-0.152475126054657	0.504	0.557	4.09733266954581e-13	pre-VDZ, non-responders vs responders (responders as reference)
PBMCs	scRNAseq	monocytes	TAOK3	1.24423798125065e-17	-0.127778762985068	0.406	0.477	4.17292534151842e-13	pre-VDZ, non-responders vs responders (responders as reference)
PBMCs	scRNAseq	monocytes	TALDO1	1.30456593007738e-17	-0.132817434354415	0.758	0.812	4.37525321629352e-13	pre-VDZ, non-responders vs responders (responders as reference)
PBMCs	scRNAseq	monocytes	DDI2	1.34733978045867e-17	-0.117898478076405	0.184	0.24	4.51870815570228e-13	pre-VDZ, non-responders vs responders (responders as reference)
PBMCs	scRNAseq	monocytes	SSFA2	1.40733038098728e-17	-0.156288418153593	0.43	0.48	4.71990463175515e-13	pre-VDZ, non-responders vs responders (responders as reference)
PBMCs	scRNAseq	monocytes	SLMAP	1.42936928556797e-17	-0.081211384178461	0.099	0.148	4.79381870993786e-13	pre-VDZ, non-responders vs responders (responders as reference)
PBMCs	scRNAseq	monocytes	SDCCAG8	1.67135372756714e-17	-0.0999267984387229	0.179	0.237	5.60538613151466e-13	pre-VDZ, non-responders vs responders (responders as reference)
[truncated: 14,062 more rows]

[truncated: 3 more sheets: Supplementary Table 11, Supplementary Table 12, Supplementary Table 13]
