# Supplementary figures and images for: High-dimensional single-cell analysis identifies cellular signatures associated with response to vedolizumab therapy in ulcerative colitis
Source: Research Square preprint supplement (doi:10.21203/rs.3.rs-3348629/v1), 2023-10-02

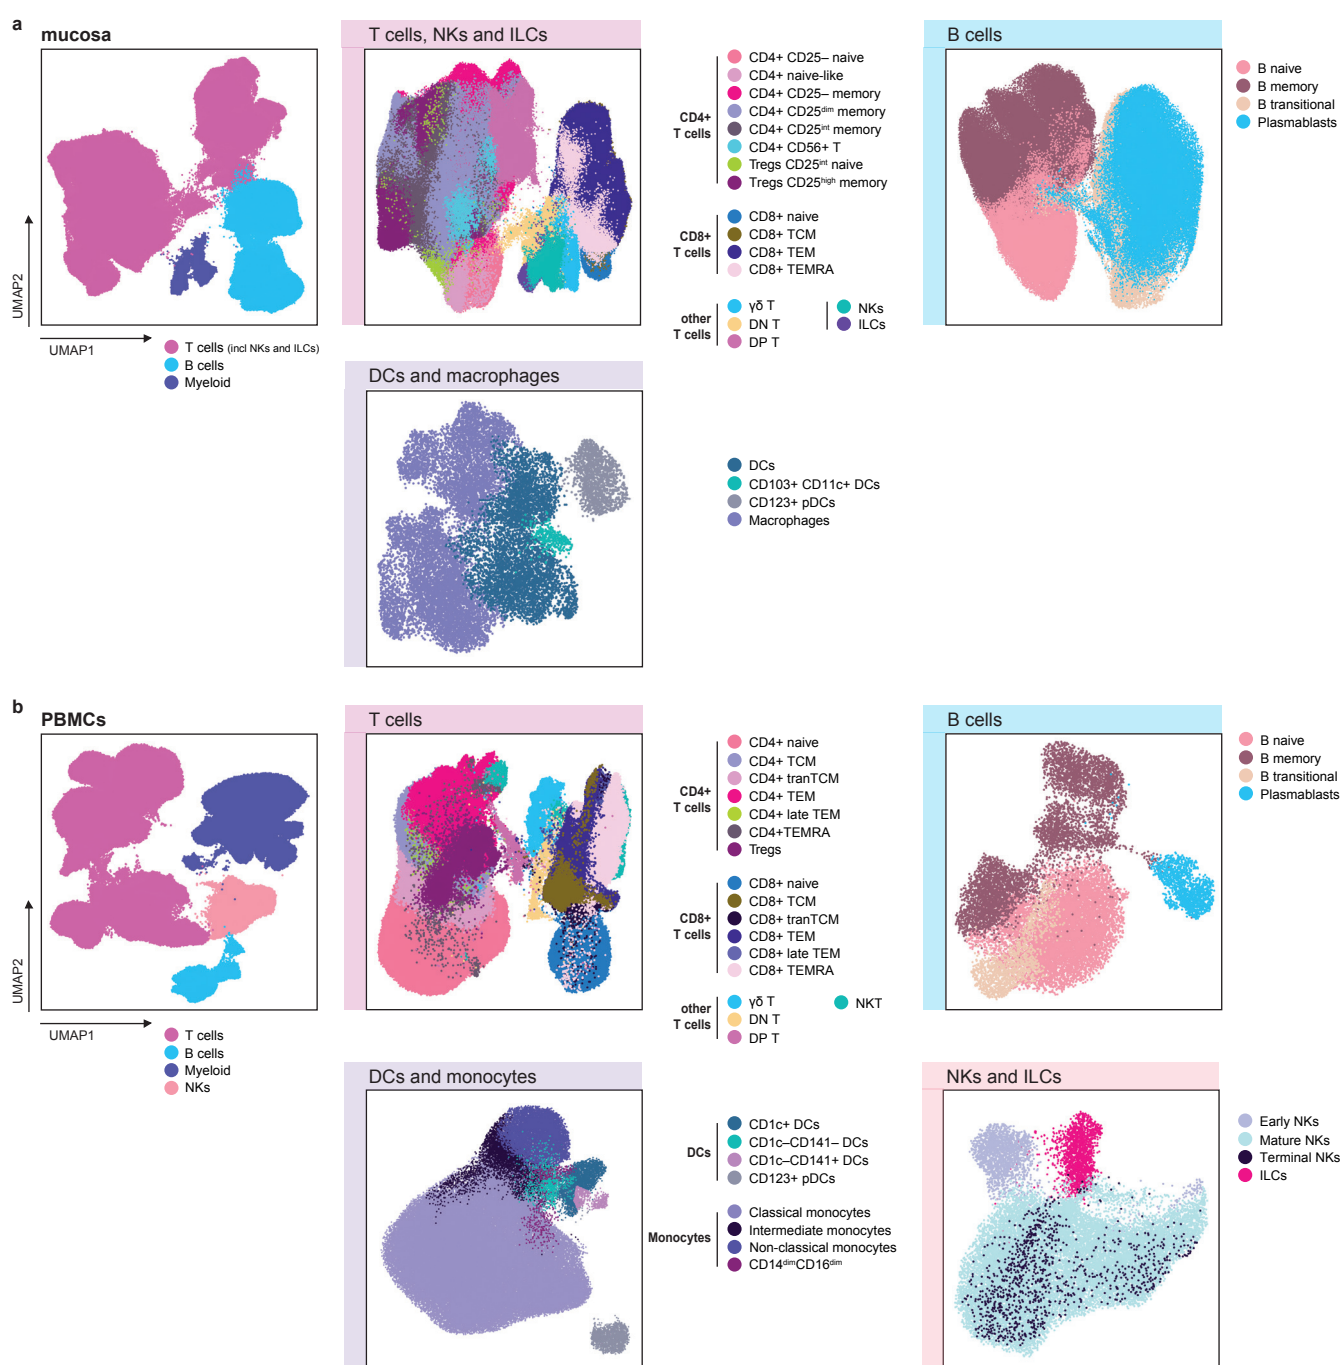

Supplement: Supplementary file 1 [file a9a31729ca0358e2f0f9b3eb.pdf]

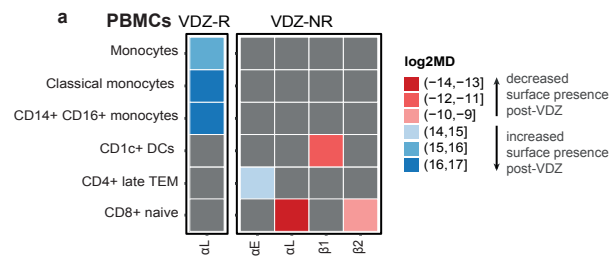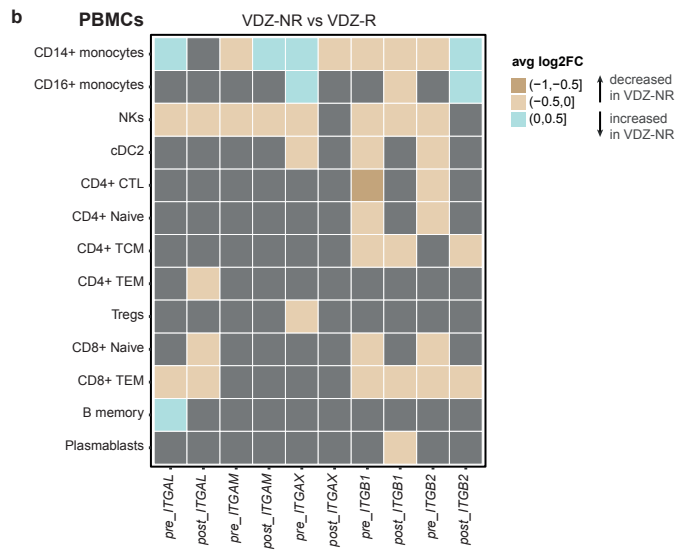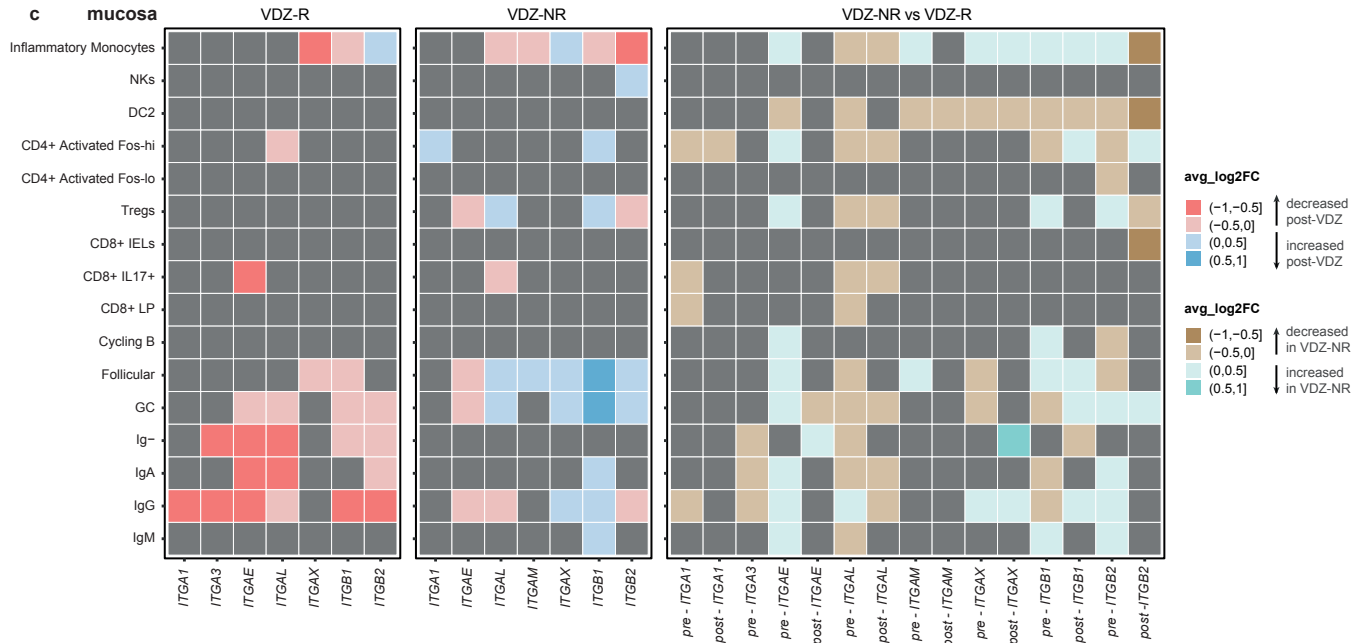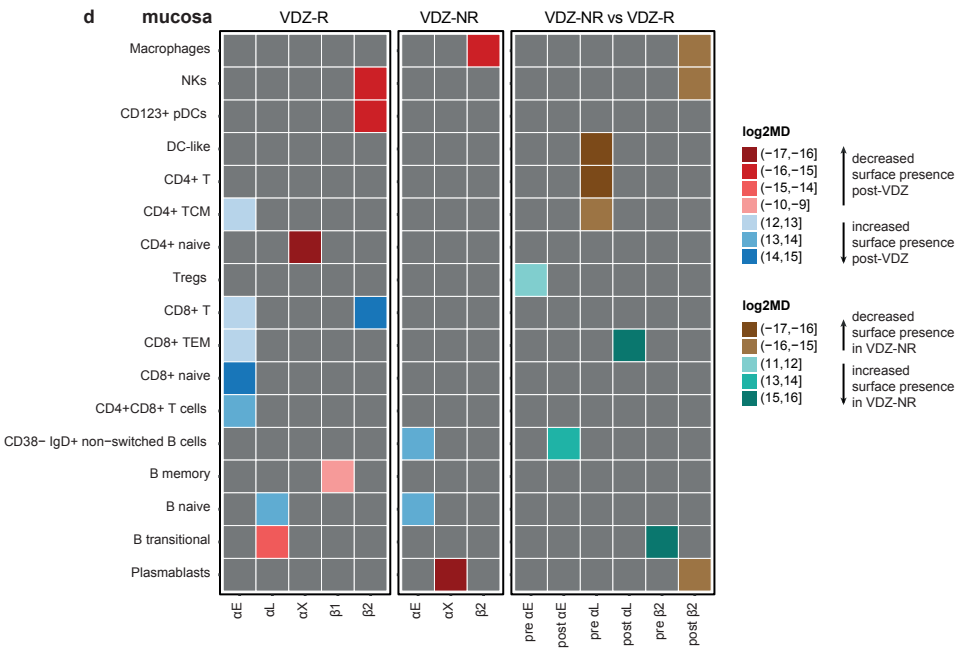

Supplement: Supplementary file 2 [file cd0f94ab110e052f102fbb50.pdf]

**mucosa (scRNAseq)**  
**pseudobulk**

**a**

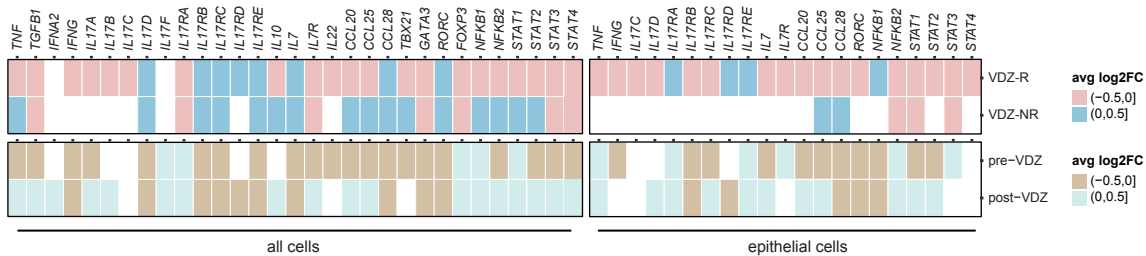

**b**

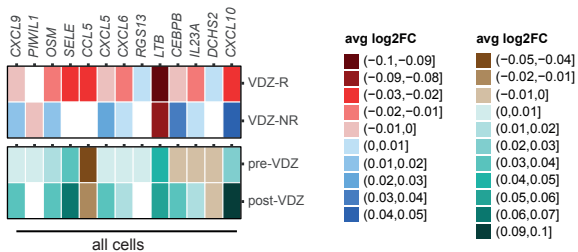

Supplement: Supplementary file 3 [file efb78aa70f32b9b1f683d52e.pdf]
